# Supplementary material for: Early life stressful experiences escalate aggressive behavior in adulthood via changes in transthyretin expression and function
Source: eLife. 2022 Oct 13;11:e77968. doi: 10.7554/eLife.77968 (PMC9633068; doi:10.7554/eLife.77968)
Supplement: Figure 1—source data 1. [file elife-77968-fig1-data1.xlsx]

## Sheet: Sheet1
	Eagg	Hagg	Magg
Attack Latency	25	105	148
	28	93	122
	18	83	120
	24	85	300
	17	87	151
	5	80	156
	5	90	160
	7	88	164
	8	83
	17	81
	5	90
	6	88
	24	85
	28	85
	22	80
	8
	8
	5
	5
	14
	24
	50
	12
	12
	55
	45
	50
	30
	53
	5
	5
	15
