# Supplementary material for: Early life stressful experiences escalate aggressive behavior in adulthood via changes in transthyretin expression and function
Source: eLife. 2022 Oct 13;11:e77968. doi: 10.7554/eLife.77968 (PMC9633068; doi:10.7554/eLife.77968)
Supplement: Figure 4—source data 1. [file elife-77968-fig4-data1.xlsx]

## Sheet: 4B-I
Fig 4B T4 serum concentration (ng/ml) Adult male						Fig 4C T3 serum concentration (ng/ml) Adult male
N- biological replicates						N- biological replicates
	Ctrl		Seagg
N1	126.88	N1	146.12				Ctrl		Seagg
N2	98	N2	123.9			N1	7.7	N1	7.16
N3	118.2	N3	122.26			N2	8.17	N2	7.18
N4	116.9	N4	128.74			N3	8.23	N3	7.11
N5	115.5	N5	124			N4	8.8	N4	8.5
Mean	115.096		129.004			N5	8.5	N5	8
SD	10.5379		9.86914			Mean	8.28		7.59
pvalue	0.0635205					SD	0.409207		0.628411
						pvalue	0.079388
Fig 4D T4 serum concentration (ng/ml) PPS male						Fig 4E T3 serum concentration (ng/ml) PPS male
N- biological replicates						N- biological replicates
	NS		PPS			NS		PPS
N1	43.1	N1	44.23		N1	6.56	N1	6.6
N2	44.54	N2	45.78		N2	4.88	N2	7.5
N3	44.24	N3	36.16		N3	7.1	N3	6.4
N4	47.74	N4	40.2		N4	5.6	N4	7.6
N5	50.44	N5	34.8		N5	5.9	N5	6.4
Mean	46.012		40.234		Mean	6.008		6.9
SD	3.01578		4.30936		SD	0.85844		0.6
pvalue	0.0587747				pvalue	0.0976563
Fig 4F T4 Hypo and PFC content (ng/mg tissue wt) Adult male							Fig 4G T3 Hypo and PFC content (ng/mg tissue wt) Adult male
N- biological replicates
HYPO T4 Conc. (ng/mg tissue weight)
	Ctrl		Seagg					Ctrl			Seagg
N1	0.7	N1	0.36					N1	0.048	N1	0.0224
N2	0.77	N2	0.44					N2	0.049	N2	0.017
N3	0.8	N3	0.42					N3	0.057	N3	0.015
N4	0.73	N4	0.38					N4	0.044	N4	0.016
N5	0.8	N5	0.5					N5	0.052	N5	0.02
Mean	0.76		0.42					Mean	0.05		0.01808
SD	0.0441588		0.0547723					SD	0.00484768		0.00305483
pvalue	6.63049e-06							pvalue	6.6667e-06
PFC T4 Conc. (ng/mg tissue weight)									PFC T4 Conc. (ng/mg tissue weight)
N1	0.34	N1	0.74					N1	0.0042	N1	0.0098
N2	0.35	N2	0.82					N2	0.0023	N2	0.0092
N3	0.32	N3	0.78					N3	0.003	N3	0.009
N4	0.38	N4	0.85					N4	0.0049	N4	0.0097
N5	0.36	N5	0.76					N5	0.0057	N5	0.0098
Mean	0.35		0.79					Mean	0.00402		0.0095
SD	0.0223607		0.0447214					SD	0.00138094		0.000374166
pvalue	1.36077e-06							pvalue	0.000545197
Fig 4H T4 Hypo and PFC content (ng/mg tissue wt) PPS male								Fig 4I T3 Hypo and PFC content (ng/mg tissue wt) PPS male
N- biological replicates								N- biological replicates
HYPO T4 Content (ng/mg tissue weight)								NS			PPS
	NS		PPS					Mean	SD	N	Mean	SD	N
N1	2.04	N1	1.02					0.013616	0.00112	5	0.007	0.000645	5
N2	2.05	N2	1.03					0.005	0.000331	5	0.008705	0.000111	5
N3	1.97	N3	1.04
N4	1.92	N4	1
N5	2.02	N5	0.99						PFC T3 Conc. (ng/ml)
Mean	2		1.016							ng/ml	tissue wt	ng/mg
SD	0.0543139		0.0207364						C1	0.461	88	0.00523864	E1
pvalue	1.72284e-07								C2	0.4734	92	0.00514565	E2
									C3	0.478	83	0.00575904	E3
	NS		PPS								Avg	0.00538111									HYPO T3 Conc. (ng/ml)
N1	0.222	N1	0.5								SD	0.000330581					ng/ml	tissue wt	ng/mg
N2	0.19	N2	0.57							pvalue	7.87051e-05						0.4945	56	0.00883036		C1
N3	0.226	N3	0.45														0.4828	56	0.00862143		C2
N4	0.182	N4	0.48														0.4938	57	0.00866316		C3
N5	0.19	N5	0.46															Avg	0.00870498
Mean	0.202		0.492															SD	0.000110565
SD	0.0203961		0.0476445
pvalue	3.33295e-05

## Sheet: S4 A-D
Adult female
Serum T4 Conc. (ng/ml)					PFC T4 Conc. (ng/mg tissue weight)				HYPO T4 Conc. (ng/mg tissue weight)
Sample	Ctrl		SNAgg		Sample	Ctrl		SNAgg		Sample	Ctrl		SNAgg
N1	133.37	N1	132.56		N1	0.35	N1	0.25		N1	0.73	N1	1
N2	135.56	N2	132.45		N2	0.314	N2	0.18		N2	0.65	N2	0.88
N3	134.34	N3	129		N3	0.355	N3	0.27		N3	0.78	N3	1.08
Avg	134.423		131.337		AVG.	0.339667		0.233333		Avg	0.72
SD	1.09738		2.02436		SD	0.0223681		0.0472582		SD	0.0655744		0.986667
pvalue	0.0809791				pvalue	0.0420465				pvalue	0.0243031		0.100664
Serum T3 Conc. (ng/ml)					PFC T3 Conc. (ng/mg tissue weight)				HYPO T3 Conc. (ng/mg tissue weight)
Sample	Ctrl		SNAgg		Sample	Ctrl		SNAgg	Sample	Ctrl		SNAgg
N1	7.17	N1	7.1823		N1	0.00619	N1	0.00573	N1	0.00871	N1	0.00963
N2	6.8	N2	8.24		N2	0.00703	N2	0.00511	N2	0.00852	N2	0.00948
N3	8	N3	7.08		N3	0.0061	N3	0.00467	N3	0.00786	N3	0.0095
Avg	7.32333		7.50077		AVG.	0.00644		0.00517	AVG.	0.00836333		0.00953667
SD	0.614519		0.642235		SD	0.000512933		0.000532541	SD	0.000446132
pvalue	0.746985				pvalue	0.0410127			pvalue	0.0411026
