# Supplementary material for: Early life stressful experiences escalate aggressive behavior in adulthood via changes in transthyretin expression and function
Source: eLife. 2022 Oct 13;11:e77968. doi: 10.7554/eLife.77968 (PMC9633068; doi:10.7554/eLife.77968)
Supplement: Figure 5—source data 1. [file elife-77968-fig5-data1.xlsx]

## Sheet: 5B
									Source data	Fig 5B- RI behavioural scoring % total observation time
										N- Individual animal (biological replicates)
							Group- Scr
		N1	N2	N3	N4	N5	N6	N7	N8	N9	N10	N11	N12	N13	N14	N15
Social exploration		24.3902	53.65	66.6667	7.33333	35.6667	44.42	3.33333	16.6	23.25	66.6667	24.19	25	10.2041	20.5	12.8205
Clinch attack		0	0	0	0	0	0	0	0	0	0	4.8	3	0	0	0
Other offensive behavior		0	0	3.33333	0	4.67	5.58	7	8.33	10.6	5.66667	8.3	7	5	11.5	10
Non social explore		75.6098	46.35	30	92.6667	59.6633	50	89.6667	75.07	66.15	27.6667	62.71	65	84.7959	68	77.1795
							Group-	Ttr- esiRNA
		N1	N2	N3	N4	N5	N6	N7	N8	N9	N10	N11	N12	N13	N14	N15	N16
Social exploration		0	0	0	6.49351	4.6875	0	0	0	18.8172	6.66667	5.15464	0	6	5.12	5.03	4.99
Clinch attack		62.5	54.5455	29.8507	45.4545	50	87.8378	94.7712	66	45.6989	26.6667	86.0825	68	64	56.89	80	50
Other offensive behavior		37.5	45.4545	28.3582	38.961	39.8438	12.1622	5.22876	20	35.4839	50	5.15464	30	28	25.19	7.97	4.91
Non social explore		0	0	41.791	9.09091	5.46875	0	0	14	0	16.6667	3.60825	2	2	12.8	7	40.1
										pvalue (Scr vs Ttr esiRNA)
								Social exploration		0.000283612
								Clinch attack		3.36242e-09
								Other offensive behavior		8.06067e-05
								Non social explore		1.56974e-09
