# Supplementary material for: Early life stressful experiences escalate aggressive behavior in adulthood via changes in transthyretin expression and function
Source: eLife. 2022 Oct 13;11:e77968. doi: 10.7554/eLife.77968 (PMC9633068; doi:10.7554/eLife.77968)
Supplement: Figure 5—source data 2. [file elife-77968-fig5-data2.xlsx]

## Sheet: 5C
Source data	Fig 5C- T3 content ng/mg tissue weight
	N- biological replicates
	Hypo-Hypothalamus
	Scr-Hypo	Ttr esiRNA-Hypo
N1	0.05	0.03
N2	0.072	0.034
N3	0.055	0.02
N4	0.088	0.056
N5	0.096	0.04
N6	0.07	0.032
N7	0.081	0.04
Mean	0.0731429	0.036
SD	0.0154959	0.0103095
pvalue	0.00055916
