# Supplementary material for: Early life stressful experiences escalate aggressive behavior in adulthood via changes in transthyretin expression and function
Source: eLife. 2022 Oct 13;11:e77968. doi: 10.7554/eLife.77968 (PMC9633068; doi:10.7554/eLife.77968)
Supplement: Figure 6—source data 1. [file elife-77968-fig6-data1.xlsx]

## Sheet: 6B
				Source data	Fig 6B- RI behavioural scoring % total observation time
					N- Individual animal (biological replicates)
		Social exploration		Clinch attack		Other offensive aggression		Non-Social exploration
		CF1	Eagg-F1	CF1	Eagg-F1	CF1	Eagg-F1	CF1	Eagg-F1
	N1	27.2727	4.40529	0	8.81057	0	4.40529	72.7273	82.3788
	N2	10.7527	11.4942	2.68817	28.7356	0	5.74713	86.5591	54.023
	N3	18	4.16667	0	68.3333	0	8.33333	82	44.1667
	N4	3.92157	9.30233	0	46.5116	0	11.6279	94.1176	32.5581
	N5	17.5258	5.61224	0	51.0204	0	40.8163	82.4742	2.55102
	N6	71.7949	3.96825	0	49.2064	0	41.2698	28.2051	5.55556
	N7	20.8333	6.25	0	62.5	0	31.25	79.1667	0
	N8	50	5	0	65	0	22	50	8
	N9	61	4	1.5	72	2	20	45.5	4
	N10	53	10	0	48	12	32	35	10
	N11	67	10	0	53	0	30	33	7
	N12	60	15	0	60	4	20	36	5
	pvalue (CF1 vs Eagg-F1)	0.00100996		7.90312e-07		0.000144188		0.00106058

## Sheet: 6C
Source data	Fig 6C- Attack latency (seconds)
	N- Individual animal (biological replicates)
	SEagg-F0	Eagg-F1
N1	8	5	N1
N2	14	10	N2
N3	12	5	N3
N4	5	5	N4
N5	13	16	N5
N6	7	15	N6
		22	N7
		11	N8
		15	N9
		13	N10
		6	N11
		12	N12
pvalue	0.520604
