# Supplementary material for: Early life stressful experiences escalate aggressive behavior in adulthood via changes in transthyretin expression and function
Source: eLife. 2022 Oct 13;11:e77968. doi: 10.7554/eLife.77968 (PMC9633068; doi:10.7554/eLife.77968)
Supplement: Figure 6—source data 2. [file elife-77968-fig6-data2.xlsx]

## Sheet: 6D
Fig 6D- T3 content ng/mg tissue weight			F1 male
N- biological replicates
Hypo-Hypothalamus					PFC-prefrontal cortex
	CF1		EaggF1			CF1	EaggF1
N1	0.05	N1	0.034		N1	0.012	N1	0.008
N2	0.058	N2	0.038		N2	0.008	N2	0.007
N3	0.057	N3	0.04		N3	0.01	N3	0.012
N4	0.052	N4	0.038		N4	0.013	N4	0.0084
N5	0.048	N5	0.025		N5	0.007	N5	0.009
Mean	0.053		0.035		Mean	0.01		0.00888
SD	0.0043589		0.006		SD	0.00254951		0.00188997
pvalue	0.000850728				pvalue	0.454652
