# Supplementary material for: Early life stressful experiences escalate aggressive behavior in adulthood via changes in transthyretin expression and function
Source: eLife. 2022 Oct 13;11:e77968. doi: 10.7554/eLife.77968 (PMC9633068; doi:10.7554/eLife.77968)
Supplement: Figure 7—source data 1. [file elife-77968-fig7-data1.xlsx]

## Sheet: Fig 7
Source data Fig 7-MeDIP qPCR				Fold enrichment relative to IgG
Fig 7- MedIP qPCR
Hypo	Ctrl	SEagg		PFC	Ctrl	SEagg
N1	3.89	49.5		N1	31.51	7
N2	3.58	68.23		N2	27.9	12.4
N3	7.31	50.17		N3	35.8	4.5
N4	8.07	70		N4	35.26	11.7
N5	5.59	52		N5	30	8.4
N6	7.08	58.1		N6	32	10.1
Mean	5.92	58		Mean	32.0783	9.01667
SD	1.87646	9.14573		SD	3.03582	2.98892
