# Supplementary material for: Early life stressful experiences escalate aggressive behavior in adulthood via changes in transthyretin expression and function
Source: eLife. 2022 Oct 13;11:e77968. doi: 10.7554/eLife.77968 (PMC9633068; doi:10.7554/eLife.77968)
Supplement: Supplementary file 1. [file elife-77968-supp1.xlsx]

## Sheet: Male-PFC DEGs
test_id	gene_id	gene	locus	sample_1	sample_2	status	value_1	value_2	log2(fold_change)	test_stat	p_value	q_value	significant
XLOC_006200	XLOC_006200	1810032O08Rik	11:116671659-116694868	control	expmt	OK	4103.85	1.61814	-11.3084	-4.74371	5e-05	0.0101515	yes
XLOC_001291	XLOC_001291	Gas5,Gm22357,Gm22489,Gm23212,Gm25789,Gm26224,Mir5117,Snord47,Snord78,Snord80	1:160978584-161038539	control	expmt	OK	48246.6	79.3451	-9.24807	-19.8681	5e-05	0.0101515	yes
XLOC_042356	XLOC_042356	Gm27733,Gm27927,Xist	X:103414466-103484957	control	expmt	OK	7.93619	0.0253326	-8.29131	-0.0805053	5e-05	0.0101515	yes
XLOC_028437	XLOC_028437	Rpl5	5:107900501-107987085	control	expmt	OK	8049.03	99.5785	-6.33684	-22.588	5e-05	0.0101515	yes
XLOC_015218	XLOC_015218	Ddx39b	17:35241745-35253707	control	expmt	OK	3450.24	62.4502	-5.78785	-36.2691	5e-05	0.0101515	yes
XLOC_018634	XLOC_018634	Rpl7a	2:26910763-26913318	control	expmt	OK	5630.96	141.044	-5.31917	-23.549	5e-05	0.0101515	yes
XLOC_038769	XLOC_038769	Mir6236	9:110281286-110281409	control	expmt	OK	12663.7	1396.76	-3.18055	-7.74768	5e-05	0.0101515	yes
XLOC_007454	XLOC_007454	Gm23971	11:101645739-101645930	control	expmt	OK	127.327	18.4682	-2.78542	-3.6044	5e-05	0.0101515	yes
XLOC_026893	XLOC_026893	Rps8	4:117153826-117156243	control	expmt	OK	1469.86	235.767	-2.64024	-8.56421	5e-05	0.0101515	yes
XLOC_017515	XLOC_017515	Gm23238	19:18732740-18732904	control	expmt	OK	186.076	37.2011	-2.32248	-2.57	5e-05	0.0101515	yes
XLOC_000548	XLOC_000548	Gm25939	1:72236464-72284314	control	expmt	OK	7686.71	1580.59	-2.28191	-4.06574	5e-05	0.0101515	yes
XLOC_038898	XLOC_038898	Gm26870	9:3000281-3038316	control	expmt	OK	1.73421	0.391666	-2.14658	-1.82383	0.0002	0.0336732	yes
XLOC_033258	XLOC_033258	Rps16	7:28350651-28352696	control	expmt	OK	46.458	10.753	-2.11119	-4.5762	5e-05	0.0101515	yes
XLOC_017392	XLOC_017392	Snord22	19:8725865-8725991	control	expmt	OK	17001.7	4453.62	-1.93262	-3.28169	5e-05	0.0101515	yes
XLOC_038109	XLOC_038109	Hspa8	9:40800983-40805200	control	expmt	OK	2684.15	790.124	-1.76432	-4.33865	5e-05	0.0101515	yes
XLOC_004185	XLOC_004185	Slc35d3	10:19847916-19851459	control	expmt	OK	2.84727	0.856304	-1.73339	-3.07338	5e-05	0.0101515	yes
XLOC_012835	XLOC_012835	Rnu12	15:83149643-83149794	control	expmt	OK	1628.89	502.695	-1.69614	-3.60986	5e-05	0.0101515	yes
XLOC_035787	XLOC_035787	Hbb-bs	7:103826533-103828096	control	expmt	OK	523.455	162.823	-1.68476	-4.60868	5e-05	0.0101515	yes
XLOC_012199	XLOC_012199	Nupl1	14:60219203-60251507	control	expmt	OK	46.1384	15.2593	-1.59628	-5.66561	5e-05	0.0101515	yes
XLOC_005092	XLOC_005092	Hba-a1	11:32283510-32284465	control	expmt	OK	203.663	69.8562	-1.54372	-3.99188	5e-05	0.0101515	yes
XLOC_024636	XLOC_024636	Nexn	3:152236981-152266350	control	expmt	OK	4.24625	1.45849	-1.54171	-1.3163	5e-05	0.0101515	yes
XLOC_008423	XLOC_008423	Fam228b	12:4746215-4769267	control	expmt	OK	2.8491	1.0328	-1.46394	-2.80902	5e-05	0.0101515	yes
XLOC_028573	XLOC_028573	Gm24265	5:115489458-115489599	control	expmt	OK	25100.3	9111.05	-1.46202	-2.22826	0.0003	0.0476069	yes
XLOC_005094	XLOC_005094	Hba-a2	11:32296488-32297298	control	expmt	OK	154.18	57.1333	-1.43221	-4.19484	5e-05	0.0101515	yes
XLOC_042024	XLOC_042024	Cdr1	X:61183245-61185558	control	expmt	OK	144.469	53.6686	-1.42861	-2.45221	0.0002	0.0336732	yes
XLOC_000544	XLOC_000544	Gm25360	1:72226239-72226430	control	expmt	OK	488.214	185.512	-1.396	-3.27175	5e-05	0.0101515	yes
XLOC_035786	XLOC_035786	Hbb-bt	7:103812523-103813996	control	expmt	OK	27.8484	10.6432	-1.38766	-3.21448	5e-05	0.0101515	yes
XLOC_006205	XLOC_006205	Snhg20	11:117076789-117078955	control	expmt	OK	69.3731	27.8459	-1.31691	-2.82203	5e-05	0.0101515	yes
XLOC_017513	XLOC_017513	2410127L17Rik	19:18670779-18704788	control	expmt	OK	4.35116	1.81613	-1.26053	-2.56796	5e-05	0.0101515	yes
XLOC_025009	XLOC_025009	Anp32b	4:46450901-46472657	control	expmt	OK	8.82883	3.83545	-1.20283	-2.5759	5e-05	0.0101515	yes
XLOC_014126	XLOC_014126	Gm21833	16:82828381-82829881	control	expmt	OK	6.67965	2.92917	-1.18928	-2.48999	0.0001	0.0189123	yes
XLOC_014203	XLOC_014203	Gm7976	16:95016369-95067017	control	expmt	OK	5.9483	2.62984	-1.1775	-2.25706	0.00025	0.0406059	yes
XLOC_024339	XLOC_024339	Gpr88	3:116249653-116253503	control	expmt	OK	58.453	25.8751	-1.17571	-2.85522	5e-05	0.0101515	yes
XLOC_002385	XLOC_002385	Ncl	1:86344718-86359400	control	expmt	OK	35.7494	16.2495	-1.13753	-2.11694	0.0001	0.0189123	yes
XLOC_039495	XLOC_039495	Htr1b	9:81628290-81645156	control	expmt	OK	4.07607	1.87091	-1.12344	-2.38312	5e-05	0.0101515	yes
XLOC_011815	XLOC_011815	Prkcd	14:30595355-30626210	control	expmt	OK	6.49646	3.03612	-1.09743	-2.10058	0.00015	0.0268948	yes
XLOC_040973	XLOC_040973	Zxdb	X:94724568-94730187	control	expmt	OK	2.28339	1.07455	-1.08745	-2.55092	5e-05	0.0101515	yes
XLOC_008751	XLOC_008751	Syndig1l	12:84677277-84698807	control	expmt	OK	15.3808	7.28207	-1.07871	-3.00877	5e-05	0.0101515	yes
XLOC_016247	XLOC_016247	Slc5a7	17:54273593-54299034	control	expmt	OK	2.01437	0.973386	-1.04925	-2.24655	0.00015	0.0268948	yes
XLOC_038150	XLOC_038150	Scn4b	9:45138436-45154152	control	expmt	OK	41.8838	21.4978	-0.962199	-2.66728	5e-05	0.0101515	yes
XLOC_026216	XLOC_026216	Pou3f2	4:22482779-22488366	control	expmt	OK	4.01891	2.10886	-0.93034	-2.43089	5e-05	0.0101515	yes
XLOC_038177	XLOC_038177	Drd2	9:49340661-49407214	control	expmt	OK	13.673	7.32803	-0.899828	-2.2948	0.0001	0.0189123	yes
XLOC_003051	XLOC_003051	Pcp4l1	1:171173261-171196268	control	expmt	OK	41.4879	22.263	-0.898045	-2.65403	5e-05	0.0101515	yes
XLOC_027447	XLOC_027447	Tmem88b	4:155781590-155785874	control	expmt	OK	7.95732	4.33261	-0.877045	-2.47537	5e-05	0.0101515	yes
XLOC_006136	XLOC_006136	Sox9	11:112782223-112787760	control	expmt	OK	3.89273	2.12155	-0.875662	-2.20159	0.0003	0.0476069	yes
XLOC_005928	XLOC_005928	Ppp1r1b	11:98348403-98358283	control	expmt	OK	162.914	89.3866	-0.865982	-2.19747	5e-05	0.0101515	yes
XLOC_036613	XLOC_036613	Spock3	8:62951008-63357103	control	expmt	OK	41.7282	23.0676	-0.855152	-2.34348	5e-05	0.0101515	yes
XLOC_021209	XLOC_021209	Ankrd63	2:118699102-118703963	control	expmt	OK	7.75729	4.31232	-0.847088	-2.49297	5e-05	0.0101515	yes
XLOC_009986	XLOC_009986	Actn2	13:12269425-12340760	control	expmt	OK	9.16435	5.18099	-0.822804	-2.24844	5e-05	0.0101515	yes
XLOC_008355	XLOC_008355	Inf2	12:112588783-112615556	control	expmt	OK	23.3219	13.1881	-0.822448	-2.56593	5e-05	0.0101515	yes
XLOC_017925	XLOC_017925	Lrrc10b	19:10455370-10457447	control	expmt	OK	19.2582	10.9869	-0.809682	-2.35695	0.0001	0.0189123	yes
XLOC_036719	XLOC_036719	Rasd2	8:75213943-75224113	control	expmt	OK	40.7952	23.2858	-0.808951	-2.50328	5e-05	0.0101515	yes
XLOC_030748	XLOC_030748	Strip2	6:29917012-29959681	control	expmt	OK	14.1848	8.1685	-0.796207	-2.38613	5e-05	0.0101515	yes
XLOC_009559	XLOC_009559	Id4	13:48044230-48264036	control	expmt	OK	14.7317	8.61726	-0.773624	-2.08142	0.0002	0.0336732	yes
XLOC_007563	XLOC_007563	Rgs9	11:109225354-109298129	control	expmt	OK	43.2464	25.5054	-0.76178	-2.18039	0.00025	0.0406059	yes
XLOC_016687	XLOC_016687	Ap3s1	18:46741916-46790826	control	expmt	OK	19.98	11.8115	-0.758373	-2.14999	0.0002	0.0336732	yes
XLOC_010320	XLOC_010320	Drd1	13:54051185-54055658	control	expmt	OK	21.5812	13.4275	-0.68459	-2.04009	0.00025	0.0406059	yes
XLOC_011346	XLOC_011346	Cpne6	14:55510444-55517431	control	expmt	OK	29.2442	49.7738	0.767235	2.21287	5e-05	0.0101515	yes
XLOC_020437	XLOC_020437	Fibcd1	2:31813289-31846005	control	expmt	OK	2.92524	5.49473	0.909494	2.35536	0.00015	0.0268948	yes
XLOC_006321	XLOC_006321	Cabp7	11:4704677-4746778	control	expmt	OK	8.1628	15.3412	0.910278	2.29395	0.0002	0.0336732	yes
XLOC_027758	XLOC_027758	Fosl2	5:32135800-32157842	control	expmt	OK	4.81164	9.13811	0.925369	2.55721	5e-05	0.0101515	yes
XLOC_012980	XLOC_012980	Nr4a1	15:101266845-101274792	control	expmt	OK	17.3431	32.9719	0.926872	2.79865	5e-05	0.0101515	yes
XLOC_006014	XLOC_006014	Arl4d	11:101665540-101667832	control	expmt	OK	7.98065	15.2695	0.93607	2.45133	0.0001	0.0189123	yes
XLOC_026696	XLOC_026696	Jun	4:95049033-95167318	control	expmt	OK	6.97354	13.5564	0.959008	2.74519	5e-05	0.0101515	yes
XLOC_036754	XLOC_036754	Dnajb1	8:83608174-83611902	control	expmt	OK	18.7294	36.7025	0.970575	2.99929	5e-05	0.0101515	yes
XLOC_037553	XLOC_037553	Junb	8:84976908-84978748	control	expmt	OK	20.6143	41.9355	1.02453	3.15633	5e-05	0.0101515	yes
XLOC_034678	XLOC_034678	Fosb	7:19302720-19310045	control	expmt	OK	2.67561	5.47541	1.0331	2.58357	5e-05	0.0101515	yes
XLOC_016000	XLOC_016000	Hspa1b	17:34956435-34959238	control	expmt	OK	2.98017	6.27505	1.07423	2.5386	5e-05	0.0101515	yes
XLOC_025025	XLOC_025025	Nr4a3	4:48045152-48086447	control	expmt	OK	4.51965	9.77988	1.11361	2.81293	5e-05	0.0101515	yes
XLOC_032672	XLOC_032672	Ccnd2	6:127122965-127212411	control	expmt	OK	11.5007	24.8977	1.1143	2.62599	5e-05	0.0101515	yes
XLOC_015850	XLOC_015850	Dusp1	17:26505589-26508519	control	expmt	OK	9.36853	20.9804	1.16315	2.65552	5e-05	0.0101515	yes
XLOC_003771	XLOC_003771	Gadd45b	10:80930090-80932204	control	expmt	OK	4.17014	9.49491	1.18706	2.60725	5e-05	0.0101515	yes
XLOC_020594	XLOC_020594	Nr4a2	2:57106829-57124003	control	expmt	OK	5.05593	12.0481	1.25275	2.82113	5e-05	0.0101515	yes
XLOC_020732	XLOC_020732	Pde11a	2:75989140-76338774	control	expmt	OK	0.832027	2.11252	1.34426	2.37955	5e-05	0.0101515	yes
XLOC_003893	XLOC_003893	Dcn	10:97479499-97518162	control	expmt	OK	4.76299	12.5624	1.39917	3.4605	5e-05	0.0101515	yes
XLOC_016001	XLOC_016001	Hspa1a	17:34969189-34972156	control	expmt	OK	1.63253	4.64816	1.50955	3.20262	5e-05	0.0101515	yes
XLOC_024600	XLOC_024600	Cyr61	3:145646975-145649981	control	expmt	OK	2.27797	6.57885	1.53008	3.26329	5e-05	0.0101515	yes
XLOC_027167	XLOC_027167	Man1c1	4:134561689-134704290	control	expmt	OK	5.44031	15.7923	1.53746	3.97574	5e-05	0.0101515	yes
XLOC_002697	XLOC_002697	Btg2	1:134075169-134079120	control	expmt	OK	3.85241	11.6507	1.59658	4.12438	5e-05	0.0101515	yes
XLOC_008104	XLOC_008104	Fos	12:85473889-85477273	control	expmt	OK	11.2784	35.7886	1.66594	3.96235	5e-05	0.0101515	yes
XLOC_030685	XLOC_030685	Gm26809	6:18844219-18848207	control	expmt	OK	5.86533	20.1422	1.77993	4.56994	5e-05	0.0101515	yes
XLOC_031674	XLOC_031674	Apold1	6:134982000-134986836	control	expmt	OK	0.939944	3.28311	1.80442	3.53034	5e-05	0.0101515	yes
XLOC_027726	XLOC_027726	Cenpa	5:30666776-30674830	control	expmt	OK	0.435523	1.84048	2.07926	0.980965	0.00015	0.0268948	yes
XLOC_025532	XLOC_025532	Gm12840	4:117700187-117700923	control	expmt	OK	5.38643	25.9733	2.26963	4.41453	5e-05	0.0101515	yes
XLOC_022077	XLOC_022077	Gm27403,Gm27611,Mir1897,RP23-423J10.7,Sox2ot	3:34104269-34682746	control	expmt	OK	11.2057	60.7941	2.4397	2.91606	5e-05	0.0101515	yes
XLOC_006088	XLOC_006088	Snord104	11:106500992-106501062	control	expmt	OK	81289.3	0	#NAME?	#NAME?	5e-05	0.0101515	yes
XLOC_026011	XLOC_026011	n-R5s193	4:149817731-149817840	control	expmt	OK	1315.78	0	#NAME?	#NAME?	5e-05	0.0101515	yes

## Sheet: Male-Hypo DEGs
test_id	gene_id	gene	locus	sample_1	sample_2	status	value_1	value_2	log2(fold_change)	test_stat	p_value	q_value	significant
XLOC_000815	XLOC_000815	Bok	1:93685659-93695764	control_hypo	exp_hypo	OK	20.1913	7.4943	-1.42987	-2.36467	5e-05	0.0188041	yes
XLOC_002398	XLOC_002398	Ecel1	1:87147654-87156521	control_hypo	exp_hypo	OK	5.65565	19.099	1.75573	2.46106	5e-05	0.0188041	yes
XLOC_002697	XLOC_002697	Btg2	1:134075169-134079120	control_hypo	exp_hypo	OK	2.88517	12.1749	2.07718	3.50034	5e-05	0.0188041	yes
XLOC_002875	XLOC_002875	Ier5	1:155096360-155099636	control_hypo	exp_hypo	OK	10.7254	3.25135	-1.72193	-2.74854	5e-05	0.0188041	yes
XLOC_004013	XLOC_004013	Ppm1h	10:122678761-122945795	control_hypo	exp_hypo	OK	758.23	10.1854	-6.21806	-7.40608	5e-05	0.0188041	yes
XLOC_004948	XLOC_004948	Ramp3	11:6650147-6677475	control_hypo	exp_hypo	OK	6.88997	0.740349	-3.21822	-3.12378	5e-05	0.0188041	yes
XLOC_004950	XLOC_004950	Adcy1	11:7063488-7178506	control_hypo	exp_hypo	OK	59.654	13.6519	-2.12752	-2.40556	5e-05	0.0188041	yes
XLOC_005246	XLOC_005246	Col23a1	11:51289919-51583918	control_hypo	exp_hypo	OK	1.34321	4.68925	1.80367	2.50111	5e-05	0.0188041	yes
XLOC_005296	XLOC_005296	Gpx3	11:54902452-54910377	control_hypo	exp_hypo	OK	10.5792	32.5922	1.6233	2.39082	5e-05	0.0188041	yes
XLOC_007309	XLOC_007309	E130012A19Rik	11:97627388-97629702	control_hypo	exp_hypo	OK	5.07235	1.21856	-2.05747	-2.56816	5e-05	0.0188041	yes
XLOC_008104	XLOC_008104	Fos	12:85473889-85477273	control_hypo	exp_hypo	OK	11.3358	38.1932	1.75242	2.65053	5e-05	0.0188041	yes
XLOC_008774	XLOC_008774	Ngb	12:87097530-87102539	control_hypo	exp_hypo	OK	5.59967	19.3579	1.78951	2.53859	5e-05	0.0188041	yes
XLOC_010228	XLOC_010228	Nrn1	13:36725624-36734477	control_hypo	exp_hypo	OK	38.0712	12.9057	-1.56068	-2.44258	5e-05	0.0188041	yes
XLOC_010260	XLOC_010260	Gfod1	13:43195518-43304172	control_hypo	exp_hypo	OK	14.7167	5.66617	-1.37701	-2.43642	5e-05	0.0188041	yes
XLOC_011815	XLOC_011815	Prkcd	14:30595355-30626210	control_hypo	exp_hypo	OK	18.6594	3.38204	-2.46394	-3.0411	5e-05	0.0188041	yes
XLOC_011863	XLOC_011863	Cdhr1	14:37077849-37098311	control_hypo	exp_hypo	OK	0.550093	5.075	3.20566	3.68323	5e-05	0.0188041	yes
XLOC_013363	XLOC_013363	Pvalb	15:78191113-78206400	control_hypo	exp_hypo	OK	33.3784	8.3397	-2.00085	-3.22283	5e-05	0.0188041	yes
XLOC_013788	XLOC_013788	Rtn4r	16:18127641-18152408	control_hypo	exp_hypo	OK	12.9259	3.22606	-2.00242	-2.83804	5e-05	0.0188041	yes
XLOC_014048	XLOC_014048	Abi3bp	16:56477845-56690128	control_hypo	exp_hypo	OK	0.872956	3.96728	2.18417	2.52556	5e-05	0.0188041	yes
XLOC_016522	XLOC_016522	Ttr	18:20558073-20674324	control_hypo	exp_hypo	OK	197.165	7.50472	-4.71546	-4.38533	5e-05	0.0188041	yes
XLOC_017819	XLOC_017819	Npas4	19:4984354-4989971	control_hypo	exp_hypo	OK	2.22125	8.42689	1.92363	3.14013	5e-05	0.0188041	yes
XLOC_019471	XLOC_019471	Itpka	2:119742336-119751263	control_hypo	exp_hypo	OK	28.5568	9.00054	-1.66575	-2.56019	5e-05	0.0188041	yes
XLOC_019583	XLOC_019583	Nop56	2:130274429-130284547	control_hypo	exp_hypo	OK	38201.1	70.0426	-9.09117	-14.396	5e-05	0.0188041	yes
XLOC_022414	XLOC_022414	Dchs2	3:83125275-83357209	control_hypo	exp_hypo	OK	1.00725	3.06887	1.60729	2.56856	5e-05	0.0188041	yes
XLOC_024407	XLOC_024407	Synpo2	3:123076518-123236149	control_hypo	exp_hypo	OK	6.24934	1.41164	-2.14633	-1.85963	5e-05	0.0188041	yes
XLOC_026476	XLOC_026476	Ptpn3	4:57190840-57307305	control_hypo	exp_hypo	OK	11.8076	2.98681	-1.98305	-2.02735	5e-05	0.0188041	yes
XLOC_032465	XLOC_032465	Trh	6:92242060-92244650	control_hypo	exp_hypo	OK	10.0292	37.3708	1.8977	2.61179	5e-05	0.0188041	yes
XLOC_034930	XLOC_034930	Scn1b	7:31116523-31126945	control_hypo	exp_hypo	OK	103.995	43.3199	-1.26342	-2.20817	5e-05	0.0188041	yes
XLOC_038249	XLOC_038249	Sema7a	9:57940112-57962864	control_hypo	exp_hypo	OK	22.8741	7.86636	-1.53995	-2.5846	5e-05	0.0188041	yes
XLOC_038770	XLOC_038770	Mir6236	9:110281286-110281409	control_hypo	exp_hypo	OK	7501.47	62129.2	3.05002	3.56561	5e-05	0.0188041	yes
XLOC_038899	XLOC_038899	Gm26870	9:3000281-3038316	control_hypo	exp_hypo	OK	1.5437	8.16574	2.40319	2.53059	5e-05	0.0188041	yes
XLOC_039051	XLOC_039051	Gm17508	9:31080616-31082475	control_hypo	exp_hypo	OK	0	1.25302	inf	#NAME?	5e-05	0.0188041	yes
XLOC_039107	XLOC_039107	Nrgn	9:37544491-37552904	control_hypo	exp_hypo	OK	132.423	39.4423	-1.74734	-2.45527	5e-05	0.0188041	yes
XLOC_039222	XLOC_039222	Zbtb16	9:48654310-48835945	control_hypo	exp_hypo	OK	9.22905	2.94755	-1.64667	-2.84768	5e-05	0.0188041	yes
XLOC_039873	XLOC_039873	Cck	9:121489824-121495689	control_hypo	exp_hypo	OK	130.798	44.754	-1.54725	-2.39323	5e-05	0.0188041	yes
XLOC_040316	XLOC_040316	Dgkk	X:6779305-6948363	control_hypo	exp_hypo	OK	1.08292	4.1228	1.9287	2.61622	5e-05	0.0188041	yes
XLOC_042357	XLOC_042357	Gm27733,Gm27927,Xist	X:103414466-103484957	control_hypo	exp_hypo	OK	0.147745	17.4375	6.88294	0.388739	5e-05	0.0188041	yes
XLOC_007327	XLOC_007327	Neurod2	11:98325414-98329648	control_hypo	exp_hypo	OK	6.2358	1.53375	-2.02351	-2.49887	0.0001	0.031625	yes
XLOC_015559	XLOC_015559	Tmem178	17:80944631-81001816	control_hypo	exp_hypo	OK	15.9387	5.95669	-1.41995	-2.21533	0.0001	0.031625	yes
XLOC_019591	XLOC_019591	Oxt	2:130576172-130577054	control_hypo	exp_hypo	OK	38.953	153.27	1.97627	2.829	0.0001	0.031625	yes
XLOC_021345	XLOC_021345	Pdyn	2:129686564-129699844	control_hypo	exp_hypo	OK	7.21742	16.7669	1.21606	2.05481	0.0001	0.031625	yes
XLOC_031251	XLOC_031251	Tacr1	6:82402474-82560103	control_hypo	exp_hypo	OK	0.786698	2.55687	1.70049	2.47511	0.0001	0.031625	yes
XLOC_031694	XLOC_031694	Ptpro	6:137252298-137464629	control_hypo	exp_hypo	OK	4.46204	10.4168	1.22314	2.17075	0.0001	0.031625	yes
XLOC_035941	XLOC_035941	Dkk3	7:112116018-112159057	control_hypo	exp_hypo	OK	37.7128	14.9357	-1.33629	-2.27572	0.0001	0.031625	yes
XLOC_006047	XLOC_006047	Rprml	11:103649569-103650579	control_hypo	exp_hypo	OK	12.0462	3.32915	-1.85535	-2.40766	0.00015	0.0425969	yes
XLOC_010602	XLOC_010602	Cartpt	13:99898483-99900683	control_hypo	exp_hypo	OK	9.96586	35.3816	1.82793	2.49313	0.00015	0.0425969	yes
XLOC_012997	XLOC_012997	Igfbp6	15:102144361-102149511	control_hypo	exp_hypo	OK	16.2403	3.56318	-2.18834	-2.76288	0.00015	0.0425969	yes
XLOC_028484	XLOC_028484	Galnt9	5:110544354-110621380	control_hypo	exp_hypo	OK	15.2024	6.08627	-1.32067	-2.33701	0.00015	0.0425969	yes
XLOC_032053	XLOC_032053	Rny1	6:47788068-47788180	control_hypo	exp_hypo	OK	16800.2	3731.07	-2.17081	-2.77073	0.00015	0.0425969	yes

## Sheet: Female-PFC DEGs
test_id	gene_id	gene	locus	sample_1	sample_2	status	value_1	value_2	log2(fold_change)	test_stat	p_value	q_value	significant
XLOC_000016	XLOC_000016	Atp6v1h	1:4909575-5162529	Control_PFC	Experimental_PFC	OK	63.0606	83.8224	0.410597	1.62252	0.00465	0.0237897	yes
XLOC_000017	XLOC_000017	Gm37567	1:5307738-5310017	Control_PFC	Experimental_PFC	OK	1.96749	1.06742	-0.882238	-2.29943	0.0003	0.00221024	yes
XLOC_000019	XLOC_000019	Oprk1	1:5588465-5606131	Control_PFC	Experimental_PFC	OK	1.90366	3.92611	1.04432	3.23889	5e-05	0.000434753	yes
XLOC_000055	XLOC_000055	Cspp1	1:10024600-10136768	Control_PFC	Experimental_PFC	OK	28.6452	18.0308	-0.667831	-1.50062	0.0048	0.0244327	yes
XLOC_000082	XLOC_000082	Kcnb2	1:15287253-15723750	Control_PFC	Experimental_PFC	OK	11.1358	4.61766	-1.26997	-4.07378	5e-05	0.000434753	yes
XLOC_000084	XLOC_000084	Gm37138	1:15287253-15723750	Control_PFC	Experimental_PFC	OK	6.50403	2.86099	-1.18482	-1.71802	0.00355	0.0189337	yes
XLOC_000096	XLOC_000096	Tmem70	1:16665206-16678275	Control_PFC	Experimental_PFC	OK	11.2731	15.7735	0.484618	2.04938	0.0005	0.00348019	yes
XLOC_000106	XLOC_000106	Crispld1	1:17676026-17805417	Control_PFC	Experimental_PFC	OK	2.16712	3.20665	0.565287	1.49975	0.0075	0.0355876	yes
XLOC_000128	XLOC_000128	Tmem14a	1:21218574-21230167	Control_PFC	Experimental_PFC	OK	13.9357	23.0639	0.726852	3.17333	5e-05	0.000434753	yes
XLOC_000154	XLOC_000154	Lmbrd1	1:24678629-24766301	Control_PFC	Experimental_PFC	OK	33.4977	45.0798	0.428416	1.43787	0.00535	0.0267865	yes
XLOC_000184	XLOC_000184	Gm37110	1:32172713-32658568	Control_PFC	Experimental_PFC	OK	27.4748	18.1588	-0.597436	-1.98014	0.0005	0.00348019	yes
XLOC_000189	XLOC_000189	Gm37724	1:33065129-33066350	Control_PFC	Experimental_PFC	OK	14.5164	9.5948	-0.597357	-2.41077	5e-05	0.000434753	yes
XLOC_000212	XLOC_000212	Amer3	1:34579201-34590944	Control_PFC	Experimental_PFC	OK	6.25501	8.44791	0.433582	2.04291	0.0003	0.00221024	yes
XLOC_000237	XLOC_000237	Cox5b	1:36691483-36693681	Control_PFC	Experimental_PFC	OK	249.135	341.738	0.455966	1.77165	0.00255	0.0143003	yes
XLOC_000243	XLOC_000243	Vwa3b	1:37026595-37187613	Control_PFC	Experimental_PFC	OK	0.216979	0.711033	1.71236	0.670622	0.0086	0.0399088	yes
XLOC_000246	XLOC_000246	Unc50	1:37430138-37439124	Control_PFC	Experimental_PFC	OK	18.3378	23.8339	0.378195	1.59678	0.0053	0.0265686	yes
XLOC_000267	XLOC_000267	Npas2	1:39193730-39363236	Control_PFC	Experimental_PFC	OK	9.58853	19.3379	1.01205	2.56801	5e-05	0.000434753	yes
XLOC_000277	XLOC_000277	Gm38070	1:40225079-40317257	Control_PFC	Experimental_PFC	OK	0.934068	0.561201	-0.735011	-1.78188	0.002	0.0116276	yes
XLOC_000284	XLOC_000284	Slc9a2	1:40680573-40769273	Control_PFC	Experimental_PFC	OK	1.31787	0.86523	-0.607053	-1.60576	0.0047	0.0239971	yes
XLOC_000352	XLOC_000352	4933411E06Rik	1:50107469-50108962	Control_PFC	Experimental_PFC	OK	3.60392	2.20099	-0.711413	-1.98674	0.00045	0.00317388	yes
XLOC_000360	XLOC_000360	Gm29325	1:51195220-51197748	Control_PFC	Experimental_PFC	OK	0.849117	0.380778	-1.15701	-2.24546	0.00065	0.00438462	yes
XLOC_000381	XLOC_000381	Coq10b	1:55051318-55072702	Control_PFC	Experimental_PFC	OK	12.3126	15.6025	0.341642	1.52072	0.00745	0.0353851	yes
XLOC_000411	XLOC_000411	Ndufb3	1:58586383-58595964	Control_PFC	Experimental_PFC	OK	39.1465	49.2453	0.331101	1.56267	0.00705	0.0337776	yes
XLOC_000474	XLOC_000474	Nrp2	1:62703284-62818695	Control_PFC	Experimental_PFC	OK	7.55919	4.12569	-0.873595	-3.8068	5e-05	0.000434753	yes
XLOC_000544	XLOC_000544	Gm25360	1:72226239-72226430	Control_PFC	Experimental_PFC	OK	343.963	1088.32	1.66177	7.44449	5e-05	0.000434753	yes
XLOC_000548	XLOC_000548	Gm25939	1:72236464-72284314	Control_PFC	Experimental_PFC	OK	5257.25	13556.1	1.36656	5.01612	5e-05	0.000434753	yes
XLOC_000553	XLOC_000553	Rpl37a	1:72711259-72713809	Control_PFC	Experimental_PFC	OK	201.176	319.497	0.667346	3.11427	5e-05	0.000434753	yes
XLOC_000568	XLOC_000568	Pnkd	1:74284929-74353694	Control_PFC	Experimental_PFC	OK	40.2196	62.9806	0.64701	1.655	0.0042	0.0218178	yes
XLOC_000584	XLOC_000584	Wnt10a	1:74791515-74804179	Control_PFC	Experimental_PFC	OK	3.69906	5.08382	0.458755	1.68736	0.0027	0.0150118	yes
XLOC_000586	XLOC_000586	Cdk5r2	1:74850894-74879953	Control_PFC	Experimental_PFC	OK	30.4996	39.3618	0.368003	1.73424	0.0021	0.0121275	yes
XLOC_000599	XLOC_000599	Asic4	1:75450435-75474343	Control_PFC	Experimental_PFC	OK	4.97776	9.58997	0.946029	3.91856	5e-05	0.000434753	yes
XLOC_000600	XLOC_000600	Tmem198	1:75474568-75506452	Control_PFC	Experimental_PFC	OK	22.8387	34.1709	0.581286	1.47582	0.00705	0.0337776	yes
XLOC_000601	XLOC_000601	Inha	1:75507076-75510366	Control_PFC	Experimental_PFC	OK	8.21781	6.07208	-0.436563	-1.62488	0.0052	0.0261449	yes
XLOC_000636	XLOC_000636	Gm9747	1:82233100-82291416	Control_PFC	Experimental_PFC	OK	7.74293	4.78132	-0.695469	-1.78423	0.0019	0.0111185	yes
XLOC_000697	XLOC_000697	Gm29055	1:86703807-87057596	Control_PFC	Experimental_PFC	OK	52.2041	30.1846	-0.790349	-2.82822	5e-05	0.000434753	yes
XLOC_000709	XLOC_000709	Prss56	1:87183312-87188405	Control_PFC	Experimental_PFC	OK	0.993901	0.404316	-1.29762	-2.39358	0.0002	0.00154481	yes
XLOC_000715	XLOC_000715	Gigyf2	1:87326997-87450796	Control_PFC	Experimental_PFC	OK	43.275	73.7629	0.769362	2.22059	5e-05	0.000434753	yes
XLOC_000721	XLOC_000721	Gm25395	1:87755869-87792428	Control_PFC	Experimental_PFC	OK	1308.62	5459.03	2.0606	5.67116	5e-05	0.000434753	yes
XLOC_000722	XLOC_000722	Scarna6	1:87755869-87792428	Control_PFC	Experimental_PFC	OK	345.793	1075.5	1.63703	1.95556	0.0032	0.0173398	yes
XLOC_000750	XLOC_000750	Sh3bp4	1:89070414-89155068	Control_PFC	Experimental_PFC	OK	4.52989	2.91219	-0.637371	-1.6719	0.0015	0.00906687	yes
XLOC_000751	XLOC_000751	Gm38312	1:89070414-89155068	Control_PFC	Experimental_PFC	OK	16.044	11.1832	-0.520699	-1.74642	0.0024	0.0135779	yes
XLOC_000770	XLOC_000770	Ramp1	1:91179821-91225196	Control_PFC	Experimental_PFC	OK	14.3071	28.8674	1.01271	4.47562	5e-05	0.000434753	yes
XLOC_000775	XLOC_000775	Klhl30	1:91351015-91362416	Control_PFC	Experimental_PFC	OK	1.22859	0.0489757	-4.6488	-3.82478	0.00265	0.0147724	yes
XLOC_000796	XLOC_000796	Dusp28	1:92906980-92910764	Control_PFC	Experimental_PFC	OK	9.84469	13.9838	0.506339	1.91717	0.00155	0.00932883	yes
XLOC_000815	XLOC_000815	Bok	1:93685659-93695764	Control_PFC	Experimental_PFC	OK	18.1835	29.6461	0.705214	3.23408	5e-05	0.000434753	yes
XLOC_000875	XLOC_000875	Gm38031	1:104768528-104995481	Control_PFC	Experimental_PFC	OK	2.15192	0.888952	-1.27544	-2.10322	0.00045	0.00317388	yes
XLOC_000926	XLOC_000926	Gm28362	1:117662290-117678373	Control_PFC	Experimental_PFC	OK	0.817867	0.400376	-1.03051	-1.95587	0.00205	0.0118768	yes
XLOC_000943	XLOC_000943	Tfcp2l1	1:118627944-118685168	Control_PFC	Experimental_PFC	OK	5.4725	2.37467	-1.20447	-2.27642	0.00535	0.0267865	yes
XLOC_001050	XLOC_001050	Lemd1	1:132191430-132259227	Control_PFC	Experimental_PFC	OK	3.30818	1.99652	-0.728547	-1.40089	0.00915	0.042016	yes
XLOC_001076	XLOC_001076	Fmod	1:134037253-134048277	Control_PFC	Experimental_PFC	OK	4.00111	1.9194	-1.05974	-3.34929	5e-05	0.000434753	yes
XLOC_001097	XLOC_001097	Ptpn7	1:135132699-135145317	Control_PFC	Experimental_PFC	OK	0.227725	0.792786	1.79964	2.68202	5e-05	0.000434753	yes
XLOC_001105	XLOC_001105	Phlda3	1:135766118-135769136	Control_PFC	Experimental_PFC	OK	6.86614	10.0178	0.544995	1.82509	0.00215	0.0123726	yes
XLOC_001132	XLOC_001132	Gm37298	1:137898594-138000384	Control_PFC	Experimental_PFC	OK	5.30643	2.52583	-1.07098	-2.36832	0.00015	0.00118995	yes
XLOC_001136	XLOC_001136	D130019J16Rik	1:137898594-138000384	Control_PFC	Experimental_PFC	OK	5.51896	2.58995	-1.09147	-1.76889	0.0035	0.0187064	yes
XLOC_001137	XLOC_001137	Gm37534	1:137898594-138000384	Control_PFC	Experimental_PFC	OK	4.31433	2.47978	-0.798926	-1.95644	0.0008	0.00525136	yes
XLOC_001145	XLOC_001145	Dennd1b	1:138963434-139178960	Control_PFC	Experimental_PFC	OK	29.6665	86.0371	1.53613	3.83075	5e-05	0.000434753	yes
XLOC_001160	XLOC_001160	Kcnt2	1:140246157-140656404	Control_PFC	Experimental_PFC	OK	18.4753	27.8704	0.59314	2.55371	5e-05	0.000434753	yes
XLOC_001200	XLOC_001200	Ivns1abp	1:151339603-151364422	Control_PFC	Experimental_PFC	OK	43.7706	57.2331	0.386888	1.62321	0.00295	0.0161704	yes
XLOC_001211	XLOC_001211	Arpc5	1:152766541-152775597	Control_PFC	Experimental_PFC	OK	25.2619	31.8741	0.33542	1.54043	0.0054	0.0269987	yes
XLOC_001219	XLOC_001219	Rgs8	1:153653024-153700323	Control_PFC	Experimental_PFC	OK	17.9483	27.6158	0.621646	1.71405	0.0014	0.00853755	yes
XLOC_001249	XLOC_001249	Abl2	1:156558785-156649568	Control_PFC	Experimental_PFC	OK	18.3567	13.3237	-0.46231	-1.36869	0.00985	0.0447019	yes
XLOC_001269	XLOC_001269	Scarna3a,mmu-mir-1843b	1:159232319-159347640	Control_PFC	Experimental_PFC	OK	272.335	1211.24	2.15303	2.23467	0.00235	0.0133425	yes
XLOC_001343	XLOC_001343	Mpc2	1:165460636-165481214	Control_PFC	Experimental_PFC	OK	47.8029	65.8527	0.462145	1.76663	0.0025	0.0140585	yes
XLOC_001368	XLOC_001368	Rxrg	1:167598383-167639623	Control_PFC	Experimental_PFC	OK	4.18669	11.5337	1.46197	5.5912	5e-05	0.000434753	yes
XLOC_001426	XLOC_001426	Kcnj10	1:172341209-172374085	Control_PFC	Experimental_PFC	OK	41.0193	30.6057	-0.422502	-1.89169	0.001	0.00637663	yes
XLOC_001489	XLOC_001489	Zbtb18	1:177428337-177450764	Control_PFC	Experimental_PFC	OK	64.6822	90.4782	0.484202	1.75649	0.002	0.0116276	yes
XLOC_001528	XLOC_001528	Pycr2	1:180904292-180908088	Control_PFC	Experimental_PFC	OK	10.4696	14.9973	0.518497	2.20752	0.00015	0.00118995	yes
XLOC_001531	XLOC_001531	Gm37086	1:181026277-181029729	Control_PFC	Experimental_PFC	OK	2.57394	1.80557	-0.511528	-1.7408	0.00325	0.0175643	yes
XLOC_001547	XLOC_001547	Trp53bp2	1:182409171-182462432	Control_PFC	Experimental_PFC	OK	6.25529	3.72061	-0.74954	-2.63241	0.0001	0.000825347	yes
XLOC_001600	XLOC_001600	Gpatch2	1:187215507-187377469	Control_PFC	Experimental_PFC	OK	8.7234	6.54594	-0.414291	-1.52105	0.0075	0.0355876	yes
XLOC_001612	XLOC_001612	Ptpn14	1:189728267-189876695	Control_PFC	Experimental_PFC	OK	3.40328	1.3049	-1.38299	-3.31483	5e-05	0.000434753	yes
XLOC_001643	XLOC_001643	Kcnh1	1:192190773-192771223	Control_PFC	Experimental_PFC	OK	21.6419	27.4507	0.343016	1.53118	0.008	0.0375716	yes
XLOC_001671	XLOC_001671	Gm38194	1:195321282-195323493	Control_PFC	Experimental_PFC	OK	119.078	91.6973	-0.376951	-1.65464	0.0037	0.019607	yes
XLOC_001712	XLOC_001712	Sntg1	1:8361474-9299878	Control_PFC	Experimental_PFC	OK	24.5162	35.8908	0.549877	2.01846	0.00025	0.00188079	yes
XLOC_001740	XLOC_001740	Cpa6	1:10324719-10719945	Control_PFC	Experimental_PFC	OK	6.21808	0.505338	-3.62115	-5.66961	5e-05	0.000434753	yes
XLOC_001750	XLOC_001750	Slco5a1	1:12866548-12992650	Control_PFC	Experimental_PFC	OK	3.63121	0.78575	-2.20831	-5.46035	5e-05	0.000434753	yes
XLOC_001780	XLOC_001780	Rpl7	1:16101294-16104662	Control_PFC	Experimental_PFC	OK	138.871	173.721	0.323025	1.46806	0.01095	0.0488648	yes
XLOC_001782	XLOC_001782	Stau2	1:16228505-16520112	Control_PFC	Experimental_PFC	OK	61.2788	96.4329	0.654136	1.71174	0.00305	0.0166423	yes
XLOC_001834	XLOC_001834	Sdhaf4	1:23995938-24005894	Control_PFC	Experimental_PFC	OK	13.2652	18.3855	0.470924	1.68039	0.00375	0.0198305	yes
XLOC_001835	XLOC_001835	Fam135a	1:24011092-24100341	Control_PFC	Experimental_PFC	OK	12.4782	9.06054	-0.461741	-1.73812	0.0015	0.00906687	yes
XLOC_001911	XLOC_001911	Bend6	1:33852051-33907816	Control_PFC	Experimental_PFC	OK	32.7641	43.2245	0.399733	1.81018	0.0012	0.00747245	yes
XLOC_001953	XLOC_001953	Tmem131	1:36792190-36943666	Control_PFC	Experimental_PFC	OK	17.9607	13.3296	-0.430216	-1.47338	0.0063	0.0307574	yes
XLOC_002003	XLOC_002003	Pantr1	1:42590781-42694842	Control_PFC	Experimental_PFC	OK	43.0452	58.0066	0.430367	1.7896	0.00175	0.01035	yes
XLOC_002007	XLOC_002007	Fhl2	1:43123073-43196984	Control_PFC	Experimental_PFC	OK	18.3731	22.7634	0.30912	1.46112	0.0094	0.0429841	yes
XLOC_002011	XLOC_002011	Uxs1	1:43746965-43827800	Control_PFC	Experimental_PFC	OK	28.5024	43.604	0.613379	2.05793	0.00035	0.00253699	yes
XLOC_002023	XLOC_002023	Col5a2	1:45374320-45503282	Control_PFC	Experimental_PFC	OK	1.59622	0.57659	-1.46904	-1.77926	5e-05	0.000434753	yes
XLOC_002075	XLOC_002075	Gm37242	1:52653807-52655892	Control_PFC	Experimental_PFC	OK	1.49359	0.960873	-0.636364	-1.51495	0.00925	0.0423983	yes
XLOC_002082	XLOC_002082	Pms1	1:53189186-53297018	Control_PFC	Experimental_PFC	OK	15.5053	27.1802	0.809793	2.70537	5e-05	0.000434753	yes
XLOC_002103	XLOC_002103	Rftn2	1:55170158-55235622	Control_PFC	Experimental_PFC	OK	6.62892	5.05011	-0.392459	-1.56752	0.00475	0.024221	yes
XLOC_002118	XLOC_002118	Gm37373	1:57520830-57523642	Control_PFC	Experimental_PFC	OK	1.03519	0.510565	-1.01973	-2.24734	0.00025	0.00188079	yes
XLOC_002125	XLOC_002125	Clk1	1:58410188-58424066	Control_PFC	Experimental_PFC	OK	78.916	51.2398	-0.623052	-2.27064	0.00015	0.00118995	yes
XLOC_002191	XLOC_002191	Rpl10a-ps1	1:64993950-64994604	Control_PFC	Experimental_PFC	OK	1.68338	3.43359	1.02836	1.91241	0.00215	0.0123726	yes
XLOC_002218	XLOC_002218	Lancl1	1:67000516-67038872	Control_PFC	Experimental_PFC	OK	57.2388	96.8997	0.759498	2.82123	5e-05	0.000434753	yes
XLOC_002243	XLOC_002243	Fn1	1:71585519-71662843	Control_PFC	Experimental_PFC	OK	17.7436	8.97641	-0.98309	-2.64755	5e-05	0.000434753	yes
XLOC_002255	XLOC_002255	Igfbp5	1:72857931-72874884	Control_PFC	Experimental_PFC	OK	19.7923	15.2942	-0.371949	-1.74461	0.00215	0.0123726	yes
XLOC_002282	XLOC_002282	Nhej1	1:74967138-75046639	Control_PFC	Experimental_PFC	OK	1.20166	2.59684	1.11172	2.27177	0.0004	0.00285605	yes
XLOC_002288	XLOC_002288	Tuba4a	1:75210837-75219865	Control_PFC	Experimental_PFC	OK	221.325	346.805	0.647962	2.03779	0.00035	0.00253699	yes
XLOC_002292	XLOC_002292	Dnpep	1:75307895-75317990	Control_PFC	Experimental_PFC	OK	20.0968	32.2638	0.682953	2.37465	5e-05	0.000434753	yes
XLOC_002317	XLOC_002317	Ap1s3	1:79606875-79671972	Control_PFC	Experimental_PFC	OK	10.8416	6.39885	-0.760688	-3.22784	5e-05	0.000434753	yes
XLOC_002328	XLOC_002328	Dock10	1:80501072-80758527	Control_PFC	Experimental_PFC	OK	19.2381	11.8361	-0.700765	-2.57147	5e-05	0.000434753	yes
XLOC_002336	XLOC_002336	Irs1	1:82233100-82291416	Control_PFC	Experimental_PFC	OK	5.00931	3.0255	-0.727437	-2.77601	5e-05	0.000434753	yes
XLOC_002355	XLOC_002355	Pid1	1:84036295-84364180	Control_PFC	Experimental_PFC	OK	22.9964	14.4267	-0.67267	-2.56826	0.0001	0.000825347	yes
XLOC_002358	XLOC_002358	Dner	1:84369838-84696221	Control_PFC	Experimental_PFC	OK	41.9044	30.6859	-0.449524	-1.50269	0.01	0.0452649	yes
XLOC_002398	XLOC_002398	Ecel1	1:87147654-87156521	Control_PFC	Experimental_PFC	OK	1.29276	2.67189	1.0474	1.78914	0.0005	0.00348019	yes
XLOC_002403	XLOC_002403	Ngef	1:87476833-87597845	Control_PFC	Experimental_PFC	OK	91.3505	147.444	0.690682	2.71881	5e-05	0.000434753	yes
XLOC_002425	XLOC_002425	Gm28722	1:90453393-90454501	Control_PFC	Experimental_PFC	OK	0.904245	0.291053	-1.63543	-1.76416	0.00705	0.0337776	yes
XLOC_002450	XLOC_002450	Myeov2	1:92637144-92641985	Control_PFC	Experimental_PFC	OK	84.9169	168.537	0.988945	4.59365	5e-05	0.000434753	yes
XLOC_002549	XLOC_002549	Dsel	1:111858701-111864918	Control_PFC	Experimental_PFC	OK	5.44701	8.98432	0.721944	2.3101	0.00035	0.00253699	yes
XLOC_002583	XLOC_002583	Tmem37	1:120067376-120074074	Control_PFC	Experimental_PFC	OK	0.702449	1.31533	0.90496	1.64924	0.00705	0.0337776	yes
XLOC_002638	XLOC_002638	Cxcr4	1:128588198-128592293	Control_PFC	Experimental_PFC	OK	1.81449	0.674218	-1.42827	-1.92745	0.0001	0.000825347	yes
XLOC_002639	XLOC_002639	Gm26686	1:128770598-128774421	Control_PFC	Experimental_PFC	OK	3.61252	2.30871	-0.64592	-2.40506	5e-05	0.000434753	yes
XLOC_002695	XLOC_002695	Prelp	1:133897198-133921414	Control_PFC	Experimental_PFC	OK	2.14031	1.35227	-0.66244	-1.96604	0.0007	0.00467802	yes
XLOC_002697	XLOC_002697	Btg2	1:134075169-134079120	Control_PFC	Experimental_PFC	OK	7.27355	5.27338	-0.463932	-1.99191	0.001	0.00637663	yes
XLOC_002699	XLOC_002699	Adora1	1:134193447-134235431	Control_PFC	Experimental_PFC	OK	29.2941	42.6813	0.542996	1.75618	0.0033	0.0177984	yes
XLOC_002706	XLOC_002706	Ppp1r12b	1:134646676-134955942	Control_PFC	Experimental_PFC	OK	38.5878	24.5965	-0.649695	-1.84883	0.0006	0.00409089	yes
XLOC_002709	XLOC_002709	Lgr6	1:134983300-135105276	Control_PFC	Experimental_PFC	OK	5.27432	0.620952	-3.08643	-5.31062	5e-05	0.000434753	yes
XLOC_002746	XLOC_002746	Gm37903	1:137528849-137531230	Control_PFC	Experimental_PFC	OK	15.6459	9.41791	-0.732302	-3.40261	5e-05	0.000434753	yes
XLOC_002786	XLOC_002786	Rgs2	1:143999337-144004161	Control_PFC	Experimental_PFC	OK	17.0352	41.524	1.28543	4.03941	5e-05	0.000434753	yes
XLOC_002857	XLOC_002857	Npl	1:153503014-153550045	Control_PFC	Experimental_PFC	OK	1.54523	2.30254	0.57541	1.48168	0.0096	0.0437389	yes
XLOC_002875	XLOC_002875	Ier5	1:155096360-155099636	Control_PFC	Experimental_PFC	OK	22.8429	37.2928	0.70715	3.30966	5e-05	0.000434753	yes
XLOC_002886	XLOC_002886	Fam163a	1:156075965-156205026	Control_PFC	Experimental_PFC	OK	1.74088	0.428818	-2.02138	-5.01737	5e-05	0.000434753	yes
XLOC_002943	XLOC_002943	Gm37357	1:161811044-161814167	Control_PFC	Experimental_PFC	OK	5.6381	3.67502	-0.617457	-2.51743	5e-05	0.000434753	yes
XLOC_002954	XLOC_002954	Fmo1	1:162829560-162866610	Control_PFC	Experimental_PFC	OK	15.4057	8.13275	-0.921646	-3.55752	5e-05	0.000434753	yes
XLOC_003016	XLOC_003016	Mgst3	1:167371965-167393841	Control_PFC	Experimental_PFC	OK	44.0985	64.7926	0.555099	2.60369	5e-05	0.000434753	yes
XLOC_003018	XLOC_003018	Pbx1	1:168004138-168432270	Control_PFC	Experimental_PFC	OK	44.5738	24.7906	-0.846404	-3.12953	5e-05	0.000434753	yes
XLOC_003028	XLOC_003028	Rgs4	1:169741476-169747642	Control_PFC	Experimental_PFC	OK	109.806	172.132	0.648563	2.47457	5e-05	0.000434753	yes
XLOC_003051	XLOC_003051	Pcp4l1	1:171173261-171196268	Control_PFC	Experimental_PFC	OK	68.1469	52.8337	-0.367191	-1.70392	0.00325	0.0175643	yes
XLOC_003052	XLOC_003052	Tomm40l	1:171213969-171222514	Control_PFC	Experimental_PFC	OK	20.3713	33.7485	0.728288	2.33539	0.0001	0.000825347	yes
XLOC_003054	XLOC_003054	Ndufs2	1:171234852-171260637	Control_PFC	Experimental_PFC	OK	73.1472	100.551	0.459053	1.92288	0.0011	0.00692755	yes
XLOC_003057	XLOC_003057	Ufc1	1:171288562-171295024	Control_PFC	Experimental_PFC	OK	32.7506	49.0137	0.581665	2.72605	5e-05	0.000434753	yes
XLOC_003059	XLOC_003059	Gm20045	1:171320600-171326177	Control_PFC	Experimental_PFC	OK	1.33544	0.81083	-0.719849	-2.28162	0.0003	0.00221024	yes
XLOC_003119	XLOC_003119	Grem2	1:174833784-174921819	Control_PFC	Experimental_PFC	OK	4.48913	5.92123	0.39946	1.76633	0.0027	0.0150118	yes
XLOC_003133	XLOC_003133	Cep170	1:176733652-176814067	Control_PFC	Experimental_PFC	OK	31.8902	18.8324	-0.759897	-1.81084	0.0019	0.0111185	yes
XLOC_003150	XLOC_003150	Adss	1:177762961-177796511	Control_PFC	Experimental_PFC	OK	20.1011	25.8576	0.363314	1.68901	0.0042	0.0218178	yes
XLOC_003180	XLOC_003180	Nvl	1:181087137-181144204	Control_PFC	Experimental_PFC	OK	21.8089	15.1451	-0.526067	-1.58937	0.00555	0.0276319	yes
XLOC_003248	XLOC_003248	Kcnk2	1:189207929-189402273	Control_PFC	Experimental_PFC	OK	12.0144	20.3633	0.761209	2.75781	5e-05	0.000434753	yes
XLOC_003259	XLOC_003259	Rps6kc1	1:190700201-190911770	Control_PFC	Experimental_PFC	OK	59.1184	97.0191	0.714663	1.69962	0.00335	0.0180342	yes
XLOC_003260	XLOC_003260	Vash2	1:190947645-190979296	Control_PFC	Experimental_PFC	OK	1.28097	0.737296	-0.796923	-1.55636	0.002	0.0116276	yes
XLOC_003267	XLOC_003267	Atf3	1:191170295-191218039	Control_PFC	Experimental_PFC	OK	1.0405	0.449443	-1.21107	-1.24035	0.0048	0.0244327	yes
XLOC_003268	XLOC_003268	Nenf	1:191306788-191318194	Control_PFC	Experimental_PFC	OK	39.3517	74.7986	0.926586	4.29141	5e-05	0.000434753	yes
XLOC_003282	XLOC_003282	Rcor3	1:191997204-192151026	Control_PFC	Experimental_PFC	OK	14.0638	9.43744	-0.575515	-1.74189	0.00155	0.00932883	yes
XLOC_003292	XLOC_003292	Hsd11b1	1:193203037-193343878	Control_PFC	Experimental_PFC	OK	2.65249	4.46613	0.75168	1.49925	0.004	0.0209331	yes
XLOC_003296	XLOC_003296	Camk1g	1:193346345-193370298	Control_PFC	Experimental_PFC	OK	13.5364	17.7182	0.388385	1.76546	0.0021	0.0121275	yes
XLOC_003311	XLOC_003311	Ppp1r14c	10:3364072-3464975	Control_PFC	Experimental_PFC	OK	4.39785	3.18569	-0.465192	-1.69958	0.00285	0.015712	yes
XLOC_003315	XLOC_003315	Mthfd1l	10:3973117-4167081	Control_PFC	Experimental_PFC	OK	4.9279	7.61258	0.627412	2.03361	0.00055	0.00378661	yes
XLOC_003319	XLOC_003319	Akap12	10:4266328-4359468	Control_PFC	Experimental_PFC	OK	6.54696	4.79843	-0.448262	-2.12295	0.00035	0.00253699	yes
XLOC_003320	XLOC_003320	Gm21781	10:4391586-4396424	Control_PFC	Experimental_PFC	OK	3.6275	2.47541	-0.551306	-2.28838	0.00015	0.00118995	yes
XLOC_003326	XLOC_003326	Gm10097	10:5069191-5071975	Control_PFC	Experimental_PFC	OK	1.92795	1.08992	-0.822843	-2.30053	0.00025	0.00188079	yes
XLOC_003332	XLOC_003332	Lrp11	10:7589799-7625483	Control_PFC	Experimental_PFC	OK	42.6868	57.3519	0.426049	1.46985	0.0112	0.0497926	yes
XLOC_003334	XLOC_003334	Lats1	10:7681208-7716458	Control_PFC	Experimental_PFC	OK	9.29985	7.04188	-0.401248	-1.78176	0.0023	0.0130957	yes
XLOC_003349	XLOC_003349	Fbxo30	10:11281329-11298052	Control_PFC	Experimental_PFC	OK	4.68932	3.30908	-0.50295	-1.79738	0.00175	0.01035	yes
XLOC_003357	XLOC_003357	Sf3b5	10:13005342-13009183	Control_PFC	Experimental_PFC	OK	3.51569	6.73088	0.936988	4.07003	5e-05	0.000434753	yes
XLOC_003366	XLOC_003366	Nmbr	10:14705590-14770850	Control_PFC	Experimental_PFC	OK	2.61889	0.735034	-1.83307	-2.21418	5e-05	0.000434753	yes
XLOC_003369	XLOC_003369	Cited2	10:17723227-17725673	Control_PFC	Experimental_PFC	OK	10.1682	7.48071	-0.442823	-1.88424	0.00115	0.00719815	yes
XLOC_003376	XLOC_003376	Perp	10:18845070-18857073	Control_PFC	Experimental_PFC	OK	2.85295	1.90364	-0.583693	-1.67964	0.0039	0.0204924	yes
XLOC_003383	XLOC_003383	Map3k5	10:19934471-20142753	Control_PFC	Experimental_PFC	OK	13.7082	18.2849	0.415615	1.40295	0.00295	0.0161704	yes
XLOC_003397	XLOC_003397	Sgk1	10:21882183-21999903	Control_PFC	Experimental_PFC	OK	20.7503	28.7996	0.472912	1.65888	0.0027	0.0150118	yes
XLOC_003429	XLOC_003429	Ctgf	10:24549440-24598683	Control_PFC	Experimental_PFC	OK	6.9799	10.2192	0.550007	2.28896	5e-05	0.000434753	yes
XLOC_003464	XLOC_003464	Hs3st5	10:36506813-36834397	Control_PFC	Experimental_PFC	OK	5.77154	4.10544	-0.491421	-1.57487	0.0064	0.0311599	yes
XLOC_003472	XLOC_003472	Lama4	10:38965514-39110188	Control_PFC	Experimental_PFC	OK	2.4971	1.69583	-0.558263	-1.59839	0.00235	0.0133425	yes
XLOC_003476	XLOC_003476	Rev3l	10:39732117-39875211	Control_PFC	Experimental_PFC	OK	13.3408	8.15048	-0.710886	-1.71901	0.0001	0.000825347	yes
XLOC_003481	XLOC_003481	Rnu3a	10:40258466-40258680	Control_PFC	Experimental_PFC	OK	825.454	4115.97	2.31797	10.3728	5e-05	0.000434753	yes
XLOC_003484	XLOC_003484	Ddo	10:40630010-40649931	Control_PFC	Experimental_PFC	OK	1.585	0.989885	-0.679148	-1.86326	0.002	0.0116276	yes
XLOC_003485	XLOC_003485	Mettl24	10:40683281-40811083	Control_PFC	Experimental_PFC	OK	0.960026	1.81201	0.916442	1.98746	0.00115	0.00719815	yes
XLOC_003513	XLOC_003513	Cd24a	10:43579168-43584262	Control_PFC	Experimental_PFC	OK	5.93835	2.25427	-1.3974	-4.44025	5e-05	0.000434753	yes
XLOC_003519	XLOC_003519	Atg5	10:44268357-44364291	Control_PFC	Experimental_PFC	OK	7.08481	9.54456	0.429949	1.89516	0.0012	0.00747245	yes
XLOC_003529	XLOC_003529	Hace1	10:45577828-45712345	Control_PFC	Experimental_PFC	OK	18.7035	34.2105	0.87113	2.05687	0.00045	0.00317388	yes
XLOC_003552	XLOC_003552	Gja1	10:56377299-56390419	Control_PFC	Experimental_PFC	OK	48.4177	34.7073	-0.480296	-2.23501	0.00015	0.00118995	yes
XLOC_003560	XLOC_003560	Fabp7	10:57784880-57788450	Control_PFC	Experimental_PFC	OK	51.9546	13.3539	-1.95999	-7.76635	5e-05	0.000434753	yes
XLOC_003596	XLOC_003596	Ppa1	10:61648551-61674168	Control_PFC	Experimental_PFC	OK	34.8498	47.3477	0.442146	2.0225	0.0005	0.00348019	yes
XLOC_003598	XLOC_003598	Tysnd1	10:61695513-61702773	Control_PFC	Experimental_PFC	OK	4.89013	6.45449	0.400429	1.59924	0.00605	0.0297195	yes
XLOC_003627	XLOC_003627	Egr2	10:67535474-67542188	Control_PFC	Experimental_PFC	OK	5.2355	7.46284	0.511397	1.73918	0.00105	0.00665123	yes
XLOC_003647	XLOC_003647	Pcdh15	10:73099341-74649737	Control_PFC	Experimental_PFC	OK	10.9653	7.02967	-0.641409	-1.889	0.0002	0.00154481	yes
XLOC_003650	XLOC_003650	Gnaz	10:74957476-75032586	Control_PFC	Experimental_PFC	OK	27.5947	35.9912	0.383255	1.60686	0.0055	0.0274201	yes
XLOC_003652	XLOC_003652	Bcr	10:75060895-75184923	Control_PFC	Experimental_PFC	OK	23.136	29.0918	0.33047	1.49501	0.0082	0.0383333	yes
XLOC_003654	XLOC_003654	Adora2a	10:75316942-75334788	Control_PFC	Experimental_PFC	OK	5.78837	23.359	2.01275	7.88065	5e-05	0.000434753	yes
XLOC_003661	XLOC_003661	Chchd10	10:75935572-75940672	Control_PFC	Experimental_PFC	OK	91.4076	137.101	0.584851	2.74463	5e-05	0.000434753	yes
XLOC_003715	XLOC_003715	Tpgs1	10:79669409-79676126	Control_PFC	Experimental_PFC	OK	16.8399	27.1654	0.689888	3.09292	5e-05	0.000434753	yes
XLOC_003716	XLOC_003716	Cdc34	10:79682194-79688394	Control_PFC	Experimental_PFC	OK	22.7193	30.0291	0.402446	1.8711	0.00115	0.00719815	yes
XLOC_003718	XLOC_003718	Bsg	10:79704490-79711969	Control_PFC	Experimental_PFC	OK	186.37	245.619	0.398255	1.74173	0.00345	0.0184791	yes
XLOC_003719	XLOC_003719	Hcn2	10:79716633-79736108	Control_PFC	Experimental_PFC	OK	25.2184	31.2578	0.30974	1.47294	0.0097	0.0441209	yes
XLOC_003733	XLOC_003733	Wdr18	10:79960151-79969246	Control_PFC	Experimental_PFC	OK	14.0099	20.249	0.531402	2.48566	5e-05	0.000434753	yes
XLOC_003739	XLOC_003739	Gpx4	10:80047165-80056439	Control_PFC	Experimental_PFC	OK	184.857	348.208	0.91354	3.96422	5e-05	0.000434753	yes
XLOC_003743	XLOC_003743	Cirbp	10:80165984-80172786	Control_PFC	Experimental_PFC	OK	26.3951	16.1864	-0.705493	-2.68772	5e-05	0.000434753	yes
XLOC_003747	XLOC_003747	Ndufs7	10:80249120-80256794	Control_PFC	Experimental_PFC	OK	68.8375	96.8647	0.492776	2.30036	5e-05	0.000434753	yes
XLOC_003750	XLOC_003750	Rps15	10:80292452-80294114	Control_PFC	Experimental_PFC	OK	420.422	634.612	0.594036	2.66811	5e-05	0.000434753	yes
XLOC_003768	XLOC_003768	Oaz1	10:80826655-80829290	Control_PFC	Experimental_PFC	OK	153.099	266.318	0.798686	3.17718	5e-05	0.000434753	yes
XLOC_003771	XLOC_003771	Gadd45b	10:80930090-80932204	Control_PFC	Experimental_PFC	OK	6.52153	9.5093	0.544129	1.98551	0.0006	0.00409089	yes
XLOC_003776	XLOC_003776	Zbtb7a	10:81135219-81152995	Control_PFC	Experimental_PFC	OK	27.4287	40.3973	0.55857	2.08241	0.0001	0.000825347	yes
XLOC_003788	XLOC_003788	Dohh	10:81384427-81391560	Control_PFC	Experimental_PFC	OK	28.2492	43.5843	0.625599	2.7168	5e-05	0.000434753	yes
XLOC_003795	XLOC_003795	Tle2	10:81572611-81590845	Control_PFC	Experimental_PFC	OK	11.1713	5.60231	-0.995701	-2.63172	5e-05	0.000434753	yes
XLOC_003804	XLOC_003804	Gm4924	10:82378592-82381237	Control_PFC	Experimental_PFC	OK	1.86271	1.10677	-0.751051	-2.06999	0.0005	0.00348019	yes
XLOC_003814	XLOC_003814	1500009L16Rik	10:83722864-83762761	Control_PFC	Experimental_PFC	OK	5.1676	7.68086	0.571774	1.89835	0.0014	0.00853755	yes
XLOC_003817	XLOC_003817	Tcp11l2	10:84576625-84614359	Control_PFC	Experimental_PFC	OK	7.52959	5.67636	-0.407604	-1.4699	0.01015	0.0458211	yes
XLOC_003821	XLOC_003821	Ric8b	10:84917615-85016446	Control_PFC	Experimental_PFC	OK	17.0884	22.252	0.380914	1.79658	0.00175	0.01035	yes
XLOC_003843	XLOC_003843	Igf1	10:87826376-87937042	Control_PFC	Experimental_PFC	OK	3.13119	1.50872	-1.05339	-1.80395	0.00055	0.00378661	yes
XLOC_003868	XLOC_003868	Ntn4	10:93640680-93747207	Control_PFC	Experimental_PFC	OK	6.33454	3.57447	-0.825511	-2.26307	5e-05	0.000434753	yes
XLOC_003891	XLOC_003891	Btg1	10:96617000-96622813	Control_PFC	Experimental_PFC	OK	8.04031	4.21565	-0.931496	-4.23283	5e-05	0.000434753	yes
XLOC_003896	XLOC_003896	Epyc	10:97644067-97682454	Control_PFC	Experimental_PFC	OK	0.685282	1.50971	1.13951	2.05725	0.0006	0.00409089	yes
XLOC_003937	XLOC_003937	Ppfia2	10:106466938-106933467	Control_PFC	Experimental_PFC	OK	28.719	18.657	-0.622286	-2.72545	5e-05	0.000434753	yes
XLOC_003952	XLOC_003952	Gm25117	10:111473191-111498142	Control_PFC	Experimental_PFC	OK	2887.25	6113.59	1.08232	2.07882	0.0013	0.0080057	yes
XLOC_003958	XLOC_003958	Caps2	10:112163620-112216555	Control_PFC	Experimental_PFC	OK	2.86908	1.54831	-0.889896	-2.59012	5e-05	0.000434753	yes
XLOC_004005	XLOC_004005	Wif1	10:121033959-121100650	Control_PFC	Experimental_PFC	OK	0.759976	0.262104	-1.53581	-2.03437	0.0006	0.00409089	yes
XLOC_004014	XLOC_004014	Fam19a2	10:123264075-123741204	Control_PFC	Experimental_PFC	OK	7.93837	11.1993	0.496489	2.33629	0.0002	0.00154481	yes
XLOC_004054	XLOC_004054	Baz2a	10:128092782-128129303	Control_PFC	Experimental_PFC	OK	9.9227	7.59007	-0.386618	-1.82549	0.00185	0.0108623	yes
XLOC_004061	XLOC_004061	Pan2	10:128303334-128321358	Control_PFC	Experimental_PFC	OK	4.17366	2.93306	-0.508906	-2.13771	0.00025	0.00188079	yes
XLOC_004076	XLOC_004076	Wibg	10:128747878-128766568	Control_PFC	Experimental_PFC	OK	8.6795	11.4934	0.405124	1.54484	0.0071	0.0339789	yes
XLOC_004128	XLOC_004128	Rgs17	10:5825662-5922400	Control_PFC	Experimental_PFC	OK	14.7521	23.563	0.675606	2.17442	5e-05	0.000434753	yes
XLOC_004134	XLOC_004134	Pcmt1	10:7629372-7681136	Control_PFC	Experimental_PFC	OK	45.3704	64.0862	0.498263	1.90783	0.00055	0.00378661	yes
XLOC_004141	XLOC_004141	Sash1	10:8722218-8886880	Control_PFC	Experimental_PFC	OK	15.0667	10.5246	-0.517599	-2.41747	5e-05	0.000434753	yes
XLOC_004145	XLOC_004145	Samd5	10:9627258-9675208	Control_PFC	Experimental_PFC	OK	3.58973	4.67591	0.381374	1.42532	0.01125	0.0499794	yes
XLOC_004162	XLOC_004162	Phactr2	10:13207716-13474396	Control_PFC	Experimental_PFC	OK	9.34101	3.87386	-1.26981	-4.26202	5e-05	0.000434753	yes
XLOC_004169	XLOC_004169	Adgrg6	10:14402584-14545036	Control_PFC	Experimental_PFC	OK	0.740435	0.320876	-1.20636	-3.11118	5e-05	0.000434753	yes
XLOC_004177	XLOC_004177	Abracl	10:18011262-18023252	Control_PFC	Experimental_PFC	OK	3.4565	6.26059	0.856984	2.14516	0.00015	0.00118995	yes
XLOC_004185	XLOC_004185	Slc35d3	10:19847916-19851459	Control_PFC	Experimental_PFC	OK	1.89326	3.07343	0.698978	2.2512	0.00015	0.00118995	yes
XLOC_004186	XLOC_004186	Pex7	10:19859928-19907689	Control_PFC	Experimental_PFC	OK	7.89788	11.2626	0.512009	1.62329	0.0042	0.0218178	yes
XLOC_004189	XLOC_004189	Pde7b	10:20398003-20725078	Control_PFC	Experimental_PFC	OK	17.2101	29.4492	0.774971	3.13387	5e-05	0.000434753	yes
XLOC_004221	XLOC_004221	Enpp1	10:24637913-24712159	Control_PFC	Experimental_PFC	OK	1.40836	0.843016	-0.74038	-1.8635	0.0013	0.0080057	yes
XLOC_004228	XLOC_004228	Tmem200a	10:25991185-26079447	Control_PFC	Experimental_PFC	OK	5.01171	6.51991	0.379551	1.68346	0.0025	0.0140585	yes
XLOC_004240	XLOC_004240	Rspo3	10:29453108-29535867	Control_PFC	Experimental_PFC	OK	4.7032	2.94708	-0.674358	-2.40063	5e-05	0.000434753	yes
XLOC_004241	XLOC_004241	Gm10275	10:29698745-29699380	Control_PFC	Experimental_PFC	OK	2.91024	4.81801	0.7273	1.57526	0.0079	0.037161	yes
XLOC_004247	XLOC_004247	Hey2	10:30832358-30842801	Control_PFC	Experimental_PFC	OK	2.57106	1.01554	-1.34012	-3.68792	5e-05	0.000434753	yes
XLOC_004251	XLOC_004251	Tpd52l1	10:31332379-31445921	Control_PFC	Experimental_PFC	OK	7.47974	10.5928	0.502029	1.88963	0.0011	0.00692755	yes
XLOC_004252	XLOC_004252	Rnf217	10:31493192-31609184	Control_PFC	Experimental_PFC	OK	4.76781	3.35753	-0.505928	-2.35097	5e-05	0.000434753	yes
XLOC_004292	XLOC_004292	Gpr6	10:41069988-41072285	Control_PFC	Experimental_PFC	OK	3.19601	11.9332	1.90064	6.30015	5e-05	0.000434753	yes
XLOC_004293	XLOC_004293	Fig4	10:41188171-41303241	Control_PFC	Experimental_PFC	OK	8.7615	13.1925	0.590473	2.7739	5e-05	0.000434753	yes
XLOC_004317	XLOC_004317	Aim1	10:43950306-44148853	Control_PFC	Experimental_PFC	OK	0.650562	0.238077	-1.45026	-3.57058	5e-05	0.000434753	yes
XLOC_004318	XLOC_004318	Prdm1	10:44437176-44528501	Control_PFC	Experimental_PFC	OK	0.823662	0.300389	-1.45522	-2.2295	5e-05	0.000434753	yes
XLOC_004342	XLOC_004342	Fam184a	10:53633144-53750909	Control_PFC	Experimental_PFC	OK	25.747	11.3536	-1.18126	-4.30317	5e-05	0.000434753	yes
XLOC_004396	XLOC_004396	Ccar1	10:62743927-62792368	Control_PFC	Experimental_PFC	OK	11.3888	9.16267	-0.313782	-1.46802	0.01035	0.0465641	yes
XLOC_004417	XLOC_004417	Nrbf2	10:67266688-67285305	Control_PFC	Experimental_PFC	OK	5.35877	7.42631	0.470743	1.78324	0.00155	0.00932883	yes
XLOC_004429	XLOC_004429	Bicc1	10:70868668-71159700	Control_PFC	Experimental_PFC	OK	1.78469	1.0372	-0.782988	-2.24758	5e-05	0.000434753	yes
XLOC_004432	XLOC_004432	Cisd1	10:71330479-71344954	Control_PFC	Experimental_PFC	OK	40.5102	61.3237	0.59816	2.79454	5e-05	0.000434753	yes
XLOC_004445	XLOC_004445	Ddt,Gm20441,Gstt3	10:75771229-75781414	Control_PFC	Experimental_PFC	OK	19.9369	26.7706	0.425207	1.63528	0.0038	0.0200491	yes
XLOC_004449	XLOC_004449	Mif	10:75859352-75860250	Control_PFC	Experimental_PFC	OK	159.297	198.182	0.315108	1.48965	0.0103	0.0463783	yes
XLOC_004462	XLOC_004462	Col6a2	10:76595761-76623630	Control_PFC	Experimental_PFC	OK	4.93811	3.62202	-0.447166	-1.91938	0.0009	0.00581278	yes
XLOC_004463	XLOC_004463	Col6a1	10:76708791-76726168	Control_PFC	Experimental_PFC	OK	22.4935	12.3914	-0.860177	-4.02576	5e-05	0.000434753	yes
XLOC_004464	XLOC_004464	Pcbp3	10:76761856-76961887	Control_PFC	Experimental_PFC	OK	39.7436	14.0091	-1.50436	-4.43599	5e-05	0.000434753	yes
XLOC_004483	XLOC_004483	D10Jhu81e	10:78162066-78169768	Control_PFC	Experimental_PFC	OK	29.2532	42.8553	0.550877	2.58743	5e-05	0.000434753	yes
XLOC_004500	XLOC_004500	2610008E11Rik	10:79064373-79097600	Control_PFC	Experimental_PFC	OK	10.1877	7.04838	-0.531464	-2.51546	5e-05	0.000434753	yes
XLOC_004510	XLOC_004510	Rnf126	10:79758514-79766952	Control_PFC	Experimental_PFC	OK	18.685	23.1701	0.310384	1.47708	0.01055	0.0472959	yes
XLOC_004516	XLOC_004516	R3hdm4	10:79910052-79922273	Control_PFC	Experimental_PFC	OK	55.7295	77.0737	0.467796	2.03171	0.00025	0.00188079	yes
XLOC_004518	XLOC_004518	Polr2e	10:80035948-80039795	Control_PFC	Experimental_PFC	OK	24.0121	32.5974	0.440996	2.07934	0.0003	0.00221024	yes
XLOC_004519	XLOC_004519	Sbno2	10:80057415-80102698	Control_PFC	Experimental_PFC	OK	3.43032	2.61225	-0.393051	-1.57665	0.00735	0.0349866	yes
XLOC_004528	XLOC_004528	Uqcr11	10:80402996-80406830	Control_PFC	Experimental_PFC	OK	195.078	393.927	1.01388	4.7158	5e-05	0.000434753	yes
XLOC_004533	XLOC_004533	Abhd17a	10:80583653-80590341	Control_PFC	Experimental_PFC	OK	53.2156	78.613	0.562919	2.63118	5e-05	0.000434753	yes
XLOC_004542	XLOC_004542	Lingo3	10:80832806-80844039	Control_PFC	Experimental_PFC	OK	8.76912	15.8717	0.855953	3.90822	5e-05	0.000434753	yes
XLOC_004543	XLOC_004543	Lsm7	10:80852824-80855209	Control_PFC	Experimental_PFC	OK	21.1908	30.3365	0.517617	1.83764	0.00185	0.0108623	yes
XLOC_004544	XLOC_004544	Timm13	10:80899449-80900969	Control_PFC	Experimental_PFC	OK	24.7443	40.6317	0.715507	3.35858	5e-05	0.000434753	yes
XLOC_004546	XLOC_004546	Gng7	10:80948623-81014945	Control_PFC	Experimental_PFC	OK	27.7082	59.3544	1.09904	4.10826	5e-05	0.000434753	yes
XLOC_004557	XLOC_004557	Mrpl54	10:81264712-81266934	Control_PFC	Experimental_PFC	OK	20.7664	30.3057	0.545336	2.147	0.0001	0.000825347	yes
XLOC_004588	XLOC_004588	Appl2	10:83600032-83648738	Control_PFC	Experimental_PFC	OK	29.9078	18.274	-0.710727	-2.09153	0.0003	0.00221024	yes
XLOC_004622	XLOC_004622	Ano4	10:88948993-89344762	Control_PFC	Experimental_PFC	OK	11.2681	7.82319	-0.526414	-2.01509	0.00045	0.00317388	yes
XLOC_004631	XLOC_004631	Gm24119	10:91116573-91124059	Control_PFC	Experimental_PFC	OK	308.27	1295.52	2.07127	3.78253	5e-05	0.000434753	yes
XLOC_004638	XLOC_004638	Nedd1	10:92684745-92722420	Control_PFC	Experimental_PFC	OK	1.07943	0.728189	-0.56788	-1.47402	0.01045	0.0469485	yes
XLOC_004641	XLOC_004641	Elk3	10:93247413-93311135	Control_PFC	Experimental_PFC	OK	4.00298	2.22381	-0.848041	-2.5024	5e-05	0.000434753	yes
XLOC_004678	XLOC_004678	Nts	10:102481759-102490418	Control_PFC	Experimental_PFC	OK	1.25521	0.596742	-1.07275	-1.70886	0.00485	0.0246483	yes
XLOC_004713	XLOC_004713	Gm28592	10:111506285-111508645	Control_PFC	Experimental_PFC	OK	4.14709	7.33212	0.822131	1.73963	0.0027	0.0150118	yes
XLOC_004727	XLOC_004727	Lgr5	10:115450310-115587780	Control_PFC	Experimental_PFC	OK	8.51404	1.04025	-3.03292	-3.98676	5e-05	0.000434753	yes
XLOC_004739	XLOC_004739	Yeats4	10:117215141-117224507	Control_PFC	Experimental_PFC	OK	12.2336	16.1818	0.403521	1.76972	0.0023	0.0130957	yes
XLOC_004771	XLOC_004771	Tbc1d30	10:121263823-121311189	Control_PFC	Experimental_PFC	OK	16.7855	26.8957	0.680158	3.1457	5e-05	0.000434753	yes
XLOC_004772	XLOC_004772	Rassf3	10:121410349-121476250	Control_PFC	Experimental_PFC	OK	6.34429	9.22486	0.540069	2.51314	5e-05	0.000434753	yes
XLOC_004784	XLOC_004784	Xrcc6bp1	10:126868429-126901371	Control_PFC	Experimental_PFC	OK	3.34943	5.07427	0.599285	1.67142	0.004	0.0209331	yes
XLOC_004791	XLOC_004791	Slc26a10	10:127172425-127180645	Control_PFC	Experimental_PFC	OK	0.411516	0.743088	0.852584	1.5366	0.00855	0.0397114	yes
XLOC_004804	XLOC_004804	Nxph4	10:127525472-127534559	Control_PFC	Experimental_PFC	OK	2.83439	1.04091	-1.44519	-3.45935	5e-05	0.000434753	yes
XLOC_004823	XLOC_004823	Myl6	10:128490859-128493875	Control_PFC	Experimental_PFC	OK	231.91	398.06	0.779424	3.53286	5e-05	0.000434753	yes
XLOC_004828	XLOC_004828	Rpl41	10:128548113-128549305	Control_PFC	Experimental_PFC	OK	465.017	877.792	0.916596	3.89786	5e-05	0.000434753	yes
XLOC_004829	XLOC_004829	Pa2g4	10:128557765-128565934	Control_PFC	Experimental_PFC	OK	17.9272	23.5404	0.392989	1.80173	0.005	0.0252887	yes
XLOC_004830	XLOC_004830	Erbb3	10:128567522-128589652	Control_PFC	Experimental_PFC	OK	3.75885	2.83893	-0.404943	-1.80827	0.00175	0.01035	yes
XLOC_004839	XLOC_004839	Tmem198b	10:128790952-128804370	Control_PFC	Experimental_PFC	OK	3.1377	1.80538	-0.797406	-2.30383	0.0001	0.000825347	yes
XLOC_004841	XLOC_004841	Gdf11	10:128882294-128891718	Control_PFC	Experimental_PFC	OK	5.23202	3.49314	-0.582843	-2.51754	5e-05	0.000434753	yes
XLOC_004925	XLOC_004925	Rasl10a	11:5054131-5065327	Control_PFC	Experimental_PFC	OK	15.6603	24.4403	0.642155	1.52419	0.00885	0.0408835	yes
XLOC_004934	XLOC_004934	Aebp1	11:5861946-5872088	Control_PFC	Experimental_PFC	OK	4.90969	2.04299	-1.26495	-4.12098	5e-05	0.000434753	yes
XLOC_004947	XLOC_004947	Ccm2	11:6546886-6596744	Control_PFC	Experimental_PFC	OK	17.6336	25.6198	0.538928	2.24809	5e-05	0.000434753	yes
XLOC_004987	XLOC_004987	C1d	11:17257578-17269176	Control_PFC	Experimental_PFC	OK	17.0882	27.1577	0.668361	1.61853	0.00375	0.0198305	yes
XLOC_004999	XLOC_004999	Spred2	11:19924374-20024026	Control_PFC	Experimental_PFC	OK	21.7434	41.3379	0.926889	3.16772	5e-05	0.000434753	yes
XLOC_005043	XLOC_005043	Fancl	11:26386134-26593999	Control_PFC	Experimental_PFC	OK	5.67539	9.16928	0.692088	1.82947	0.0018	0.0106044	yes
XLOC_005060	XLOC_005060	Efemp1	11:28853203-28926743	Control_PFC	Experimental_PFC	OK	3.88679	2.20785	-0.815939	-2.27755	0.0001	0.000825347	yes
XLOC_005089	XLOC_005089	Snrnp25	11:32205414-32208984	Control_PFC	Experimental_PFC	OK	7.14032	11.4863	0.685848	2.15008	5e-05	0.000434753	yes
XLOC_005092	XLOC_005092	Hba-a1	11:32283510-32284465	Control_PFC	Experimental_PFC	OK	154.84	87.172	-0.828845	-3.70795	5e-05	0.000434753	yes
XLOC_005094	XLOC_005094	Hba-a2	11:32296488-32297298	Control_PFC	Experimental_PFC	OK	104.973	67.03	-0.647134	-3.04247	5e-05	0.000434753	yes
XLOC_005096	XLOC_005096	Sh3pxd2b	11:32347819-32428173	Control_PFC	Experimental_PFC	OK	3.76984	2.50072	-0.592161	-2.47545	5e-05	0.000434753	yes
XLOC_005114	XLOC_005114	Fam196b	11:34226814-34783892	Control_PFC	Experimental_PFC	OK	2.82375	0.56872	-2.31182	-5.06345	5e-05	0.000434753	yes
XLOC_005142	XLOC_005142	Gabrb2	11:42419756-42629028	Control_PFC	Experimental_PFC	OK	61.2717	85.9122	0.487644	1.61684	0.00585	0.0289118	yes
XLOC_005192	XLOC_005192	Zfp62	11:49203291-49218816	Control_PFC	Experimental_PFC	OK	24.1646	37.3074	0.626568	1.75383	0.0016	0.00958802	yes
XLOC_005246	XLOC_005246	Col23a1	11:51289919-51583918	Control_PFC	Experimental_PFC	OK	2.57409	1.00936	-1.35063	-3.54748	5e-05	0.000434753	yes
XLOC_005248	XLOC_005248	Nhp2	11:51619734-51635896	Control_PFC	Experimental_PFC	OK	13.7714	26.1193	0.923436	2.09216	0.00055	0.00378661	yes
XLOC_005295	XLOC_005295	Hint1	11:54866382-54870501	Control_PFC	Experimental_PFC	OK	112.715	172.484	0.613779	2.89158	5e-05	0.000434753	yes
XLOC_005313	XLOC_005313	Galnt10	11:57623697-57787514	Control_PFC	Experimental_PFC	OK	2.58535	1.83797	-0.492247	-1.66754	0.00465	0.0237897	yes
XLOC_005326	XLOC_005326	Zfp692	11:58307068-58314627	Control_PFC	Experimental_PFC	OK	7.51649	5.46614	-0.459537	-1.78385	0.00245	0.0138233	yes
XLOC_005351	XLOC_005351	Hist3h2ba	11:58948919-58949533	Control_PFC	Experimental_PFC	OK	23.1722	47.3628	1.03136	4.32223	5e-05	0.000434753	yes
XLOC_005352	XLOC_005352	Hist3h2a,Trim17	11:58954684-58978050	Control_PFC	Experimental_PFC	OK	17.8434	26.053	0.546061	2.46064	0.0001	0.000825347	yes
XLOC_005358	XLOC_005358	Wnt9a	11:59306927-59333552	Control_PFC	Experimental_PFC	OK	3.12689	4.07663	0.382649	1.50748	0.00875	0.0405077	yes
XLOC_005390	XLOC_005390	Dhrs7b	11:60830630-60860195	Control_PFC	Experimental_PFC	OK	6.80335	9.95522	0.549208	2.08537	0.00035	0.00253699	yes
XLOC_005411	XLOC_005411	Ubb	11:62551170-62553213	Control_PFC	Experimental_PFC	OK	299.474	408.01	0.446172	1.65076	0.00425	0.022041	yes
XLOC_005413	XLOC_005413	2410006H16Rik	11:62602876-62604807	Control_PFC	Experimental_PFC	OK	25.7787	37.5433	0.542379	1.99581	0.00055	0.00378661	yes
XLOC_005426	XLOC_005426	Tvp23b	11:62879454-62916780	Control_PFC	Experimental_PFC	OK	10.3361	13.9278	0.430273	1.5691	0.006	0.0295202	yes
XLOC_005436	XLOC_005436	Hs3st3a1	11:64435155-64522841	Control_PFC	Experimental_PFC	OK	1.21127	0.532822	-1.1848	-2.97916	5e-05	0.000434753	yes
XLOC_005460	XLOC_005460	Stx8	11:67966192-68207148	Control_PFC	Experimental_PFC	OK	13.7803	20.2029	0.551952	1.59945	0.00525	0.0263478	yes
XLOC_005469	XLOC_005469	Rpl26	11:68901582-68906989	Control_PFC	Experimental_PFC	OK	100.462	147.976	0.558721	2.6166	5e-05	0.000434753	yes
XLOC_005475	XLOC_005475	2310047M10Rik	11:69057717-69061578	Control_PFC	Experimental_PFC	OK	8.74186	12.4847	0.514147	2.20057	5e-05	0.000434753	yes
XLOC_005477	XLOC_005477	Snord118	11:69073426-69073561	Control_PFC	Experimental_PFC	OK	108.321	305.556	1.49612	2.91929	5e-05	0.000434753	yes
XLOC_005484	XLOC_005484	Alox12b	11:69156988-69169792	Control_PFC	Experimental_PFC	OK	1.62554	2.5115	0.627631	1.87065	0.00185	0.0108623	yes
XLOC_005491	XLOC_005491	Naa38	11:69391924-69398234	Control_PFC	Experimental_PFC	OK	20.4706	36.7926	0.845866	2.31225	0.0001	0.000825347	yes
XLOC_005501	XLOC_005501	Tmem256	11:69838513-69839618	Control_PFC	Experimental_PFC	OK	37.8899	62.9157	0.731605	3.03364	5e-05	0.000434753	yes
XLOC_005504	XLOC_005504	Gps2	11:69913887-69916591	Control_PFC	Experimental_PFC	OK	9.71844	6.35445	-0.612956	-1.74067	0.00235	0.0133425	yes
XLOC_005524	XLOC_005524	Med11	11:70451918-70453727	Control_PFC	Experimental_PFC	OK	5.88668	8.48714	0.527824	1.61156	0.0053	0.0265686	yes
XLOC_005528	XLOC_005528	Psmb6	11:70525366-70527858	Control_PFC	Experimental_PFC	OK	76.4404	111.816	0.548719	2.55154	5e-05	0.000434753	yes
XLOC_005566	XLOC_005566	Camkk1	11:73019007-73042073	Control_PFC	Experimental_PFC	OK	30.0659	39.0744	0.378094	1.76598	0.0017	0.0100963	yes
XLOC_005567	XLOC_005567	1200014J11Rik	11:73047782-73089317	Control_PFC	Experimental_PFC	OK	4.69812	3.36641	-0.480871	-1.74539	0.00275	0.01525	yes
XLOC_005610	XLOC_005610	Rtn4rl1	11:75193782-75267769	Control_PFC	Experimental_PFC	OK	14.4399	19.2662	0.416007	1.96101	0.00055	0.00378661	yes
XLOC_005613	XLOC_005613	Tlcd2	11:75461538-75470899	Control_PFC	Experimental_PFC	OK	11.2141	16.4298	0.551009	1.69287	0.00165	0.00984883	yes
XLOC_005669	XLOC_005669	Unc119	11:78343481-78349164	Control_PFC	Experimental_PFC	OK	9.53965	12.4399	0.382961	1.4684	0.01045	0.0469485	yes
XLOC_005763	XLOC_005763	Ppm1d	11:85311243-85347066	Control_PFC	Experimental_PFC	OK	6.18787	8.10483	0.38934	1.48198	0.0108	0.0482642	yes
XLOC_005795	XLOC_005795	Supt4a	11:87737551-87743623	Control_PFC	Experimental_PFC	OK	30.2818	48.3662	0.675547	3.05662	5e-05	0.000434753	yes
XLOC_005822	XLOC_005822	Mmd	11:90187683-90278589	Control_PFC	Experimental_PFC	OK	45.5273	63.5223	0.480531	2.18618	0.0001	0.000825347	yes
XLOC_005831	XLOC_005831	B230206L02Rik	11:94133484-94155776	Control_PFC	Experimental_PFC	OK	3.11072	5.44034	0.806448	1.53416	0.0071	0.0339789	yes
XLOC_005846	XLOC_005846	Samd14	11:95009878-95026087	Control_PFC	Experimental_PFC	OK	5.73524	3.89351	-0.558784	-2.28556	0.00015	0.00118995	yes
XLOC_005854	XLOC_005854	Slc35b1	11:95384691-95391776	Control_PFC	Experimental_PFC	OK	22.134	28.5428	0.366865	1.66129	0.0037	0.019607	yes
XLOC_005857	XLOC_005857	Phb	11:95666956-95680773	Control_PFC	Experimental_PFC	OK	38.9202	54.6514	0.48974	1.61931	0.00525	0.0263478	yes
XLOC_005905	XLOC_005905	Mrpl45	11:97315715-97329920	Control_PFC	Experimental_PFC	OK	8.41338	10.7555	0.35432	1.46272	0.0104	0.0467574	yes
XLOC_005913	XLOC_005913	Psmb3	11:97703398-97713500	Control_PFC	Experimental_PFC	OK	55.1768	76.9484	0.47983	2.27219	0.0001	0.000825347	yes
XLOC_005921	XLOC_005921	Rpl19	11:98001507-98030492	Control_PFC	Experimental_PFC	OK	250.297	389.842	0.639248	2.14148	0.0003	0.00221024	yes
XLOC_005928	XLOC_005928	Ppp1r1b	11:98348403-98358283	Control_PFC	Experimental_PFC	OK	52.9604	164.003	1.63074	6.26251	5e-05	0.000434753	yes
XLOC_005950	XLOC_005950	Igfbp4	11:99041243-99054392	Control_PFC	Experimental_PFC	OK	25.3506	37.1835	0.552645	1.87508	0.00115	0.00719815	yes
XLOC_006002	XLOC_006002	Rpl27	11:101442297-101445529	Control_PFC	Experimental_PFC	OK	95.79	134.243	0.486897	2.28051	0.00015	0.00118995	yes
XLOC_006004	XLOC_006004	Rnd2	11:101458744-101471853	Control_PFC	Experimental_PFC	OK	29.6021	43.0556	0.540501	1.97662	0.0007	0.00467802	yes
XLOC_006008	XLOC_006008	Gm26316	11:101604849-101605040	Control_PFC	Experimental_PFC	OK	25.0137	56.2128	1.16818	2.49213	0.0002	0.00154481	yes
XLOC_006014	XLOC_006014	Arl4d	11:101665540-101667832	Control_PFC	Experimental_PFC	OK	12.6112	21.2457	0.752459	3.36346	5e-05	0.000434753	yes
XLOC_006047	XLOC_006047	Rprml	11:103649569-103650579	Control_PFC	Experimental_PFC	OK	25.2695	43.833	0.794621	3.66443	5e-05	0.000434753	yes
XLOC_006052	XLOC_006052	Crhr1	11:104132854-104175523	Control_PFC	Experimental_PFC	OK	10.186	7.28344	-0.483897	-2.16945	0.00025	0.00188079	yes
XLOC_006056	XLOC_006056	Myl4	11:104550662-104595753	Control_PFC	Experimental_PFC	OK	20.5016	38.3523	0.903578	3.68586	5e-05	0.000434753	yes
XLOC_006068	XLOC_006068	Mrc2	11:105292642-105351139	Control_PFC	Experimental_PFC	OK	2.38246	1.46966	-0.696967	-1.41638	0.00775	0.0365685	yes
XLOC_006078	XLOC_006078	Kcnh6	11:106008123-106034549	Control_PFC	Experimental_PFC	OK	0.97358	0.558905	-0.800696	-1.47263	0.0033	0.0177984	yes
XLOC_006080	XLOC_006080	Taco1	11:106065076-106073612	Control_PFC	Experimental_PFC	OK	4.99804	8.0368	0.68526	2.39756	0.0001	0.000825347	yes
XLOC_006114	XLOC_006114	Cep112	11:108425191-108860615	Control_PFC	Experimental_PFC	OK	7.70185	3.81271	-1.01439	-1.81711	0.00025	0.00188079	yes
XLOC_006116	XLOC_006116	Cep112os2	11:108425191-108860615	Control_PFC	Experimental_PFC	OK	3.29891	2.14237	-0.622783	-2.09458	0.0005	0.00348019	yes
XLOC_006132	XLOC_006132	Kcnj16	11:110968032-111027968	Control_PFC	Experimental_PFC	OK	6.27849	4.66187	-0.429509	-1.72028	0.00135	0.00827436	yes
XLOC_006133	XLOC_006133	Kcnj2	11:111066163-111076821	Control_PFC	Experimental_PFC	OK	5.92942	7.97068	0.426812	1.99523	0.0005	0.00348019	yes
XLOC_006136	XLOC_006136	Sox9	11:112782223-112787760	Control_PFC	Experimental_PFC	OK	4.20819	3.19271	-0.398417	-1.67385	0.0043	0.0222504	yes
XLOC_006149	XLOC_006149	Rpl38	11:114668523-114672331	Control_PFC	Experimental_PFC	OK	336.839	447.83	0.410889	1.9407	0.0005	0.00348019	yes
XLOC_006158	XLOC_006158	Rab37	11:115091430-115162236	Control_PFC	Experimental_PFC	OK	2.57929	0.626842	-2.0408	-3.80081	5e-05	0.000434753	yes
XLOC_006162	XLOC_006162	Otop2	11:115307162-115332303	Control_PFC	Experimental_PFC	OK	1.60287	0.412387	-1.95859	-1.08508	0.0079	0.037161	yes
XLOC_006196	XLOC_006196	Sphk1	11:116529214-116536674	Control_PFC	Experimental_PFC	OK	3.02034	1.69821	-0.830698	-1.64206	0.0008	0.00525136	yes
XLOC_006205	XLOC_006205	Snhg20	11:117076789-117078955	Control_PFC	Experimental_PFC	OK	69.4372	162.202	1.22401	5.33393	5e-05	0.000434753	yes
XLOC_006240	XLOC_006240	Rnf213	11:119393099-119487418	Control_PFC	Experimental_PFC	OK	2.54695	1.80637	-0.495679	-2.29615	5e-05	0.000434753	yes
XLOC_006246	XLOC_006246	Gm11766	11:119935802-119942698	Control_PFC	Experimental_PFC	OK	3.04491	2.10101	-0.535317	-1.79837	0.0016	0.00958802	yes
XLOC_006257	XLOC_006257	Mrpl12	11:120484612-120489065	Control_PFC	Experimental_PFC	OK	15.7918	22.8763	0.534676	2.17302	0.0002	0.00154481	yes
XLOC_006261	XLOC_006261	Anapc11	11:120598420-120608198	Control_PFC	Experimental_PFC	OK	20.0385	29.4537	0.555676	2.40297	5e-05	0.000434753	yes
XLOC_006267	XLOC_006267	Lrrc45	11:120713924-120721128	Control_PFC	Experimental_PFC	OK	17.9302	11.4754	-0.643841	-2.64385	5e-05	0.000434753	yes
XLOC_006271	XLOC_006271	Gps1	11:120784271-120789102	Control_PFC	Experimental_PFC	OK	47.0323	63.9769	0.4439	1.99732	0.00045	0.00317388	yes
XLOC_006299	XLOC_006299	Inpp5j	11:3488283-3504821	Control_PFC	Experimental_PFC	OK	32.3535	13.8247	-1.22668	-5.17495	5e-05	0.000434753	yes
XLOC_006320	XLOC_006320	Uqcr10	11:4701972-4704342	Control_PFC	Experimental_PFC	OK	142.944	267.013	0.901453	4.22397	5e-05	0.000434753	yes
XLOC_006323	XLOC_006323	Nefh	11:4938753-4948064	Control_PFC	Experimental_PFC	OK	17.9378	25.0736	0.483166	2.27657	0.0002	0.00154481	yes
XLOC_006326	XLOC_006326	Emid1	11:5106264-5152257	Control_PFC	Experimental_PFC	OK	2.64413	1.47125	-0.84575	-1.5031	0.00175	0.01035	yes
XLOC_006351	XLOC_006351	Gm11974,Gm22457	11:6525590-6528760	Control_PFC	Experimental_PFC	OK	304.035	1342.82	2.14295	4.53414	5e-05	0.000434753	yes
XLOC_006355	XLOC_006355	Tbrg4	11:6615597-6626067	Control_PFC	Experimental_PFC	OK	234.053	629.022	1.42627	1.84177	0.0049	0.0248537	yes
XLOC_006386	XLOC_006386	4930512M02Rik	11:11589222-11627835	Control_PFC	Experimental_PFC	OK	3.02244	1.53561	-0.976905	-1.76903	0.0018	0.0106044	yes
XLOC_006395	XLOC_006395	Cobl	11:12236607-12464960	Control_PFC	Experimental_PFC	OK	32.3825	48.5972	0.585661	1.59171	0.0065	0.0315788	yes
XLOC_006399	XLOC_006399	Sec61g	11:16500529-16508484	Control_PFC	Experimental_PFC	OK	27.6315	39.746	0.524494	1.9584	0.00085	0.00553519	yes
XLOC_006400	XLOC_006400	Gm12663	11:16635108-16636066	Control_PFC	Experimental_PFC	OK	2.26696	3.63275	0.680304	1.62646	0.0054	0.0269987	yes
XLOC_006422	XLOC_006422	Meis1	11:18879816-19018985	Control_PFC	Experimental_PFC	OK	9.87116	2.1015	-2.2318	-7.25455	5e-05	0.000434753	yes
XLOC_006490	XLOC_006490	Vrk2	11:26386134-26593999	Control_PFC	Experimental_PFC	OK	2.44948	5.33232	1.12229	1.88365	0.0008	0.00525136	yes
XLOC_006526	XLOC_006526	Bod1	11:31665180-31671885	Control_PFC	Experimental_PFC	OK	28.9215	37.1675	0.361899	1.68057	0.00405	0.0211667	yes
XLOC_006547	XLOC_006547	Kcnip1	11:33629338-34098554	Control_PFC	Experimental_PFC	OK	11.4444	8.37975	-0.449663	-1.82159	0.002	0.0116276	yes
XLOC_006554	XLOC_006554	Fbll1	11:35797381-35798884	Control_PFC	Experimental_PFC	OK	12.5759	18.3801	0.54748	2.46406	0.00015	0.00118995	yes
XLOC_006566	XLOC_006566	Mat2b	11:40679313-40695203	Control_PFC	Experimental_PFC	OK	45.3692	62.5547	0.463404	1.96432	0.00085	0.00553519	yes
XLOC_006568	XLOC_006568	Ccng1	11:40748551-40755311	Control_PFC	Experimental_PFC	OK	27.3834	34.7905	0.345393	1.58405	0.0053	0.0265686	yes
XLOC_006584	XLOC_006584	Adra1b	11:43774605-43901210	Control_PFC	Experimental_PFC	OK	7.35535	9.58437	0.38189	1.58468	0.00655	0.0317811	yes
XLOC_006596	XLOC_006596	Lsm11	11:45928268-45944935	Control_PFC	Experimental_PFC	OK	5.71442	7.33817	0.360814	1.70506	0.00325	0.0175643	yes
XLOC_006611	XLOC_006611	Sgcd	11:46896252-47988969	Control_PFC	Experimental_PFC	OK	6.31144	3.77173	-0.742744	-2.02795	0.0007	0.00467802	yes
XLOC_006661	XLOC_006661	N4bp3	11:51643062-51650842	Control_PFC	Experimental_PFC	OK	4.85685	7.14589	0.55709	1.99669	0.00055	0.00378661	yes
XLOC_006664	XLOC_006664	Gm25291	11:51692263-51763634	Control_PFC	Experimental_PFC	OK	1985.19	3530.67	0.830668	2.58202	5e-05	0.000434753	yes
XLOC_006681	XLOC_006681	Uqcrq	11:53427921-53430831	Control_PFC	Experimental_PFC	OK	98.4878	155.323	0.657251	2.52185	5e-05	0.000434753	yes
XLOC_006685	XLOC_006685	Sowaha	11:53476572-53481097	Control_PFC	Experimental_PFC	OK	18.7342	25.1169	0.422983	1.98143	0.00075	0.00496726	yes
XLOC_006694	XLOC_006694	Slc22a5	11:53864541-53891660	Control_PFC	Experimental_PFC	OK	4.43737	2.59712	-0.772791	-2.16776	0.00025	0.00188079	yes
XLOC_006710	XLOC_006710	Anxa6	11:54979107-55033445	Control_PFC	Experimental_PFC	OK	33.9036	42.551	0.327756	1.54256	0.0071	0.0339789	yes
XLOC_006717	XLOC_006717	Sparc	11:55394499-55420080	Control_PFC	Experimental_PFC	OK	49.4164	38.1407	-0.373656	-1.7368	0.0023	0.0130957	yes
XLOC_006718	XLOC_006718	Atox1	11:55446640-55461239	Control_PFC	Experimental_PFC	OK	43.8581	73.6605	0.748049	3.35296	5e-05	0.000434753	yes
XLOC_006755	XLOC_006755	Rnf187	11:58932287-58938916	Control_PFC	Experimental_PFC	OK	103.702	134.794	0.37832	1.67143	0.004	0.0209331	yes
XLOC_006759	XLOC_006759	Obscn	11:58994255-59136402	Control_PFC	Experimental_PFC	OK	0.533955	1.24447	1.22074	3.06148	5e-05	0.000434753	yes
XLOC_006761	XLOC_006761	Gjc2	11:59175567-59183213	Control_PFC	Experimental_PFC	OK	2.02546	2.89878	0.517197	1.58441	0.00725	0.0345895	yes
XLOC_006762	XLOC_006762	Guk1	11:59183874-59192212	Control_PFC	Experimental_PFC	OK	47.8096	68.5667	0.520208	2.34346	0.0001	0.000825347	yes
XLOC_006765	XLOC_006765	Arf1	11:59211411-59228270	Control_PFC	Experimental_PFC	OK	117.027	150.176	0.359806	1.58327	0.00605	0.0297195	yes
XLOC_006769	XLOC_006769	Snap47	11:59407133-59458567	Control_PFC	Experimental_PFC	OK	124.788	166.65	0.41734	1.54267	0.0076	0.0360012	yes
XLOC_006819	XLOC_006819	Slc47a1	11:61343400-61378345	Control_PFC	Experimental_PFC	OK	1.61455	0.777106	-1.05495	-1.54924	0.0032	0.0173398	yes
XLOC_006832	XLOC_006832	Zswim7	11:62267223-62281375	Control_PFC	Experimental_PFC	OK	6.31549	9.72102	0.622213	1.84382	0.00135	0.00827436	yes
XLOC_006851	XLOC_006851	Hs3st3b1	11:63885791-63922290	Control_PFC	Experimental_PFC	OK	0.927871	0.381596	-1.28188	-3.1927	5e-05	0.000434753	yes
XLOC_006898	XLOC_006898	Kdm6b	11:69398507-69413675	Control_PFC	Experimental_PFC	OK	3.88946	2.64497	-0.556321	-1.59799	0.0058	0.028702	yes
XLOC_006910	XLOC_006910	Eif4a1	11:69666935-69672423	Control_PFC	Experimental_PFC	OK	14068.6	24722.1	0.813328	2.11393	0.00045	0.00317388	yes
XLOC_006929	XLOC_006929	Eif5a	11:69916713-69921958	Control_PFC	Experimental_PFC	OK	110.644	146.21	0.402123	1.77977	0.0022	0.0126201	yes
XLOC_006951	XLOC_006951	Pfn1	11:70651849-70654644	Control_PFC	Experimental_PFC	OK	62.8371	86.2882	0.457545	2.12361	5e-05	0.000434753	yes
XLOC_006954	XLOC_006954	Inca1	11:70688360-70700155	Control_PFC	Experimental_PFC	OK	1.07447	1.88809	0.813298	1.46909	0.0068	0.0327479	yes
XLOC_006978	XLOC_006978	Pitpnm3	11:72047527-72135778	Control_PFC	Experimental_PFC	OK	25.4879	18.7792	-0.440681	-1.60874	0.0021	0.0121275	yes
XLOC_006992	XLOC_006992	Emc6	11:73175518-73177037	Control_PFC	Experimental_PFC	OK	12.9862	21.6481	0.737267	2.8328	5e-05	0.000434753	yes
XLOC_007039	XLOC_007039	Rpa1	11:75298165-75348324	Control_PFC	Experimental_PFC	OK	13.8686	22.0211	0.667062	2.45634	0.0001	0.000825347	yes
XLOC_007040	XLOC_007040	Serpinf1	11:75409768-75423340	Control_PFC	Experimental_PFC	OK	12.9512	7.1	-0.867191	-1.8448	0.0032	0.0173398	yes
XLOC_007046	XLOC_007046	Doc2b	11:75768965-75825241	Control_PFC	Experimental_PFC	OK	3.84439	5.51228	0.519892	2.28764	5e-05	0.000434753	yes
XLOC_007073	XLOC_007073	Traf4	11:78158498-78165589	Control_PFC	Experimental_PFC	OK	3.95741	2.69287	-0.555412	-1.71972	0.00275	0.01525	yes
XLOC_007095	XLOC_007095	Ksr1	11:79013439-79146407	Control_PFC	Experimental_PFC	OK	10.5794	8.08841	-0.387327	-1.62632	0.00195	0.0113736	yes
XLOC_007096	XLOC_007096	Wsb1	11:79239371-79254671	Control_PFC	Experimental_PFC	OK	37.3003	27.2608	-0.452358	-1.84789	0.0015	0.00906687	yes
XLOC_007152	XLOC_007152	Dusp14	11:84048040-84069261	Control_PFC	Experimental_PFC	OK	29.0709	46.9267	0.690835	3.16513	5e-05	0.000434753	yes
XLOC_007163	XLOC_007163	Znhit3	11:84876314-84916366	Control_PFC	Experimental_PFC	OK	13.6694	22.0021	0.686687	1.81826	0.00395	0.0207122	yes
XLOC_007180	XLOC_007180	Vmp1	11:86583864-86683836	Control_PFC	Experimental_PFC	OK	42.8023	86.0343	1.00722	2.93006	5e-05	0.000434753	yes
XLOC_007191	XLOC_007191	Ppm1e	11:87226905-87359023	Control_PFC	Experimental_PFC	OK	55.7239	37.605	-0.567373	-2.07783	5e-05	0.000434753	yes
XLOC_007218	XLOC_007218	4932411E22Rik	11:89390222-89418948	Control_PFC	Experimental_PFC	OK	1.19739	0.315688	-1.92332	-3.71057	5e-05	0.000434753	yes
XLOC_007219	XLOC_007219	Ankfn1	11:89420986-89639631	Control_PFC	Experimental_PFC	OK	2.34903	0.530233	-2.14737	-4.71886	5e-05	0.000434753	yes
XLOC_007237	XLOC_007237	Gm20390,Nme1,Nme2	11:93949813-93968521	Control_PFC	Experimental_PFC	OK	119.216	165.115	0.469888	1.69504	0.0029	0.015939	yes
XLOC_007240	XLOC_007240	Luc7l3	11:94287889-94321988	Control_PFC	Experimental_PFC	OK	47.2617	30.3373	-0.639579	-2.272	5e-05	0.000434753	yes
XLOC_007267	XLOC_007267	Nxph3	11:95509844-95514570	Control_PFC	Experimental_PFC	OK	7.43337	11.6416	0.647201	2.83205	5e-05	0.000434753	yes
XLOC_007277	XLOC_007277	Atp5g1	11:96068851-96075670	Control_PFC	Experimental_PFC	OK	148.996	199.662	0.422285	1.85282	0.00135	0.00827436	yes
XLOC_007298	XLOC_007298	Tbx21	11:97098070-97115331	Control_PFC	Experimental_PFC	OK	1.75833	0.0539585	-5.02621	-3.98016	5e-05	0.000434753	yes
XLOC_007309	XLOC_007309	E130012A19Rik	11:97627388-97629702	Control_PFC	Experimental_PFC	OK	12.7398	20.7662	0.704894	3.32052	5e-05	0.000434753	yes
XLOC_007311	XLOC_007311	Pcgf2	11:97688822-97700497	Control_PFC	Experimental_PFC	OK	7.39576	4.01867	-0.879978	-2.32879	0.00015	0.00118995	yes
XLOC_007319	XLOC_007319	Plxdc1	11:97923237-97986444	Control_PFC	Experimental_PFC	OK	6.70745	9.28909	0.469772	1.97845	0.0008	0.00525136	yes
XLOC_007327	XLOC_007327	Neurod2	11:98325414-98329648	Control_PFC	Experimental_PFC	OK	11.23	15.9523	0.506403	2.39094	5e-05	0.000434753	yes
XLOC_007331	XLOC_007331	Mien1	11:98412469-98439046	Control_PFC	Experimental_PFC	OK	36.4771	51.6547	0.501908	2.18446	0.0001	0.000825347	yes
XLOC_007355	XLOC_007355	Krt20	11:99428402-99438150	Control_PFC	Experimental_PFC	OK	0.875468	0.476739	-0.876855	-1.61478	0.00755	0.0358025	yes
XLOC_007415	XLOC_007415	Hap1	11:100347326-100356128	Control_PFC	Experimental_PFC	OK	47.1424	25.0765	-0.91069	-3.88571	5e-05	0.000434753	yes
XLOC_007444	XLOC_007444	Coa3	11:101277967-101302286	Control_PFC	Experimental_PFC	OK	36.8211	65.8584	0.838836	1.84461	0.0013	0.0080057	yes
XLOC_007455	XLOC_007455	Gm23971	11:101645739-101645930	Control_PFC	Experimental_PFC	OK	168.731	251.153	0.573841	2.14546	0.00025	0.00188079	yes
XLOC_007467	XLOC_007467	Tmem101	11:102152545-102156404	Control_PFC	Experimental_PFC	OK	7.49887	9.79606	0.385528	1.44298	0.0099	0.0448848	yes
XLOC_007556	XLOC_007556	Cacng5	11:107874604-107915055	Control_PFC	Experimental_PFC	OK	11.0068	1.74748	-2.65505	-9.77995	5e-05	0.000434753	yes
XLOC_007564	XLOC_007564	Rgs9	11:109225354-109298129	Control_PFC	Experimental_PFC	OK	16.6696	47.8111	1.52012	6.13165	5e-05	0.000434753	yes
XLOC_007593	XLOC_007593	Btbd17	11:114791216-114795945	Control_PFC	Experimental_PFC	OK	9.72935	15.0789	0.632112	2.0338	0.00055	0.00378661	yes
XLOC_007608	XLOC_007608	Ush1g	11:115307162-115332303	Control_PFC	Experimental_PFC	OK	1.48996	0.205642	-2.85707	-3.98885	5e-05	0.000434753	yes
XLOC_007611	XLOC_007611	Atp5h	11:115415688-115419962	Control_PFC	Experimental_PFC	OK	167.767	237.222	0.499775	2.22983	5e-05	0.000434753	yes
XLOC_007614	XLOC_007614	Nt5c	11:115475666-115491862	Control_PFC	Experimental_PFC	OK	21.5995	33.4102	0.629289	2.28526	0.00015	0.00118995	yes
XLOC_007709	XLOC_007709	Fam195b	11:120542887-120549727	Control_PFC	Experimental_PFC	OK	25.0845	33.9026	0.434597	2.04946	0.0003	0.00221024	yes
XLOC_007739	XLOC_007739	Wdr45b	11:121327223-121354445	Control_PFC	Experimental_PFC	OK	22.4686	30.435	0.437818	1.58317	0.00575	0.0284944	yes
XLOC_007754	XLOC_007754	Dtnb	12:3572380-3781796	Control_PFC	Experimental_PFC	OK	49.7789	82.947	0.736655	2.81804	5e-05	0.000434753	yes
XLOC_007786	XLOC_007786	Rdh14	12:10390779-10395562	Control_PFC	Experimental_PFC	OK	11.3708	15.213	0.419978	1.83587	0.00175	0.01035	yes
XLOC_007830	XLOC_007830	Iah1	12:21316391-21373632	Control_PFC	Experimental_PFC	OK	4.78225	8.58163	0.843563	1.75272	0.0041	0.0213755	yes
XLOC_007836	XLOC_007836	Grhl1	12:24572286-24617391	Control_PFC	Experimental_PFC	OK	2.5701	1.80481	-0.509973	-1.7147	0.0034	0.0182591	yes
XLOC_007840	XLOC_007840	Mboat2	12:24831598-24960301	Control_PFC	Experimental_PFC	OK	16.3158	24.385	0.57973	2.71785	5e-05	0.000434753	yes
XLOC_007843	XLOC_007843	Cmpk2	12:26469203-26479835	Control_PFC	Experimental_PFC	OK	5.19434	6.94615	0.419274	1.85423	0.00125	0.00774258	yes
XLOC_007849	XLOC_007849	Tssc1	12:28751827-28867491	Control_PFC	Experimental_PFC	OK	18.0076	24.9045	0.467803	2.20007	0.00025	0.00188079	yes
XLOC_007889	XLOC_007889	Agmo	12:37241640-37582202	Control_PFC	Experimental_PFC	OK	2.21994	1.38555	-0.680056	-1.78715	0.0012	0.00747245	yes
XLOC_007918	XLOC_007918	Coch	12:51593340-51605773	Control_PFC	Experimental_PFC	OK	6.02823	12.5264	1.05517	4.68929	5e-05	0.000434753	yes
XLOC_007927	XLOC_007927	Gm22513	12:54696781-54696945	Control_PFC	Experimental_PFC	OK	25.1694	72.9471	1.53518	2.59969	0.00015	0.00118995	yes
XLOC_007935	XLOC_007935	Srp54b	12:55155103-55189213	Control_PFC	Experimental_PFC	OK	5.45013	6.95864	0.352514	1.57715	0.0072	0.0343879	yes
XLOC_007939	XLOC_007939	Psma6	12:55384221-55418454	Control_PFC	Experimental_PFC	OK	39.7013	53.6928	0.435543	2.05249	0.0004	0.00285605	yes
XLOC_007951	XLOC_007951	Sstr1	12:58211771-58214444	Control_PFC	Experimental_PFC	OK	5.6843	7.7974	0.456011	1.76067	0.00195	0.0113736	yes
XLOC_007955	XLOC_007955	Pnn	12:59066918-59074017	Control_PFC	Experimental_PFC	OK	17.5885	11.9517	-0.557414	-2.61042	5e-05	0.000434753	yes
XLOC_007959	XLOC_007959	Gm24233	12:59129719-59191583	Control_PFC	Experimental_PFC	OK	659.67	1710.98	1.375	1.69505	0.00965	0.0439347	yes
XLOC_007974	XLOC_007974	Prpf39	12:65036332-65073944	Control_PFC	Experimental_PFC	OK	10.469	6.69329	-0.645342	-1.73277	0.0028	0.0154813	yes
XLOC_007984	XLOC_007984	Mgat2	12:69184156-69186770	Control_PFC	Experimental_PFC	OK	8.89621	11.8488	0.413484	1.93419	0.001	0.00637663	yes
XLOC_007987	XLOC_007987	Klhdc2	12:69296680-69310687	Control_PFC	Experimental_PFC	OK	48.1811	60.6228	0.331393	1.53726	0.00785	0.0369682	yes
XLOC_008005	XLOC_008005	Dact1	12:71309883-71321660	Control_PFC	Experimental_PFC	OK	1.36128	0.662163	-1.0397	-2.17631	0.0001	0.000825347	yes
XLOC_008015	XLOC_008015	Mnat1	12:73123716-73273988	Control_PFC	Experimental_PFC	OK	7.69548	12.3903	0.687129	2.59378	5e-05	0.000434753	yes
XLOC_008017	XLOC_008017	Prkch	12:73584796-73778185	Control_PFC	Experimental_PFC	OK	2.19187	6.05209	1.46527	5.39437	5e-05	0.000434753	yes
XLOC_008030	XLOC_008030	Hspa2	12:76404175-76406934	Control_PFC	Experimental_PFC	OK	16.3457	12.5076	-0.386104	-1.82116	0.0019	0.0111185	yes
XLOC_008033	XLOC_008033	Plekhg3	12:76533559-76579039	Control_PFC	Experimental_PFC	OK	2.65981	1.93505	-0.458951	-1.78711	0.00185	0.0108623	yes
XLOC_008055	XLOC_008055	Plekhd1	12:80692590-80724214	Control_PFC	Experimental_PFC	OK	1.14853	0.403359	-1.50965	-1.23105	0.00145	0.00880112	yes
XLOC_008059	XLOC_008059	Srsf5	12:80945503-80950507	Control_PFC	Experimental_PFC	OK	140.596	92.6443	-0.601781	-2.13344	0.0001	0.000825347	yes
XLOC_008060	XLOC_008060	Smoc1	12:81026807-81186414	Control_PFC	Experimental_PFC	OK	1.85336	0.815345	-1.18466	-3.32587	5e-05	0.000434753	yes
XLOC_008068	XLOC_008068	Ttc9	12:81631368-81664941	Control_PFC	Experimental_PFC	OK	12.1562	16.5313	0.443503	2.09154	0.0004	0.00285605	yes
XLOC_008106	XLOC_008106	Jdp2	12:85599104-85639878	Control_PFC	Experimental_PFC	OK	22.4341	30.4616	0.441293	2.08972	0.00055	0.00378661	yes
XLOC_008145	XLOC_008145	Adck1	12:88360553-88461719	Control_PFC	Experimental_PFC	OK	11.1289	13.8603	0.316646	1.47922	0.01015	0.0458211	yes
XLOC_008219	XLOC_008219	Glrx5	12:105032688-105040910	Control_PFC	Experimental_PFC	OK	18.3978	26.2075	0.510452	2.22265	0.0002	0.00154481	yes
XLOC_008225	XLOC_008225	Tunar	12:105336593-105383932	Control_PFC	Experimental_PFC	OK	2.94122	1.64881	-0.83499	-2.74534	5e-05	0.000434753	yes
XLOC_008230	XLOC_008230	Gskip	12:105685351-105703047	Control_PFC	Experimental_PFC	OK	7.18048	9.06204	0.335757	1.52617	0.0075	0.0355876	yes
XLOC_008247	XLOC_008247	Cyp46a1	12:108334376-108362231	Control_PFC	Experimental_PFC	OK	52.8076	67.7314	0.35908	1.67358	0.0034	0.0182591	yes
XLOC_008256	XLOC_008256	Dlk1	12:109452822-109463336	Control_PFC	Experimental_PFC	OK	1.35609	0.679796	-0.996278	-1.12275	0.0052	0.0261449	yes
XLOC_008284	XLOC_008284	Gm37899	12:109668868-109677585	Control_PFC	Experimental_PFC	OK	5.39305	4.26162	-0.339698	-1.58341	0.0068	0.0327479	yes
XLOC_008295	XLOC_008295	B830012L14Rik	12:109695585-109702587	Control_PFC	Experimental_PFC	OK	2.8194	1.87442	-0.588943	-2.22712	0.0003	0.00221024	yes
XLOC_008321	XLOC_008321	Mir134,Mir3072,Mir369,Mir377,Mir382,Mir410,Mir412,Mir485,Mir668,Mirg	12:109729763-109749460	Control_PFC	Experimental_PFC	OK	13301.6	8885.63	-0.582057	-481.224	0.00075	0.00496726	yes
XLOC_008338	XLOC_008338	Amn	12:111271110-111276426	Control_PFC	Experimental_PFC	OK	1.14996	1.93837	0.753261	1.7593	0.0037	0.019607	yes
XLOC_008340	XLOC_008340	A230065H16Rik	12:111406808-111412077	Control_PFC	Experimental_PFC	OK	5.38844	0.447725	-3.58918	-3.78811	0.0003	0.00221024	yes
XLOC_008346	XLOC_008346	Trmt61a	12:111678104-111683902	Control_PFC	Experimental_PFC	OK	5.68214	8.0978	0.511096	2.18247	0.0003	0.00221024	yes
XLOC_008354	XLOC_008354	Kif26a	12:112146207-112181747	Control_PFC	Experimental_PFC	OK	2.32769	1.25139	-0.895373	-2.4558	5e-05	0.000434753	yes
XLOC_008356	XLOC_008356	Inf2	12:112588783-112615556	Control_PFC	Experimental_PFC	OK	26.1744	35.1581	0.425701	1.96181	0.0005	0.00348019	yes
XLOC_008358	XLOC_008358	Siva1	12:112644827-112649152	Control_PFC	Experimental_PFC	OK	5.74191	8.30502	0.532455	1.53604	0.0082	0.0383333	yes
XLOC_008363	XLOC_008363	BC022687	12:112808974-112816245	Control_PFC	Experimental_PFC	OK	5.03854	6.88595	0.450649	1.49626	0.00905	0.0416574	yes
XLOC_008369	XLOC_008369	Crip2	12:113140235-113145506	Control_PFC	Experimental_PFC	OK	43.0306	57.3805	0.415197	1.80549	0.0011	0.00692755	yes
XLOC_008372	XLOC_008372	Tmem121	12:113185929-113189523	Control_PFC	Experimental_PFC	OK	5.73516	8.34353	0.540823	2.03674	0.00035	0.00253699	yes
XLOC_008396	XLOC_008396	Vipr2	12:116077725-116146261	Control_PFC	Experimental_PFC	OK	1.89441	0.260095	-2.86464	-1.01003	0.0002	0.00154481	yes
XLOC_008408	XLOC_008408	Sp8	12:118846328-118852578	Control_PFC	Experimental_PFC	OK	5.44346	0.409748	-3.73171	-10.2062	5e-05	0.000434753	yes
XLOC_008424	XLOC_008424	Fam228b	12:4746215-4769267	Control_PFC	Experimental_PFC	OK	2.14399	3.34579	0.64205	2.21302	0.00025	0.00188079	yes
XLOC_008433	XLOC_008433	Rhob	12:8497762-8499985	Control_PFC	Experimental_PFC	OK	58.5032	78.9528	0.432477	1.99214	0.00065	0.00438462	yes
XLOC_008473	XLOC_008473	Itgb1bp1	12:20990458-21286237	Control_PFC	Experimental_PFC	OK	17.8672	35.9478	1.00859	2.13756	0.00095	0.00609393	yes
XLOC_008501	XLOC_008501	Sox11	12:27334263-27342574	Control_PFC	Experimental_PFC	OK	4.02811	2.35623	-0.773625	-3.55004	5e-05	0.000434753	yes
XLOC_008503	XLOC_008503	Dcdc2c	12:28437794-28552303	Control_PFC	Experimental_PFC	OK	4.78095	2.76806	-0.788423	-1.94519	0.00025	0.00188079	yes
XLOC_008508	XLOC_008508	Trappc12	12:28690628-28750453	Control_PFC	Experimental_PFC	OK	18.2118	23.207	0.34969	1.64749	0.00325	0.0175643	yes
XLOC_008526	XLOC_008526	Prkar2b	12:31958475-32061296	Control_PFC	Experimental_PFC	OK	18.9822	25.3195	0.4156	1.84946	0.00145	0.00880112	yes
XLOC_008536	XLOC_008536	Gm18025	12:34290273-34291092	Control_PFC	Experimental_PFC	OK	1.53091	0.574824	-1.4132	-1.9001	0.00425	0.022041	yes
XLOC_008537	XLOC_008537	Hdac9	12:34371502-34528889	Control_PFC	Experimental_PFC	OK	11.4702	6.27925	-0.869229	-4.068	5e-05	0.000434753	yes
XLOC_008542	XLOC_008542	Tspan13	12:36014556-36042500	Control_PFC	Experimental_PFC	OK	51.7755	74.0082	0.515416	2.28912	5e-05	0.000434753	yes
XLOC_008557	XLOC_008557	Lrrn3	12:41024089-41955588	Control_PFC	Experimental_PFC	OK	21.4243	17.1535	-0.320744	-1.46663	0.0111	0.0494223	yes
XLOC_008662	XLOC_008662	Gpr135	12:72069617-72070991	Control_PFC	Experimental_PFC	OK	3.01212	4.67773	0.635028	1.88873	0.0016	0.00958802	yes
XLOC_008693	XLOC_008693	Rab15	12:76765537-76921412	Control_PFC	Experimental_PFC	OK	64.1909	88.5615	0.464311	1.7245	0.0009	0.00581278	yes
XLOC_008703	XLOC_008703	Vti1b	12:79130776-79172667	Control_PFC	Experimental_PFC	OK	68.4351	94.6825	0.468361	1.98423	0.0004	0.00285605	yes
XLOC_008708	XLOC_008708	2310015A10Rik	12:80120547-80132844	Control_PFC	Experimental_PFC	OK	1.64502	1.19164	-0.465158	-1.55521	0.00745	0.0353851	yes
XLOC_008709	XLOC_008709	Actn1	12:80167541-80260371	Control_PFC	Experimental_PFC	OK	26.1472	34.2412	0.389079	1.80515	0.0017	0.0100963	yes
XLOC_008712	XLOC_008712	Gm26777	12:80509950-80518916	Control_PFC	Experimental_PFC	OK	1.39709	0.820704	-0.767487	-1.88587	0.00175	0.01035	yes
XLOC_008721	XLOC_008721	Cox16,Gm20498,Synj2bp	12:81358859-81557458	Control_PFC	Experimental_PFC	OK	51.5911	74.2128	0.524547	1.5457	0.00835	0.03892	yes
XLOC_008737	XLOC_008737	Dpf3	12:83213744-83487716	Control_PFC	Experimental_PFC	OK	3.14257	1.36304	-1.20512	-2.55543	5e-05	0.000434753	yes
XLOC_008752	XLOC_008752	Syndig1l	12:84677277-84698807	Control_PFC	Experimental_PFC	OK	4.03423	13.9949	1.79453	7.292	5e-05	0.000434753	yes
XLOC_008763	XLOC_008763	Acyp1	12:85272397-85288438	Control_PFC	Experimental_PFC	OK	11.2086	17.7463	0.662915	2.23009	5e-05	0.000434753	yes
XLOC_008772	XLOC_008772	Irf2bpl	12:86880702-86884814	Control_PFC	Experimental_PFC	OK	20.0802	24.9168	0.311344	1.47077	0.0112	0.0497926	yes
XLOC_008801	XLOC_008801	Gm25776	12:91555915-91590487	Control_PFC	Experimental_PFC	OK	1781.23	4255.69	1.25652	3.36395	5e-05	0.000434753	yes
XLOC_008802	XLOC_008802	Ston2	12:91638541-91788387	Control_PFC	Experimental_PFC	OK	6.11613	3.49534	-0.807186	-2.00507	0.0001	0.000825347	yes
XLOC_008816	XLOC_008816	Ptpn21	12:98676740-98737405	Control_PFC	Experimental_PFC	OK	1.67284	1.18384	-0.498824	-1.74391	0.0024	0.0135779	yes
XLOC_008817	XLOC_008817	Eml5	12:98746967-98901484	Control_PFC	Experimental_PFC	OK	22.1307	12.8039	-0.789469	-2.78761	5e-05	0.000434753	yes
XLOC_008826	XLOC_008826	Rps6ka5	12:100549777-100725028	Control_PFC	Experimental_PFC	OK	4.81223	7.44801	0.630149	2.94277	5e-05	0.000434753	yes
XLOC_008870	XLOC_008870	Serpina11,Serpina9	12:103980242-104013755	Control_PFC	Experimental_PFC	OK	1.7226	6.10356	1.82506	2.84502	5e-05	0.000434753	yes
XLOC_008879	XLOC_008879	Dicer1	12:104687741-104751952	Control_PFC	Experimental_PFC	OK	8.0471	6.31129	-0.350533	-1.65572	0.0041	0.0213755	yes
XLOC_008883	XLOC_008883	Scarna13	12:105031074-105031349	Control_PFC	Experimental_PFC	OK	461.887	1284.64	1.47575	6.80973	5e-05	0.000434753	yes
XLOC_008897	XLOC_008897	Bcl11b	12:107910402-108003602	Control_PFC	Experimental_PFC	OK	20.9871	27.5331	0.391665	1.57701	0.0061	0.0299196	yes
XLOC_008898	XLOC_008898	Setd3	12:108106430-108179314	Control_PFC	Experimental_PFC	OK	59.9043	86.2722	0.526236	1.7954	0.00115	0.00719815	yes
XLOC_008905	XLOC_008905	Slc25a29	12:108825872-108835883	Control_PFC	Experimental_PFC	OK	4.52278	6.2364	0.463503	1.59169	0.0044	0.0226874	yes
XLOC_008926	XLOC_008926	Cinp	12:110872609-110889145	Control_PFC	Experimental_PFC	OK	12.2084	19.4979	0.675446	3.1157	5e-05	0.000434753	yes
XLOC_008927	XLOC_008927	Ankrd9	12:110975352-110979040	Control_PFC	Experimental_PFC	OK	5.43035	7.8939	0.539693	1.70474	0.00185	0.0108623	yes
XLOC_008938	XLOC_008938	2010107E04Rik	12:111961375-111966977	Control_PFC	Experimental_PFC	OK	124.047	196.141	0.661001	3.09635	5e-05	0.000434753	yes
XLOC_008939	XLOC_008939	Rd3l	12:111971558-112068854	Control_PFC	Experimental_PFC	OK	0.658525	0.0614619	-3.42147	-0.898203	0.0022	0.0126201	yes
XLOC_008943	XLOC_008943	Tmem179	12:112500183-112511160	Control_PFC	Experimental_PFC	OK	36.9993	46.0736	0.316442	1.49145	0.01025	0.046202	yes
XLOC_008947	XLOC_008947	Ahnak2	12:112772193-112802657	Control_PFC	Experimental_PFC	OK	0.714213	0.468036	-0.609736	-1.53396	0.0083	0.0387242	yes
XLOC_008952	XLOC_008952	Nudt14	12:112934732-112942118	Control_PFC	Experimental_PFC	OK	2.82859	4.5814	0.695704	1.65428	0.00595	0.0293067	yes
XLOC_009205	XLOC_009205	Wdr60	12:116207049-116263025	Control_PFC	Experimental_PFC	OK	6.3571	4.62343	-0.459404	-2.05047	0.0002	0.00154481	yes
XLOC_009213	XLOC_009213	Dnah11	12:117804288-118199043	Control_PFC	Experimental_PFC	OK	3.11195	0.142484	-4.44895	-2.5323	5e-05	0.000434753	yes
XLOC_009214	XLOC_009214	Sp4	12:118234932-118301440	Control_PFC	Experimental_PFC	OK	8.96844	6.24004	-0.523302	-2.50281	5e-05	0.000434753	yes
XLOC_009217	XLOC_009217	Itgb8	12:119158021-119238802	Control_PFC	Experimental_PFC	OK	14.6664	9.58165	-0.614171	-2.74991	5e-05	0.000434753	yes
XLOC_009224	XLOC_009224	Asb13	13:3634031-3651774	Control_PFC	Experimental_PFC	OK	16.0239	22.778	0.507416	2.13034	5e-05	0.000434753	yes
XLOC_009240	XLOC_009240	Adarb2	13:8202865-8768747	Control_PFC	Experimental_PFC	OK	17.9507	7.57589	-1.24456	-4.96803	5e-05	0.000434753	yes
XLOC_009259	XLOC_009259	Nid1	13:13437601-13512275	Control_PFC	Experimental_PFC	OK	2.2643	1.13686	-0.994011	-3.63485	5e-05	0.000434753	yes
XLOC_009261	XLOC_009261	Gng4	13:13784058-13827897	Control_PFC	Experimental_PFC	OK	34.7885	5.93745	-2.5507	-9.29659	5e-05	0.000434753	yes
XLOC_009269	XLOC_009269	Inhba	13:16011850-16027211	Control_PFC	Experimental_PFC	OK	6.83439	5.09207	-0.42456	-1.51711	0.009	0.0414631	yes
XLOC_009308	XLOC_009308	Hist1h3h	13:21717658-21718069	Control_PFC	Experimental_PFC	OK	2.23303	7.11478	1.67182	2.76543	0.00015	0.00118995	yes
XLOC_009311	XLOC_009311	Hist1h4j	13:21735063-21735837	Control_PFC	Experimental_PFC	OK	6.4602	10.476	0.697438	2.13777	0.00025	0.00188079	yes
XLOC_009316	XLOC_009316	Hist1h2bp	13:21787460-21789213	Control_PFC	Experimental_PFC	OK	2.70123	7.02616	1.37912	2.63976	5e-05	0.000434753	yes
XLOC_009328	XLOC_009328	Hist1h2bk	13:22035869-22036345	Control_PFC	Experimental_PFC	OK	1.1716	3.16275	1.4327	1.92969	0.00465	0.0237897	yes
XLOC_009330	XLOC_009330	Hist1h2bj	13:22043213-22043676	Control_PFC	Experimental_PFC	OK	1.5159	7.35302	2.27816	3.70403	5e-05	0.000434753	yes
XLOC_009371	XLOC_009371	Gm11331	13:23266533-23266821	Control_PFC	Experimental_PFC	OK	15.2347	7.09134	-1.10323	-2.20286	0.0007	0.00467802	yes
XLOC_009378	XLOC_009378	Hist1h4h	13:23531049-23531522	Control_PFC	Experimental_PFC	OK	104.398	285.831	1.45306	6.82089	5e-05	0.000434753	yes
XLOC_009380	XLOC_009380	Hist1h3g	13:23535433-23535860	Control_PFC	Experimental_PFC	OK	0.836186	3.69908	2.14527	2.77564	0.00235	0.0133425	yes
XLOC_009381	XLOC_009381	Hist1h3f	13:23544464-23545312	Control_PFC	Experimental_PFC	OK	7.34341	28.8484	1.97397	7.11518	5e-05	0.000434753	yes
XLOC_009382	XLOC_009382	Hist1h1d	13:23555086-23555830	Control_PFC	Experimental_PFC	OK	16.4863	27.2758	0.726356	2.91232	5e-05	0.000434753	yes
XLOC_009384	XLOC_009384	Hist1h2bg	13:23571407-23571884	Control_PFC	Experimental_PFC	OK	12.5179	22.8631	0.869031	2.73155	5e-05	0.000434753	yes
XLOC_009385	XLOC_009385	Hist1h2ad	13:23574469-23574932	Control_PFC	Experimental_PFC	OK	0.834249	2.56175	1.61858	1.73018	0.00855	0.0397114	yes
XLOC_009386	XLOC_009386	Hist1h3d	13:23575762-23576322	Control_PFC	Experimental_PFC	OK	7.26407	16.6417	1.19595	3.48764	5e-05	0.000434753	yes
XLOC_009387	XLOC_009387	Hist1h4d	13:23581597-23581990	Control_PFC	Experimental_PFC	OK	196.436	422.217	1.10392	5.12137	5e-05	0.000434753	yes
XLOC_009390	XLOC_009390	Hist1h2bc	13:23684198-23692488	Control_PFC	Experimental_PFC	OK	15.8374	21.9163	0.468665	1.82191	0.0014	0.00853755	yes
XLOC_009393	XLOC_009393	Hist1h1c	13:23738807-23740367	Control_PFC	Experimental_PFC	OK	14.0432	28.8047	1.03643	4.71047	5e-05	0.000434753	yes
XLOC_009395	XLOC_009395	Hist1h2bb	13:23746789-23747241	Control_PFC	Experimental_PFC	OK	8.35851	19.1093	1.19296	3.29821	5e-05	0.000434753	yes
XLOC_009396	XLOC_009396	Hist1h2ab	13:23751125-23751598	Control_PFC	Experimental_PFC	OK	1.98408	4.20994	1.08533	1.79613	0.00425	0.022041	yes
XLOC_009398	XLOC_009398	Hist1h4b	13:23756202-23757620	Control_PFC	Experimental_PFC	OK	12.3532	34.4872	1.48118	4.38007	5e-05	0.000434753	yes
XLOC_009399	XLOC_009399	Hist1h1a	13:23763716-23764358	Control_PFC	Experimental_PFC	OK	6.9512	18.702	1.42786	4.42172	5e-05	0.000434753	yes
XLOC_009408	XLOC_009408	Cmah	13:24327419-24477285	Control_PFC	Experimental_PFC	OK	1.01085	0.463215	-1.12582	-1.85521	5e-05	0.000434753	yes
XLOC_009465	XLOC_009465	Foxc1	13:31806690-31810643	Control_PFC	Experimental_PFC	OK	1.55029	0.903418	-0.779074	-2.29692	0.0002	0.00154481	yes
XLOC_009468	XLOC_009468	Wrnip1	13:32802037-32822609	Control_PFC	Experimental_PFC	OK	15.226	19.0084	0.320093	1.45847	0.0107	0.0478777	yes
XLOC_009491	XLOC_009491	Bphl	13:34037640-34074074	Control_PFC	Experimental_PFC	OK	10.9897	14.1504	0.364686	1.49618	0.0092	0.0422219	yes
XLOC_009495	XLOC_009495	Prpf4b	13:34875493-34902877	Control_PFC	Experimental_PFC	OK	23.6809	18.0018	-0.395585	-1.86497	0.0009	0.00581278	yes
XLOC_009500	XLOC_009500	Cdyl	13:35659861-35874064	Control_PFC	Experimental_PFC	OK	11.0552	25.9027	1.22837	5.73987	5e-05	0.000434753	yes
XLOC_009503	XLOC_009503	Fars2	13:36117410-36537592	Control_PFC	Experimental_PFC	OK	11.2575	16.4159	0.54421	2.55575	5e-05	0.000434753	yes
XLOC_009512	XLOC_009512	Bmp6	13:38345715-38499728	Control_PFC	Experimental_PFC	OK	2.89332	1.68258	-0.782047	-2.37852	0.0002	0.00154481	yes
XLOC_009518	XLOC_009518	Gcnt2	13:40859767-41013019	Control_PFC	Experimental_PFC	OK	7.42129	11.4623	0.627153	2.05751	0.00045	0.00317388	yes
XLOC_009534	XLOC_009534	Edn1	13:42301269-42307989	Control_PFC	Experimental_PFC	OK	0.624754	0.330503	-0.918627	-1.56926	0.0091	0.0418333	yes
XLOC_009536	XLOC_009536	Phactr1	13:42680622-43138526	Control_PFC	Experimental_PFC	OK	95.4216	133.134	0.480496	1.38787	0.0055	0.0274201	yes
XLOC_009548	XLOC_009548	Gmpr	13:45507443-45546382	Control_PFC	Experimental_PFC	OK	20.4769	27.4961	0.425229	1.84287	0.00135	0.00827436	yes
XLOC_009551	XLOC_009551	Rbm24	13:46418299-46431090	Control_PFC	Experimental_PFC	OK	4.82482	6.18227	0.357662	1.54876	0.0066	0.0319756	yes
XLOC_009552	XLOC_009552	Cap2	13:46501847-46649642	Control_PFC	Experimental_PFC	OK	62.7776	84.4415	0.427702	1.59563	0.0019	0.0111185	yes
XLOC_009559	XLOC_009559	Rnf144b	13:47122719-47247991	Control_PFC	Experimental_PFC	OK	4.11326	5.30855	0.368038	1.67599	0.0032	0.0173398	yes
XLOC_009573	XLOC_009573	Ogn	13:49464026-49652746	Control_PFC	Experimental_PFC	OK	2.46293	1.27803	-0.946456	-2.01818	0.00175	0.01035	yes
XLOC_009576	XLOC_009576	Gm25394	13:49682099-49734267	Control_PFC	Experimental_PFC	OK	1653.72	7401.25	2.16206	4.08826	5e-05	0.000434753	yes
XLOC_009604	XLOC_009604	Higd2a	13:54590206-54591158	Control_PFC	Experimental_PFC	OK	49.1344	61.0922	0.314256	1.48858	0.0104	0.0467574	yes
XLOC_009616	XLOC_009616	Prelid1	13:55322054-55329758	Control_PFC	Experimental_PFC	OK	56.0072	87.9284	0.650718	3.0432	5e-05	0.000434753	yes
XLOC_009617	XLOC_009617	Rgs14	13:55369731-55384687	Control_PFC	Experimental_PFC	OK	14.9281	22.0529	0.562934	2.60403	5e-05	0.000434753	yes
XLOC_009621	XLOC_009621	Prr7	13:55464266-55473155	Control_PFC	Experimental_PFC	OK	8.62544	16.8698	0.967776	4.01309	5e-05	0.000434753	yes
XLOC_009625	XLOC_009625	Ddx46	13:55635026-55681256	Control_PFC	Experimental_PFC	OK	11.4458	8.98182	-0.349741	-1.65049	0.0039	0.0204924	yes
XLOC_009627	XLOC_009627	Txndc15	13:55714649-55726221	Control_PFC	Experimental_PFC	OK	26.8193	34.5452	0.365215	1.73187	0.0031	0.0168727	yes
XLOC_009633	XLOC_009633	Fbxl21	13:56522471-56537898	Control_PFC	Experimental_PFC	OK	1.89773	2.93321	0.628206	1.60834	0.00425	0.022041	yes
XLOC_009634	XLOC_009634	Tgfbi	13:56609602-56639339	Control_PFC	Experimental_PFC	OK	1.11089	0.653585	-0.765275	-1.77527	0.00265	0.0147724	yes
XLOC_009636	XLOC_009636	Smad5	13:56703009-56742377	Control_PFC	Experimental_PFC	OK	8.65527	6.47166	-0.419442	-1.53925	0.0037	0.019607	yes
XLOC_009640	XLOC_009640	Idnk	13:58157648-58164693	Control_PFC	Experimental_PFC	OK	4.77438	7.51927	0.655279	2.3194	0.00015	0.00118995	yes
XLOC_009669	XLOC_009669	2010111I01Rik	13:63014933-63497278	Control_PFC	Experimental_PFC	OK	15.5963	20.6894	0.407688	1.73536	0.00275	0.01525	yes
XLOC_009674	XLOC_009674	Ercc6l2	13:63815239-63900302	Control_PFC	Experimental_PFC	OK	6.72393	4.75957	-0.498474	-1.49448	0.00745	0.0353851	yes
XLOC_009708	XLOC_009708	Gm9625	13:67796593-67830985	Control_PFC	Experimental_PFC	OK	9.47744	13.972	0.559965	1.73805	0.00295	0.0161704	yes
XLOC_009727	XLOC_009727	Mrpl36	13:73331008-73332175	Control_PFC	Experimental_PFC	OK	15.7866	24.4677	0.632174	2.64788	5e-05	0.000434753	yes
XLOC_009730	XLOC_009730	Clptm1l	13:73604001-73620639	Control_PFC	Experimental_PFC	OK	28.7751	38.721	0.428297	2.02508	0.0006	0.00409089	yes
XLOC_009733	XLOC_009733	Slc12a7	13:73763696-73816743	Control_PFC	Experimental_PFC	OK	1.21975	0.592337	-1.0421	-2.998	5e-05	0.000434753	yes
XLOC_009754	XLOC_009754	Mctp1	13:76384534-77031810	Control_PFC	Experimental_PFC	OK	30.7811	44.3663	0.527419	2.2114	0.0001	0.000825347	yes
XLOC_009794	XLOC_009794	Rps23	13:90923130-90924942	Control_PFC	Experimental_PFC	OK	187.317	237.327	0.341391	1.58275	0.00505	0.0254967	yes
XLOC_009804	XLOC_009804	Serinc5	13:92611137-92711944	Control_PFC	Experimental_PFC	OK	14.7723	11.4681	-0.36527	-1.72175	0.0031	0.0168727	yes
XLOC_009868	XLOC_009868	Sgtb	13:104109740-104141735	Control_PFC	Experimental_PFC	OK	38.8874	56.689	0.543767	2.31037	0.00015	0.00118995	yes
XLOC_009884	XLOC_009884	Elovl7	13:108214403-108287105	Control_PFC	Experimental_PFC	OK	2.39778	1.77953	-0.430207	-1.67181	0.00375	0.0198305	yes
XLOC_009886	XLOC_009886	Pde4d	13:108449947-109953461	Control_PFC	Experimental_PFC	OK	39.2202	30.5158	-0.362037	-1.41224	0.0102	0.0460195	yes
XLOC_009891	XLOC_009891	Plk2	13:110395043-110400844	Control_PFC	Experimental_PFC	OK	58.7859	79.5938	0.437186	1.95454	0.00085	0.00553519	yes
XLOC_009921	XLOC_009921	Arl15	13:113794504-114157461	Control_PFC	Experimental_PFC	OK	9.10286	12.1893	0.42122	1.98482	0.0005	0.00348019	yes
XLOC_009930	XLOC_009930	Emb	13:117218700-117274098	Control_PFC	Experimental_PFC	OK	8.85372	12.017	0.44072	1.98766	0.00065	0.00438462	yes
XLOC_009933	XLOC_009933	B430218F22Rik	13:118380109-118388124	Control_PFC	Experimental_PFC	OK	1.2223	3.06951	1.32841	2.13022	0.00185	0.0108623	yes
XLOC_009935	XLOC_009935	Fgf10	13:118669790-118792115	Control_PFC	Experimental_PFC	OK	1.20956	0.703638	-0.781579	-1.32011	0.0035	0.0187064	yes
XLOC_009987	XLOC_009987	Actn2	13:12269425-12340760	Control_PFC	Experimental_PFC	OK	6.35389	9.14433	0.525236	2.33674	5e-05	0.000434753	yes
XLOC_010021	XLOC_010021	Epdr1	13:19591708-19619830	Control_PFC	Experimental_PFC	OK	30.9071	49.6646	0.684281	3.21118	5e-05	0.000434753	yes
XLOC_010049	XLOC_010049	Hist1h2bl	13:21715762-21716143	Control_PFC	Experimental_PFC	OK	7.6376	20.2181	1.40446	3.49056	5e-05	0.000434753	yes
XLOC_010052	XLOC_010052	Hist1h4k	13:21750193-21750505	Control_PFC	Experimental_PFC	OK	18.6399	62.2753	1.74027	5.31111	5e-05	0.000434753	yes
XLOC_010053	XLOC_010053	Hist1h2ak	13:21753434-21753827	Control_PFC	Experimental_PFC	OK	6.1405	12.0398	0.971385	2.21478	0.0003	0.00221024	yes
XLOC_010054	XLOC_010054	Hist1h1b	13:21779882-21780625	Control_PFC	Experimental_PFC	OK	4.22385	9.45316	1.16224	3.18781	5e-05	0.000434753	yes
XLOC_010055	XLOC_010055	Hist1h3i	13:21782959-21783370	Control_PFC	Experimental_PFC	OK	11.2191	33.8963	1.59517	4.77084	5e-05	0.000434753	yes
XLOC_010059	XLOC_010059	Hist1h4n	13:21831766-21832196	Control_PFC	Experimental_PFC	OK	17.5557	55.9849	1.6731	5.85622	5e-05	0.000434753	yes
XLOC_010069	XLOC_010069	Hist1h4i	13:22040635-22041362	Control_PFC	Experimental_PFC	OK	27.4549	91.8127	1.74163	7.76197	5e-05	0.000434753	yes
XLOC_010120	XLOC_010120	Hist1h4f	13:23551257-23551648	Control_PFC	Experimental_PFC	OK	33.941	154.284	2.18449	8.7597	5e-05	0.000434753	yes
XLOC_010121	XLOC_010121	Hist1h3e	13:23561533-23562369	Control_PFC	Experimental_PFC	OK	12.8989	32.4394	1.3305	5.39476	5e-05	0.000434753	yes
XLOC_010122	XLOC_010122	Hist1h2ae	13:23570661-23571121	Control_PFC	Experimental_PFC	OK	1.32101	6.30034	2.25378	3.39962	5e-05	0.000434753	yes
XLOC_010125	XLOC_010125	Hist1h2be	13:23583741-23621124	Control_PFC	Experimental_PFC	OK	5.68104	8.03052	0.499339	2.08853	0.00025	0.00188079	yes
XLOC_010126	XLOC_010126	Hist1h1e	13:23621754-23622502	Control_PFC	Experimental_PFC	OK	35.6124	56.748	0.67219	3.11432	5e-05	0.000434753	yes
XLOC_010128	XLOC_010128	Hist1h2ac	13:23683448-23683924	Control_PFC	Experimental_PFC	OK	2.23221	4.27097	0.936094	1.60369	0.0081	0.0379642	yes
XLOC_010129	XLOC_010129	Hist1h4c	13:23698059-23698454	Control_PFC	Experimental_PFC	OK	71.0033	215.226	1.59989	7.23367	5e-05	0.000434753	yes
XLOC_010131	XLOC_010131	Hist1h3c	13:23745012-23745501	Control_PFC	Experimental_PFC	OK	1.1956	4.28684	1.84217	2.68666	0.00045	0.00317388	yes
XLOC_010135	XLOC_010135	Hist1h4a	13:23760691-23761230	Control_PFC	Experimental_PFC	OK	34.8896	137.993	1.98373	8.69298	5e-05	0.000434753	yes
XLOC_010136	XLOC_010136	Hist1h3a	13:23761852-23762386	Control_PFC	Experimental_PFC	OK	3.41159	10.4611	1.61653	3.67391	5e-05	0.000434753	yes
XLOC_010142	XLOC_010142	Scgn	13:23953455-23991214	Control_PFC	Experimental_PFC	OK	5.58742	0.150841	-5.21109	-1.90628	0.0002	0.00154481	yes
XLOC_010143	XLOC_010143	Lrrc16a	13:24012343-24280795	Control_PFC	Experimental_PFC	OK	12.8625	7.38232	-0.801025	-1.66244	0.00055	0.00378661	yes
XLOC_010154	XLOC_010154	Acot13	13:24817947-24831517	Control_PFC	Experimental_PFC	OK	33.7124	44.7819	0.409639	1.87699	0.0014	0.00853755	yes
XLOC_010170	XLOC_010170	Prl8a1	13:27573921-27582171	Control_PFC	Experimental_PFC	OK	3.69885	2.32777	-0.66813	-1.95111	0.00085	0.00553519	yes
XLOC_010180	XLOC_010180	Sox4	13:28943047-28953713	Control_PFC	Experimental_PFC	OK	7.888	4.14153	-0.929497	-4.17415	5e-05	0.000434753	yes
XLOC_010229	XLOC_010229	Nrn1	13:36725624-36734477	Control_PFC	Experimental_PFC	OK	56.7019	72.3367	0.35133	1.6474	0.00385	0.0202747	yes
XLOC_010249	XLOC_010249	Mak	13:41025119-41079706	Control_PFC	Experimental_PFC	OK	0.659308	1.00973	0.61494	1.49904	0.0091	0.0418333	yes
XLOC_010289	XLOC_010289	Gm37238	13:48542643-48545033	Control_PFC	Experimental_PFC	OK	2.35991	1.63939	-0.52557	-1.54331	0.0075	0.0355876	yes
XLOC_010291	XLOC_010291	Ptpdc1	13:48577872-48625573	Control_PFC	Experimental_PFC	OK	7.46988	5.13738	-0.540053	-2.5286	5e-05	0.000434753	yes
XLOC_010308	XLOC_010308	Hist1h2al	13:51202687-51203065	Control_PFC	Experimental_PFC	OK	11.6862	23.5011	1.00792	2.79093	5e-05	0.000434753	yes
XLOC_010321	XLOC_010321	Drd1	13:54051185-54055658	Control_PFC	Experimental_PFC	OK	7.94297	26.2942	1.72699	6.97513	5e-05	0.000434753	yes
XLOC_010325	XLOC_010325	Thoc3	13:54458836-54468849	Control_PFC	Experimental_PFC	OK	9.71988	13.959	0.522185	1.65747	0.0042	0.0218178	yes
XLOC_010331	XLOC_010331	Gprin1	13:54736670-54749874	Control_PFC	Experimental_PFC	OK	37.4195	27.2151	-0.459387	-2.10979	0.0001	0.000825347	yes
XLOC_010349	XLOC_010349	Fam193b	13:55539318-55571120	Control_PFC	Experimental_PFC	OK	15.6267	10.0592	-0.635498	-2.98124	5e-05	0.000434753	yes
XLOC_010363	XLOC_010363	Spock1	13:57421194-57908314	Control_PFC	Experimental_PFC	OK	64.3641	93.9672	0.545902	1.99791	0.0004	0.00285605	yes
XLOC_010368	XLOC_010368	Gkap1	13:58233350-58274188	Control_PFC	Experimental_PFC	OK	6.33501	3.81149	-0.732992	-2.44712	0.0001	0.000825347	yes
XLOC_010418	XLOC_010418	Ptch1	13:63508327-63573598	Control_PFC	Experimental_PFC	OK	12.5573	9.5858	-0.389555	-1.17439	0.00535	0.0267865	yes
XLOC_010423	XLOC_010423	Cdc14b	13:64192544-64274973	Control_PFC	Experimental_PFC	OK	2.79059	3.92582	0.492425	1.74915	0.0024	0.0135779	yes
XLOC_010428	XLOC_010428	Cntnap3	13:64737590-64903888	Control_PFC	Experimental_PFC	OK	3.35467	2.4712	-0.440961	-1.81432	0.0017	0.0100963	yes
XLOC_010472	XLOC_010472	Gm26819	13:69809881-69816094	Control_PFC	Experimental_PFC	OK	3.24748	2.50542	-0.374268	-1.48369	0.0107	0.0478777	yes
XLOC_010475	XLOC_010475	Ice1	13:70588688-70637634	Control_PFC	Experimental_PFC	OK	21.5872	16.1819	-0.415795	-1.91457	0.0006	0.00409089	yes
XLOC_010481	XLOC_010481	Ndufs6	13:73319873-73328542	Control_PFC	Experimental_PFC	OK	45.5159	67.1043	0.560034	2.5591	5e-05	0.000434753	yes
XLOC_010493	XLOC_010493	Pdcd6	13:74303120-74317326	Control_PFC	Experimental_PFC	OK	20.8586	27.432	0.395216	1.87243	0.00125	0.00774258	yes
XLOC_010503	XLOC_010503	Gpr150	13:76054850-76056996	Control_PFC	Experimental_PFC	OK	0.807813	1.39503	0.788205	1.80509	0.00305	0.0166423	yes
XLOC_010520	XLOC_010520	Gm33366	13:83721380-83884194	Control_PFC	Experimental_PFC	OK	8.44456	4.93895	-0.773818	-1.81198	0.00245	0.0138233	yes
XLOC_010526	XLOC_010526	Rasa1	13:85189407-85289029	Control_PFC	Experimental_PFC	OK	33.2765	16.8271	-0.983719	-2.36108	5e-05	0.000434753	yes
XLOC_010528	XLOC_010528	Cox7c	13:86044815-86046904	Control_PFC	Experimental_PFC	OK	162.073	254.154	0.649066	2.99626	5e-05	0.000434753	yes
XLOC_010564	XLOC_010564	Pde8b	13:95024453-95250336	Control_PFC	Experimental_PFC	OK	25.684	37.752	0.555679	1.96762	0.0005	0.00348019	yes
XLOC_010566	XLOC_010566	Crhbp	13:95431370-95444831	Control_PFC	Experimental_PFC	OK	5.4513	7.5349	0.466988	1.7617	0.00305	0.0166423	yes
XLOC_010583	XLOC_010583	Gm10260	13:97751111-97760965	Control_PFC	Experimental_PFC	OK	116.223	156.884	0.432802	2.05027	0.0002	0.00154481	yes
XLOC_010584	XLOC_010584	Arhgef28	13:97898594-98206165	Control_PFC	Experimental_PFC	OK	7.02794	5.0611	-0.47365	-2.24478	5e-05	0.000434753	yes
XLOC_010594	XLOC_010594	Fcho2	13:98723406-98815449	Control_PFC	Experimental_PFC	OK	8.05302	6.09173	-0.402679	-1.87764	0.0011	0.00692755	yes
XLOC_010619	XLOC_010619	Ccnb1	13:100778649-100786570	Control_PFC	Experimental_PFC	OK	1.76075	3.45606	0.972933	2.65198	5e-05	0.000434753	yes
XLOC_010633	XLOC_010633	Srek1	13:103741614-103764504	Control_PFC	Experimental_PFC	OK	15.4553	10.8679	-0.508028	-2.38454	5e-05	0.000434753	yes
XLOC_010634	XLOC_010634	Erbb2ip	13:103818786-103920514	Control_PFC	Experimental_PFC	OK	23.9485	18.8504	-0.345343	-1.58036	0.00615	0.030137	yes
XLOC_010646	XLOC_010646	Kif2a	13:106947128-107022126	Control_PFC	Experimental_PFC	OK	25.1022	16.3885	-0.61513	-2.31477	5e-05	0.000434753	yes
XLOC_010665	XLOC_010665	Map3k1	13:111746427-111808993	Control_PFC	Experimental_PFC	OK	8.23756	2.19804	-1.906	-3.44127	5e-05	0.000434753	yes
XLOC_010672	XLOC_010672	Gpx8	13:113035110-113091195	Control_PFC	Experimental_PFC	OK	2.48669	1.21786	-1.02988	-2.04165	0.0015	0.00906687	yes
XLOC_010675	XLOC_010675	Snx18	13:113592179-113618564	Control_PFC	Experimental_PFC	OK	8.50382	6.83665	-0.314821	-1.48718	0.00915	0.042016	yes
XLOC_010677	XLOC_010677	Ndufs4	13:114287794-114388094	Control_PFC	Experimental_PFC	OK	27.152	33.8161	0.316653	1.48942	0.00925	0.0423983	yes
XLOC_010682	XLOC_010682	Isl1	13:116298280-116309689	Control_PFC	Experimental_PFC	OK	0.856534	2.49227	1.54088	1.63999	0.0023	0.0130957	yes
XLOC_010683	XLOC_010683	Parp8	13:116854823-117025516	Control_PFC	Experimental_PFC	OK	7.81991	4.97623	-0.652101	-2.86957	5e-05	0.000434753	yes
XLOC_010788	XLOC_010788	Flnb	14:7817956-7951588	Control_PFC	Experimental_PFC	OK	12.0565	9.13196	-0.400812	-1.88528	0.00105	0.00665123	yes
XLOC_010805	XLOC_010805	Synpr	14:13284779-13615459	Control_PFC	Experimental_PFC	OK	67.5954	44.2971	-0.609713	-2.63504	5e-05	0.000434753	yes
XLOC_010813	XLOC_010813	Slc4a7	14:14703024-14799943	Control_PFC	Experimental_PFC	OK	5.57752	4.35364	-0.357399	-1.69986	0.00325	0.0175643	yes
XLOC_010818	XLOC_010818	Thrb	14:17660959-18038088	Control_PFC	Experimental_PFC	OK	12.8243	16.8126	0.390665	1.78296	0.0018	0.0106044	yes
XLOC_010841	XLOC_010841	Chchd1	14:20703026-20704417	Control_PFC	Experimental_PFC	OK	24.7877	36.9376	0.575464	2.34666	0.0001	0.000825347	yes
XLOC_010848	XLOC_010848	Kat6b	14:21481433-21672478	Control_PFC	Experimental_PFC	OK	53.9706	83.8989	0.636478	1.62467	0.004	0.0209331	yes
XLOC_010861	XLOC_010861	Rps24	14:24490680-24496146	Control_PFC	Experimental_PFC	OK	286.51	372.372	0.378158	1.76653	0.0024	0.0135779	yes
XLOC_010868	XLOC_010868	Anxa11	14:25842155-25886804	Control_PFC	Experimental_PFC	OK	9.10334	13.2183	0.53807	2.27645	5e-05	0.000434753	yes
XLOC_010892	XLOC_010892	Wnt5a	14:28504749-28527447	Control_PFC	Experimental_PFC	OK	2.86785	1.31181	-1.12842	-1.62678	0.0009	0.00581278	yes
XLOC_010931	XLOC_010931	Vstm4	14:32856755-32939487	Control_PFC	Experimental_PFC	OK	1.70604	0.841521	-1.01958	-2.52898	5e-05	0.000434753	yes
XLOC_010945	XLOC_010945	Rpl23a-ps3	14:34170654-34171168	Control_PFC	Experimental_PFC	OK	1.5392	3.62498	1.23579	1.97954	0.0028	0.0154813	yes
XLOC_011002	XLOC_011002	Gm8113	14:43925389-43933411	Control_PFC	Experimental_PFC	OK	2.55823	1.42742	-0.841737	-2.54804	5e-05	0.000434753	yes
XLOC_011033	XLOC_011033	Styx	14:45351472-45373585	Control_PFC	Experimental_PFC	OK	4.26288	6.95529	0.706283	1.79831	0.0025	0.0140585	yes
XLOC_011052	XLOC_011052	Gm37874	14:47737338-47739894	Control_PFC	Experimental_PFC	OK	1.93238	1.32856	-0.540516	-1.52953	0.0089	0.0410842	yes
XLOC_011053	XLOC_011053	Peli2	14:48120868-48260883	Control_PFC	Experimental_PFC	OK	4.81694	3.31554	-0.538872	-2.41366	5e-05	0.000434753	yes
XLOC_011082	XLOC_011082	Pnp	14:50944301-50965237	Control_PFC	Experimental_PFC	OK	6.86606	9.54201	0.47481	1.6599	0.0043	0.0222504	yes
XLOC_011325	XLOC_011325	Mmp14	14:54431611-54441265	Control_PFC	Experimental_PFC	OK	3.83999	2.1992	-0.80412	-2.24394	5e-05	0.000434753	yes
XLOC_011327	XLOC_011327	Rem2	14:54476099-54480431	Control_PFC	Experimental_PFC	OK	1.91672	5.23545	1.44967	3.63538	5e-05	0.000434753	yes
XLOC_011346	XLOC_011346	Lrrc16b	14:55491092-55508246	Control_PFC	Experimental_PFC	OK	7.42281	4.8624	-0.610297	-2.87216	5e-05	0.000434753	yes
XLOC_011347	XLOC_011347	Cpne6	14:55510444-55517431	Control_PFC	Experimental_PFC	OK	52.4713	32.9307	-0.672095	-2.91664	5e-05	0.000434753	yes
XLOC_011360	XLOC_011360	Nynrin	14:55854035-55874735	Control_PFC	Experimental_PFC	OK	1.00314	0.643511	-0.640484	-1.44572	0.01055	0.0472959	yes
XLOC_011382	XLOC_011382	Mrpl57	14:57826238-57828745	Control_PFC	Experimental_PFC	OK	6.36473	8.28881	0.381065	1.63169	0.0045	0.0231346	yes
XLOC_011395	XLOC_011395	Spata13	14:60634000-60764556	Control_PFC	Experimental_PFC	OK	7.13446	13.1795	0.885415	1.74462	0.00275	0.01525	yes
XLOC_011397	XLOC_011397	Mipep	14:60768133-60903610	Control_PFC	Experimental_PFC	OK	8.5231	14.264	0.742925	3.43032	5e-05	0.000434753	yes
XLOC_011447	XLOC_011447	Adra1a	14:66635250-66733462	Control_PFC	Experimental_PFC	OK	10.7756	5.83671	-0.884548	-3.88085	5e-05	0.000434753	yes
XLOC_011478	XLOC_011478	Phyhip	14:70457475-70468832	Control_PFC	Experimental_PFC	OK	85.6327	116.132	0.439527	1.87027	0.0009	0.00581278	yes
XLOC_011492	XLOC_011492	Gm21750	14:73661224-73662721	Control_PFC	Experimental_PFC	OK	19.211	11.0223	-0.801505	-3.55827	5e-05	0.000434753	yes
XLOC_011494	XLOC_011494	Esd	14:74732296-74750765	Control_PFC	Experimental_PFC	OK	29.2966	48.7383	0.734322	2.89965	5e-05	0.000434753	yes
XLOC_011499	XLOC_011499	Zc3h13	14:75284372-75344426	Control_PFC	Experimental_PFC	OK	11.5827	9.15695	-0.339032	-1.60033	0.00595	0.0293067	yes
XLOC_011519	XLOC_011519	Sugt1	14:79587690-79629755	Control_PFC	Experimental_PFC	OK	22.8944	28.9078	0.336461	1.57525	0.0068	0.0327479	yes
XLOC_011546	XLOC_011546	Klf5	14:99298690-99313405	Control_PFC	Experimental_PFC	OK	1.82163	2.68175	0.557942	1.51232	0.00815	0.0381515	yes
XLOC_011555	XLOC_011555	Gm26778	14:102976580-102982637	Control_PFC	Experimental_PFC	OK	23.4445	15.4886	-0.598048	-2.31296	5e-05	0.000434753	yes
XLOC_011564	XLOC_011564	Ndfip2	14:105258572-105309298	Control_PFC	Experimental_PFC	OK	35.3473	51.8729	0.553381	2.38453	0.0001	0.000825347	yes
XLOC_011585	XLOC_011585	Gpr180	14:118137126-118164232	Control_PFC	Experimental_PFC	OK	5.40773	7.03758	0.380055	1.65141	0.00435	0.0224687	yes
XLOC_011605	XLOC_011605	B930095G15Rik	14:121035199-121283744	Control_PFC	Experimental_PFC	OK	19.879	12.4971	-0.669652	-1.89643	0.00095	0.00609393	yes
XLOC_011612	XLOC_011612	Zic2	14:122475434-122479852	Control_PFC	Experimental_PFC	OK	4.21992	2.13436	-0.983414	-2.69405	5e-05	0.000434753	yes
XLOC_011617	XLOC_011617	Itgbl1	14:123659970-123975618	Control_PFC	Experimental_PFC	OK	4.47897	3.27753	-0.450559	-1.77752	0.0018	0.0106044	yes
XLOC_011726	XLOC_011726	Fezf2	14:12341891-12345865	Control_PFC	Experimental_PFC	OK	5.18583	7.40725	0.514363	2.10119	0.00025	0.00188079	yes
XLOC_011738	XLOC_011738	Rarb	14:16430841-16575472	Control_PFC	Experimental_PFC	OK	4.9696	11.1978	1.17202	5.09162	5e-05	0.000434753	yes
XLOC_011742	XLOC_011742	Rpl15	14:18267822-18331859	Control_PFC	Experimental_PFC	OK	81.474	119.43	0.551748	1.57832	0.0071	0.0339789	yes
XLOC_011754	XLOC_011754	Gng2	14:19872558-19977627	Control_PFC	Experimental_PFC	OK	36.3737	57.7402	0.666679	1.4573	0.00865	0.0401111	yes
XLOC_011755	XLOC_011755	Saysd1	14:20075645-20083172	Control_PFC	Experimental_PFC	OK	2.22194	3.33394	0.585411	1.87857	0.0018	0.0106044	yes
XLOC_011759	XLOC_011759	Ecd	14:20319858-20348121	Control_PFC	Experimental_PFC	OK	11.2189	13.9896	0.318425	1.51592	0.0081	0.0379642	yes
XLOC_011761	XLOC_011761	Mrps16	14:20391230-20393555	Control_PFC	Experimental_PFC	OK	21.8873	30.5274	0.480012	1.86116	0.00115	0.00719815	yes
XLOC_011763	XLOC_011763	Anxa7	14:20455260-20480133	Control_PFC	Experimental_PFC	OK	19.7551	25.7081	0.379996	1.79648	0.00175	0.01035	yes
XLOC_011776	XLOC_011776	Zfp503	14:21983961-21989601	Control_PFC	Experimental_PFC	OK	0.576071	1.18183	1.0367	2.70304	5e-05	0.000434753	yes
XLOC_011786	XLOC_011786	Gm26660	14:25355800-25378635	Control_PFC	Experimental_PFC	OK	1.08377	0.579969	-0.902009	-1.9831	0.00145	0.00880112	yes
XLOC_011812	XLOC_011812	Cacna2d3	14:28904942-29721864	Control_PFC	Experimental_PFC	OK	27.2366	50.0779	0.878626	3.73493	5e-05	0.000434753	yes
XLOC_011814	XLOC_011814	Il17rb	14:29996140-30008896	Control_PFC	Experimental_PFC	OK	1.20361	0.681363	-0.820868	-1.72645	0.00335	0.0180342	yes
XLOC_011815	XLOC_011815	Cacna1d	14:30009022-30527056	Control_PFC	Experimental_PFC	OK	11.3851	7.26787	-0.647541	-2.43062	5e-05	0.000434753	yes
XLOC_011818	XLOC_011818	Itih3	14:30908572-30923760	Control_PFC	Experimental_PFC	OK	17.461	11.3502	-0.621412	-2.03464	0.00035	0.00253699	yes
XLOC_011832	XLOC_011832	Mettl6	14:31478319-31495030	Control_PFC	Experimental_PFC	OK	7.25699	10.8239	0.576782	2.59401	5e-05	0.000434753	yes
XLOC_011838	XLOC_011838	Timm23	14:32180161-32201898	Control_PFC	Experimental_PFC	OK	121.403	554.498	2.19137	6.28836	5e-05	0.000434753	yes
XLOC_011842	XLOC_011842	Chat	14:32408202-32483539	Control_PFC	Experimental_PFC	OK	0.374341	1.48304	1.98613	3.52085	5e-05	0.000434753	yes
XLOC_011843	XLOC_011843	Slc18a3	14:32408202-32483539	Control_PFC	Experimental_PFC	OK	0.252869	0.83792	1.72842	1.99481	0.0008	0.00525136	yes
XLOC_011846	XLOC_011846	Gm15512	14:33214025-33370143	Control_PFC	Experimental_PFC	OK	1.9644	1.07094	-0.875207	-1.86483	0.0023	0.0130957	yes
XLOC_011848	XLOC_011848	Zfp488	14:33967069-33978764	Control_PFC	Experimental_PFC	OK	23.7537	15.4987	-0.616003	-2.89987	5e-05	0.000434753	yes
XLOC_011864	XLOC_011864	Cdhr1	14:37077849-37098311	Control_PFC	Experimental_PFC	OK	20.485	0.720809	-4.8288	-14.9794	5e-05	0.000434753	yes
XLOC_012116	XLOC_012116	Efs	14:54916542-54926788	Control_PFC	Experimental_PFC	OK	2.55399	1.5905	-0.683277	-2.29784	5e-05	0.000434753	yes
XLOC_012135	XLOC_012135	Nedd8	14:55662264-55671906	Control_PFC	Experimental_PFC	OK	85.6215	107.577	0.329319	1.53144	0.0084	0.0391051	yes
XLOC_012139	XLOC_012139	Rabggta	14:55715872-55722257	Control_PFC	Experimental_PFC	OK	14.2906	18.1874	0.347873	1.60357	0.00485	0.0246483	yes
XLOC_012144	XLOC_012144	Gm26751	14:55854035-55874735	Control_PFC	Experimental_PFC	OK	1.92604	1.22962	-0.647431	-1.59786	0.00545	0.0272053	yes
XLOC_012146	XLOC_012146	Sdr39u1	14:55897285-55900232	Control_PFC	Experimental_PFC	OK	16.9016	21.3134	0.334601	1.51198	0.00855	0.0397114	yes
XLOC_012164	XLOC_012164	Pspc1	14:56722440-56778316	Control_PFC	Experimental_PFC	OK	29.0243	19.3829	-0.582472	-1.9041	0.00125	0.00774258	yes
XLOC_012172	XLOC_012172	Gjb2	14:57098599-57104702	Control_PFC	Experimental_PFC	OK	2.94523	1.24011	-1.24791	-3.58144	5e-05	0.000434753	yes
XLOC_012179	XLOC_012179	N6amt2	14:57549597-57571569	Control_PFC	Experimental_PFC	OK	15.8933	25.8551	0.702027	2.89869	5e-05	0.000434753	yes
XLOC_012213	XLOC_012213	Gm37472	14:61598225-61682373	Control_PFC	Experimental_PFC	OK	2.72189	1.58533	-0.779822	-1.49269	0.0103	0.0463783	yes
XLOC_012229	XLOC_012229	Mtmr9	14:63523615-63543953	Control_PFC	Experimental_PFC	OK	25.3959	32.3164	0.347668	1.64041	0.00455	0.0233511	yes
XLOC_012235	XLOC_012235	Msra	14:64122622-64455903	Control_PFC	Experimental_PFC	OK	14.004	18.2414	0.381382	1.80435	0.00215	0.0123726	yes
XLOC_012236	XLOC_012236	Hmbox1	14:64811599-64949871	Control_PFC	Experimental_PFC	OK	22.2485	15.6627	-0.506375	-1.90533	0.0022	0.0126201	yes
XLOC_012253	XLOC_012253	Ppp2r2a	14:67014056-67072471	Control_PFC	Experimental_PFC	OK	12.1614	15.6086	0.360029	1.68733	0.004	0.0209331	yes
XLOC_012286	XLOC_012286	Chmp7	14:69716978-69732570	Control_PFC	Experimental_PFC	OK	23.7709	30.0309	0.337253	1.5957	0.00645	0.0313746	yes
XLOC_012299	XLOC_012299	Bmp1	14:70474556-70520260	Control_PFC	Experimental_PFC	OK	9.50299	7.23438	-0.393513	-1.86442	0.0012	0.00747245	yes
XLOC_012301	XLOC_012301	Fam160b2	14:70583295-70599835	Control_PFC	Experimental_PFC	OK	7.97339	9.95137	0.319702	1.52329	0.0076	0.0360012	yes
XLOC_012302	XLOC_012302	Dmtn	14:70602183-70636048	Control_PFC	Experimental_PFC	OK	66.796	87.4794	0.389181	1.62698	0.00515	0.0259278	yes
XLOC_012336	XLOC_012336	Serp2	14:76532813-76556687	Control_PFC	Experimental_PFC	OK	46.68	77.9627	0.739979	3.49195	5e-05	0.000434753	yes
XLOC_012342	XLOC_012342	Dnajc15	14:77826216-77874917	Control_PFC	Experimental_PFC	OK	22.9625	31.7127	0.465783	1.91416	0.00035	0.00253699	yes
XLOC_012349	XLOC_012349	Dgkh	14:78569608-78725089	Control_PFC	Experimental_PFC	OK	19.4377	25.2529	0.377597	1.77707	0.00225	0.0128619	yes
XLOC_012351	XLOC_012351	Rgcc	14:79288755-79301645	Control_PFC	Experimental_PFC	OK	16.6965	22.4942	0.430007	1.81566	0.0022	0.0126201	yes
XLOC_012364	XLOC_012364	Rps3a2	14:88123016-88123808	Control_PFC	Experimental_PFC	OK	20.9623	26.8827	0.358882	1.52529	0.00835	0.03892	yes
XLOC_012366	XLOC_012366	Pcdh20	14:88464742-88471396	Control_PFC	Experimental_PFC	OK	11.3962	5.53172	-1.04275	-4.30903	5e-05	0.000434753	yes
XLOC_012373	XLOC_012373	Klhl1	14:96105258-96519102	Control_PFC	Experimental_PFC	OK	1.90668	0.899092	-1.08452	-3.31176	5e-05	0.000434753	yes
XLOC_012376	XLOC_012376	Dach1	14:97786852-98169765	Control_PFC	Experimental_PFC	OK	1.28165	3.84045	1.58327	5.71898	5e-05	0.000434753	yes
XLOC_012393	XLOC_012393	Commd6	14:101633765-101640686	Control_PFC	Experimental_PFC	OK	10.662	14.815	0.474572	1.74011	0.0026	0.0145401	yes
XLOC_012402	XLOC_012402	Ednrb	14:103814624-103844173	Control_PFC	Experimental_PFC	OK	12.2038	8.18029	-0.57711	-2.74454	5e-05	0.000434753	yes
XLOC_012430	XLOC_012430	Dct	14:118012791-118052246	Control_PFC	Experimental_PFC	OK	1.16467	0.324547	-1.84343	-3.31481	5e-05	0.000434753	yes
XLOC_012437	XLOC_012437	Dzip1	14:118875519-118925314	Control_PFC	Experimental_PFC	OK	13.9465	10.0819	-0.468135	-2.20099	0.0001	0.000825347	yes
XLOC_012464	XLOC_012464	Plcxd3	15:4375490-4575553	Control_PFC	Experimental_PFC	OK	10.357	6.59289	-0.651627	-2.69253	5e-05	0.000434753	yes
XLOC_012469	XLOC_012469	Rpl37	15:5116612-5119140	Control_PFC	Experimental_PFC	OK	123.075	204.088	0.729658	3.40321	5e-05	0.000434753	yes
XLOC_012490	XLOC_012490	Ranbp3l	15:8968425-9066551	Control_PFC	Experimental_PFC	OK	2.24292	0.844218	-1.40969	-1.59702	0.00115	0.00719815	yes
XLOC_012502	XLOC_012502	Amacr	15:10981755-10996624	Control_PFC	Experimental_PFC	OK	2.53509	3.93649	0.63487	2.20705	0.0003	0.00221024	yes
XLOC_012509	XLOC_012509	Mtmr12	15:12205027-12272240	Control_PFC	Experimental_PFC	OK	11.9842	20.3899	0.766722	2.50226	5e-05	0.000434753	yes
XLOC_012517	XLOC_012517	Cdh9	15:16778100-16857094	Control_PFC	Experimental_PFC	OK	5.53744	7.71341	0.478149	2.14253	0.00015	0.00118995	yes
XLOC_012532	XLOC_012532	Myo10	15:25622524-25813673	Control_PFC	Experimental_PFC	OK	16.7545	10.3324	-0.697377	-1.6267	0.0033	0.0177984	yes
XLOC_012536	XLOC_012536	Zfp622	15:25984365-25998482	Control_PFC	Experimental_PFC	OK	7.39075	10.799	0.547103	2.53229	5e-05	0.000434753	yes
XLOC_012540	XLOC_012540	Dnah5	15:28203751-28472045	Control_PFC	Experimental_PFC	OK	0.631365	0.441799	-0.515085	-1.83491	0.00165	0.00984883	yes
XLOC_012558	XLOC_012558	Kcns2	15:34837380-34842337	Control_PFC	Experimental_PFC	OK	7.35916	9.93095	0.432391	2.01798	0.0007	0.00467802	yes
XLOC_012567	XLOC_012567	AC137871.1	15:36583543-36583669	Control_PFC	Experimental_PFC	OK	29.371	0	#NAME?	#NAME?	0.0001	0.000825347	yes
XLOC_012581	XLOC_012581	Atp6v1c1	15:38661903-38692443	Control_PFC	Experimental_PFC	OK	73.8546	95.4431	0.369953	1.68303	0.00285	0.015712	yes
XLOC_012583	XLOC_012583	Fzd6	15:39006279-39038186	Control_PFC	Experimental_PFC	OK	2.07699	1.34828	-0.623375	-2.07675	0.00065	0.00438462	yes
XLOC_012598	XLOC_012598	Trhr	15:44196134-44235912	Control_PFC	Experimental_PFC	OK	1.05443	0.594337	-0.827117	-1.76402	0.0026	0.0145401	yes
XLOC_012623	XLOC_012623	Mal2	15:54571365-54602846	Control_PFC	Experimental_PFC	OK	49.6127	68.9365	0.474557	2.14834	0.00015	0.00118995	yes
XLOC_012624	XLOC_012624	Nov	15:54745701-54754039	Control_PFC	Experimental_PFC	OK	23.8504	18.8817	-0.337025	-1.5896	0.0068	0.0327479	yes
XLOC_012633	XLOC_012633	Wdyhv1	15:58141435-58158652	Control_PFC	Experimental_PFC	OK	5.47035	7.82722	0.516866	1.80314	0.002	0.0116276	yes
XLOC_012641	XLOC_012641	Ndufb9	15:58933809-58939489	Control_PFC	Experimental_PFC	OK	150.803	244.854	0.699256	3.27577	5e-05	0.000434753	yes
XLOC_012649	XLOC_012649	9930014A18Rik	15:60818993-60853778	Control_PFC	Experimental_PFC	OK	1.7615	2.80551	0.671454	1.68256	0.0021	0.0121275	yes
XLOC_012670	XLOC_012670	Phf20l1	15:66577571-66645255	Control_PFC	Experimental_PFC	OK	10.8811	8.74749	-0.314878	-1.48539	0.00985	0.0447019	yes
XLOC_012672	XLOC_012672	Wisp1	15:66891319-66923201	Control_PFC	Experimental_PFC	OK	2.03813	0.870325	-1.22762	-1.74706	0.00045	0.00317388	yes
XLOC_012679	XLOC_012679	Khdrbs3	15:68928419-69093512	Control_PFC	Experimental_PFC	OK	59.1871	73.9776	0.321807	1.49205	0.0089	0.0410842	yes
XLOC_012694	XLOC_012694	Them6	15:74721203-74728034	Control_PFC	Experimental_PFC	OK	12.4286	23.5616	0.922769	3.98897	5e-05	0.000434753	yes
XLOC_012739	XLOC_012739	Mfsd3	15:76701541-76710559	Control_PFC	Experimental_PFC	OK	1.24402	2.05682	0.725402	1.65929	0.00625	0.0305581	yes
XLOC_012743	XLOC_012743	Commd5	15:76899909-76901305	Control_PFC	Experimental_PFC	OK	11.6224	18.8139	0.694899	2.75868	5e-05	0.000434753	yes
XLOC_012761	XLOC_012761	Kctd17	15:78428563-78438909	Control_PFC	Experimental_PFC	OK	54.9947	72.7324	0.403306	1.8004	0.0017	0.0100963	yes
XLOC_012766	XLOC_012766	Sh3bp1	15:78899666-78919517	Control_PFC	Experimental_PFC	OK	64.8681	94.5241	0.543172	2.44779	5e-05	0.000434753	yes
XLOC_012767	XLOC_012767	Lgals1	15:78926724-78930465	Control_PFC	Experimental_PFC	OK	9.81735	18.3763	0.904437	3.25321	5e-05	0.000434753	yes
XLOC_012772	XLOC_012772	Gcat	15:79030873-79043558	Control_PFC	Experimental_PFC	OK	3.30033	4.52076	0.453958	1.5714	0.00525	0.0263478	yes
XLOC_012775	XLOC_012775	Polr2f	15:79141350-79151774	Control_PFC	Experimental_PFC	OK	26.457	38.7283	0.549735	2.2175	0.0001	0.000825347	yes
XLOC_012784	XLOC_012784	Tomm22	15:79670860-79672862	Control_PFC	Experimental_PFC	OK	28.6005	39.6034	0.469584	2.19502	0.0001	0.000825347	yes
XLOC_012805	XLOC_012805	Mchr1	15:81235498-81238963	Control_PFC	Experimental_PFC	OK	6.81011	10.9064	0.679423	2.95295	5e-05	0.000434753	yes
XLOC_012814	XLOC_012814	Csdc2	15:81936758-81950941	Control_PFC	Experimental_PFC	OK	40.3426	18.6795	-1.11085	-5.01329	5e-05	0.000434753	yes
XLOC_012826	XLOC_012826	Fam109b,Smdt1	15:82338941-82349091	Control_PFC	Experimental_PFC	OK	85.3839	123.063	0.527358	2.40628	5e-05	0.000434753	yes
XLOC_012836	XLOC_012836	Rnu12	15:83149643-83149794	Control_PFC	Experimental_PFC	OK	2446.57	8801.53	1.84699	8.54103	5e-05	0.000434753	yes
XLOC_012855	XLOC_012855	Fbln1	15:85205948-85286535	Control_PFC	Experimental_PFC	OK	2.58644	1.74909	-0.564365	-1.51937	0.00585	0.0289118	yes
XLOC_012860	XLOC_012860	Gm37699	15:85655665-85659003	Control_PFC	Experimental_PFC	OK	1.5898	0.820687	-0.953944	-2.61111	5e-05	0.000434753	yes
XLOC_012878	XLOC_012878	Pim3	15:88862185-88865718	Control_PFC	Experimental_PFC	OK	8.7006	14.9974	0.78553	3.67237	5e-05	0.000434753	yes
XLOC_012911	XLOC_012911	Tmem117	15:94629184-95096097	Control_PFC	Experimental_PFC	OK	3.07356	2.08128	-0.562437	-1.87567	0.00155	0.00932883	yes
XLOC_012913	XLOC_012913	Ano6	15:95787855-95975464	Control_PFC	Experimental_PFC	OK	6.1189	3.7763	-0.696299	-3.12719	5e-05	0.000434753	yes
XLOC_012925	XLOC_012925	Ccdc184	15:98167805-98170134	Control_PFC	Experimental_PFC	OK	6.93623	10.518	0.600631	2.65406	5e-05	0.000434753	yes
XLOC_012956	XLOC_012956	Cox14	15:99725617-99728136	Control_PFC	Experimental_PFC	OK	35.938	53.6437	0.5779	2.69765	5e-05	0.000434753	yes
XLOC_012982	XLOC_012982	Atg101	15:101284300-101290934	Control_PFC	Experimental_PFC	OK	14.9784	19.7169	0.396554	1.75872	0.00205	0.0118768	yes
XLOC_012997	XLOC_012997	Tns2	15:102102987-102116401	Control_PFC	Experimental_PFC	OK	2.68449	2.0002	-0.424506	-1.63213	0.00435	0.0224687	yes
XLOC_012998	XLOC_012998	Igfbp6	15:102144361-102149511	Control_PFC	Experimental_PFC	OK	31.36	51.2643	0.709027	3.36388	5e-05	0.000434753	yes
XLOC_013004	XLOC_013004	Myg1,Pfdn5	15:102326115-102338139	Control_PFC	Experimental_PFC	OK	150.73	201.921	0.421827	1.60441	0.00515	0.0259278	yes
XLOC_013029	XLOC_013029	Hnrnpa1	15:103240431-103244955	Control_PFC	Experimental_PFC	OK	73.1224	57.1852	-0.354671	-1.67261	0.003	0.0164048	yes
XLOC_013034	XLOC_013034	Pde1b	15:103503297-103530052	Control_PFC	Experimental_PFC	OK	54.8144	130.013	1.24603	5.08524	5e-05	0.000434753	yes
XLOC_013052	XLOC_013052	Egflam	15:7206119-7411381	Control_PFC	Experimental_PFC	OK	1.27835	0.566942	-1.17301	-1.16058	0.0037	0.019607	yes
XLOC_013055	XLOC_013055	Nipbl	15:8291224-8444463	Control_PFC	Experimental_PFC	OK	12.594	9.85922	-0.353191	-1.66052	0.0034	0.0182591	yes
XLOC_013118	XLOC_013118	Tspyl5	15:33683875-33687883	Control_PFC	Experimental_PFC	OK	11.8273	14.7049	0.314184	1.46988	0.0086	0.0399088	yes
XLOC_013125	XLOC_013125	Stk3	15:34875495-35155806	Control_PFC	Experimental_PFC	OK	13.7871	23.8253	0.789179	2.81605	5e-05	0.000434753	yes
XLOC_013175	XLOC_013175	Kcnv1	15:45106283-45114934	Control_PFC	Experimental_PFC	OK	24.8432	33.8409	0.445917	2.06121	0.0003	0.00221024	yes
XLOC_013202	XLOC_013202	Sntb1	15:55638842-55906949	Control_PFC	Experimental_PFC	OK	1.37831	0.557877	-1.30488	-1.78265	0.00205	0.0118768	yes
XLOC_013213	XLOC_013213	Fbxo32	15:58175878-58324169	Control_PFC	Experimental_PFC	OK	3.47031	4.73901	0.449521	2.06468	0.0001	0.000825347	yes
XLOC_013221	XLOC_013221	Mtss1	15:58941243-59082026	Control_PFC	Experimental_PFC	OK	5.73258	3.84781	-0.575145	-2.64125	5e-05	0.000434753	yes
XLOC_013239	XLOC_013239	Adcy8	15:64699041-64937996	Control_PFC	Experimental_PFC	OK	8.96037	5.43848	-0.720354	-3.34654	5e-05	0.000434753	yes
XLOC_013252	XLOC_013252	Gm37320	15:68321380-68326333	Control_PFC	Experimental_PFC	OK	0.730148	0.411756	-0.826398	-2.02606	0.00105	0.00665123	yes
XLOC_013280	XLOC_013280	Lynx1	15:74747851-74753046	Control_PFC	Experimental_PFC	OK	78.0665	103.123	0.401591	1.52811	0.00415	0.0216013	yes
XLOC_013305	XLOC_013305	Ly6h	15:75551267-75567255	Control_PFC	Experimental_PFC	OK	67.2882	88.4417	0.394374	1.79854	0.00135	0.00827436	yes
XLOC_013313	XLOC_013313	Pycrl	15:75916462-75921560	Control_PFC	Experimental_PFC	OK	7.73051	11.0778	0.519033	2.02979	0.00035	0.00253699	yes
XLOC_013314	XLOC_013314	Tsta3	15:75924683-75929730	Control_PFC	Experimental_PFC	OK	6.20381	8.498	0.45397	1.6393	0.00505	0.0254967	yes
XLOC_013320	XLOC_013320	Nrbp2	15:76085594-76090013	Control_PFC	Experimental_PFC	OK	19.4408	15.0038	-0.373759	-1.75214	0.00215	0.0123726	yes
XLOC_013336	XLOC_013336	Tonsl	15:76622087-76639958	Control_PFC	Experimental_PFC	OK	59.3639	78.6832	0.406469	1.75128	0.002	0.0116276	yes
XLOC_013364	XLOC_013364	Pvalb	15:78191113-78206400	Control_PFC	Experimental_PFC	OK	26.0976	61.131	1.22799	5.626	5e-05	0.000434753	yes
XLOC_013376	XLOC_013376	Card10	15:78775137-78803042	Control_PFC	Experimental_PFC	OK	1.22334	0.781041	-0.64736	-1.39344	0.0081	0.0379642	yes
XLOC_013395	XLOC_013395	Josd1	15:79674249-79687872	Control_PFC	Experimental_PFC	OK	22.0963	27.8325	0.332964	1.5761	0.0054	0.0269987	yes
XLOC_013407	XLOC_013407	Rps19bp1	15:80260613-80264306	Control_PFC	Experimental_PFC	OK	10.2447	17.4808	0.770887	2.83014	5e-05	0.000434753	yes
XLOC_013419	XLOC_013419	Rangap1	15:81704247-81729919	Control_PFC	Experimental_PFC	OK	66.8624	96.1182	0.523614	2.30399	5e-05	0.000434753	yes
XLOC_013428	XLOC_013428	Shisa8	15:82206951-82212815	Control_PFC	Experimental_PFC	OK	6.44051	0.646392	-3.31669	-7.6855	5e-05	0.000434753	yes
XLOC_013452	XLOC_013452	A4galt	15:83226725-83251774	Control_PFC	Experimental_PFC	OK	1.13791	0.700251	-0.700442	-1.50123	0.0103	0.0463783	yes
XLOC_013455	XLOC_013455	Pacsin2	15:83375606-83464606	Control_PFC	Experimental_PFC	OK	22.8084	12.6418	-0.851358	-3.89339	5e-05	0.000434753	yes
XLOC_013462	XLOC_013462	Sult4a1	15:84076096-84105754	Control_PFC	Experimental_PFC	OK	115.065	161.733	0.491161	2.03391	0.0004	0.00285605	yes
XLOC_013465	XLOC_013465	1810041L15Rik	15:84379202-84447097	Control_PFC	Experimental_PFC	OK	10.4149	6.49873	-0.680414	-2.24686	0.0001	0.000825347	yes
XLOC_013474	XLOC_013474	Cdpf1	15:85806971-85811697	Control_PFC	Experimental_PFC	OK	3.77103	6.59108	0.805556	2.05219	0.00035	0.00253699	yes
XLOC_013476	XLOC_013476	Celsr1	15:85898757-86033777	Control_PFC	Experimental_PFC	OK	1.82845	1.22563	-0.577093	-2.47952	5e-05	0.000434753	yes
XLOC_013482	XLOC_013482	Alg12	15:88805243-88819318	Control_PFC	Experimental_PFC	OK	4.06471	5.4046	0.411034	1.47299	0.00965	0.0439347	yes
XLOC_013489	XLOC_013489	Mapk11	15:89142485-89149606	Control_PFC	Experimental_PFC	OK	17.1244	21.2449	0.311065	1.45342	0.01015	0.0458211	yes
XLOC_013490	XLOC_013490	Plxnb2	15:89155548-89171120	Control_PFC	Experimental_PFC	OK	13.716	9.48937	-0.531476	-1.64438	0.00055	0.00378661	yes
XLOC_013492	XLOC_013492	Dennd6b	15:89182216-89196474	Control_PFC	Experimental_PFC	OK	8.81578	7.03962	-0.324591	-1.54746	0.0059	0.0291076	yes
XLOC_013494	XLOC_013494	Gm26798	15:89211558-89215012	Control_PFC	Experimental_PFC	OK	0.829055	0.49416	-0.746491	-1.60312	0.00725	0.0345895	yes
XLOC_013505	XLOC_013505	Syt10	15:89782392-89841860	Control_PFC	Experimental_PFC	OK	11.537	4.87258	-1.24351	-4.85676	5e-05	0.000434753	yes
XLOC_013508	XLOC_013508	Cpne8	15:90487481-90679432	Control_PFC	Experimental_PFC	OK	10.438	5.9655	-0.807133	-1.905	0.00085	0.00553519	yes
XLOC_013511	XLOC_013511	Abcd2	15:91145883-91191807	Control_PFC	Experimental_PFC	OK	7.38604	10.0464	0.443808	2.08187	0.0003	0.00221024	yes
XLOC_013512	XLOC_013512	Slc2a13	15:91267695-91573261	Control_PFC	Experimental_PFC	OK	23.8357	33.6768	0.498633	1.81442	0.0004	0.00285605	yes
XLOC_013534	XLOC_013534	2610037D02Rik	15:96134818-96284495	Control_PFC	Experimental_PFC	OK	3.41879	2.09306	-0.70787	-2.40524	0.0001	0.000825347	yes
XLOC_013541	XLOC_013541	Amigo2	15:97244073-97385689	Control_PFC	Experimental_PFC	OK	4.25902	2.14299	-0.990895	-2.90446	5e-05	0.000434753	yes
XLOC_013544	XLOC_013544	Rapgef3	15:97744769-97768713	Control_PFC	Experimental_PFC	OK	14.3169	9.76726	-0.551691	-1.48069	0.0063	0.0307574	yes
XLOC_013560	XLOC_013560	Snora34,mmu-mir-1291	15:98518820-98534244	Control_PFC	Experimental_PFC	OK	258.624	951.971	1.88006	2.69316	5e-05	0.000434753	yes
XLOC_013583	XLOC_013583	Fmnl3	15:99317224-99370482	Control_PFC	Experimental_PFC	OK	3.07471	1.89112	-0.701212	-1.77888	0.00125	0.00774258	yes
XLOC_013609	XLOC_013609	Cela1	15:100674424-100687920	Control_PFC	Experimental_PFC	OK	0.477385	1.07806	1.17522	1.70532	0.00745	0.0353851	yes
XLOC_013613	XLOC_013613	A330009N23Rik	15:101221195-101224121	Control_PFC	Experimental_PFC	OK	5.40842	7.80647	0.529464	1.8803	0.00165	0.00984883	yes
XLOC_013614	XLOC_013614	Krt80	15:101349570-101370125	Control_PFC	Experimental_PFC	OK	1.17307	1.99356	0.76506	1.84169	0.00245	0.0138233	yes
XLOC_013644	XLOC_013644	Sp7	15:102356608-102366325	Control_PFC	Experimental_PFC	OK	3.80594	0.179031	-4.40997	-7.59266	5e-05	0.000434753	yes
XLOC_013661	XLOC_013661	Itga5	15:103344288-103366763	Control_PFC	Experimental_PFC	OK	0.603613	1.4022	1.216	3.37541	5e-05	0.000434753	yes
XLOC_013665	XLOC_013665	Ppp1r1a	15:103530278-103537992	Control_PFC	Experimental_PFC	OK	35.5903	45.9409	0.368293	1.72592	0.00325	0.0175643	yes
XLOC_013688	XLOC_013688	4930562C15Rik	16:4835415-4867691	Control_PFC	Experimental_PFC	OK	0.659096	0.233194	-1.49896	-0.947683	0.00885	0.0408835	yes
XLOC_013701	XLOC_013701	Rbfox1	16:6809221-7412479	Control_PFC	Experimental_PFC	OK	78.2698	106.249	0.440928	1.55121	0.00655	0.0317811	yes
XLOC_013705	XLOC_013705	Mettl22	16:8470787-8490684	Control_PFC	Experimental_PFC	OK	8.47858	14.0576	0.72946	1.99023	0.00075	0.00496726	yes
XLOC_013743	XLOC_013743	2900011O08Rik	16:13981701-14101500	Control_PFC	Experimental_PFC	OK	74.5835	98.5384	0.401831	1.65996	0.0031	0.0168727	yes
XLOC_013754	XLOC_013754	Gm21897	16:15317457-15318957	Control_PFC	Experimental_PFC	OK	35.8001	21.5427	-0.732766	-3.46093	5e-05	0.000434753	yes
XLOC_013758	XLOC_013758	Pkp2	16:16213317-16272712	Control_PFC	Experimental_PFC	OK	1.42532	2.14784	0.5916	1.74827	0.003	0.0164048	yes
XLOC_013764	XLOC_013764	1700056N10Rik	16:17047519-17049111	Control_PFC	Experimental_PFC	OK	2.61714	1.56769	-0.739348	-1.6131	0.0062	0.0303457	yes
XLOC_013779	XLOC_013779	Smpd4	16:17619353-17644828	Control_PFC	Experimental_PFC	OK	26.2231	18.6965	-0.488075	-1.50942	0.0062	0.0303457	yes
XLOC_013782	XLOC_013782	Klhl22	16:17759617-17793382	Control_PFC	Experimental_PFC	OK	29.6013	41.9157	0.501832	1.5782	0.0062	0.0303457	yes
XLOC_013789	XLOC_013789	Rtn4r	16:18127641-18152408	Control_PFC	Experimental_PFC	OK	24.111	32.5115	0.431261	2.02135	0.0004	0.00285605	yes
XLOC_013798	XLOC_013798	Cldn5	16:18776846-18778260	Control_PFC	Experimental_PFC	OK	17.4621	22.5424	0.368415	1.72214	0.0032	0.0173398	yes
XLOC_013817	XLOC_013817	Eif2b5	16:20498816-20509955	Control_PFC	Experimental_PFC	OK	14.8097	19.2888	0.381222	1.7819	0.00175	0.01035	yes
XLOC_013828	XLOC_013828	Fam131a	16:20693281-20722267	Control_PFC	Experimental_PFC	OK	79.4418	116.51	0.552488	1.85052	0.00085	0.00553519	yes
XLOC_013864	XLOC_013864	Lpp	16:24391611-24992576	Control_PFC	Experimental_PFC	OK	1.35044	0.992055	-0.444943	-1.91198	0.0008	0.00525136	yes
XLOC_013876	XLOC_013876	Hrasls	16:29209694-29230531	Control_PFC	Experimental_PFC	OK	6.14479	9.86706	0.683256	1.74551	0.00435	0.0224687	yes
XLOC_013886	XLOC_013886	Bdh1	16:31422279-31458901	Control_PFC	Experimental_PFC	OK	24.5915	36.9329	0.58675	1.73619	0.00245	0.0138233	yes
XLOC_013915	XLOC_013915	Rpl35a	16:32914099-33127695	Control_PFC	Experimental_PFC	OK	84.1291	153.649	0.868965	2.22107	0.00035	0.00253699	yes
XLOC_013931	XLOC_013931	Adcy5	16:35154876-35305737	Control_PFC	Experimental_PFC	OK	30.135	59.8222	0.989241	3.88174	5e-05	0.000434753	yes
XLOC_013961	XLOC_013961	Polq	16:37011785-37095417	Control_PFC	Experimental_PFC	OK	2.72991	1.35195	-1.01381	-2.46833	0.0001	0.000825347	yes
XLOC_014049	XLOC_014049	Abi3bp	16:56477845-56690128	Control_PFC	Experimental_PFC	OK	9.72375	4.16625	-1.22276	-5.46357	5e-05	0.000434753	yes
XLOC_014052	XLOC_014052	Tomm70a	16:57121713-57154530	Control_PFC	Experimental_PFC	OK	47.2888	74.5868	0.657424	2.85813	5e-05	0.000434753	yes
XLOC_014055	XLOC_014055	Filip1l	16:57302198-57606825	Control_PFC	Experimental_PFC	OK	6.23714	1.04063	-2.58342	-5.00602	5e-05	0.000434753	yes
XLOC_014092	XLOC_014092	Gm26937	16:74961239-74962247	Control_PFC	Experimental_PFC	OK	10.2637	7.56161	-0.440781	-1.53751	0.008	0.0375716	yes
XLOC_014117	XLOC_014117	Cxadr	16:78301495-78359785	Control_PFC	Experimental_PFC	OK	6.17143	4.78386	-0.367431	-1.51403	0.0094	0.0429841	yes
XLOC_014127	XLOC_014127	Gm21833	16:82828381-82829881	Control_PFC	Experimental_PFC	OK	11.7456	6.85398	-0.777105	-3.08978	5e-05	0.000434753	yes
XLOC_014131	XLOC_014131	Jam2	16:84774122-84825928	Control_PFC	Experimental_PFC	OK	14.1879	7.76906	-0.868851	-2.75249	5e-05	0.000434753	yes
XLOC_014140	XLOC_014140	Bach1	16:87698944-87733346	Control_PFC	Experimental_PFC	OK	5.84637	4.20672	-0.474845	-1.62497	0.0036	0.0191544	yes
XLOC_014193	XLOC_014193	Cbr3	16:93683214-93690990	Control_PFC	Experimental_PFC	OK	7.26666	12.7108	0.806694	3.0191	5e-05	0.000434753	yes
XLOC_014204	XLOC_014204	Gm7976	16:95016369-95067017	Control_PFC	Experimental_PFC	OK	13.6785	5.70607	-1.26134	-4.63554	5e-05	0.000434753	yes
XLOC_014215	XLOC_014215	Igsf5,Pcp4	16:96361667-96525793	Control_PFC	Experimental_PFC	OK	234.141	311.576	0.412202	1.89887	0.00085	0.00553519	yes
XLOC_014218	XLOC_014218	Mx2	16:97535307-97560900	Control_PFC	Experimental_PFC	OK	1.47552	0.517136	-1.51261	-1.51995	0.0024	0.0135779	yes
XLOC_014227	XLOC_014227	Nlrc3	16:3945006-3976632	Control_PFC	Experimental_PFC	OK	1.70883	1.20773	-0.500709	-1.55915	0.005	0.0252887	yes
XLOC_014234	XLOC_014234	Adcy9	16:4287528-4420498	Control_PFC	Experimental_PFC	OK	21.7714	27.2368	0.323125	1.50694	0.0086	0.0399088	yes
XLOC_014238	XLOC_014238	Pam16	16:4594712-4624988	Control_PFC	Experimental_PFC	OK	22.9242	35.9543	0.649292	1.64917	0.00555	0.0276319	yes
XLOC_014317	XLOC_014317	Fgd4	16:16416916-16600549	Control_PFC	Experimental_PFC	OK	23.8525	16.5617	-0.526288	-2.21202	5e-05	0.000434753	yes
XLOC_014330	XLOC_014330	Sdf2l1	16:17130137-17132383	Control_PFC	Experimental_PFC	OK	10.393	15.4358	0.570667	2.2783	0.00015	0.00118995	yes
XLOC_014340	XLOC_014340	Slc7a4	16:17561884-17577800	Control_PFC	Experimental_PFC	OK	22.8167	34.3574	0.590533	1.94154	0.00085	0.00553519	yes
XLOC_014352	XLOC_014352	Tango2	16:18300824-18348103	Control_PFC	Experimental_PFC	OK	34.1331	46.6384	0.450348	1.73399	0.00285	0.015712	yes
XLOC_014386	XLOC_014386	Map6d1	16:20233309-20241358	Control_PFC	Experimental_PFC	OK	12.3397	15.3911	0.318797	1.48823	0.00915	0.042016	yes
XLOC_014397	XLOC_014397	Teddm3	16:21152654-21154000	Control_PFC	Experimental_PFC	OK	0.871506	2.26144	1.37566	2.7032	0.0001	0.000825347	yes
XLOC_014404	XLOC_014404	Tmem41a	16:21934326-21947552	Control_PFC	Experimental_PFC	OK	5.22402	7.30097	0.482928	1.67003	0.0042	0.0218178	yes
XLOC_014409	XLOC_014409	Dgkg	16:22468460-22657221	Control_PFC	Experimental_PFC	OK	17.2845	13.5708	-0.348972	-1.57058	0.00675	0.032566	yes
XLOC_014421	XLOC_014421	Sst	16:23889580-23890844	Control_PFC	Experimental_PFC	OK	113.498	179.702	0.662936	3.10791	5e-05	0.000434753	yes
XLOC_014427	XLOC_014427	P3h2	16:25956474-26105784	Control_PFC	Experimental_PFC	OK	2.1315	0.813478	-1.38969	-1.50992	0.0016	0.00958802	yes
XLOC_014437	XLOC_014437	Mb21d2	16:28826175-28929698	Control_PFC	Experimental_PFC	OK	9.96587	12.381	0.313058	1.48143	0.01	0.0452649	yes
XLOC_014449	XLOC_014449	Tmem44	16:30511854-30550842	Control_PFC	Experimental_PFC	OK	15.5505	21.4146	0.461633	1.88255	0.0009	0.00581278	yes
XLOC_014455	XLOC_014455	Apod	16:31296191-31314808	Control_PFC	Experimental_PFC	OK	88.6396	59.8274	-0.567143	-2.47377	5e-05	0.000434753	yes
XLOC_014456	XLOC_014456	1700007E05Rik	16:31376505-31379133	Control_PFC	Experimental_PFC	OK	1.06572	0.535023	-0.994162	-1.76242	0.0046	0.0235668	yes
XLOC_014460	XLOC_014460	Senp5	16:31962505-32003287	Control_PFC	Experimental_PFC	OK	16.3901	21.7139	0.405794	1.79679	0.00145	0.00880112	yes
XLOC_014487	XLOC_014487	Pdia5	16:35397312-35490873	Control_PFC	Experimental_PFC	OK	1.33656	2.11477	0.661972	1.67218	0.0049	0.0248537	yes
XLOC_014521	XLOC_014521	Ndufb4	16:37647169-37654453	Control_PFC	Experimental_PFC	OK	30.9886	50.1184	0.693605	2.83553	5e-05	0.000434753	yes
XLOC_014530	XLOC_014530	Arhgap31	16:38598339-38713274	Control_PFC	Experimental_PFC	OK	7.47827	5.1456	-0.539365	-2.19686	0.00015	0.00118995	yes
XLOC_014548	XLOC_014548	Gm25989	16:43861406-43964314	Control_PFC	Experimental_PFC	OK	475.753	2863.03	2.58926	4.21201	5e-05	0.000434753	yes
XLOC_014553	XLOC_014553	Boc	16:44485044-44558897	Control_PFC	Experimental_PFC	OK	5.76123	8.88482	0.624966	2.94794	5e-05	0.000434753	yes
XLOC_014563	XLOC_014563	Tagln3	16:45711229-45724608	Control_PFC	Experimental_PFC	OK	102.916	143.01	0.474656	2.19023	5e-05	0.000434753	yes
XLOC_014569	XLOC_014569	Gm4737	16:46152996-46155077	Control_PFC	Experimental_PFC	OK	2.53797	3.55276	0.485269	1.55196	0.0088	0.0406949	yes
XLOC_014599	XLOC_014599	Gm22422	16:56032608-56037819	Control_PFC	Experimental_PFC	OK	2965.89	7706.59	1.37763	5.49762	5e-05	0.000434753	yes
XLOC_014646	XLOC_014646	Arl6	16:59612948-59639391	Control_PFC	Experimental_PFC	OK	11.7257	15.5763	0.409677	1.73335	0.00245	0.0138233	yes
XLOC_014647	XLOC_014647	Epha6	16:59653482-60611236	Control_PFC	Experimental_PFC	OK	25.4916	18.9342	-0.429025	-1.65951	0.0047	0.0239971	yes
XLOC_014654	XLOC_014654	Epha3	16:63543537-63864158	Control_PFC	Experimental_PFC	OK	5.1514	3.08767	-0.738449	-3.33811	5e-05	0.000434753	yes
XLOC_014677	XLOC_014677	Samsn1	16:75858792-76022270	Control_PFC	Experimental_PFC	OK	1.16607	0.508542	-1.19721	-1.65253	0.00255	0.0143003	yes
XLOC_014699	XLOC_014699	Adamts5	16:85858169-85901125	Control_PFC	Experimental_PFC	OK	0.976374	0.335064	-1.543	-4.42834	5e-05	0.000434753	yes
XLOC_014738	XLOC_014738	Tiam1	16:89787110-89980080	Control_PFC	Experimental_PFC	OK	23.1828	14.3261	-0.694407	-1.84847	5e-05	0.000434753	yes
XLOC_014763	XLOC_014763	Rcan1	16:92391952-92466146	Control_PFC	Experimental_PFC	OK	20.7093	27.9406	0.432082	2.02285	0.00025	0.00188079	yes
XLOC_014770	XLOC_014770	Hlcs	16:94129194-94313563	Control_PFC	Experimental_PFC	OK	2.80562	3.61393	0.365246	1.53761	0.00785	0.0369682	yes
XLOC_014774	XLOC_014774	Kcnj6	16:94749265-94997696	Control_PFC	Experimental_PFC	OK	33.3472	45.0796	0.434909	1.97137	0.0008	0.00525136	yes
XLOC_014783	XLOC_014783	Lca5l	16:96158406-96192257	Control_PFC	Experimental_PFC	OK	1.08454	0.586249	-0.887497	-1.89695	0.00155	0.00932883	yes
XLOC_014805	XLOC_014805	Zdhhc14	17:5492599-5753891	Control_PFC	Experimental_PFC	OK	10.8189	15.3502	0.5047	2.36424	5e-05	0.000434753	yes
XLOC_014818	XLOC_014818	Dynlt1c	17:6601670-6609774	Control_PFC	Experimental_PFC	OK	10.4651	6.03976	-0.793024	-1.79224	0.0015	0.00906687	yes
XLOC_014835	XLOC_014835	Pde10a	17:8525371-8986648	Control_PFC	Experimental_PFC	OK	34.6128	88.5345	1.35493	3.18507	5e-05	0.000434753	yes
XLOC_014867	XLOC_014867	Mllt4	17:13482552-13906150	Control_PFC	Experimental_PFC	OK	46.6484	33.9781	-0.457225	-1.29112	0.0084	0.0391051	yes
XLOC_014873	XLOC_014873	Ermard	17:14978863-14991577	Control_PFC	Experimental_PFC	OK	6.86943	4.13936	-0.730783	-2.79577	5e-05	0.000434753	yes
XLOC_014874	XLOC_014874	Ermard	17:14995782-15041559	Control_PFC	Experimental_PFC	OK	0.989768	0.499055	-0.98789	-1.65026	0.0069	0.0331619	yes
XLOC_014881	XLOC_014881	Zfp960	17:17064112-17089628	Control_PFC	Experimental_PFC	OK	0.92418	0.52021	-0.829079	-1.771	0.0031	0.0168727	yes
XLOC_014885	XLOC_014885	Lix1	17:17402671-17459387	Control_PFC	Experimental_PFC	OK	20.2066	15.6413	-0.369463	-1.73894	0.00215	0.0123726	yes
XLOC_014890	XLOC_014890	Spaca6	17:17830718-17843009	Control_PFC	Experimental_PFC	OK	24.131	14.4436	-0.740454	-1.9752	0.0004	0.00285605	yes
XLOC_014928	XLOC_014928	Ppp2r1a	17:20945310-20965916	Control_PFC	Experimental_PFC	OK	149.953	197.373	0.39641	1.43135	0.0069	0.0331619	yes
XLOC_014989	XLOC_014989	Pgp	17:24470472-24471591	Control_PFC	Experimental_PFC	OK	21.6886	37.5744	0.792815	3.68489	5e-05	0.000434753	yes
XLOC_014998	XLOC_014998	Rps2	17:24718115-24721929	Control_PFC	Experimental_PFC	OK	216.494	1077.31	2.31503	2.02566	0.0008	0.00525136	yes
XLOC_015003	XLOC_015003	Hagh	17:24840142-24864450	Control_PFC	Experimental_PFC	OK	40.6143	60.9172	0.584863	2.44346	0.0001	0.000825347	yes
XLOC_015023	XLOC_015023	Gng13	17:25717170-25727419	Control_PFC	Experimental_PFC	OK	37.5526	80.6429	1.10264	3.55796	5e-05	0.000434753	yes
XLOC_015024	XLOC_015024	Rpusd1	17:25727750-25731456	Control_PFC	Experimental_PFC	OK	12.608	17.4129	0.465822	2.14649	0.00015	0.00118995	yes
XLOC_015038	XLOC_015038	Mrpl28	17:26123519-26126613	Control_PFC	Experimental_PFC	OK	31.0366	50.2163	0.694185	3.08713	5e-05	0.000434753	yes
XLOC_015070	XLOC_015070	Snrpc	17:27839973-27851968	Control_PFC	Experimental_PFC	OK	11.6906	16.2537	0.475418	1.65779	0.00515	0.0259278	yes
XLOC_015078	XLOC_015078	Rpl10a	17:28328470-28331032	Control_PFC	Experimental_PFC	OK	86.7121	141.089	0.702297	3.23241	5e-05	0.000434753	yes
XLOC_015095	XLOC_015095	Cdkn1a	17:29090978-29100722	Control_PFC	Experimental_PFC	OK	7.74377	4.85493	-0.673587	-2.40033	5e-05	0.000434753	yes
XLOC_015110	XLOC_015110	Glp1r	17:30901866-30936510	Control_PFC	Experimental_PFC	OK	1.90438	0.602209	-1.66098	-3.18064	5e-05	0.000434753	yes
XLOC_015152	XLOC_015152	Ndufa7	17:33824590-33838316	Control_PFC	Experimental_PFC	OK	87.9169	155.586	0.823502	3.89486	5e-05	0.000434753	yes
XLOC_015153	XLOC_015153	Cd320	17:33843090-33849774	Control_PFC	Experimental_PFC	OK	8.90486	14.0405	0.65693	1.82045	0.00285	0.015712	yes
XLOC_015157	XLOC_015157	Tapbp,Zbtb22	17:33915898-33929288	Control_PFC	Experimental_PFC	OK	12.9886	19.8999	0.615519	1.73746	0.00245	0.0138233	yes
XLOC_015187	XLOC_015187	Prrt1	17:34629532-34633126	Control_PFC	Experimental_PFC	OK	18.2374	14.2868	-0.352209	-1.63296	0.00445	0.0229075	yes
XLOC_015197	XLOC_015197	Neu1	17:34931252-34935953	Control_PFC	Experimental_PFC	OK	16.4434	21.9883	0.419229	1.65114	0.0063	0.0307574	yes
XLOC_015207	XLOC_015207	Ly6g6e	17:35071442-35078804	Control_PFC	Experimental_PFC	OK	4.23311	0.991462	-2.09409	-2.99889	5e-05	0.000434753	yes
XLOC_015243	XLOC_015243	Ier3	17:35821683-35822923	Control_PFC	Experimental_PFC	OK	5.48887	7.59495	0.468532	1.54273	0.00805	0.0377781	yes
XLOC_015284	XLOC_015284	Rnf39	17:36942917-36947986	Control_PFC	Experimental_PFC	OK	2.90896	4.80312	0.723471	2.00511	0.0005	0.00348019	yes
XLOC_015286	XLOC_015286	Zfp57	17:37001162-37010635	Control_PFC	Experimental_PFC	OK	3.72757	1.97688	-0.915012	-1.47129	0.001	0.00637663	yes
XLOC_015352	XLOC_015352	Tnfrsf21	17:43016554-43089188	Control_PFC	Experimental_PFC	OK	17.8987	22.266	0.314991	1.48604	0.0084	0.0391051	yes
XLOC_015359	XLOC_015359	Rcan2	17:43801850-44039516	Control_PFC	Experimental_PFC	OK	40.6812	55.9716	0.460335	1.76145	0.0029	0.015939	yes
XLOC_015369	XLOC_015369	Aars2	17:45506840-45520842	Control_PFC	Experimental_PFC	OK	6.51889	8.33597	0.354724	1.64527	0.00445	0.0229075	yes
XLOC_015383	XLOC_015383	Lrrc73	17:46254164-46257316	Control_PFC	Experimental_PFC	OK	13.6045	17.4747	0.361184	1.61058	0.0049	0.0248537	yes
XLOC_015388	XLOC_015388	Crip3	17:46428925-46431776	Control_PFC	Experimental_PFC	OK	1.81542	0.914694	-0.988938	-1.25457	0.00775	0.0365685	yes
XLOC_015396	XLOC_015396	Tbcc	17:46890620-46892463	Control_PFC	Experimental_PFC	OK	8.19666	11.2431	0.455925	1.96492	0.0006	0.00409089	yes
XLOC_015429	XLOC_015429	Plcl2	17:50509546-50688493	Control_PFC	Experimental_PFC	OK	40.9747	60.5078	0.562389	2.48454	5e-05	0.000434753	yes
XLOC_015457	XLOC_015457	Fsd1	17:55986510-55996881	Control_PFC	Experimental_PFC	OK	14.2751	19.5007	0.45002	2.1097	0.00025	0.00188079	yes
XLOC_015461	XLOC_015461	Tnfaip8l1	17:56162476-56173955	Control_PFC	Experimental_PFC	OK	2.18288	3.11949	0.515082	1.64883	0.0041	0.0213755	yes
XLOC_015467	XLOC_015467	Rpl36	17:56613394-56614243	Control_PFC	Experimental_PFC	OK	150.079	255.943	0.770103	3.60641	5e-05	0.000434753	yes
XLOC_015469	XLOC_015469	Ranbp3	17:56673224-56711769	Control_PFC	Experimental_PFC	OK	23.9521	30.972	0.370812	1.75265	0.0017	0.0100963	yes
XLOC_015470	XLOC_015470	Ndufa11	17:56717761-56724248	Control_PFC	Experimental_PFC	OK	13.1573	19.4264	0.562161	2.67885	5e-05	0.000434753	yes
XLOC_015475	XLOC_015475	Alkbh7	17:56997338-56999322	Control_PFC	Experimental_PFC	OK	4.46265	6.43368	0.527744	1.48377	0.01115	0.0496097	yes
XLOC_015483	XLOC_015483	Cntnap5c	17:57769569-58410342	Control_PFC	Experimental_PFC	OK	3.69014	2.82183	-0.387047	-1.53883	0.0076	0.0360012	yes
XLOC_015531	XLOC_015531	Yipf4	17:74489492-74500277	Control_PFC	Experimental_PFC	OK	12.3068	16.0267	0.381027	1.80341	0.00205	0.0118768	yes
XLOC_015533	XLOC_015533	Ttc27	17:74717749-74863570	Control_PFC	Experimental_PFC	OK	5.52018	7.10446	0.36401	1.57963	0.00605	0.0297195	yes
XLOC_015560	XLOC_015560	Tmem178	17:80944631-81001816	Control_PFC	Experimental_PFC	OK	35.3725	46.4954	0.39446	1.85733	0.0009	0.00581278	yes
XLOC_015573	XLOC_015573	Plekhh2	17:84511894-84622142	Control_PFC	Experimental_PFC	OK	2.75265	1.94591	-0.500376	-2.1319	0.00015	0.00118995	yes
XLOC_015583	XLOC_015583	Six3	17:85600650-85629302	Control_PFC	Experimental_PFC	OK	0.572171	2.27089	1.98874	1.95143	0.00015	0.00118995	yes
XLOC_015596	XLOC_015596	Socs5	17:87107678-87137583	Control_PFC	Experimental_PFC	OK	22.602	28.1095	0.314607	1.4685	0.0101	0.0456477	yes
XLOC_015629	XLOC_015629	Tmem242	17:5388762-5440259	Control_PFC	Experimental_PFC	OK	26.4934	34.7646	0.391989	1.7675	0.0023	0.0130957	yes
XLOC_015638	XLOC_015638	Tmem181c-ps	17:6612951-6632485	Control_PFC	Experimental_PFC	OK	2.03977	4.16862	1.03116	2.69827	5e-05	0.000434753	yes
XLOC_015649	XLOC_015649	Fndc1	17:7738568-7827302	Control_PFC	Experimental_PFC	OK	2.90077	1.42178	-1.02874	-1.35126	0.0108	0.0482642	yes
XLOC_015662	XLOC_015662	Qk	17:10206470-10319361	Control_PFC	Experimental_PFC	OK	75.3425	53.0849	-0.505163	-1.95473	0.00085	0.00553519	yes
XLOC_015669	XLOC_015669	Slc22a3	17:12419971-12507704	Control_PFC	Experimental_PFC	OK	0.457855	0.976539	1.09279	2.4887	5e-05	0.000434753	yes
XLOC_015678	XLOC_015678	Acat2	17:12942889-12960747	Control_PFC	Experimental_PFC	OK	10.0316	12.866	0.359004	1.63601	0.00465	0.0237897	yes
XLOC_015695	XLOC_015695	Dact2	17:14195230-14203831	Control_PFC	Experimental_PFC	OK	14.5583	22.2808	0.613963	2.88595	5e-05	0.000434753	yes
XLOC_015696	XLOC_015696	Thbs2	17:14665499-14694262	Control_PFC	Experimental_PFC	OK	2.58596	1.62932	-0.666426	-2.63956	5e-05	0.000434753	yes
XLOC_015703	XLOC_015703	Dll1	17:15367353-15379475	Control_PFC	Experimental_PFC	OK	4.273	1.83348	-1.22066	-1.68595	0.0016	0.00958802	yes
XLOC_015704	XLOC_015704	Psmb1	17:15475720-15498276	Control_PFC	Experimental_PFC	OK	60.4979	85.1138	0.492508	2.3206	0.00025	0.00188079	yes
XLOC_015747	XLOC_015747	Zfp942	17:21926959-21962464	Control_PFC	Experimental_PFC	OK	8.29518	6.17762	-0.425221	-1.77649	0.0017	0.0100963	yes
XLOC_015774	XLOC_015774	Tnfrsf12a	17:23675446-23677449	Control_PFC	Experimental_PFC	OK	3.50755	5.98134	0.770004	2.13316	0.0003	0.00221024	yes
XLOC_015777	XLOC_015777	Paqr4	17:23726335-23740330	Control_PFC	Experimental_PFC	OK	14.9888	21.2889	0.506223	2.35201	0.0001	0.000825347	yes
XLOC_015779	XLOC_015779	Flywch1	17:23755422-23771591	Control_PFC	Experimental_PFC	OK	64.2434	93.013	0.533884	2.39646	5e-05	0.000434753	yes
XLOC_015780	XLOC_015780	Flywch2	17:23771840-23786081	Control_PFC	Experimental_PFC	OK	8.57991	15.5292	0.855953	2.75704	5e-05	0.000434753	yes
XLOC_015799	XLOC_015799	Dnase1l2	17:24440080-24443105	Control_PFC	Experimental_PFC	OK	2.47715	1.31463	-0.914022	-1.79933	0.00105	0.00665123	yes
XLOC_015804	XLOC_015804	Slc9a3r2	17:24639281-24650305	Control_PFC	Experimental_PFC	OK	15.6611	11.5434	-0.440111	-2.02346	0.00045	0.00317388	yes
XLOC_015806	XLOC_015806	Syngr3	17:24685091-24689955	Control_PFC	Experimental_PFC	OK	47.4357	61.1077	0.365383	1.71566	0.0024	0.0135779	yes
XLOC_015811	XLOC_015811	Snora78	17:24718115-24721929	Control_PFC	Experimental_PFC	OK	1866.67	15844	3.0854	4.99591	5e-05	0.000434753	yes
XLOC_015814	XLOC_015814	Nubp2	17:24882610-24886350	Control_PFC	Experimental_PFC	OK	9.31842	14.324	0.620279	2.60242	5e-05	0.000434753	yes
XLOC_015821	XLOC_015821	Baiap3	17:25240169-25256364	Control_PFC	Experimental_PFC	OK	3.82718	1.42396	-1.42637	-2.01475	0.0003	0.00221024	yes
XLOC_015827	XLOC_015827	Sstr5	17:25489874-25497288	Control_PFC	Experimental_PFC	OK	0.381031	1.28488	1.75365	3.48458	5e-05	0.000434753	yes
XLOC_015834	XLOC_015834	Fam173a	17:25786579-25792284	Control_PFC	Experimental_PFC	OK	26.3332	36.1496	0.457099	2.04175	0.0004	0.00285605	yes
XLOC_015848	XLOC_015848	Arhgdig,Pdia2	17:26195998-26211324	Control_PFC	Experimental_PFC	OK	39.5419	57.0692	0.529329	2.01159	0.00065	0.00438462	yes
XLOC_015857	XLOC_015857	Cuta	17:26937972-26939478	Control_PFC	Experimental_PFC	OK	26.489	38.6297	0.544317	2.2803	5e-05	0.000434753	yes
XLOC_015861	XLOC_015861	Uqcc2	17:27122662-27133916	Control_PFC	Experimental_PFC	OK	101.981	218.912	1.10205	5.19893	5e-05	0.000434753	yes
XLOC_015866	XLOC_015866	AI413582	17:27556619-27565749	Control_PFC	Experimental_PFC	OK	17.869	27.4941	0.621661	2.16571	0.00015	0.00118995	yes
XLOC_015868	XLOC_015868	Rps10	17:27630421-27636862	Control_PFC	Experimental_PFC	OK	127.371	189.451	0.572784	2.67844	5e-05	0.000434753	yes
XLOC_015892	XLOC_015892	Cpne5	17:29156549-29237797	Control_PFC	Experimental_PFC	OK	35.4983	49.4789	0.479063	1.49932	0.00605	0.0297195	yes
XLOC_015900	XLOC_015900	Mdga1	17:29827955-29970087	Control_PFC	Experimental_PFC	OK	9.26729	4.93843	-0.908093	-1.83834	0.00145	0.00880112	yes
XLOC_015922	XLOC_015922	Akap8	17:32303675-32321153	Control_PFC	Experimental_PFC	OK	16.6893	11.7878	-0.501634	-2.35366	0.0001	0.000825347	yes
XLOC_015923	XLOC_015923	Akap8l	17:32321424-32350581	Control_PFC	Experimental_PFC	OK	37.119	29.3448	-0.339052	-1.59949	0.0061	0.0299196	yes
XLOC_015944	XLOC_015944	Zfp101	17:33360506-33394641	Control_PFC	Experimental_PFC	OK	7.9348	10.54	0.409606	1.41674	0.0108	0.0482642	yes
XLOC_015988	XLOC_015988	C4b	17:34728379-34743882	Control_PFC	Experimental_PFC	OK	7.65131	3.72809	-1.03727	-2.97053	5e-05	0.000434753	yes
XLOC_015993	XLOC_015993	C4a	17:34809091-34823464	Control_PFC	Experimental_PFC	OK	1.85382	0.874646	-1.08373	-1.14621	0.0084	0.0391051	yes
XLOC_016025	XLOC_016025	Tcf19	17:35512733-35516824	Control_PFC	Experimental_PFC	OK	1.67111	2.50322	0.582983	1.39809	0.01025	0.046202	yes
XLOC_016030	XLOC_016030	Gtf2h4	17:35667729-35673739	Control_PFC	Experimental_PFC	OK	5.01163	7.8735	0.651726	1.74674	0.0005	0.00348019	yes
XLOC_016055	XLOC_016055	Gm10499	17:36141757-36163176	Control_PFC	Experimental_PFC	OK	1.74462	2.80865	0.686965	1.73564	0.00215	0.0123726	yes
XLOC_016071	XLOC_016071	Trim39	17:36258872-36272247	Control_PFC	Experimental_PFC	OK	9.59718	7.06311	-0.442306	-2.0138	0.00055	0.00378661	yes
XLOC_016152	XLOC_016152	Adgrf4	17:42656890-42692284	Control_PFC	Experimental_PFC	OK	0.885314	0.334083	-1.40598	-1.49727	0.00085	0.00553519	yes
XLOC_016154	XLOC_016154	Cd2ap	17:42792950-42876424	Control_PFC	Experimental_PFC	OK	5.63173	3.90203	-0.529353	-2.45966	5e-05	0.000434753	yes
XLOC_016226	XLOC_016226	Rftn1	17:49992256-50190674	Control_PFC	Experimental_PFC	OK	4.98206	3.44658	-0.531575	-1.70835	0.0035	0.0187064	yes
XLOC_016230	XLOC_016230	Satb1	17:51736186-51834723	Control_PFC	Experimental_PFC	OK	23.3685	31.2917	0.421219	1.53337	0.0038	0.0200491	yes
XLOC_016248	XLOC_016248	Slc5a7	17:54273593-54299034	Control_PFC	Experimental_PFC	OK	0.661572	1.45211	1.13418	3.14116	5e-05	0.000434753	yes
XLOC_016251	XLOC_016251	Pot1b	17:55652024-55712628	Control_PFC	Experimental_PFC	OK	1.47068	1.02282	-0.523927	-1.51192	0.0095	0.0433594	yes
XLOC_016262	XLOC_016262	Plin5	17:56111600-56117596	Control_PFC	Experimental_PFC	OK	0.677305	0.246902	-1.45587	-2.11099	0.00135	0.00827436	yes
XLOC_016264	XLOC_016264	Sema6b	17:56123084-56140343	Control_PFC	Experimental_PFC	OK	22.0749	28.4246	0.364733	1.72618	0.00255	0.0143003	yes
XLOC_016266	XLOC_016266	Mydgf	17:56175743-56183920	Control_PFC	Experimental_PFC	OK	13.7085	20.2362	0.561862	2.30386	5e-05	0.000434753	yes
XLOC_016274	XLOC_016274	Safb2	17:56560964-56584585	Control_PFC	Experimental_PFC	OK	29.7367	17.6472	-0.752806	-2.02506	0.0006	0.00409089	yes
XLOC_016275	XLOC_016275	2410015M20Rik	17:56607451-56609771	Control_PFC	Experimental_PFC	OK	29.9812	45.9833	0.617055	2.82626	5e-05	0.000434753	yes
XLOC_016278	XLOC_016278	Nrtn	17:56751324-56757530	Control_PFC	Experimental_PFC	OK	0.289974	1.10293	1.92735	2.13135	0.0017	0.0100963	yes
XLOC_016289	XLOC_016289	Tubb4a	17:57080065-57087782	Control_PFC	Experimental_PFC	OK	121.145	161.763	0.417145	1.74703	0.00255	0.0143003	yes
XLOC_016319	XLOC_016319	Vapa	17:65580055-65613555	Control_PFC	Experimental_PFC	OK	51.0587	63.4051	0.312442	1.47713	0.00955	0.0435409	yes
XLOC_016325	XLOC_016325	Ndufv2	17:66078794-66101559	Control_PFC	Experimental_PFC	OK	60.424	78.3739	0.37525	1.69145	0.0025	0.0140585	yes
XLOC_016330	XLOC_016330	Ptprm	17:66666847-67354459	Control_PFC	Experimental_PFC	OK	14.3689	9.56441	-0.587205	-2.74054	5e-05	0.000434753	yes
XLOC_016360	XLOC_016360	Galnt14	17:73493227-73710453	Control_PFC	Experimental_PFC	OK	5.88052	7.96776	0.438231	1.85617	0.00155	0.00932883	yes
XLOC_016373	XLOC_016373	Fez2	17:78377884-78418131	Control_PFC	Experimental_PFC	OK	11.3789	14.6701	0.366517	1.7052	0.00255	0.0143003	yes
XLOC_016375	XLOC_016375	Strn	17:78649912-78737196	Control_PFC	Experimental_PFC	OK	21.8051	33.7846	0.631705	2.03939	0.0007	0.00467802	yes
XLOC_016381	XLOC_016381	Prkd3	17:78949404-79020816	Control_PFC	Experimental_PFC	OK	4.79234	3.64741	-0.393858	-1.55763	0.00515	0.0259278	yes
XLOC_016382	XLOC_016382	Cdc42ep3	17:79334024-79358022	Control_PFC	Experimental_PFC	OK	7.09957	9.60946	0.436724	1.80132	0.0014	0.00853755	yes
XLOC_016383	XLOC_016383	Cyp1b1	17:79706952-79715041	Control_PFC	Experimental_PFC	OK	0.834078	0.361264	-1.20713	-2.97269	5e-05	0.000434753	yes
XLOC_016392	XLOC_016392	Cdkl4	17:80523549-80563834	Control_PFC	Experimental_PFC	OK	3.508	4.59801	0.390361	1.52367	0.00795	0.0373681	yes
XLOC_016410	XLOC_016410	Prepl	17:85028346-85090267	Control_PFC	Experimental_PFC	OK	84.7818	114.972	0.43946	1.81076	0.0012	0.00747245	yes
XLOC_016413	XLOC_016413	Six2	17:85684276-85688274	Control_PFC	Experimental_PFC	OK	1.67957	0.980761	-0.776122	-1.79861	0.0029	0.015939	yes
XLOC_016451	XLOC_016451	G430049J08Rik	18:3471629-3474315	Control_PFC	Experimental_PFC	OK	1.0457	0.539677	-0.954297	-2.09805	0.00085	0.00553519	yes
XLOC_016452	XLOC_016452	Bambi	18:3507956-3516404	Control_PFC	Experimental_PFC	OK	1.02189	0.358933	-1.50945	-3.72028	5e-05	0.000434753	yes
XLOC_016456	XLOC_016456	9430020K01Rik	18:4634928-4682868	Control_PFC	Experimental_PFC	OK	27.1719	35.1214	0.370233	1.63515	0.005	0.0252887	yes
XLOC_016458	XLOC_016458	Svil	18:4920539-5119299	Control_PFC	Experimental_PFC	OK	4.38735	2.52584	-0.796589	-1.62103	0.0017	0.0100963	yes
XLOC_016474	XLOC_016474	Colec12	18:9707647-9877995	Control_PFC	Experimental_PFC	OK	4.40858	3.27394	-0.429283	-1.69636	0.00365	0.0193807	yes
XLOC_016492	XLOC_016492	Lama3	18:12333818-12583013	Control_PFC	Experimental_PFC	OK	2.78597	1.0604	-1.39357	-5.63997	5e-05	0.000434753	yes
XLOC_016494	XLOC_016494	Ttc39c	18:12599925-12737050	Control_PFC	Experimental_PFC	OK	13.5213	7.0865	-0.932088	-3.30024	5e-05	0.000434753	yes
XLOC_016523	XLOC_016523	Ttr	18:20558073-20674324	Control_PFC	Experimental_PFC	OK	13.0413	3.93473	-1.72876	-5.12024	5e-05	0.000434753	yes
XLOC_016528	XLOC_016528	4930426D05Rik	18:21550376-21656105	Control_PFC	Experimental_PFC	OK	0.747639	0.103862	-2.84767	-1.26832	0.00245	0.0138233	yes
XLOC_016529	XLOC_016529	Asxl3	18:22344882-22530227	Control_PFC	Experimental_PFC	OK	3.01395	2.33306	-0.369433	-1.60164	0.0053	0.0265686	yes
XLOC_016551	XLOC_016551	B930094E09Rik	18:31580167-31610751	Control_PFC	Experimental_PFC	OK	4.56746	11.6856	1.35526	1.87935	0.0037	0.019607	yes
XLOC_016557	XLOC_016557	Gm16344	18:31959233-32036961	Control_PFC	Experimental_PFC	OK	24.9235	19.1178	-0.382589	-1.8019	0.00195	0.0113736	yes
XLOC_016568	XLOC_016568	Camk4	18:32915825-33195767	Control_PFC	Experimental_PFC	OK	27.3971	37.7454	0.462276	1.79408	0.00185	0.0108623	yes
XLOC_016571	XLOC_016571	Gm23639	18:33794891-33795986	Control_PFC	Experimental_PFC	OK	258.059	677.405	1.39232	2.81939	5e-05	0.000434753	yes
XLOC_016573	XLOC_016573	Apc	18:34207774-34322189	Control_PFC	Experimental_PFC	OK	114.034	72.2845	-0.657711	-1.05897	0.00375	0.0198305	yes
XLOC_016588	XLOC_016588	Gm28285,Matr3	18:35553370-35593835	Control_PFC	Experimental_PFC	OK	3187.83	8161.73	1.3563	2.59626	5e-05	0.000434753	yes
XLOC_016593	XLOC_016593	Ube2d2a	18:35771558-35807172	Control_PFC	Experimental_PFC	OK	33.5279	41.5468	0.309377	1.46449	0.0112	0.0497926	yes
XLOC_016608	XLOC_016608	Vaultrc5	18:36801865-36802008	Control_PFC	Experimental_PFC	OK	463.169	1715.82	1.88929	6.93015	5e-05	0.000434753	yes
XLOC_016640	XLOC_016640	Rell2	18:37955078-37969774	Control_PFC	Experimental_PFC	OK	29.9729	45.5395	0.603462	1.82113	0.0013	0.0080057	yes
XLOC_016644	XLOC_016644	Rnf14	18:38296634-38317847	Control_PFC	Experimental_PFC	OK	74.1984	100.173	0.433035	1.85331	0.0008	0.00525136	yes
XLOC_016647	XLOC_016647	Ndfip1	18:38418974-38464399	Control_PFC	Experimental_PFC	OK	186.911	284.879	0.607998	2.73014	5e-05	0.000434753	yes
XLOC_016650	XLOC_016650	Arhgap26	18:38601533-39389425	Control_PFC	Experimental_PFC	OK	30.475	44.294	0.539486	1.39567	0.0046	0.0235668	yes
XLOC_016654	XLOC_016654	Kctd16	18:40258360-40531168	Control_PFC	Experimental_PFC	OK	28.5125	39.7207	0.478295	2.24534	0.0001	0.000825347	yes
XLOC_016657	XLOC_016657	Sh3rf2	18:42053666-42158960	Control_PFC	Experimental_PFC	OK	1.03225	4.35682	2.07748	4.84658	5e-05	0.000434753	yes
XLOC_016666	XLOC_016666	Stk32a	18:43207696-43317481	Control_PFC	Experimental_PFC	OK	1.07799	2.59826	1.2692	4.00563	5e-05	0.000434753	yes
XLOC_016699	XLOC_016699	Tnfaip8	18:49979426-50107173	Control_PFC	Experimental_PFC	OK	6.31034	3.57734	-0.81883	-2.01537	0.00015	0.00118995	yes
XLOC_016716	XLOC_016716	Gm26742	18:54888044-54990180	Control_PFC	Experimental_PFC	OK	3.41903	1.10265	-1.63261	-2.58063	5e-05	0.000434753	yes
XLOC_016730	XLOC_016730	Megf10	18:57133089-57297467	Control_PFC	Experimental_PFC	OK	5.3544	4.2439	-0.335334	-1.45761	0.0111	0.0494223	yes
XLOC_016738	XLOC_016738	Isoc1	18:58659481-58679570	Control_PFC	Experimental_PFC	OK	9.2706	5.40831	-0.777487	-3.33339	5e-05	0.000434753	yes
XLOC_016739	XLOC_016739	Adamts19	18:58836763-59053678	Control_PFC	Experimental_PFC	OK	1.14718	0.016782	-6.09503	-3.40841	0.01045	0.0469485	yes
XLOC_016752	XLOC_016752	Rps14	18:60774509-60778546	Control_PFC	Experimental_PFC	OK	192.839	308.391	0.677366	3.09307	5e-05	0.000434753	yes
XLOC_016758	XLOC_016758	Pdgfrb	18:61045149-61085061	Control_PFC	Experimental_PFC	OK	5.34599	4.24715	-0.331962	-1.55142	0.00825	0.0385281	yes
XLOC_016780	XLOC_016780	St8sia3	18:64157720-64277180	Control_PFC	Experimental_PFC	OK	20.5482	28.1172	0.452441	1.84672	0.00085	0.00553519	yes
XLOC_016781	XLOC_016781	Onecut2	18:64340363-64398488	Control_PFC	Experimental_PFC	OK	0.849573	1.41201	0.732938	2.99405	5e-05	0.000434753	yes
XLOC_016787	XLOC_016787	Zfp532	18:65580229-65689443	Control_PFC	Experimental_PFC	OK	58.38	99.0105	0.762107	2.20009	0.0001	0.000825347	yes
XLOC_016796	XLOC_016796	Gnal	18:67088335-67245830	Control_PFC	Experimental_PFC	OK	33.6792	50.8093	0.593235	2.4118	5e-05	0.000434753	yes
XLOC_016799	XLOC_016799	Tubb6	18:67390716-67402748	Control_PFC	Experimental_PFC	OK	3.54955	1.62365	-1.1284	-3.11463	5e-05	0.000434753	yes
XLOC_016829	XLOC_016829	Rpl17	18:75000476-75003381	Control_PFC	Experimental_PFC	OK	212.349	268.772	0.339946	1.55752	0.0065	0.0315788	yes
XLOC_016856	XLOC_016856	Gm16286,Txnl4a	18:80206764-80223533	Control_PFC	Experimental_PFC	OK	37.4598	47.4141	0.339974	1.52449	0.0074	0.0351869	yes
XLOC_016857	XLOC_016857	Pqlc1	18:80253291-80292725	Control_PFC	Experimental_PFC	OK	7.89561	10.611	0.426436	1.73849	0.0017	0.0100963	yes
XLOC_016869	XLOC_016869	Zadh2	18:84088157-84097514	Control_PFC	Experimental_PFC	OK	7.18966	4.21308	-0.77105	-3.33168	5e-05	0.000434753	yes
XLOC_016872	XLOC_016872	Cyb5a	18:84851337-84880401	Control_PFC	Experimental_PFC	OK	54.1782	71.3206	0.396607	1.73056	0.0017	0.0100963	yes
XLOC_016894	XLOC_016894	Zfp438	18:5210030-5334439	Control_PFC	Experimental_PFC	OK	2.29606	1.57253	-0.54608	-1.74585	0.00305	0.0166423	yes
XLOC_016904	XLOC_016904	Mpp7	18:7347961-7626863	Control_PFC	Experimental_PFC	OK	1.76537	2.98403	0.75729	2.90345	5e-05	0.000434753	yes
XLOC_016913	XLOC_016913	Rock1	18:10064400-10181792	Control_PFC	Experimental_PFC	OK	8.461	6.23811	-0.43972	-2.03728	0.00025	0.00188079	yes
XLOC_016940	XLOC_016940	Aqp4	18:15389393-15403684	Control_PFC	Experimental_PFC	OK	19.8458	11.5996	-0.774753	-3.63609	5e-05	0.000434753	yes
XLOC_016958	XLOC_016958	Klhl14	18:21550376-21656105	Control_PFC	Experimental_PFC	OK	0.833491	0.136881	-2.60624	-3.81838	5e-05	0.000434753	yes
XLOC_016969	XLOC_016969	Slc39a6	18:24579880-24603817	Control_PFC	Experimental_PFC	OK	11.1645	7.8424	-0.509552	-2.03263	0.00085	0.00553519	yes
XLOC_016988	XLOC_016988	Gpr17	18:31931506-31958619	Control_PFC	Experimental_PFC	OK	8.58956	6.68496	-0.361666	-1.59779	0.0058	0.028702	yes
XLOC_017000	XLOC_017000	Epb4.1l4a	18:33796326-34007206	Control_PFC	Experimental_PFC	OK	1.61961	0.484885	-1.73993	-4.44229	5e-05	0.000434753	yes
XLOC_017004	XLOC_017004	Reep5	18:34344888-34373415	Control_PFC	Experimental_PFC	OK	63.3489	84.2217	0.410873	1.82618	0.0015	0.00906687	yes
XLOC_017018	XLOC_017018	Sil1	18:35266399-35498925	Control_PFC	Experimental_PFC	OK	8.89902	12.4173	0.480638	2.0671	0.0003	0.00221024	yes
XLOC_017029	XLOC_017029	Hbegf	18:36504928-36515805	Control_PFC	Experimental_PFC	OK	3.59481	5.21417	0.536521	2.00912	0.00045	0.00317388	yes
XLOC_017033	XLOC_017033	Ndufa2	18:36735067-36744557	Control_PFC	Experimental_PFC	OK	74.701	117.851	0.657763	2.85868	5e-05	0.000434753	yes
XLOC_017070	XLOC_017070	Nr3c1	18:39410544-39491301	Control_PFC	Experimental_PFC	OK	26.1266	35.9245	0.459449	1.72476	0.0016	0.00958802	yes
XLOC_017081	XLOC_017081	Dpysl3	18:43320978-43438286	Control_PFC	Experimental_PFC	OK	12.1305	7.62685	-0.669477	-2.03179	0.00015	0.00118995	yes
XLOC_017105	XLOC_017105	Sema6a	18:47235597-47368870	Control_PFC	Experimental_PFC	OK	9.36186	5.39162	-0.796076	-2.07871	0.00015	0.00118995	yes
XLOC_017120	XLOC_017120	Zfp608	18:54888044-54990180	Control_PFC	Experimental_PFC	OK	10.7643	4.47731	-1.26555	-5.46834	5e-05	0.000434753	yes
XLOC_017131	XLOC_017131	1700066O22Rik,4930511M06Rik	18:57354732-57731065	Control_PFC	Experimental_PFC	OK	1.13704	0.480617	-1.24232	-0.866986	0.00405	0.0211667	yes
XLOC_017133	XLOC_017133	Fbn2	18:58008622-58209926	Control_PFC	Experimental_PFC	OK	2.1587	1.2955	-0.73665	-3.18312	5e-05	0.000434753	yes
XLOC_017138	XLOC_017138	Smim3	18:60474192-60501983	Control_PFC	Experimental_PFC	OK	1.98414	2.95293	0.573633	1.69477	0.0039	0.0204924	yes
XLOC_017149	XLOC_017149	Rps2-ps10	18:61220481-61289924	Control_PFC	Experimental_PFC	OK	42.6113	93.7378	1.13739	5.35216	5e-05	0.000434753	yes
XLOC_017161	XLOC_017161	Ablim3	18:61799394-61911852	Control_PFC	Experimental_PFC	OK	14.3693	4.31375	-1.73597	-7.61839	5e-05	0.000434753	yes
XLOC_017169	XLOC_017169	Txnl1	18:63662800-63692359	Control_PFC	Experimental_PFC	OK	17.1821	21.6492	0.333405	1.56325	0.00715	0.0341752	yes
XLOC_017207	XLOC_017207	n-R5-8s1	18:73533402-73533550	Control_PFC	Experimental_PFC	OK	9.49312	0	#NAME?	#NAME?	0.00135	0.00827436	yes
XLOC_017234	XLOC_017234	Slc14a1	18:78100090-78142119	Control_PFC	Experimental_PFC	OK	2.7631	1.81925	-0.602944	-1.90156	0.0013	0.0080057	yes
XLOC_017236	XLOC_017236	Setbp1	18:78750379-79109391	Control_PFC	Experimental_PFC	OK	14.5285	11.4638	-0.341806	-1.47841	0.00955	0.0435409	yes
XLOC_017246	XLOC_017246	Nfatc1	18:80606204-80713071	Control_PFC	Experimental_PFC	OK	2.1012	0.746715	-1.49258	-4.5658	5e-05	0.000434753	yes
XLOC_017249	XLOC_017249	Sall3	18:80966375-80988575	Control_PFC	Experimental_PFC	OK	3.34637	0.769172	-2.12122	-7.574	5e-05	0.000434753	yes
XLOC_017260	XLOC_017260	Tshz1	18:84011626-84086404	Control_PFC	Experimental_PFC	OK	21.1346	7.69074	-1.45842	-6.45114	5e-05	0.000434753	yes
XLOC_017273	XLOC_017273	9330132A10Rik	18:89293501-89297229	Control_PFC	Experimental_PFC	OK	17.2347	11.9678	-0.526155	-2.47462	0.0001	0.000825347	yes
XLOC_017291	XLOC_017291	Doc2g,Nudt8	19:4000579-4007005	Control_PFC	Experimental_PFC	OK	41.8304	7.07265	-2.56423	-8.15124	5e-05	0.000434753	yes
XLOC_017300	XLOC_017300	Ppp1ca	19:4192157-4201603	Control_PFC	Experimental_PFC	OK	91.4973	154.055	0.751648	3.21828	5e-05	0.000434753	yes
XLOC_017314	XLOC_017314	B4gat1	19:5038825-5041134	Control_PFC	Experimental_PFC	OK	32.5152	51.009	0.649639	3.06206	5e-05	0.000434753	yes
XLOC_017323	XLOC_017323	AI837181	19:5425156-5427313	Control_PFC	Experimental_PFC	OK	18.7763	23.9707	0.35236	1.68385	0.00345	0.0184791	yes
XLOC_017343	XLOC_017343	Fau	19:6057887-6059524	Control_PFC	Experimental_PFC	OK	179.019	240.084	0.423422	1.96172	0.00055	0.00378661	yes
XLOC_017344	XLOC_017344	Znhit2	19:6061191-6062472	Control_PFC	Experimental_PFC	OK	10.0276	17.6446	0.815252	3.4189	5e-05	0.000434753	yes
XLOC_017356	XLOC_017356	Ehd1	19:6276724-6300096	Control_PFC	Experimental_PFC	OK	7.55159	10.5689	0.484973	1.70803	0.0021	0.0121275	yes
XLOC_017363	XLOC_017363	Rasgrp2	19:6399339-6418606	Control_PFC	Experimental_PFC	OK	17.6528	32.377	0.875071	2.35652	5e-05	0.000434753	yes
XLOC_017383	XLOC_017383	Slc22a8	19:8591253-8611834	Control_PFC	Experimental_PFC	OK	3.46135	2.03237	-0.768173	-2.80308	5e-05	0.000434753	yes
XLOC_017384	XLOC_017384	Slc22a6	19:8617995-8628299	Control_PFC	Experimental_PFC	OK	1.48937	0.91027	-0.710336	-2.10297	0.00015	0.00118995	yes
XLOC_017393	XLOC_017393	Snord22	19:8725865-8725991	Control_PFC	Experimental_PFC	OK	10470.3	14490.7	0.468825	2.18963	0.0002	0.00154481	yes
XLOC_017394	XLOC_017394	Wdr74	19:8735838-8740623	Control_PFC	Experimental_PFC	OK	12.3078	17.6272	0.518237	2.20872	0.00015	0.00118995	yes
XLOC_017405	XLOC_017405	B3gat3	19:8920373-8927234	Control_PFC	Experimental_PFC	OK	48.2141	76.2876	0.661993	3.113	5e-05	0.000434753	yes
XLOC_017410	XLOC_017410	Ahnak	19:8989283-9076919	Control_PFC	Experimental_PFC	OK	8.89385	6.76735	-0.394218	-1.67039	0.00145	0.00880112	yes
XLOC_017433	XLOC_017433	Prpf19	19:10895230-10909559	Control_PFC	Experimental_PFC	OK	51.6329	65.9753	0.353635	1.51837	0.00665	0.0321725	yes
XLOC_017509	XLOC_017509	Prune2	19:16956117-17223932	Control_PFC	Experimental_PFC	OK	4.91455	3.417	-0.524328	-2.44723	5e-05	0.000434753	yes
XLOC_017516	XLOC_017516	Gm23238	19:18732740-18732904	Control_PFC	Experimental_PFC	OK	65.5132	284.068	2.11638	5.36712	5e-05	0.000434753	yes
XLOC_017526	XLOC_017526	Trpm3	19:22139118-22989884	Control_PFC	Experimental_PFC	OK	14.0386	9.73368	-0.528344	-2.04475	0.00035	0.00253699	yes
XLOC_017529	XLOC_017529	Klf9	19:23141225-23166911	Control_PFC	Experimental_PFC	OK	41.6744	53.4456	0.358909	1.64742	0.00455	0.0233511	yes
XLOC_017537	XLOC_017537	Gm9938	19:23723278-23725034	Control_PFC	Experimental_PFC	OK	8.7924	6.44156	-0.448846	-1.79319	0.00185	0.0108623	yes
XLOC_017542	XLOC_017542	Tmem252	19:24674007-24679661	Control_PFC	Experimental_PFC	OK	0.628763	0.312455	-1.00887	-1.76067	0.0049	0.0248537	yes
XLOC_017545	XLOC_017545	Kank1	19:25236974-25434496	Control_PFC	Experimental_PFC	OK	5.47271	3.57739	-0.613346	-1.99961	0.0014	0.00853755	yes
XLOC_017580	XLOC_017580	Minpp1	19:32485768-32515370	Control_PFC	Experimental_PFC	OK	15.8924	21.4249	0.430958	2.01695	0.0006	0.00409089	yes
XLOC_017596	XLOC_017596	Ifit3	19:34583530-34588731	Control_PFC	Experimental_PFC	OK	1.5096	0.880179	-0.778293	-1.70512	0.0049	0.0248537	yes
XLOC_017597	XLOC_017597	Ifit3b	19:34607969-34613401	Control_PFC	Experimental_PFC	OK	1.97408	1.05707	-0.90111	-2.23805	0.0004	0.00285605	yes
XLOC_017598	XLOC_017598	Ifit1	19:34640870-34650009	Control_PFC	Experimental_PFC	OK	0.797345	0.427125	-0.900545	-1.7905	0.00355	0.0189337	yes
XLOC_017624	XLOC_017624	Plce1	19:38481108-38785030	Control_PFC	Experimental_PFC	OK	3.77148	1.9648	-0.940746	-2.08145	0.00025	0.00188079	yes
XLOC_017650	XLOC_017650	Frat1	19:41830167-41830809	Control_PFC	Experimental_PFC	OK	0.709866	2.26682	1.67505	2.14427	0.0031	0.0168727	yes
XLOC_017657	XLOC_017657	Pi4k2a	19:42090434-42122218	Control_PFC	Experimental_PFC	OK	14.8891	18.7819	0.335085	1.58191	0.0058	0.028702	yes
XLOC_017658	XLOC_017658	Marveld1	19:42147399-42151703	Control_PFC	Experimental_PFC	OK	3.21966	2.04921	-0.651837	-2.28367	5e-05	0.000434753	yes
XLOC_017681	XLOC_017681	Sema4g	19:44989100-45003397	Control_PFC	Experimental_PFC	OK	4.02816	2.88197	-0.483068	-1.99616	0.00065	0.00438462	yes
XLOC_017685	XLOC_017685	Kazald1	19:45075240-45079289	Control_PFC	Experimental_PFC	OK	1.68475	2.87266	0.769848	1.94329	0.0009	0.00581278	yes
XLOC_017698	XLOC_017698	Fbxl15	19:46328183-46338660	Control_PFC	Experimental_PFC	OK	5.42613	11.1071	1.03348	1.7473	0.0034	0.0182591	yes
XLOC_017732	XLOC_017732	Dusp5	19:53529108-53542431	Control_PFC	Experimental_PFC	OK	5.85318	4.08833	-0.517711	-2.02338	0.00055	0.00378661	yes
XLOC_017733	XLOC_017733	Smc3	19:53600397-53645833	Control_PFC	Experimental_PFC	OK	18.0851	12.3902	-0.545605	-1.86512	0.00045	0.00317388	yes
XLOC_017734	XLOC_017734	Rbm20	19:53677305-53867080	Control_PFC	Experimental_PFC	OK	1.93759	1.03746	-0.901202	-1.94954	0.0001	0.000825347	yes
XLOC_017737	XLOC_017737	Adra2a	19:54045181-54048982	Control_PFC	Experimental_PFC	OK	2.46443	1.68415	-0.549239	-1.89541	0.0015	0.00906687	yes
XLOC_017741	XLOC_017741	Tcf7l2	19:55741809-55933654	Control_PFC	Experimental_PFC	OK	1.41905	0.695061	-1.02971	-1.02831	0.0011	0.00692755	yes
XLOC_017748	XLOC_017748	Adrb1	19:56722371-56724862	Control_PFC	Experimental_PFC	OK	9.03991	11.5177	0.34947	1.61667	0.00545	0.0272053	yes
XLOC_017781	XLOC_017781	Gal	19:3409918-3414472	Control_PFC	Experimental_PFC	OK	1.42037	0.130577	-3.44329	-1.87136	0.007	0.0335834	yes
XLOC_017783	XLOC_017783	Lrp5	19:3584827-3686564	Control_PFC	Experimental_PFC	OK	2.6589	2.0172	-0.398478	-1.50957	0.0083	0.0387242	yes
XLOC_017786	XLOC_017786	Ndufs8	19:3908869-3912717	Control_PFC	Experimental_PFC	OK	37.0597	62.2812	0.748944	3.54642	5e-05	0.000434753	yes
XLOC_017789	XLOC_017789	Ndufv1	19:4007496-4012806	Control_PFC	Experimental_PFC	OK	73.9543	101.505	0.456842	2.02288	0.0006	0.00409089	yes
XLOC_017790	XLOC_017790	Gstp1	19:4035406-4037921	Control_PFC	Experimental_PFC	OK	50.8177	72.9673	0.52192	2.47527	5e-05	0.000434753	yes
XLOC_017794	XLOC_017794	Aip	19:4114445-4125858	Control_PFC	Experimental_PFC	OK	31.3028	42.229	0.431944	1.87518	0.0011	0.00692755	yes
XLOC_017810	XLOC_017810	Rce1	19:4622550-4625617	Control_PFC	Experimental_PFC	OK	7.28458	10.509	0.528703	2.07415	0.0003	0.00221024	yes
XLOC_017818	XLOC_017818	Dpp3	19:4907228-4928287	Control_PFC	Experimental_PFC	OK	11.5141	15.3084	0.410923	1.93603	0.0011	0.00692755	yes
XLOC_017820	XLOC_017820	Npas4	19:4984354-4989971	Control_PFC	Experimental_PFC	OK	9.13628	7.24443	-0.334734	-1.56798	0.0066	0.0319756	yes
XLOC_017821	XLOC_017821	Tmem151a	19:5070858-5085531	Control_PFC	Experimental_PFC	OK	33.8149	44.8759	0.408282	1.63388	0.00055	0.00378661	yes
XLOC_017823	XLOC_017823	Rab1b	19:5099206-5106996	Control_PFC	Experimental_PFC	OK	46.5267	57.6956	0.310403	1.46593	0.0103	0.0463783	yes
XLOC_017828	XLOC_017828	Cst6	19:5344704-5349574	Control_PFC	Experimental_PFC	OK	0.693307	1.27876	0.883175	2.40264	0.00025	0.00188079	yes
XLOC_017834	XLOC_017834	Ccdc85b	19:5456788-5457397	Control_PFC	Experimental_PFC	OK	22.756	42.4381	0.89911	3.71306	5e-05	0.000434753	yes
XLOC_017844	XLOC_017844	Ehbp1l1	19:5707375-5726317	Control_PFC	Experimental_PFC	OK	6.08844	8.36209	0.457791	2.07823	0.00035	0.00253699	yes
XLOC_017845	XLOC_017845	Fam89b,Sssca1	19:5727205-5731732	Control_PFC	Experimental_PFC	OK	27.3123	38.5421	0.496885	2.03314	0.00035	0.00253699	yes
XLOC_017848	XLOC_017848	Gm27702,Neat1	19:5824651-5845478	Control_PFC	Experimental_PFC	OK	17.449	12.4246	-0.48995	-1.42558	0.00875	0.0405077	yes
XLOC_017858	XLOC_017858	Gm28374,Tm7sf2,Vps51,Zfpl1	19:6062820-6084944	Control_PFC	Experimental_PFC	OK	35.7611	47.1477	0.398797	1.43347	0.0079	0.037161	yes
XLOC_017859	XLOC_017859	Sac3d1	19:6116003-6118586	Control_PFC	Experimental_PFC	OK	5.14647	8.73867	0.76383	2.7102	5e-05	0.000434753	yes
XLOC_017861	XLOC_017861	Arl2	19:6134373-6172476	Control_PFC	Experimental_PFC	OK	19.9539	25.429	0.349804	1.52654	0.0077	0.0363874	yes
XLOC_017871	XLOC_017871	Rps6ka4	19:6829084-6840601	Control_PFC	Experimental_PFC	OK	9.25373	12.3531	0.416762	1.41611	0.00565	0.0280641	yes
XLOC_017876	XLOC_017876	Kcnk4	19:6925709-6934515	Control_PFC	Experimental_PFC	OK	4.27489	6.58266	0.622786	2.23002	0.0001	0.000825347	yes
XLOC_017887	XLOC_017887	Cox8a	19:7215157-7217616	Control_PFC	Experimental_PFC	OK	574.239	812.343	0.500437	2.12579	0.0003	0.00221024	yes
XLOC_017888	XLOC_017888	Naa40	19:7225667-7241222	Control_PFC	Experimental_PFC	OK	8.16859	6.19102	-0.39991	-1.83162	0.0015	0.00906687	yes
XLOC_017911	XLOC_017911	Snora57	19:8883731-8897890	Control_PFC	Experimental_PFC	OK	60.0251	227.402	1.9216	1.86536	0.00545	0.0272053	yes
XLOC_017921	XLOC_017921	Fads2	19:10064163-10101503	Control_PFC	Experimental_PFC	OK	40.4095	30.7576	-0.39375	-1.84376	0.00165	0.00984883	yes
XLOC_017926	XLOC_017926	Lrrc10b	19:10455370-10457447	Control_PFC	Experimental_PFC	OK	4.26034	17.4491	2.03411	7.383	5e-05	0.000434753	yes
XLOC_017935	XLOC_017935	Tmem132a	19:10839726-10869940	Control_PFC	Experimental_PFC	OK	58.9304	89.4807	0.602565	2.54295	5e-05	0.000434753	yes
XLOC_018009	XLOC_018009	Tle4	19:14448071-14598051	Control_PFC	Experimental_PFC	OK	14.0694	21.0299	0.57988	2.73028	5e-05	0.000434753	yes
XLOC_018021	XLOC_018021	Gcnt1	19:17326140-17356667	Control_PFC	Experimental_PFC	OK	2.45679	0.513997	-2.25695	-5.44594	5e-05	0.000434753	yes
XLOC_018038	XLOC_018038	Smc5	19:23206440-23273897	Control_PFC	Experimental_PFC	OK	7.70852	6.09426	-0.339003	-1.59935	0.0056	0.027847	yes
XLOC_018043	XLOC_018043	Fxn	19:24261452-24280605	Control_PFC	Experimental_PFC	OK	2.79565	4.09245	0.549781	1.47967	0.0099	0.0448848	yes
XLOC_018046	XLOC_018046	Pgm5	19:24683015-24861855	Control_PFC	Experimental_PFC	OK	3.34562	1.62476	-1.04205	-1.77074	0.0028	0.0154813	yes
XLOC_018077	XLOC_018077	Gldc	19:30098448-30175418	Control_PFC	Experimental_PFC	OK	8.77439	6.43877	-0.446514	-2.10156	0.00025	0.00188079	yes
XLOC_018123	XLOC_018123	Myof	19:37899035-38043577	Control_PFC	Experimental_PFC	OK	1.27199	0.563445	-1.17474	-3.72788	5e-05	0.000434753	yes
XLOC_018125	XLOC_018125	Rbp4	19:38116619-38125321	Control_PFC	Experimental_PFC	OK	7.14983	11.1764	0.644478	2.18728	0.0004	0.00285605	yes
XLOC_018156	XLOC_018156	Avpi1	19:42123272-42129059	Control_PFC	Experimental_PFC	OK	12.1976	22.8877	0.907978	3.78109	5e-05	0.000434753	yes
XLOC_018159	XLOC_018159	Crtac1	19:42283036-42431783	Control_PFC	Experimental_PFC	OK	15.9211	12.0106	-0.406627	-1.90416	0.00105	0.00665123	yes
XLOC_018181	XLOC_018181	Scd1	19:44394450-44407709	Control_PFC	Experimental_PFC	OK	34.6548	27.411	-0.338298	-1.5563	0.00655	0.0317811	yes
XLOC_018182	XLOC_018182	Gm20538,Ndufb8,Sec31b	19:44516956-44555440	Control_PFC	Experimental_PFC	OK	152.314	265.234	0.800223	3.68515	5e-05	0.000434753	yes
XLOC_018195	XLOC_018195	Fbxw4	19:45560614-45660312	Control_PFC	Experimental_PFC	OK	19.5226	38.441	0.977502	2.58687	5e-05	0.000434753	yes
XLOC_018199	XLOC_018199	Kcnip2	19:45791838-45816061	Control_PFC	Experimental_PFC	OK	44.6098	63.2221	0.503066	2.13429	0.00015	0.00118995	yes
XLOC_018205	XLOC_018205	Psd	19:46304736-46327156	Control_PFC	Experimental_PFC	OK	77.4527	102.392	0.402722	1.63685	0.0046	0.0235668	yes
XLOC_018206	XLOC_018206	Cuedc2	19:46328183-46338660	Control_PFC	Experimental_PFC	OK	27.0092	36.2055	0.42276	1.78316	0.00265	0.0147724	yes
XLOC_018209	XLOC_018209	Arl3	19:46531108-46573085	Control_PFC	Experimental_PFC	OK	50.1369	63.1411	0.332708	1.56697	0.0063	0.0307574	yes
XLOC_018214	XLOC_018214	Usmg5	19:47067747-47090625	Control_PFC	Experimental_PFC	OK	207.844	332.782	0.679074	2.89455	5e-05	0.000434753	yes
XLOC_018230	XLOC_018230	Sorcs1	19:50143300-50778662	Control_PFC	Experimental_PFC	OK	10.8961	15.0024	0.461372	1.99279	0.0007	0.00467802	yes
XLOC_018251	XLOC_018251	Afap1l2	19:56912360-57008228	Control_PFC	Experimental_PFC	OK	3.89783	2.44771	-0.671239	-1.91433	0.00055	0.00378661	yes
XLOC_018258	XLOC_018258	Hspa12a	19:58795750-58860984	Control_PFC	Experimental_PFC	OK	30.2964	38.0055	0.327064	1.45883	0.01005	0.0454545	yes
XLOC_018260	XLOC_018260	Shtn1	19:58973357-59076069	Control_PFC	Experimental_PFC	OK	8.78568	5.83392	-0.590688	-2.76067	5e-05	0.000434753	yes
XLOC_018274	XLOC_018274	Sfxn4	19:60837276-60861479	Control_PFC	Experimental_PFC	OK	8.00668	10.8617	0.439975	1.66525	0.0044	0.0226874	yes
XLOC_018304	XLOC_018304	Bend7	2:4717830-4802142	Control_PFC	Experimental_PFC	OK	1.56054	0.744358	-1.06798	-2.30656	5e-05	0.000434753	yes
XLOC_018319	XLOC_018319	Usp6nl	2:6322666-6446390	Control_PFC	Experimental_PFC	OK	5.25849	3.81027	-0.464757	-1.71477	0.0011	0.00692755	yes
XLOC_018337	XLOC_018337	Itih5	2:10153570-10256529	Control_PFC	Experimental_PFC	OK	5.42411	4.3087	-0.332132	-1.58015	0.00555	0.0276319	yes
XLOC_018484	XLOC_018484	Vim	2:13573926-13582826	Control_PFC	Experimental_PFC	OK	20.8066	12.6343	-0.719703	-2.43823	5e-05	0.000434753	yes
XLOC_018522	XLOC_018522	Bmi1	2:18677017-18686629	Control_PFC	Experimental_PFC	OK	26.1749	17.0604	-0.617532	-1.49844	0.0081	0.0379642	yes
XLOC_018545	XLOC_018545	Gpr158	2:21341924-21830547	Control_PFC	Experimental_PFC	OK	35.3486	45.6052	0.367545	1.52251	0.00865	0.0401111	yes
XLOC_018579	XLOC_018579	Gm38383	2:24588565-24591225	Control_PFC	Experimental_PFC	OK	2.03941	1.14923	-0.827475	-2.3183	5e-05	0.000434753	yes
XLOC_018585	XLOC_018585	Pnpla7	2:24976032-25054057	Control_PFC	Experimental_PFC	OK	5.21295	3.20972	-0.699653	-1.26073	0.01115	0.0496097	yes
XLOC_018609	XLOC_018609	Edf1	2:25557846-25562082	Control_PFC	Experimental_PFC	OK	84.2468	107.685	0.354129	1.66953	0.00335	0.0180342	yes
XLOC_018627	XLOC_018627	Gpsm1	2:26315514-26352110	Control_PFC	Experimental_PFC	OK	43.9073	13.1794	-1.73618	-3.5501	5e-05	0.000434753	yes
XLOC_018633	XLOC_018633	Egfl7,Fam69b,Gm20532	2:26580013-26636497	Control_PFC	Experimental_PFC	OK	47.5332	63.4628	0.416975	1.64139	0.0032	0.0173398	yes
XLOC_018651	XLOC_018651	Col5a1	2:27882924-28039514	Control_PFC	Experimental_PFC	OK	1.90771	1.26471	-0.593037	-1.95985	0.0017	0.0100963	yes
XLOC_018664	XLOC_018664	Ak8	2:28700163-28813165	Control_PFC	Experimental_PFC	OK	0.481714	1.07599	1.15942	1.14608	0.00495	0.0250703	yes
XLOC_018670	XLOC_018670	Med27	2:29346818-29524793	Control_PFC	Experimental_PFC	OK	13.2306	20.319	0.618945	1.94208	0.0004	0.00285605	yes
XLOC_018680	XLOC_018680	Odf2	2:29889220-29931746	Control_PFC	Experimental_PFC	OK	33.4987	23.6153	-0.504384	-1.63373	0.0025	0.0140585	yes
XLOC_018718	XLOC_018718	Ppapdc3	2:32095527-32110820	Control_PFC	Experimental_PFC	OK	11.1983	15.0569	0.427146	1.9077	0.0011	0.00692755	yes
XLOC_018729	XLOC_018729	Ptges2	2:32395895-32405772	Control_PFC	Experimental_PFC	OK	16.9666	30.7778	0.859195	2.7368	5e-05	0.000434753	yes
XLOC_018743	XLOC_018743	Tor2a	2:32757025-32775633	Control_PFC	Experimental_PFC	OK	10.858	15.7338	0.53511	1.74935	0.00145	0.00880112	yes
XLOC_018748	XLOC_018748	Rpl12	2:32876113-32965345	Control_PFC	Experimental_PFC	OK	151.712	276.897	0.868021	0.939147	0.00075	0.00496726	yes
XLOC_018758	XLOC_018758	C79798	2:34171456-34373142	Control_PFC	Experimental_PFC	OK	3.39003	0.694529	-2.28719	-2.42488	0.00025	0.00188079	yes
XLOC_018768	XLOC_018768	Cntrl	2:35109491-35178822	Control_PFC	Experimental_PFC	OK	4.43685	2.81842	-0.654652	-1.58766	0.00285	0.015712	yes
XLOC_018831	XLOC_018831	Olfml2a	2:38931977-38963753	Control_PFC	Experimental_PFC	OK	0.944849	0.478893	-0.980381	-2.68596	5e-05	0.000434753	yes
XLOC_018835	XLOC_018835	Arpc5l	2:39008075-39015877	Control_PFC	Experimental_PFC	OK	35.4465	53.068	0.5822	2.54594	5e-05	0.000434753	yes
XLOC_018849	XLOC_018849	Arhgap15	2:43748823-44395953	Control_PFC	Experimental_PFC	OK	3.51746	5.86959	0.738725	2.56553	5e-05	0.000434753	yes
XLOC_018874	XLOC_018874	Lypd6b	2:49787687-49948849	Control_PFC	Experimental_PFC	OK	2.44427	4.33925	0.828043	2.28528	5e-05	0.000434753	yes
XLOC_018876	XLOC_018876	Gm13483	2:50296809-50433967	Control_PFC	Experimental_PFC	OK	1.54511	3.03253	0.972809	1.76908	0.0044	0.0226874	yes
XLOC_018898	XLOC_018898	Galnt13	2:54436316-55118309	Control_PFC	Experimental_PFC	OK	14.8445	21.7055	0.548136	1.66546	0.0038	0.0200491	yes
XLOC_018987	XLOC_018987	Phospho2	2:69789622-69800005	Control_PFC	Experimental_PFC	OK	8.77629	15.523	0.822721	3.04953	5e-05	0.000434753	yes
XLOC_018992	XLOC_018992	Myo3b	2:70038910-70429198	Control_PFC	Experimental_PFC	OK	0.552196	0.987712	0.838912	1.55504	0.00165	0.00984883	yes
XLOC_018996	XLOC_018996	Gad1	2:70489939-70602014	Control_PFC	Experimental_PFC	OK	150.006	106.107	-0.499494	-1.60211	0.0043	0.0222504	yes
XLOC_019007	XLOC_019007	Dlx1	2:71453275-71537891	Control_PFC	Experimental_PFC	OK	29.015	11.3405	-1.35531	-2.86205	5e-05	0.000434753	yes
XLOC_019018	XLOC_019018	Cdca7	2:72476158-72486893	Control_PFC	Experimental_PFC	OK	2.4925	1.45177	-0.779778	-1.54699	0.00355	0.0189337	yes
XLOC_019028	XLOC_019028	Sp9	2:73271924-73337818	Control_PFC	Experimental_PFC	OK	2.75733	0.930163	-1.56772	-1.91736	0.0035	0.0187064	yes
XLOC_019088	XLOC_019088	Ssfa2	2:79635351-79672966	Control_PFC	Experimental_PFC	OK	11.2981	8.09967	-0.480139	-1.62544	0.00545	0.0272053	yes
XLOC_019097	XLOC_019097	Dusp19,Nup35	2:80617044-80658906	Control_PFC	Experimental_PFC	OK	12.0978	16.9526	0.486763	2.00751	0.0004	0.00285605	yes
XLOC_019099	XLOC_019099	Gm4735	2:80837140-80838442	Control_PFC	Experimental_PFC	OK	24.9729	30.9161	0.307992	1.47165	0.0107	0.0478777	yes
XLOC_019102	XLOC_019102	Zfp804a	2:82053221-82259879	Control_PFC	Experimental_PFC	OK	6.16538	4.32582	-0.511215	-2.19639	0.0002	0.00154481	yes
XLOC_019112	XLOC_019112	Fam171b	2:83812635-83883486	Control_PFC	Experimental_PFC	OK	59.2311	42.5504	-0.477181	-1.19276	0.00375	0.0198305	yes
XLOC_019125	XLOC_019125	Ypel4	2:84734057-84738655	Control_PFC	Experimental_PFC	OK	27.1088	18.7195	-0.53422	-2.37528	5e-05	0.000434753	yes
XLOC_019127	XLOC_019127	Timm10	2:84826996-84830213	Control_PFC	Experimental_PFC	OK	16.9162	23.3168	0.462962	1.79627	0.0016	0.00958802	yes
XLOC_019137	XLOC_019137	Gm13716	2:85196931-85198675	Control_PFC	Experimental_PFC	OK	11.7234	6.83152	-0.779113	-2.49469	5e-05	0.000434753	yes
XLOC_019251	XLOC_019251	C1qtnf4	2:90885859-90890525	Control_PFC	Experimental_PFC	OK	50.1259	98.1874	0.969982	4.5425	5e-05	0.000434753	yes
XLOC_019264	XLOC_019264	Lrp4	2:91457510-91513779	Control_PFC	Experimental_PFC	OK	9.61078	7.49251	-0.359205	-1.53357	0.0057	0.0282782	yes
XLOC_019284	XLOC_019284	Syt13	2:92915097-92956058	Control_PFC	Experimental_PFC	OK	47.0592	65.917	0.486174	2.15787	0.0003	0.00221024	yes
XLOC_019301	XLOC_019301	Lrrc4c	2:96318168-97631666	Control_PFC	Experimental_PFC	OK	32.5232	41.5242	0.352483	1.34792	0.0094	0.0429841	yes
XLOC_019353	XLOC_019353	Pax6	2:105536079-105697364	Control_PFC	Experimental_PFC	OK	7.25061	2.08969	-1.79481	-3.82974	5e-05	0.000434753	yes
XLOC_019375	XLOC_019375	Lgr4	2:109917646-110014257	Control_PFC	Experimental_PFC	OK	10.7673	6.64204	-0.696956	-2.53897	5e-05	0.000434753	yes
XLOC_019413	XLOC_019413	Fmn1	2:113327735-113716767	Control_PFC	Experimental_PFC	OK	16.8757	22.5039	0.41523	1.53211	0.0074	0.0351869	yes
XLOC_019458	XLOC_019458	Gm14137	2:119172499-119217049	Control_PFC	Experimental_PFC	OK	1.35938	0.67624	-1.00734	-1.54382	0.0086	0.0399088	yes
XLOC_019463	XLOC_019463	Vps18	2:119288739-119298453	Control_PFC	Experimental_PFC	OK	11.8631	15.9866	0.430378	2.02158	0.00045	0.00317388	yes
XLOC_019472	XLOC_019472	Itpka	2:119742336-119751263	Control_PFC	Experimental_PFC	OK	52.1307	82.8431	0.668248	3.09852	5e-05	0.000434753	yes
XLOC_019490	XLOC_019490	Ckmt1	2:121357713-121387168	Control_PFC	Experimental_PFC	OK	91.7126	134.048	0.547561	2.21921	0.00015	0.00118995	yes
XLOC_019506	XLOC_019506	Sord	2:122234748-122265340	Control_PFC	Experimental_PFC	OK	4.34646	6.20326	0.513185	2.02085	0.00065	0.00438462	yes
XLOC_019532	XLOC_019532	Gm17555	2:126215099-126216212	Control_PFC	Experimental_PFC	OK	11.929	7.23989	-0.720433	-2.63385	5e-05	0.000434753	yes
XLOC_019539	XLOC_019539	Blvra	2:127070664-127097084	Control_PFC	Experimental_PFC	OK	6.89375	10.2091	0.5665	1.98498	0.0006	0.00409089	yes
XLOC_019554	XLOC_019554	Bcl2l11	2:128126037-128162547	Control_PFC	Experimental_PFC	OK	1.91771	1.14333	-0.74614	-1.43524	0.00365	0.0193807	yes
XLOC_019564	XLOC_019564	Zc3h6	2:128966592-129021756	Control_PFC	Experimental_PFC	OK	6.15304	4.69432	-0.390384	-1.55857	0.0061	0.0299196	yes
XLOC_019593	XLOC_019593	Itpa	2:130667609-130681614	Control_PFC	Experimental_PFC	OK	14.0524	19.7249	0.489199	2.07926	0.00025	0.00188079	yes
XLOC_019605	XLOC_019605	Smox	2:131491495-131525922	Control_PFC	Experimental_PFC	OK	26.996	37.6915	0.481494	1.53528	0.007	0.0335834	yes
XLOC_019637	XLOC_019637	Lamp5	2:136052238-136069917	Control_PFC	Experimental_PFC	OK	56.0993	72.6113	0.372212	1.72115	0.0025	0.0140585	yes
XLOC_019656	XLOC_019656	Ndufaf5	2:140170648-140203689	Control_PFC	Experimental_PFC	OK	17.8452	24.6271	0.464709	1.95225	0.00095	0.00609393	yes
XLOC_019669	XLOC_019669	Pcsk2	2:143535475-143816285	Control_PFC	Experimental_PFC	OK	79.7047	109.624	0.459832	1.69237	0.0034	0.0182591	yes
XLOC_019683	XLOC_019683	Gm561	2:144594053-144595366	Control_PFC	Experimental_PFC	OK	14.9184	21.1743	0.505219	1.61345	0.0061	0.0299196	yes
XLOC_019710	XLOC_019710	Sstr4	2:148395343-148396767	Control_PFC	Experimental_PFC	OK	11.0495	14.7377	0.415535	1.78898	0.00135	0.00827436	yes
XLOC_019725	XLOC_019725	Syndig1	2:149829210-150004392	Control_PFC	Experimental_PFC	OK	17.6595	31.9029	0.853245	2.92083	5e-05	0.000434753	yes
XLOC_019785	XLOC_019785	Xkr7	2:153031851-153055775	Control_PFC	Experimental_PFC	OK	1.45028	2.17121	0.58217	1.72749	0.0025	0.0140585	yes
XLOC_019822	XLOC_019822	Raly,a	2:154791095-155051012	Control_PFC	Experimental_PFC	OK	38.4579	53.2667	0.469954	1.59783	0.004	0.0209331	yes
XLOC_019825	XLOC_019825	Dynlrb1	2:155236532-155250277	Control_PFC	Experimental_PFC	OK	79.0132	103.582	0.3906	1.83559	0.0008	0.00525136	yes
XLOC_019826	XLOC_019826	Map1lc3a	2:155276296-155278073	Control_PFC	Experimental_PFC	OK	91.6422	131.066	0.516207	2.39425	5e-05	0.000434753	yes
XLOC_019840	XLOC_019840	Ergic3	2:156008044-156018279	Control_PFC	Experimental_PFC	OK	45.0227	63.5645	0.497569	1.8752	0.00135	0.00827436	yes
XLOC_019850	XLOC_019850	Aar2	2:156547583-156568972	Control_PFC	Experimental_PFC	OK	10.4248	13.9607	0.421345	1.85153	0.0011	0.00692755	yes
XLOC_019867	XLOC_019867	Vstm2l	2:157914652-157944719	Control_PFC	Experimental_PFC	OK	22.5649	30.6307	0.440894	2.0781	0.00025	0.00188079	yes
XLOC_019868	XLOC_019868	Rprd1b	2:158028496-158146436	Control_PFC	Experimental_PFC	OK	19.4723	43.3881	1.15587	2.69789	5e-05	0.000434753	yes
XLOC_019881	XLOC_019881	Ppp1r16b	2:158665397-158766334	Control_PFC	Experimental_PFC	OK	36.8818	47.3064	0.359125	1.52714	0.00795	0.0373681	yes
XLOC_019891	XLOC_019891	Top1	2:160645887-160722764	Control_PFC	Experimental_PFC	OK	29.8346	22.7709	-0.389793	-1.4408	0.00995	0.0450865	yes
XLOC_019909	XLOC_019909	Mybl2	2:163054686-163084688	Control_PFC	Experimental_PFC	OK	1.04303	0.282919	-1.88232	-1.32879	0.00025	0.00188079	yes
XLOC_019934	XLOC_019934	Dbndd2,Gm20458,Sys1	2:164456963-164493319	Control_PFC	Experimental_PFC	OK	50.8754	80.4909	0.661859	2.71898	5e-05	0.000434753	yes
XLOC_019960	XLOC_019960	Eya2	2:165595031-165771727	Control_PFC	Experimental_PFC	OK	3.38051	0.67763	-2.31867	-2.21649	5e-05	0.000434753	yes
XLOC_019992	XLOC_019992	Mocs3	2:168230621-168232594	Control_PFC	Experimental_PFC	OK	3.18368	5.31302	0.738835	2.54566	5e-05	0.000434753	yes
XLOC_020002	XLOC_020002	Tshz2	2:169633012-170071816	Control_PFC	Experimental_PFC	OK	5.34501	2.70751	-0.981228	-2.92945	5e-05	0.000434753	yes
XLOC_020008	XLOC_020008	Dok5	2:170731806-170879769	Control_PFC	Experimental_PFC	OK	7.69709	10.0516	0.385046	1.60742	0.00455	0.0233511	yes
XLOC_020064	XLOC_020064	Gm2026	2:175965330-175980303	Control_PFC	Experimental_PFC	OK	2.8005	1.55931	-0.844777	-1.47943	0.00795	0.0373681	yes
XLOC_020081	XLOC_020081	Gm14420	2:177464732-177478129	Control_PFC	Experimental_PFC	OK	24.1643	17.5724	-0.459571	-1.85608	0.0012	0.00747245	yes
XLOC_020104	XLOC_020104	Rps21	2:180257376-180258445	Control_PFC	Experimental_PFC	OK	324.346	434.88	0.423084	1.99415	0.00035	0.00253699	yes
XLOC_020119	XLOC_020119	Gm27032,Mir124a-3	2:180894039-180895220	Control_PFC	Experimental_PFC	OK	12.2792	7.38446	-0.733646	-2.13539	5e-05	0.000434753	yes
XLOC_020125	XLOC_020125	Ppdpf	2:181187246-181188771	Control_PFC	Experimental_PFC	OK	28.0915	40.2538	0.518991	2.2016	0.00015	0.00118995	yes
XLOC_020129	XLOC_020129	Rtel1	2:181319738-181356616	Control_PFC	Experimental_PFC	OK	9.18902	6.1337	-0.583154	-1.41663	0.00895	0.0412846	yes
XLOC_020131	XLOC_020131	Slc2a4rg-ps	2:181384249-181387586	Control_PFC	Experimental_PFC	OK	3.55368	1.90535	-0.899254	-3.02113	5e-05	0.000434753	yes
XLOC_020139	XLOC_020139	Oprl1	2:181715015-181720985	Control_PFC	Experimental_PFC	OK	11.4265	17.0642	0.578592	2.30722	0.00015	0.00118995	yes
XLOC_020140	XLOC_020140	Myt1	2:181763331-181827797	Control_PFC	Experimental_PFC	OK	6.09586	3.2733	-0.897085	-1.89503	0.00055	0.00378661	yes
XLOC_020168	XLOC_020168	Optn	2:5020641-5064051	Control_PFC	Experimental_PFC	OK	5.70394	4.15189	-0.45819	-1.59788	0.00485	0.0246483	yes
XLOC_020175	XLOC_020175	Dhtkd1	2:5895509-5942792	Control_PFC	Experimental_PFC	OK	38.5249	26.5525	-0.536945	-2.16593	0.0003	0.00221024	yes
XLOC_020195	XLOC_020195	Atp5c1	2:10056015-10080510	Control_PFC	Experimental_PFC	OK	114.454	160.871	0.491142	2.25302	0.00015	0.00118995	yes
XLOC_020197	XLOC_020197	Itih2	2:10094592-10131396	Control_PFC	Experimental_PFC	OK	1.75272	0.876439	-0.999868	-1.62969	0.00175	0.01035	yes
XLOC_020219	XLOC_020219	Gm37701	2:12106631-12312315	Control_PFC	Experimental_PFC	OK	13.0374	8.64363	-0.592951	-1.75619	0.00215	0.0123726	yes
XLOC_020231	XLOC_020231	Trdmt1	2:13509013-13544668	Control_PFC	Experimental_PFC	OK	2.07846	1.25193	-0.73136	-1.33892	0.0108	0.0482642	yes
XLOC_020307	XLOC_020307	Gm13416	2:24592901-24594513	Control_PFC	Experimental_PFC	OK	0.916961	0.375472	-1.28815	-2.03796	0.0017	0.0100963	yes
XLOC_020323	XLOC_020323	Tubb4b	2:25218744-25224702	Control_PFC	Experimental_PFC	OK	107.492	137.231	0.352388	1.58804	0.00545	0.0272053	yes
XLOC_020328	XLOC_020328	Ssna1	2:25271038-25272438	Control_PFC	Experimental_PFC	OK	20.3652	33.5411	0.719824	3.07664	5e-05	0.000434753	yes
XLOC_020332	XLOC_020332	Uap1l1	2:25359888-25365682	Control_PFC	Experimental_PFC	OK	5.28387	9.99624	0.919791	1.68597	0.00235	0.0133425	yes
XLOC_020334	XLOC_020334	Ptgds	2:25466708-25470046	Control_PFC	Experimental_PFC	OK	639.556	387.654	-0.722304	-2.88061	5e-05	0.000434753	yes
XLOC_020368	XLOC_020368	Snhg7	2:26637846-26637985	Control_PFC	Experimental_PFC	OK	45.9742	99.2027	1.10956	1.32724	0.0105	0.0471333	yes
XLOC_020369	XLOC_020369	Snora17	2:26639189-26639321	Control_PFC	Experimental_PFC	OK	77.227	189.705	1.29658	1.99902	0.0033	0.0177984	yes
XLOC_020380	XLOC_020380	Fam163b	2:27110379-27142491	Control_PFC	Experimental_PFC	OK	18.0171	14.412	-0.322093	-1.50747	0.0078	0.03678	yes
XLOC_020385	XLOC_020385	Gm25541	2:27539804-27539930	Control_PFC	Experimental_PFC	OK	1174.39	2082.01	0.82606	2.77123	5e-05	0.000434753	yes
XLOC_020401	XLOC_020401	Gm13394	2:28926948-29055066	Control_PFC	Experimental_PFC	OK	197.31	249.613	0.33923	1.51606	0.00785	0.0369682	yes
XLOC_020422	XLOC_020422	Ier5l	2:30471536-30474219	Control_PFC	Experimental_PFC	OK	5.29885	9.20413	0.796604	3.46879	5e-05	0.000434753	yes
XLOC_020449	XLOC_020449	Slc25a25	2:32414486-32456953	Control_PFC	Experimental_PFC	OK	21.3206	31.6593	0.57038	1.75352	0.0039	0.0204924	yes
XLOC_020475	XLOC_020475	Pbx3	2:34171456-34373142	Control_PFC	Experimental_PFC	OK	33.4267	10.1766	-1.71575	-4.86865	5e-05	0.000434753	yes
XLOC_020480	XLOC_020480	Rabepk	2:34777555-34799912	Control_PFC	Experimental_PFC	OK	10.9376	15.4482	0.49815	1.58023	0.00635	0.0309589	yes
XLOC_020493	XLOC_020493	Ggta1	2:35400178-35463231	Control_PFC	Experimental_PFC	OK	1.45336	0.749681	-0.955044	-1.19713	0.0049	0.0248537	yes
XLOC_020498	XLOC_020498	Ttll11	2:35751240-35979913	Control_PFC	Experimental_PFC	OK	11.2145	17.7265	0.660549	2.28479	0.00015	0.00118995	yes
XLOC_020534	XLOC_020534	Rpl35	2:38996712-39006168	Control_PFC	Experimental_PFC	OK	66.7212	86.2392	0.370198	1.52079	0.0087	0.0403201	yes
XLOC_020564	XLOC_020564	Mmadhc	2:50279880-50296801	Control_PFC	Experimental_PFC	OK	17.0935	22.1997	0.377091	1.612	0.0053	0.0265686	yes
XLOC_020576	XLOC_020576	Rbm43	2:51924447-51935163	Control_PFC	Experimental_PFC	OK	4.23681	6.27637	0.566952	1.87122	0.00065	0.00438462	yes
XLOC_020579	XLOC_020579	Neb	2:52136646-52338798	Control_PFC	Experimental_PFC	OK	1.16106	0.194134	-2.58032	-1.76394	5e-05	0.000434753	yes
XLOC_020595	XLOC_020595	Nr4a2	2:57106829-57124003	Control_PFC	Experimental_PFC	OK	5.88733	8.95966	0.605831	2.1538	0.0001	0.000825347	yes
XLOC_020618	XLOC_020618	Cd302	2:60251992-60284488	Control_PFC	Experimental_PFC	OK	6.68316	9.6702	0.533014	1.98813	0.0005	0.00348019	yes
XLOC_020651	XLOC_020651	Scn3a	2:65457117-65567627	Control_PFC	Experimental_PFC	OK	13.9339	11.095	-0.328693	-1.46973	0.0099	0.0448848	yes
XLOC_020657	XLOC_020657	Scn1a	2:66270777-66440840	Control_PFC	Experimental_PFC	OK	29.2427	38.0754	0.380782	1.54187	0.00625	0.0305581	yes
XLOC_020688	XLOC_020688	Dlx2	2:71543407-71546754	Control_PFC	Experimental_PFC	OK	3.22449	0.903699	-1.83516	-4.1641	5e-05	0.000434753	yes
XLOC_020700	XLOC_020700	Ola1	2:73092800-73218924	Control_PFC	Experimental_PFC	OK	31.0271	40.5456	0.386016	1.60621	0.0059	0.0291076	yes
XLOC_020711	XLOC_020711	Lnp	2:74520290-74584544	Control_PFC	Experimental_PFC	OK	32.1962	53.0635	0.720829	2.2914	5e-05	0.000434753	yes
XLOC_020726	XLOC_020726	Nfe2l2	2:75675512-75704641	Control_PFC	Experimental_PFC	OK	5.90103	3.98502	-0.566382	-2.19049	0.0001	0.000825347	yes
XLOC_020738	XLOC_020738	Ccdc141	2:77009901-77170636	Control_PFC	Experimental_PFC	OK	9.10726	6.33444	-0.523801	-1.4059	0.00915	0.042016	yes
XLOC_020784	XLOC_020784	Serping1	2:84765386-84775444	Control_PFC	Experimental_PFC	OK	1.99922	1.17321	-0.768976	-1.71429	0.00275	0.01525	yes
XLOC_020790	XLOC_020790	Lrrc55	2:85160777-85196699	Control_PFC	Experimental_PFC	OK	9.96188	4.59382	-1.11672	-4.81333	5e-05	0.000434753	yes
XLOC_020815	XLOC_020815	Gm13722	2:86090335-86093401	Control_PFC	Experimental_PFC	OK	37.3254	24.0403	-0.634703	-2.98008	5e-05	0.000434753	yes
XLOC_021016	XLOC_021016	Gyltl1b	2:92365045-92381217	Control_PFC	Experimental_PFC	OK	0.64946	0.232539	-1.48177	-0.598097	0.0063	0.0307574	yes
XLOC_021026	XLOC_021026	Tspan18	2:93201759-93334505	Control_PFC	Experimental_PFC	OK	1.21393	0.543022	-1.1606	-1.60834	0.00115	0.00719815	yes
XLOC_021028	XLOC_021028	Cd82	2:93419110-93469871	Control_PFC	Experimental_PFC	OK	9.31686	6.47674	-0.524575	-1.59242	0.00315	0.0171177	yes
XLOC_021089	XLOC_021089	Qser1	2:104754794-104816696	Control_PFC	Experimental_PFC	OK	3.78873	2.75017	-0.462194	-2.17495	0.0002	0.00154481	yes
XLOC_021091	XLOC_021091	Eif3m	2:104867804-105017904	Control_PFC	Experimental_PFC	OK	32.8497	41.9277	0.352026	1.53147	0.0066	0.0319756	yes
XLOC_021098	XLOC_021098	Rcn1	2:105386290-105399319	Control_PFC	Experimental_PFC	OK	7.68972	13.1211	0.770886	3.44995	5e-05	0.000434753	yes
XLOC_021113	XLOC_021113	Gm9864	2:107595629-107600539	Control_PFC	Experimental_PFC	OK	27.1812	21.5817	-0.332801	-1.57826	0.00685	0.0329618	yes
XLOC_021174	XLOC_021174	Grem1	2:113746163-113758646	Control_PFC	Experimental_PFC	OK	0.838046	0.268504	-1.64209	-3.47007	5e-05	0.000434753	yes
XLOC_021175	XLOC_021175	Scg5	2:113776361-113829121	Control_PFC	Experimental_PFC	OK	222.033	323.014	0.540821	2.26918	5e-05	0.000434753	yes
XLOC_021190	XLOC_021190	Meis2	2:115863063-116065839	Control_PFC	Experimental_PFC	OK	112.456	68.8118	-0.70863	-1.52338	0.00585	0.0289118	yes
XLOC_021191	XLOC_021191	2700033N17Rik	2:116066217-116085911	Control_PFC	Experimental_PFC	OK	3.74047	1.07904	-1.79348	-2.29977	0.0015	0.00906687	yes
XLOC_021207	XLOC_021207	Srp14	2:118475849-118479711	Control_PFC	Experimental_PFC	OK	61.8693	79.2864	0.357849	1.67412	0.00395	0.0207122	yes
XLOC_021212	XLOC_021212	A430105I19Rik	2:118754157-118762661	Control_PFC	Experimental_PFC	OK	2.33141	1.55775	-0.581737	-1.68363	0.00385	0.0202747	yes
XLOC_021214	XLOC_021214	Ccdc32	2:119017778-119029393	Control_PFC	Experimental_PFC	OK	16.2455	21.3979	0.397432	1.8279	0.00175	0.01035	yes
XLOC_021278	XLOC_021278	Slc30a4	2:122681232-122721456	Control_PFC	Experimental_PFC	OK	14.1324	19.7298	0.481365	2.2369	5e-05	0.000434753	yes
XLOC_021282	XLOC_021282	Myef2	2:125068123-125123661	Control_PFC	Experimental_PFC	OK	28.8899	21.4412	-0.430179	-1.77286	0.00165	0.00984883	yes
XLOC_021317	XLOC_021317	1500011K16Rik	2:127791387-127792488	Control_PFC	Experimental_PFC	OK	20.2442	32.0487	0.662753	2.84969	5e-05	0.000434753	yes
XLOC_021328	XLOC_021328	4933427J07Rik	2:128955670-128957861	Control_PFC	Experimental_PFC	OK	23.9518	13.2648	-0.852533	-3.88791	5e-05	0.000434753	yes
XLOC_021346	XLOC_021346	Pdyn	2:129686564-129699844	Control_PFC	Experimental_PFC	OK	9.0189	19.4874	1.11152	4.51349	5e-05	0.000434753	yes
XLOC_021351	XLOC_021351	Cpxm1	2:130390774-130397574	Control_PFC	Experimental_PFC	OK	2.63351	1.5222	-0.790831	-2.0014	0.0004	0.00285605	yes
XLOC_021357	XLOC_021357	Lzts3	2:130632838-130642803	Control_PFC	Experimental_PFC	OK	46.9638	64.7823	0.46405	2.04273	0.0005	0.00348019	yes
XLOC_021363	XLOC_021363	Adam33	2:131050590-131063814	Control_PFC	Experimental_PFC	OK	3.4125	2.05558	-0.731285	-1.45152	0.0048	0.0244327	yes
XLOC_021372	XLOC_021372	Adra1d	2:131545849-131563179	Control_PFC	Experimental_PFC	OK	10.9274	15.0518	0.46199	2.10562	0.0004	0.00285605	yes
XLOC_021380	XLOC_021380	Prokr2	2:132337732-132385447	Control_PFC	Experimental_PFC	OK	1.5258	0.36076	-2.08045	-2.17205	5e-05	0.000434753	yes
XLOC_021411	XLOC_021411	Tasp1	2:139833479-140066805	Control_PFC	Experimental_PFC	OK	16.8458	32.241	0.93651	4.39518	5e-05	0.000434753	yes
XLOC_021434	XLOC_021434	Snord17	2:144250122-144281227	Control_PFC	Experimental_PFC	OK	1135.65	3130.37	1.46282	5.22054	5e-05	0.000434753	yes
XLOC_021523	XLOC_021523	Sox12	2:152393610-152398063	Control_PFC	Experimental_PFC	OK	3.05204	1.99107	-0.61623	-2.35955	0.0001	0.000825347	yes
XLOC_021577	XLOC_021577	Eif6	2:155819831-155834854	Control_PFC	Experimental_PFC	OK	20.9304	26.6254	0.347201	1.54788	0.0059	0.0291076	yes
XLOC_021586	XLOC_021586	Scand1	2:156311846-156375638	Control_PFC	Experimental_PFC	OK	10.2215	26.2028	1.35812	4.43445	5e-05	0.000434753	yes
XLOC_021590	XLOC_021590	2900097C17Rik	2:156391830-156392979	Control_PFC	Experimental_PFC	OK	116.867	162.25	0.473346	2.18177	0.00025	0.00188079	yes
XLOC_021603	XLOC_021603	Sla2	2:156863127-156887192	Control_PFC	Experimental_PFC	OK	4.33905	6.35907	0.551436	1.81086	0.00175	0.01035	yes
XLOC_021610	XLOC_021610	Soga1	2:157015798-157079254	Control_PFC	Experimental_PFC	OK	8.60419	4.70268	-0.871555	-2.3273	0.0003	0.00221024	yes
XLOC_021627	XLOC_021627	Gm23925,Gm26003,Snhg17	2:158353699-158361580	Control_PFC	Experimental_PFC	OK	151.368	569.786	1.91236	2.09381	0.0078	0.03678	yes
XLOC_021631	XLOC_021631	Gm14204	2:158595471-158610723	Control_PFC	Experimental_PFC	OK	5.82171	2.36137	-1.30182	-2.75445	5e-05	0.000434753	yes
XLOC_021638	XLOC_021638	Mafb	2:160363702-160367065	Control_PFC	Experimental_PFC	OK	2.95638	4.22127	0.513846	2.01904	0.00075	0.00496726	yes
XLOC_021666	XLOC_021666	Kcns1	2:164163618-164171113	Control_PFC	Experimental_PFC	OK	2.96686	6.54643	1.14177	4.40212	5e-05	0.000434753	yes
XLOC_021675	XLOC_021675	Matn4	2:164389392-164415448	Control_PFC	Experimental_PFC	OK	3.76041	2.31315	-0.701034	-2.14392	0.0003	0.00221024	yes
XLOC_021704	XLOC_021704	Slc13a3	2:165405027-165473230	Control_PFC	Experimental_PFC	OK	7.45062	3.04014	-1.29322	-3.89046	5e-05	0.000434753	yes
XLOC_021709	XLOC_021709	Gm22692	2:165908050-165908175	Control_PFC	Experimental_PFC	OK	19.1115	0	#NAME?	#NAME?	0.0054	0.0269987	yes
XLOC_021754	XLOC_021754	Gm26883	2:169633012-170071816	Control_PFC	Experimental_PFC	OK	2.33172	1.22603	-0.927401	-2.52893	5e-05	0.000434753	yes
XLOC_021776	XLOC_021776	Bmp7	2:172868011-172940321	Control_PFC	Experimental_PFC	OK	3.81431	2.34213	-0.703604	-2.25035	0.00045	0.00317388	yes
XLOC_021796	XLOC_021796	Atp5e	2:174461071-174464105	Control_PFC	Experimental_PFC	OK	131.061	236.67	0.852641	3.97087	5e-05	0.000434753	yes
XLOC_021805	XLOC_021805	Gm14443	2:175166254-175175871	Control_PFC	Experimental_PFC	OK	5.25627	3.53557	-0.572097	-2.00238	0.00025	0.00188079	yes
XLOC_021806	XLOC_021806	Gm14391	2:175191064-175206917	Control_PFC	Experimental_PFC	OK	16.3129	11.354	-0.522807	-2.43301	5e-05	0.000434753	yes
XLOC_021809	XLOC_021809	Gm4631	2:175321954-175338197	Control_PFC	Experimental_PFC	OK	29.5868	22.9761	-0.364819	-1.70853	0.0025	0.0140585	yes
XLOC_021827	XLOC_021827	Gm14421	2:177053515-177056838	Control_PFC	Experimental_PFC	OK	2.93284	1.78462	-0.716683	-2.06546	0.0005	0.00348019	yes
XLOC_021835	XLOC_021835	Gm14412	2:177314519-177324307	Control_PFC	Experimental_PFC	OK	4.54547	3.16124	-0.523938	-1.64417	0.00455	0.0233511	yes
XLOC_021845	XLOC_021845	Gm26869	2:178023283-178034022	Control_PFC	Experimental_PFC	OK	6.88138	4.80442	-0.518337	-1.76153	0.0025	0.0140585	yes
XLOC_021848	XLOC_021848	Ppp1r3d	2:178411205-178414472	Control_PFC	Experimental_PFC	OK	2.34792	3.3956	0.532287	1.93938	0.00105	0.00665123	yes
XLOC_021852	XLOC_021852	Psma7	2:180036372-180042433	Control_PFC	Experimental_PFC	OK	61.4336	82.6603	0.428167	1.91096	0.0008	0.00525136	yes
XLOC_021853	XLOC_021853	Hrh3	2:180099464-180104488	Control_PFC	Experimental_PFC	OK	21.5946	29.4944	0.449771	1.88637	0.0007	0.00467802	yes
XLOC_021874	XLOC_021874	Stmn3	2:181306458-181314500	Control_PFC	Experimental_PFC	OK	193.844	299.177	0.626106	2.70787	5e-05	0.000434753	yes
XLOC_021927	XLOC_021927	Fabp5	3:10012547-10016607	Control_PFC	Experimental_PFC	OK	27.3228	36.0423	0.399583	1.85711	0.00155	0.00932883	yes
XLOC_021951	XLOC_021951	Car13	3:14641726-14663002	Control_PFC	Experimental_PFC	OK	1.44726	0.623929	-1.21387	-2.73239	5e-05	0.000434753	yes
XLOC_021985	XLOC_021985	Cp	3:19957053-20035315	Control_PFC	Experimental_PFC	OK	5.94465	3.2068	-0.890455	-1.5756	0.00265	0.0147724	yes
XLOC_022016	XLOC_022016	Nceh1	3:27182964-27284608	Control_PFC	Experimental_PFC	OK	26.5645	37.0612	0.48041	1.59647	0.0062	0.0303457	yes
XLOC_022028	XLOC_022028	Eif5a2	3:28781275-28798846	Control_PFC	Experimental_PFC	OK	14.4226	17.954	0.315975	1.49034	0.009	0.0414631	yes
XLOC_022029	XLOC_022029	Rpl22l1	3:28805435-28813985	Control_PFC	Experimental_PFC	OK	37.9663	60.4928	0.672046	2.76073	5e-05	0.000434753	yes
XLOC_022032	XLOC_022032	Egfem1	3:29082022-29691209	Control_PFC	Experimental_PFC	OK	10.3653	20.557	0.987864	2.29926	0.0002	0.00154481	yes
XLOC_022054	XLOC_022054	Gm38025	3:31341011-31345280	Control_PFC	Experimental_PFC	OK	1.10616	0.491474	-1.17037	-2.40641	0.00045	0.00317388	yes
XLOC_022078	XLOC_022078	Gm27403,Gm27611,Mir1897,RP23-423J10.7,Sox2ot	3:34104269-34682746	Control_PFC	Experimental_PFC	OK	20.1606	9.34187	-1.10975	-1.68494	0.00105	0.00665123	yes
XLOC_022126	XLOC_022126	Fat4	3:38874569-39011985	Control_PFC	Experimental_PFC	OK	4.68488	2.87649	-0.703702	-2.90717	5e-05	0.000434753	yes
XLOC_022129	XLOC_022129	RP23-256D7.2	3:39823576-39827411	Control_PFC	Experimental_PFC	OK	15.3987	10.1888	-0.595816	-2.79564	5e-05	0.000434753	yes
XLOC_022146	XLOC_022146	Gm37846	3:42163864-42167638	Control_PFC	Experimental_PFC	OK	0.876932	0.350004	-1.32509	-2.91573	5e-05	0.000434753	yes
XLOC_022149	XLOC_022149	Gm36976	3:43547172-43548282	Control_PFC	Experimental_PFC	OK	7.14418	4.8704	-0.552728	-1.75944	0.00195	0.0113736	yes
XLOC_022151	XLOC_022151	Gm37746	3:43955720-43955918	Control_PFC	Experimental_PFC	OK	38.1273	15.1405	-1.33241	-2.49499	0.00035	0.00253699	yes
XLOC_022199	XLOC_022199	Foxo1	3:52268335-52353221	Control_PFC	Experimental_PFC	OK	2.12539	3.27061	0.621832	2.72154	5e-05	0.000434753	yes
XLOC_022205	XLOC_022205	Lhfp	3:53038584-53261679	Control_PFC	Experimental_PFC	OK	15.6936	11.0699	-0.503537	-1.92337	0.00105	0.00665123	yes
XLOC_022206	XLOC_022206	RP23-372C7.4	3:53038584-53261679	Control_PFC	Experimental_PFC	OK	1.7101	0.533156	-1.68145	-1.86171	0.00395	0.0207122	yes
XLOC_022223	XLOC_022223	Trpc4	3:54156034-54318471	Control_PFC	Experimental_PFC	OK	9.90148	5.71414	-0.793108	-3.51601	5e-05	0.000434753	yes
XLOC_022252	XLOC_022252	RP23-1B20.4	3:58079715-58081834	Control_PFC	Experimental_PFC	OK	9.04303	5.76285	-0.650023	-2.69442	5e-05	0.000434753	yes
XLOC_022287	XLOC_022287	P2ry1	3:61001638-61008982	Control_PFC	Experimental_PFC	OK	1.43916	2.10012	0.545247	1.58212	0.00625	0.0305581	yes
XLOC_022289	XLOC_022289	Gm37404	3:62123206-62123565	Control_PFC	Experimental_PFC	OK	92.0436	47.5645	-0.952431	-3.89198	5e-05	0.000434753	yes
XLOC_022293	XLOC_022293	Mme	3:63241536-63386030	Control_PFC	Experimental_PFC	OK	2.60055	6.1044	1.23103	2.43404	5e-05	0.000434753	yes
XLOC_022301	XLOC_022301	Gm26850	3:63933506-63968659	Control_PFC	Experimental_PFC	OK	5.10577	8.75357	0.777743	1.9242	0.00095	0.00609393	yes
XLOC_022313	XLOC_022313	Kcnab1	3:64949222-65378223	Control_PFC	Experimental_PFC	OK	25.949	52.8787	1.02701	2.78975	5e-05	0.000434753	yes
XLOC_022341	XLOC_022341	1110032F04Rik	3:68867916-68872163	Control_PFC	Experimental_PFC	OK	5.07658	8.08597	0.671563	2.76375	5e-05	0.000434753	yes
XLOC_022375	XLOC_022375	Fstl5	3:76074269-76710019	Control_PFC	Experimental_PFC	OK	10.1524	4.4265	-1.19758	-4.382	5e-05	0.000434753	yes
XLOC_022405	XLOC_022405	Ctso	3:81932600-81956725	Control_PFC	Experimental_PFC	OK	7.2867	5.57506	-0.386279	-1.53254	0.00745	0.0353851	yes
XLOC_022436	XLOC_022436	Lrba	3:86224679-86782692	Control_PFC	Experimental_PFC	OK	24.4347	16.6485	-0.553539	-2.2568	0.0001	0.000825347	yes
XLOC_022472	XLOC_022472	Paqr6	3:88364583-88368541	Control_PFC	Experimental_PFC	OK	3.23364	1.32915	-1.28266	-2.78251	5e-05	0.000434753	yes
XLOC_022477	XLOC_022477	Mex3a	3:88532394-88541396	Control_PFC	Experimental_PFC	OK	1.21578	0.707405	-0.781277	-2.41164	5e-05	0.000434753	yes
XLOC_022479	XLOC_022479	Ssr2	3:88575875-88588419	Control_PFC	Experimental_PFC	OK	26.1863	33.2561	0.344808	1.58761	0.00525	0.0263478	yes
XLOC_022493	XLOC_022493	Clk2	3:89164794-89176921	Control_PFC	Experimental_PFC	OK	14.2497	10.3323	-0.463766	-1.7642	0.00155	0.00932883	yes
XLOC_022501	XLOC_022501	Dpm3	3:89259357-89267079	Control_PFC	Experimental_PFC	OK	22.7441	38.0335	0.741781	2.56279	5e-05	0.000434753	yes
XLOC_022528	XLOC_022528	Jtb	3:90231596-90235838	Control_PFC	Experimental_PFC	OK	17.4722	24.8543	0.508435	2.20468	0.0001	0.000825347	yes
XLOC_022556	XLOC_022556	RP23-381I16.6	3:92170220-92177907	Control_PFC	Experimental_PFC	OK	0.944289	0.572292	-0.722477	-1.95924	0.00145	0.00880112	yes
XLOC_022598	XLOC_022598	Tchh	3:93306467-93465359	Control_PFC	Experimental_PFC	OK	1.29053	0.764196	-0.755947	-2.30649	0.0001	0.000825347	yes
XLOC_022664	XLOC_022664	RP23-231L15.4	3:95639303-95641045	Control_PFC	Experimental_PFC	OK	1.712	1.00446	-0.769254	-1.75286	0.0026	0.0145401	yes
XLOC_022679	XLOC_022679	Hist2h2ab	3:96196587-96220308	Control_PFC	Experimental_PFC	OK	3.30933	8.84741	1.41872	1.69693	0.00755	0.0358025	yes
XLOC_022681	XLOC_022681	Hist2h2be	3:96221118-96223738	Control_PFC	Experimental_PFC	OK	2.57414	1.70077	-0.597903	-1.83768	0.0022	0.0126201	yes
XLOC_022685	XLOC_022685	Hist2h3b	3:96267074-96279001	Control_PFC	Experimental_PFC	OK	3.56521	10.4788	1.55542	2.00979	0.0021	0.0121275	yes
XLOC_022686	XLOC_022686	Hist2h2bb	3:96267074-96279001	Control_PFC	Experimental_PFC	OK	31.2918	57.1784	0.869687	2.80653	5e-05	0.000434753	yes
XLOC_022718	XLOC_022718	Notch2	3:98013526-98150361	Control_PFC	Experimental_PFC	OK	9.42423	4.31091	-1.12838	-3.80697	5e-05	0.000434753	yes
XLOC_022723	XLOC_022723	Hmgcs2	3:98280434-98310738	Control_PFC	Experimental_PFC	OK	2.93763	1.71618	-0.775447	-2.46881	0.0001	0.000825347	yes
XLOC_022751	XLOC_022751	Igsf3	3:101377082-101463059	Control_PFC	Experimental_PFC	OK	9.29799	4.43467	-1.06809	-4.2133	5e-05	0.000434753	yes
XLOC_022808	XLOC_022808	Ppm1j	3:104752726-104786018	Control_PFC	Experimental_PFC	OK	2.76525	0.323858	-3.09398	-2.83166	5e-05	0.000434753	yes
XLOC_022813	XLOC_022813	Kcnd3	3:105441594-105674002	Control_PFC	Experimental_PFC	OK	18.5474	12.0237	-0.625345	-2.14757	5e-05	0.000434753	yes
XLOC_022815	XLOC_022815	Fam212b	3:105704598-105720842	Control_PFC	Experimental_PFC	OK	26.4926	34.7596	0.391821	1.62235	0.0048	0.0244327	yes
XLOC_022829	XLOC_022829	Gm38271	3:106589259-106590862	Control_PFC	Experimental_PFC	OK	7.01019	4.28137	-0.711381	-2.50591	5e-05	0.000434753	yes
XLOC_022838	XLOC_022838	Slc16a4	3:107291229-107312115	Control_PFC	Experimental_PFC	OK	2.90288	1.5445	-0.910342	-2.66622	5e-05	0.000434753	yes
XLOC_022856	XLOC_022856	Psma5	3:108248908-108279974	Control_PFC	Experimental_PFC	OK	31.274	45.0834	0.52763	2.48372	5e-05	0.000434753	yes
XLOC_022890	XLOC_022890	Col11a1	3:114030539-114220718	Control_PFC	Experimental_PFC	OK	2.35432	1.20479	-0.966523	-2.91119	5e-05	0.000434753	yes
XLOC_022900	XLOC_022900	Extl2	3:116007461-116029017	Control_PFC	Experimental_PFC	OK	18.0919	26.7651	0.565009	1.75666	0.00095	0.00609393	yes
XLOC_022922	XLOC_022922	Lppr5	3:117574835-117689507	Control_PFC	Experimental_PFC	OK	11.2462	8.72287	-0.366566	-1.71506	0.00315	0.0171177	yes
XLOC_022925	XLOC_022925	Gm24155,Gm9916	3:118430323-118530022	Control_PFC	Experimental_PFC	OK	45.5687	4.40227	-3.37172	-8.06994	5e-05	0.000434753	yes
XLOC_022927	XLOC_022927	Gm37928	3:118530882-118535013	Control_PFC	Experimental_PFC	OK	2.79131	1.96694	-0.504991	-1.87273	0.00105	0.00665123	yes
XLOC_022928	XLOC_022928	Gm32444	3:118537020-118540531	Control_PFC	Experimental_PFC	OK	1.59023	1.0494	-0.599667	-1.7544	0.003	0.0164048	yes
XLOC_022940	XLOC_022940	Cnn3	3:121424235-121458207	Control_PFC	Experimental_PFC	OK	27.3467	18.7519	-0.544327	-2.27434	5e-05	0.000434753	yes
XLOC_022946	XLOC_022946	Arhgap29	3:121952540-122016753	Control_PFC	Experimental_PFC	OK	10.3114	7.58414	-0.443176	-1.72221	0.0014	0.00853755	yes
XLOC_022958	XLOC_022958	1810037I17Rik	3:122924202-122926184	Control_PFC	Experimental_PFC	OK	18.8983	29.3952	0.637328	2.94563	5e-05	0.000434753	yes
XLOC_022974	XLOC_022974	Ndst4	3:125404075-125728899	Control_PFC	Experimental_PFC	OK	6.07611	1.61311	-1.9133	-3.01113	5e-05	0.000434753	yes
XLOC_022980	XLOC_022980	Camk2d	3:126596301-126846326	Control_PFC	Experimental_PFC	OK	40.3345	25.6154	-0.655001	-2.25936	5e-05	0.000434753	yes
XLOC_023032	XLOC_023032	Etnppl	3:130617447-130637521	Control_PFC	Experimental_PFC	OK	9.19804	6.25055	-0.557345	-2.00978	0.00045	0.00317388	yes
XLOC_023056	XLOC_023056	Ppa2	3:133310109-133378235	Control_PFC	Experimental_PFC	OK	19.2745	24.8662	0.367492	1.60322	0.00485	0.0246483	yes
XLOC_023061	XLOC_023061	Cxxc4	3:133830667-134262161	Control_PFC	Experimental_PFC	OK	9.01716	6.4223	-0.489585	-1.7699	0.00215	0.0123726	yes
XLOC_023062	XLOC_023062	RP23-384A11.5	3:134357291-134357501	Control_PFC	Experimental_PFC	OK	52.4806	33.8493	-0.632657	-1.57983	0.007	0.0335834	yes
XLOC_023072	XLOC_023072	Bdh2	3:135281220-135304426	Control_PFC	Experimental_PFC	OK	0.947086	0.444689	-1.0907	-1.35201	0.01075	0.0480791	yes
XLOC_023085	XLOC_023085	Ppp3ca	3:136670123-136937727	Control_PFC	Experimental_PFC	OK	271.382	431.049	0.667525	1.43086	0.011	0.0490571	yes
XLOC_023092	XLOC_023092	Ddit4l	3:137621611-137628333	Control_PFC	Experimental_PFC	OK	4.42683	7.37288	0.735954	1.57138	0.0038	0.0200491	yes
XLOC_023093	XLOC_023093	Gm21962	3:137671523-137672540	Control_PFC	Experimental_PFC	OK	66.0627	38.5538	-0.776963	-3.69622	5e-05	0.000434753	yes
XLOC_023096	XLOC_023096	H2afz	3:137864486-137866922	Control_PFC	Experimental_PFC	OK	82.0752	113.041	0.461835	1.91499	0.00075	0.00496726	yes
XLOC_023113	XLOC_023113	Tspan5	3:138742194-138907905	Control_PFC	Experimental_PFC	OK	73.7688	95.7238	0.375867	1.40173	0.00985	0.0447019	yes
XLOC_023126	XLOC_023126	Gbp2	3:142620601-142638008	Control_PFC	Experimental_PFC	OK	1.26224	0.676905	-0.898958	-1.64952	0.0036	0.0191544	yes
XLOC_023134	XLOC_023134	RP23-49B23.1	3:143017659-143040752	Control_PFC	Experimental_PFC	OK	2.09322	0.779337	-1.4254	-1.74758	0.00445	0.0229075	yes
XLOC_023150	XLOC_023150	2022-09-15	3:144570303-144597680	Control_PFC	Experimental_PFC	OK	66.8838	90.6292	0.438319	1.87866	0.00115	0.00719815	yes
XLOC_023167	XLOC_023167	Syde2	3:145987869-146021720	Control_PFC	Experimental_PFC	OK	1.67555	1.04736	-0.677867	-1.41305	0.00385	0.0202747	yes
XLOC_023236	XLOC_023236	Gm37102	3:155903347-155904452	Control_PFC	Experimental_PFC	OK	9.35628	4.96928	-0.912899	-3.0133	5e-05	0.000434753	yes
XLOC_023237	XLOC_023237	Gm37515	3:155904508-155908325	Control_PFC	Experimental_PFC	OK	16.6011	10.7076	-0.632643	-2.9637	5e-05	0.000434753	yes
XLOC_023268	XLOC_023268	Wls	3:159839671-159938664	Control_PFC	Experimental_PFC	OK	17.7438	13.1549	-0.431714	-1.80309	0.00205	0.0118768	yes
XLOC_023313	XLOC_023313	Gm38310	3:10220994-10223433	Control_PFC	Experimental_PFC	OK	0.843384	0.434777	-0.955916	-1.86522	0.00285	0.015712	yes
XLOC_023431	XLOC_023431	Pex5l	3:32939313-33143247	Control_PFC	Experimental_PFC	OK	79.0731	106.99	0.436211	1.57968	0.00435	0.0224687	yes
XLOC_023447	XLOC_023447	Gm20515	3:34104269-34682746	Control_PFC	Experimental_PFC	OK	1.52677	0.462796	-1.72203	-1.90451	0.00195	0.0113736	yes
XLOC_023469	XLOC_023469	Gm11549	3:36515056-36521813	Control_PFC	Experimental_PFC	OK	8.75937	14.0698	0.683702	3.16984	5e-05	0.000434753	yes
XLOC_023534	XLOC_023534	Gm38124	3:45269986-45272567	Control_PFC	Experimental_PFC	OK	0.889379	0.528152	-0.751845	-1.58659	0.00975	0.0443123	yes
XLOC_023555	XLOC_023555	Pcdh18	3:49743295-49757325	Control_PFC	Experimental_PFC	OK	2.75594	1.45665	-0.91989	-2.11647	0.00015	0.00118995	yes
XLOC_023557	XLOC_023557	Slc7a11	3:49892525-50443614	Control_PFC	Experimental_PFC	OK	8.68361	4.69096	-0.888413	-1.79837	0.0023	0.0130957	yes
XLOC_023570	XLOC_023570	Elf2	3:51252719-51340663	Control_PFC	Experimental_PFC	OK	31.3797	49.2941	0.651582	2.57935	5e-05	0.000434753	yes
XLOC_023580	XLOC_023580	Maml3	3:51685906-52105076	Control_PFC	Experimental_PFC	OK	4.2448	2.56798	-0.725063	-2.02043	0.0005	0.00348019	yes
XLOC_023590	XLOC_023590	C130089K02Rik	3:51685906-52105076	Control_PFC	Experimental_PFC	OK	1.79075	0.744429	-1.26635	-2.48955	5e-05	0.000434753	yes
XLOC_023634	XLOC_023634	Wwtr1	3:57455648-57575910	Control_PFC	Experimental_PFC	OK	4.53885	3.35326	-0.436762	-1.90766	0.00095	0.00609393	yes
XLOC_023680	XLOC_023680	B430305J03Rik	3:61358548-61368430	Control_PFC	Experimental_PFC	OK	7.21715	10.7306	0.572236	1.99647	0.00075	0.00496726	yes
XLOC_023737	XLOC_023737	Gm37601	3:67684358-67684752	Control_PFC	Experimental_PFC	OK	26.5725	16.7431	-0.666372	-2.05104	0.0006	0.00409089	yes
XLOC_023781	XLOC_023781	Pdcd10	3:75516489-75556856	Control_PFC	Experimental_PFC	OK	19.6928	28.7412	0.545457	1.68209	0.0023	0.0130957	yes
XLOC_023784	XLOC_023784	Golim4	3:75875083-76001136	Control_PFC	Experimental_PFC	OK	6.31704	3.93321	-0.683544	-1.93454	0.00155	0.00932883	yes
XLOC_023801	XLOC_023801	Rxfp1	3:79641610-79737880	Control_PFC	Experimental_PFC	OK	4.04499	1.91871	-1.076	-3.65286	5e-05	0.000434753	yes
XLOC_023861	XLOC_023861	Dclk2	3:86786150-86920852	Control_PFC	Experimental_PFC	OK	27.5539	17.6202	-0.645028	-2.47945	5e-05	0.000434753	yes
XLOC_023865	XLOC_023865	Kirrel	3:87078592-87174747	Control_PFC	Experimental_PFC	OK	1.39945	0.917847	-0.608536	-1.63168	0.0048	0.0244327	yes
XLOC_023875	XLOC_023875	Apoa1bp	3:88056519-88058495	Control_PFC	Experimental_PFC	OK	27.9779	39.8332	0.509686	2.38147	5e-05	0.000434753	yes
XLOC_023915	XLOC_023915	Efna1	3:89271732-89281142	Control_PFC	Experimental_PFC	OK	1.15383	1.84538	0.677485	1.4974	0.0095	0.0433594	yes
XLOC_023916	XLOC_023916	Efna3	3:89313898-89322965	Control_PFC	Experimental_PFC	OK	12.1959	20.6947	0.762861	2.71395	5e-05	0.000434753	yes
XLOC_023934	XLOC_023934	Rps27	3:90212521-90213651	Control_PFC	Experimental_PFC	OK	446.707	632.718	0.502232	2.33132	5e-05	0.000434753	yes
XLOC_023939	XLOC_023939	Npr1	3:90450590-90465866	Control_PFC	Experimental_PFC	OK	2.53781	0.51458	-2.30212	-2.49376	5e-05	0.000434753	yes
XLOC_024041	XLOC_024041	Cgn	3:94760068-94786492	Control_PFC	Experimental_PFC	OK	1.21139	0.695996	-0.799511	-1.9151	0.0012	0.00747245	yes
XLOC_024042	XLOC_024042	Psmb4	3:94884092-94886961	Control_PFC	Experimental_PFC	OK	69.041	109.314	0.662953	2.56947	0.0001	0.000825347	yes
XLOC_024069	XLOC_024069	Mrps21	3:95862633-95871519	Control_PFC	Experimental_PFC	OK	43.1401	62.5439	0.53584	2.19825	0.0001	0.000825347	yes
XLOC_024070	XLOC_024070	Ciart	3:95871521-95892005	Control_PFC	Experimental_PFC	OK	6.4783	9.89217	0.61067	1.62668	0.00345	0.0184791	yes
XLOC_024079	XLOC_024079	Hist2h2ac	3:96220360-96220880	Control_PFC	Experimental_PFC	OK	9.33141	16.9383	0.860123	2.53775	5e-05	0.000434753	yes
XLOC_024084	XLOC_024084	Hist2h4	3:96261681-96263311	Control_PFC	Experimental_PFC	OK	9.30521	19.9899	1.10316	4.84693	5e-05	0.000434753	yes
XLOC_024093	XLOC_024093	Terc	3:96414436-96414859	Control_PFC	Experimental_PFC	OK	0.811698	4.03799	2.31462	2.28543	0.0068	0.0327479	yes
XLOC_024100	XLOC_024100	Polr3gl	3:96576983-96594181	Control_PFC	Experimental_PFC	OK	9.8251	6.09594	-0.688624	-1.84496	0.0017	0.0100963	yes
XLOC_024123	XLOC_024123	Phgdh	3:98313169-98339990	Control_PFC	Experimental_PFC	OK	18.5032	23.5693	0.349132	1.5819	0.0058	0.028702	yes
XLOC_024125	XLOC_024125	RP23-381G13.3	3:98382460-98763127	Control_PFC	Experimental_PFC	OK	25.361	15.8679	-0.676495	-2.01897	0.0004	0.00285605	yes
XLOC_024165	XLOC_024165	Ptgfrn	3:101040231-101110278	Control_PFC	Experimental_PFC	OK	9.92117	12.9492	0.384277	1.62087	0.00355	0.0189337	yes
XLOC_024239	XLOC_024239	Atp5f1	3:105942697-105987423	Control_PFC	Experimental_PFC	OK	93.0115	123.843	0.413035	1.50135	0.00605	0.0297195	yes
XLOC_024264	XLOC_024264	Csf1	3:107741047-107760469	Control_PFC	Experimental_PFC	OK	5.3149	3.52866	-0.590924	-1.90718	0.0013	0.0080057	yes
XLOC_024279	XLOC_024279	Ampd2	3:108074061-108088011	Control_PFC	Experimental_PFC	OK	33.249	17.3024	-0.942341	-3.00099	5e-05	0.000434753	yes
XLOC_024294	XLOC_024294	Scarna2	3:108554337-108554751	Control_PFC	Experimental_PFC	OK	248.492	419.305	0.7548	3.53878	5e-05	0.000434753	yes
XLOC_024303	XLOC_024303	Fam102b	3:108970996-109027607	Control_PFC	Experimental_PFC	OK	14.6293	10.3651	-0.497133	-2.31373	5e-05	0.000434753	yes
XLOC_024307	XLOC_024307	Ntng1	3:109780039-110144011	Control_PFC	Experimental_PFC	OK	11.1473	7.62844	-0.547229	-1.85275	0.00075	0.00496726	yes
XLOC_024328	XLOC_024328	Amy1,Rnpc3	3:113555709-113630149	Control_PFC	Experimental_PFC	OK	23.607	15.2244	-0.632825	-2.17958	0.0001	0.000825347	yes
XLOC_024341	XLOC_024341	Gpr88	3:116249653-116253503	Control_PFC	Experimental_PFC	OK	17.6875	64.6082	1.86899	6.42728	5e-05	0.000434753	yes
XLOC_024360	XLOC_024360	Snx7	3:117781646-117868936	Control_PFC	Experimental_PFC	OK	12.7894	9.00268	-0.506523	-1.94027	0.00065	0.00438462	yes
XLOC_024370	XLOC_024370	RP23-324P1.1	3:120604108-120886733	Control_PFC	Experimental_PFC	OK	321.366	203.98	-0.65579	-1.65045	0.0063	0.0307574	yes
XLOC_024375	XLOC_024375	Tmem56	3:121201760-121283098	Control_PFC	Experimental_PFC	OK	15.1527	19.862	0.390433	1.36853	0.0059	0.0291076	yes
XLOC_024429	XLOC_024429	RP23-446O11.1	3:125216914-125219553	Control_PFC	Experimental_PFC	OK	3.63855	11.4111	1.649	6.60789	5e-05	0.000434753	yes
XLOC_024472	XLOC_024472	Ccdc109b	3:129914959-129970206	Control_PFC	Experimental_PFC	OK	2.64313	0.994207	-1.41063	-1.84632	0.00065	0.00438462	yes
XLOC_024475	XLOC_024475	Rpl34	3:130726830-130730398	Control_PFC	Experimental_PFC	OK	139.086	206.699	0.571546	2.66066	5e-05	0.000434753	yes
XLOC_024518	XLOC_024518	RP24-372J15.4	3:135428162-135435888	Control_PFC	Experimental_PFC	OK	1.13838	0.743246	-0.615069	-2.08404	0.0005	0.00348019	yes
XLOC_024574	XLOC_024574	Pdlim5	3:142239589-142395696	Control_PFC	Experimental_PFC	OK	8.63986	6.42102	-0.428207	-1.47336	0.0078	0.03678	yes
XLOC_024593	XLOC_024593	Clca3a1	3:144729676-144760977	Control_PFC	Experimental_PFC	OK	0.910645	0.0773719	-3.55701	-3.86501	5e-05	0.000434753	yes
XLOC_024650	XLOC_024650	RP24-303G10.1	3:153198265-153725174	Control_PFC	Experimental_PFC	OK	1.04294	0.342388	-1.60695	-2.05515	0.00325	0.0175643	yes
XLOC_024655	XLOC_024655	Msh4	3:153857148-153906138	Control_PFC	Experimental_PFC	OK	2.57962	1.36762	-0.915498	-2.60855	5e-05	0.000434753	yes
XLOC_024667	XLOC_024667	Gm37324	3:155771324-155775828	Control_PFC	Experimental_PFC	OK	6.11428	3.82657	-0.676131	-3.05493	5e-05	0.000434753	yes
XLOC_024696	XLOC_024696	Lyn	4:3678114-3813122	Control_PFC	Experimental_PFC	OK	4.8391	2.8716	-0.752885	-2.00207	0.00035	0.00253699	yes
XLOC_024704	XLOC_024704	Sdcbp	4:6365649-6454271	Control_PFC	Experimental_PFC	OK	63.6924	85.5337	0.425371	1.50738	0.0077	0.0363874	yes
XLOC_024714	XLOC_024714	Chd7	4:8690405-8867659	Control_PFC	Experimental_PFC	OK	4.67282	2.6107	-0.839853	-1.9451	0.0016	0.00958802	yes
XLOC_024773	XLOC_024773	Calb1	4:15881263-15908064	Control_PFC	Experimental_PFC	OK	20.807	30.8277	0.56716	1.92505	0.00065	0.00438462	yes
XLOC_024802	XLOC_024802	Pnisr	4:21847582-21876475	Control_PFC	Experimental_PFC	OK	79.6647	53.8436	-0.565165	-1.64035	0.00175	0.01035	yes
XLOC_024814	XLOC_024814	Gm11892	4:24238099-24239301	Control_PFC	Experimental_PFC	OK	2.3117	3.76461	0.703547	1.84124	0.00175	0.01035	yes
XLOC_024901	XLOC_024901	Tmem215	4:40472179-40477168	Control_PFC	Experimental_PFC	OK	4.48892	6.65275	0.567582	2.17646	0.0003	0.00221024	yes
XLOC_024982	XLOC_024982	Melk	4:44300875-44364675	Control_PFC	Experimental_PFC	OK	0.260175	0.684797	1.3962	0.928643	0.0107	0.0478777	yes
XLOC_024987	XLOC_024987	Zcchc7	4:44755876-44932215	Control_PFC	Experimental_PFC	OK	27.1327	17.087	-0.667134	-1.52095	0.0063	0.0307574	yes
XLOC_024991	XLOC_024991	Grhpr	4:44981394-44990734	Control_PFC	Experimental_PFC	OK	10.779	15.7629	0.548311	2.21527	5e-05	0.000434753	yes
XLOC_025002	XLOC_025002	Aldh1b1	4:45799021-45804604	Control_PFC	Experimental_PFC	OK	2.52149	4.3555	0.78856	1.88626	0.00155	0.00932883	yes
XLOC_025022	XLOC_025022	Sec61b	4:47474657-47483242	Control_PFC	Experimental_PFC	OK	18.4795	32.4091	0.810475	3.04648	5e-05	0.000434753	yes
XLOC_025031	XLOC_025031	Tmeff1	4:48585173-48663131	Control_PFC	Experimental_PFC	OK	47.4286	68.4459	0.529206	2.31374	0.0001	0.000825347	yes
XLOC_025104	XLOC_025104	Dnajc25,Gm20503,Gng10	4:58995061-59041903	Control_PFC	Experimental_PFC	OK	21.9415	27.9313	0.348218	1.56639	0.00505	0.0254967	yes
XLOC_025144	XLOC_025144	Rgs3	4:62559846-62704001	Control_PFC	Experimental_PFC	OK	9.48596	6.45844	-0.554607	-1.53945	0.0053	0.0265686	yes
XLOC_025151	XLOC_025151	Col27a1	4:63214003-63334991	Control_PFC	Experimental_PFC	OK	2.04959	1.03072	-0.991677	-2.71847	5e-05	0.000434753	yes
XLOC_025158	XLOC_025158	Atp6v1g1	4:63544771-63550750	Control_PFC	Experimental_PFC	OK	43.795	59.7045	0.447073	2.10071	0.0002	0.00154481	yes
XLOC_025169	XLOC_025169	Tlr4	4:66827583-66930284	Control_PFC	Experimental_PFC	OK	1.1626	0.636872	-0.868284	-1.2398	0.00545	0.0272053	yes
XLOC_025197	XLOC_025197	Frmd3	4:74013441-74202214	Control_PFC	Experimental_PFC	OK	5.40363	2.53798	-1.09025	-3.68348	5e-05	0.000434753	yes
XLOC_025222	XLOC_025222	Tyrp1	4:80834122-80851719	Control_PFC	Experimental_PFC	OK	0.737528	0.167457	-2.13891	-1.06258	0.00205	0.0118768	yes
XLOC_025223	XLOC_025223	Lurap1l	4:80910645-80955628	Control_PFC	Experimental_PFC	OK	3.43447	4.61371	0.42584	1.68466	0.0034	0.0182591	yes
XLOC_025251	XLOC_025251	Adamtsl1	4:86053914-86428385	Control_PFC	Experimental_PFC	OK	2.21947	0.888506	-1.32076	-1.55504	0.00055	0.00378661	yes
XLOC_025265	XLOC_025265	Gm26566	4:88718291-88722842	Control_PFC	Experimental_PFC	OK	14.9011	31.0163	1.05761	1.82927	0.00255	0.0143003	yes
XLOC_025335	XLOC_025335	Inadl	4:98395784-98719603	Control_PFC	Experimental_PFC	OK	7.48833	4.65636	-0.685442	-1.88288	0.0002	0.00154481	yes
XLOC_025346	XLOC_025346	Gm10305	4:99272670-99275145	Control_PFC	Experimental_PFC	OK	1.05234	0.642801	-0.711154	-1.576	0.0072	0.0343879	yes
XLOC_025368	XLOC_025368	Gm12798	4:101403080-101407856	Control_PFC	Experimental_PFC	OK	4.0789	2.39002	-0.771155	-1.60162	0.0075	0.0355876	yes
XLOC_025373	XLOC_025373	Lepr	4:101717403-101815352	Control_PFC	Experimental_PFC	OK	1.45299	0.664436	-1.12882	-0.991771	0.0088	0.0406949	yes
XLOC_025413	XLOC_025413	Tmem59	4:107126612-107200996	Control_PFC	Experimental_PFC	OK	76.3736	104.313	0.449776	1.73508	0.0027	0.0150118	yes
XLOC_025424	XLOC_025424	Lrp8	4:107802260-107876840	Control_PFC	Experimental_PFC	OK	28.8547	19.41	-0.572004	-1.43378	0.0104	0.0467574	yes
XLOC_025442	XLOC_025442	Rab3b	4:108879062-108972077	Control_PFC	Experimental_PFC	OK	24.9567	16.2523	-0.618785	-2.47767	0.0001	0.000825347	yes
XLOC_025456	XLOC_025456	Spata6	4:111719983-111829184	Control_PFC	Experimental_PFC	OK	1.9879	4.14944	1.06167	1.30196	0.0081	0.0379642	yes
XLOC_025492	XLOC_025492	Atpaf1	4:115784811-115822655	Control_PFC	Experimental_PFC	OK	14.8134	19.2097	0.374932	1.43866	0.0107	0.0478777	yes
XLOC_025504	XLOC_025504	Ipp	4:116507548-116538243	Control_PFC	Experimental_PFC	OK	6.03956	7.91849	0.390782	1.62358	0.0057	0.0282782	yes
XLOC_025525	XLOC_025525	Gm25099	4:117189941-117190057	Control_PFC	Experimental_PFC	OK	2002.06	4505.2	1.1701	3.52963	5e-05	0.000434753	yes
XLOC_025532	XLOC_025532	Eri3	4:117550364-117674297	Control_PFC	Experimental_PFC	OK	52.37	95.3909	0.865111	2.40877	0.00075	0.00496726	yes
XLOC_025534	XLOC_025534	Gm12840	4:117700187-117700923	Control_PFC	Experimental_PFC	OK	6.51525	3.92039	-0.732822	-1.77019	0.0028	0.0154813	yes
XLOC_025578	XLOC_025578	Rims3	4:120854815-120896579	Control_PFC	Experimental_PFC	OK	35.5266	49.639	0.482573	1.60149	0.00865	0.0401111	yes
XLOC_025581	XLOC_025581	Col9a2	4:121039384-121055322	Control_PFC	Experimental_PFC	OK	4.63259	8.33314	0.847041	2.17459	0.00025	0.00188079	yes
XLOC_025606	XLOC_025606	Heyl	4:123233555-123249875	Control_PFC	Experimental_PFC	OK	1.20912	0.374018	-1.69278	-1.45176	0.00055	0.00378661	yes
XLOC_025609	XLOC_025609	Gm25788	4:123262350-123298925	Control_PFC	Experimental_PFC	OK	542.991	2121.38	1.966	3.11894	0.0001	0.000825347	yes
XLOC_025610	XLOC_025610	Gm22154	4:123262350-123298925	Control_PFC	Experimental_PFC	OK	284.594	2033.75	2.83716	3.49821	5e-05	0.000434753	yes
XLOC_025624	XLOC_025624	Pou3f1	4:124528923-124660655	Control_PFC	Experimental_PFC	OK	3.91327	7.90817	1.01497	4.45753	5e-05	0.000434753	yes
XLOC_025636	XLOC_025636	Rspo1	4:124957646-125009099	Control_PFC	Experimental_PFC	OK	2.22418	4.21871	0.923527	2.44656	5e-05	0.000434753	yes
XLOC_025654	XLOC_025654	Clspn	4:126556934-126593903	Control_PFC	Experimental_PFC	OK	0.372611	1.17798	1.66058	1.5545	0.00135	0.00827436	yes
XLOC_025656	XLOC_025656	5730409E04Rik	4:126609817-126614371	Control_PFC	Experimental_PFC	OK	19.928	26.9301	0.434424	2.04226	0.0005	0.00348019	yes
XLOC_025661	XLOC_025661	Sfpq	4:127021323-127061152	Control_PFC	Experimental_PFC	OK	126.656	83.022	-0.609346	-1.71622	0.00255	0.0143003	yes
XLOC_025665	XLOC_025665	Dlgap3	4:127169203-127237022	Control_PFC	Experimental_PFC	OK	69.5393	90.2505	0.376106	1.35523	0.00785	0.0369682	yes
XLOC_025666	XLOC_025666	Smim12	4:127243783-127247809	Control_PFC	Experimental_PFC	OK	21.6231	30.7134	0.506297	2.31459	5e-05	0.000434753	yes
XLOC_025676	XLOC_025676	Trim62	4:128883579-128911328	Control_PFC	Experimental_PFC	OK	6.16451	4.17095	-0.563611	-2.46242	5e-05	0.000434753	yes
XLOC_025692	XLOC_025692	Marcksl1	4:129513580-129515985	Control_PFC	Experimental_PFC	OK	25.6036	13.9674	-0.874283	-3.9817	5e-05	0.000434753	yes
XLOC_025703	XLOC_025703	Pef1	4:130102557-130128135	Control_PFC	Experimental_PFC	OK	20.2303	34.3041	0.761862	3.59947	5e-05	0.000434753	yes
XLOC_025721	XLOC_025721	Tmem200b	4:131921770-131923140	Control_PFC	Experimental_PFC	OK	2.42387	5.90072	1.28358	3.73453	5e-05	0.000434753	yes
XLOC_025725	XLOC_025725	Gm28874	4:132265707-132268841	Control_PFC	Experimental_PFC	OK	0.786548	0.376035	-1.06467	-2.19786	0.00025	0.00188079	yes
XLOC_025728	XLOC_025728	Snhg12,Snora44,Snora61,Snord99	4:132308677-132311024	Control_PFC	Experimental_PFC	OK	961.791	2018.18	1.06926	2.66376	5e-05	0.000434753	yes
XLOC_025765	XLOC_025765	Paqr7	4:134496696-134510235	Control_PFC	Experimental_PFC	OK	21.3119	35.7639	0.746848	2.92839	5e-05	0.000434753	yes
XLOC_025768	XLOC_025768	Rsrp1	4:134923591-134927671	Control_PFC	Experimental_PFC	OK	80.6066	57.2421	-0.493821	-1.77302	0.0011	0.00692755	yes
XLOC_025808	XLOC_025808	Hspg2	4:137468768-137570630	Control_PFC	Experimental_PFC	OK	1.44606	0.811221	-0.833957	-2.7513	5e-05	0.000434753	yes
XLOC_025811	XLOC_025811	Rap1gap	4:137664725-137729861	Control_PFC	Experimental_PFC	OK	57.2209	81.6757	0.513365	1.78012	0.00085	0.00553519	yes
XLOC_025817	XLOC_025817	Kif17,Sh2d5	4:138250402-138301967	Control_PFC	Experimental_PFC	OK	24.9245	37.4817	0.58862	2.11215	0.00075	0.00496726	yes
XLOC_025818	XLOC_025818	Ddost	4:138304729-138312628	Control_PFC	Experimental_PFC	OK	27.0942	35.0677	0.372159	1.75719	0.00225	0.0128619	yes
XLOC_025831	XLOC_025831	Akr7a5	4:139310743-139318426	Control_PFC	Experimental_PFC	OK	10.0572	16.1805	0.686026	2.6736	5e-05	0.000434753	yes
XLOC_025853	XLOC_025853	Sdhb	4:140961202-140979193	Control_PFC	Experimental_PFC	OK	72.9346	102.464	0.490437	2.31338	0.0001	0.000825347	yes
XLOC_025863	XLOC_025863	Epha2	4:141301239-141329384	Control_PFC	Experimental_PFC	OK	1.16898	0.389883	-1.58414	-1.5319	0.0005	0.00348019	yes
XLOC_025974	XLOC_025974	Gm13152	4:147492416-147513486	Control_PFC	Experimental_PFC	OK	4.82278	2.96992	-0.699439	-2.04119	0.00065	0.00438462	yes
XLOC_025987	XLOC_025987	Fbxo2	4:148160620-148166424	Control_PFC	Experimental_PFC	OK	37.1028	51.4074	0.470448	2.20807	5e-05	0.000434753	yes
XLOC_025993	XLOC_025993	Srm	4:148591502-148594993	Control_PFC	Experimental_PFC	OK	23.2505	33.8046	0.539958	2.43793	5e-05	0.000434753	yes
XLOC_026038	XLOC_026038	Acot7	4:152178133-152271855	Control_PFC	Experimental_PFC	OK	91.9063	126.167	0.457101	2.08054	0.00025	0.00188079	yes
XLOC_026050	XLOC_026050	A430005L14Rik	4:153957236-153961925	Control_PFC	Experimental_PFC	OK	9.56768	14.1194	0.56144	1.95458	0.0007	0.00467802	yes
XLOC_026061	XLOC_026061	Gm13111	4:154637575-154644724	Control_PFC	Experimental_PFC	OK	3.65556	2.66175	-0.457717	-1.76231	0.0024	0.0135779	yes
XLOC_026081	XLOC_026081	Tmem240	4:155734799-155740564	Control_PFC	Experimental_PFC	OK	14.8634	21.3352	0.521471	1.6108	0.0058	0.028702	yes
XLOC_026086	XLOC_026086	Mrpl20	4:155802877-155809975	Control_PFC	Experimental_PFC	OK	33.7885	62.6081	0.889818	4.05212	5e-05	0.000434753	yes
XLOC_026087	XLOC_026087	Ccnl2	4:155812488-155824543	Control_PFC	Experimental_PFC	OK	32.4067	24.2203	-0.42008	-1.64858	0.0035	0.0187064	yes
XLOC_026088	XLOC_026088	Aurkaip1	4:155831271-155833130	Control_PFC	Experimental_PFC	OK	40.3158	70.8077	0.812562	3.63516	5e-05	0.000434753	yes
XLOC_026119	XLOC_026119	Gm11808	4:3973091-3973595	Control_PFC	Experimental_PFC	OK	3.07253	7.04762	1.19771	2.47207	0.0001	0.000825347	yes
XLOC_026123	XLOC_026123	Penk	4:4133530-4188703	Control_PFC	Experimental_PFC	OK	86.2491	232.495	1.43062	5.45748	5e-05	0.000434753	yes
XLOC_026165	XLOC_026165	Pdp1	4:11958183-11966452	Control_PFC	Experimental_PFC	OK	74.6585	114.829	0.621112	2.56377	5e-05	0.000434753	yes
XLOC_026207	XLOC_026207	Wwp1	4:19575161-19708993	Control_PFC	Experimental_PFC	OK	13.3911	10.0565	-0.413151	-1.80978	0.0012	0.00747245	yes
XLOC_026226	XLOC_026226	Klhl32	4:24612553-24851124	Control_PFC	Experimental_PFC	OK	7.0219	9.53142	0.440829	1.67295	0.00385	0.0202747	yes
XLOC_026259	XLOC_026259	Ankrd6	4:32804034-32950841	Control_PFC	Experimental_PFC	OK	17.3817	11.6999	-0.57107	-2.34689	5e-05	0.000434753	yes
XLOC_026324	XLOC_026324	Kif24	4:41390744-41464887	Control_PFC	Experimental_PFC	OK	6.88505	4.75661	-0.533532	-1.4995	0.0087	0.0403201	yes
XLOC_026331	XLOC_026331	Dctn3	4:41699988-41774247	Control_PFC	Experimental_PFC	OK	42.6143	73.3193	0.782857	1.9588	0.00065	0.00438462	yes
XLOC_026352	XLOC_026352	Stoml2	4:43027689-43053253	Control_PFC	Experimental_PFC	OK	36.0722	53.5673	0.570465	1.57344	0.00955	0.0435409	yes
XLOC_026390	XLOC_026390	Tomm5	4:45105207-45108114	Control_PFC	Experimental_PFC	OK	26.2714	44.3936	0.756861	3.27171	5e-05	0.000434753	yes
XLOC_026400	XLOC_026400	Igfbpl1	4:45809467-45826923	Control_PFC	Experimental_PFC	OK	1.66486	0.196941	-3.07956	-2.66068	5e-05	0.000434753	yes
XLOC_026430	XLOC_026430	Tmem246	4:49584505-49597876	Control_PFC	Experimental_PFC	OK	18.5474	26.6819	0.524642	1.71804	0.001	0.00637663	yes
XLOC_026446	XLOC_026446	Abca1	4:53030786-53159895	Control_PFC	Experimental_PFC	OK	11.8998	7.64847	-0.637692	-2.76369	5e-05	0.000434753	yes
XLOC_026532	XLOC_026532	Fkbp15	4:62300341-62360548	Control_PFC	Experimental_PFC	OK	11.976	9.39353	-0.350409	-1.54242	0.00665	0.0321725	yes
XLOC_026535	XLOC_026535	Wdr31	4:62448652-62470896	Control_PFC	Experimental_PFC	OK	10.9903	8.15467	-0.430531	-1.60772	0.0022	0.0126201	yes
XLOC_026589	XLOC_026589	Tmem261	4:75277353-75278305	Control_PFC	Experimental_PFC	OK	17.2269	25.357	0.557722	2.23845	0.0001	0.000825347	yes
XLOC_026606	XLOC_026606	Zdhhc21	4:82798737-82859958	Control_PFC	Experimental_PFC	OK	22.7768	35.5288	0.641422	1.68314	0.00235	0.0133425	yes
XLOC_026673	XLOC_026673	Elavl2	4:91250762-91400785	Control_PFC	Experimental_PFC	OK	29.623	49.641	0.744813	1.66807	0.0043	0.0222504	yes
XLOC_026716	XLOC_026716	Cyp2j9	4:96568428-96591578	Control_PFC	Experimental_PFC	OK	11.6256	8.85135	-0.39334	-1.76173	0.00225	0.0128619	yes
XLOC_026740	XLOC_026740	Gm12688	4:99653606-99654983	Control_PFC	Experimental_PFC	OK	0.814301	0	#NAME?	#NAME?	5e-05	0.000434753	yes
XLOC_026752	XLOC_026752	E130102H24Rik,Mir101a	4:101346530-101399181	Control_PFC	Experimental_PFC	OK	7.67345	4.58057	-0.74435	-1.48903	0.0035	0.0187064	yes
XLOC_026881	XLOC_026881	Nasp	4:116601051-116627941	Control_PFC	Experimental_PFC	OK	11.1402	8.11635	-0.45687	-1.60577	0.0041	0.0213755	yes
XLOC_026882	XLOC_026882	Akr1a1	4:116636509-116651680	Control_PFC	Experimental_PFC	OK	117.529	163.247	0.474033	2.11122	5e-05	0.000434753	yes
XLOC_026901	XLOC_026901	Rnf220	4:117271462-117500602	Control_PFC	Experimental_PFC	OK	34.6039	45.6769	0.400531	1.8226	0.00125	0.00774258	yes
XLOC_026911	XLOC_026911	Artn	4:117926161-117929763	Control_PFC	Experimental_PFC	OK	1.34624	0.208722	-2.68928	-1.43208	0.00015	0.00118995	yes
XLOC_026922	XLOC_026922	Tmem125	4:118540940-118544044	Control_PFC	Experimental_PFC	OK	2.56931	4.03252	0.650303	1.48879	0.0046	0.0235668	yes
XLOC_026958	XLOC_026958	Foxo6	4:120267078-120287349	Control_PFC	Experimental_PFC	OK	2.71713	4.11107	0.597428	2.1251	0.0004	0.00285605	yes
XLOC_026993	XLOC_026993	Ndufs5	4:123712709-123718202	Control_PFC	Experimental_PFC	OK	99.1857	133.399	0.427542	2.00947	0.0002	0.00154481	yes
XLOC_027025	XLOC_027025	Adprhl2	4:126316046-126321703	Control_PFC	Experimental_PFC	OK	9.13188	11.8908	0.380858	1.51036	0.0082	0.0383333	yes
XLOC_027058	XLOC_027058	Azin2	4:128930232-128962442	Control_PFC	Experimental_PFC	OK	14.7274	20.6124	0.485005	1.73905	0.0032	0.0173398	yes
XLOC_027060	XLOC_027060	Hpca	4:129105547-129122036	Control_PFC	Experimental_PFC	OK	201.096	396.536	0.979563	3.54227	5e-05	0.000434753	yes
XLOC_027069	XLOC_027069	Hdac1	4:129516103-129542713	Control_PFC	Experimental_PFC	OK	7.43184	5.07657	-0.549865	-1.50898	0.00725	0.0345895	yes
XLOC_027072	XLOC_027072	Eif3i	4:129591959-129600648	Control_PFC	Experimental_PFC	OK	52.3715	80.9395	0.628061	2.89457	5e-05	0.000434753	yes
XLOC_027110	XLOC_027110	Rnu11	4:132270055-132270213	Control_PFC	Experimental_PFC	OK	314.07	748.23	1.25239	3.36402	5e-05	0.000434753	yes
XLOC_027112	XLOC_027112	Trnau1ap	4:132311762-132329538	Control_PFC	Experimental_PFC	OK	7.98424	10.8473	0.442105	1.45603	0.00655	0.0317811	yes
XLOC_027113	XLOC_027113	Rcc1	4:132331918-132353686	Control_PFC	Experimental_PFC	OK	1765.8	6928.88	1.9723	4.36213	5e-05	0.000434753	yes
XLOC_027114	XLOC_027114	Snora73b	4:132331918-132353686	Control_PFC	Experimental_PFC	OK	2510.42	7510.57	1.58099	3.77883	5e-05	0.000434753	yes
XLOC_027119	XLOC_027119	Atpif1	4:132530554-132533659	Control_PFC	Experimental_PFC	OK	154.851	194.02	0.325323	1.52303	0.0077	0.0363874	yes
XLOC_027126	XLOC_027126	Gm22767	4:132826928-132843169	Control_PFC	Experimental_PFC	OK	95.3757	379.986	1.99425	3.31462	5e-05	0.000434753	yes
XLOC_027132	XLOC_027132	Sytl1	4:133253089-133263113	Control_PFC	Experimental_PFC	OK	2.46797	3.79767	0.621791	1.66542	0.0019	0.0111185	yes
XLOC_027133	XLOC_027133	Tmem222	4:133266044-133277792	Control_PFC	Experimental_PFC	OK	27.3805	35.3203	0.367351	1.68916	0.00285	0.015712	yes
XLOC_027154	XLOC_027154	Sh3bgrl3	4:134102569-134128789	Control_PFC	Experimental_PFC	OK	74.7094	100.015	0.420862	1.7856	0.00225	0.0128619	yes
XLOC_027165	XLOC_027165	Extl1	4:134356371-134383850	Control_PFC	Experimental_PFC	OK	18.8254	24.2767	0.366896	1.65934	0.0032	0.0173398	yes
XLOC_027172	XLOC_027172	Tmem50a	4:134897848-134915024	Control_PFC	Experimental_PFC	OK	30.9732	43.5074	0.490243	2.25841	0.00015	0.00118995	yes
XLOC_027175	XLOC_027175	Clic4	4:135213968-135272814	Control_PFC	Experimental_PFC	OK	19.7723	11.844	-0.739325	-3.46861	5e-05	0.000434753	yes
XLOC_027178	XLOC_027178	Srrm1	4:135320483-135353321	Control_PFC	Experimental_PFC	OK	35.6353	21.6506	-0.718901	-2.51449	5e-05	0.000434753	yes
XLOC_027194	XLOC_027194	Rpl11	4:136028264-136053428	Control_PFC	Experimental_PFC	OK	143.977	190.941	0.407293	1.87136	0.001	0.00637663	yes
XLOC_027201	XLOC_027201	Ephb2	4:136647538-136835988	Control_PFC	Experimental_PFC	OK	5.3145	7.17872	0.433791	1.63888	0.00675	0.032566	yes
XLOC_027203	XLOC_027203	C1qc	4:136889803-136893065	Control_PFC	Experimental_PFC	OK	16.6391	22.8574	0.458085	2.0696	0.0007	0.00467802	yes
XLOC_027204	XLOC_027204	C1qa	4:136895916-136898803	Control_PFC	Experimental_PFC	OK	32.5947	42.0735	0.368273	1.73745	0.00275	0.01525	yes
XLOC_027205	XLOC_027205	Epha8	4:136929418-136956816	Control_PFC	Experimental_PFC	OK	0.73015	1.3682	0.906019	2.61344	5e-05	0.000434753	yes
XLOC_027221	XLOC_027221	Pink1	4:138313408-138326307	Control_PFC	Experimental_PFC	OK	100.014	126.477	0.338673	1.45086	0.0106	0.0474961	yes
XLOC_027232	XLOC_027232	Htr6	4:139061107-139075570	Control_PFC	Experimental_PFC	OK	1.58293	2.54508	0.685113	1.61937	0.0068	0.0327479	yes
XLOC_027246	XLOC_027246	Arhgef10l	4:140514484-140666012	Control_PFC	Experimental_PFC	OK	12.7805	20.9418	0.712447	1.69271	0.00595	0.0293067	yes
XLOC_027273	XLOC_027273	Kazn	4:142102389-142239401	Control_PFC	Experimental_PFC	OK	21.9191	31.9844	0.545179	1.91808	0.00095	0.00609393	yes
XLOC_027341	XLOC_027341	Gm16211	4:147668517-147670854	Control_PFC	Experimental_PFC	OK	7.85542	5.21134	-0.592034	-2.1958	0.00025	0.00188079	yes
XLOC_027357	XLOC_027357	Fbxo6	4:148145715-148152140	Control_PFC	Experimental_PFC	OK	7.80938	11.1328	0.511543	1.73553	0.00205	0.0118768	yes
XLOC_027359	XLOC_027359	Fbxo44	4:148152799-148160482	Control_PFC	Experimental_PFC	OK	49.6736	68.0949	0.455069	2.05066	0.0003	0.00221024	yes
XLOC_027360	XLOC_027360	Ptchd2	4:148240263-148287965	Control_PFC	Experimental_PFC	OK	11.6634	7.93313	-0.556023	-1.87174	0.00355	0.0189337	yes
XLOC_027384	XLOC_027384	Slc25a33	4:149744035-149774277	Control_PFC	Experimental_PFC	OK	5.82406	9.35607	0.683877	2.68843	5e-05	0.000434753	yes
XLOC_027389	XLOC_027389	H6pd	4:149979474-150009023	Control_PFC	Experimental_PFC	OK	5.49642	10.8381	0.979544	2.07184	0.0003	0.00221024	yes
XLOC_027397	XLOC_027397	Park7	4:150897132-150914437	Control_PFC	Experimental_PFC	OK	63.2959	82.0579	0.374531	1.74839	0.00225	0.0128619	yes
XLOC_027431	XLOC_027431	Fam213b	4:154856199-154899135	Control_PFC	Experimental_PFC	OK	42.7041	60.5084	0.50276	2.26065	0.00015	0.00118995	yes
XLOC_027435	XLOC_027435	Rer1	4:155074109-155086382	Control_PFC	Experimental_PFC	OK	22.1681	28.4417	0.359523	1.69526	0.0033	0.0177984	yes
XLOC_027438	XLOC_027438	Gabrd	4:155384979-155398112	Control_PFC	Experimental_PFC	OK	25.1934	43.9752	0.80364	3.63895	5e-05	0.000434753	yes
XLOC_027454	XLOC_027454	B3galt6	4:155989465-155992649	Control_PFC	Experimental_PFC	OK	2.32358	3.8431	0.725922	2.66372	5e-05	0.000434753	yes
XLOC_027463	XLOC_027463	Plekhn1	4:156221455-156228542	Control_PFC	Experimental_PFC	OK	0.729933	0.374182	-0.964022	-1.69685	0.0047	0.0239971	yes
XLOC_027473	XLOC_027473	Gm15772	5:3236430-3236868	Control_PFC	Experimental_PFC	OK	290.35	380.151	0.388781	1.82885	0.00115	0.00719815	yes
XLOC_027504	XLOC_027504	4921511H03Rik	5:6769009-7344756	Control_PFC	Experimental_PFC	OK	4.16177	0.896191	-2.21532	-2.37708	5e-05	0.000434753	yes
XLOC_027549	XLOC_027549	RP23-299O17.4	5:11460423-11464271	Control_PFC	Experimental_PFC	OK	19.1428	12.6609	-0.59642	-2.79856	5e-05	0.000434753	yes
XLOC_027563	XLOC_027563	Sema3d	5:12383384-12588948	Control_PFC	Experimental_PFC	OK	2.99051	1.34207	-1.15594	-2.85315	5e-05	0.000434753	yes
XLOC_027590	XLOC_027590	RP23-239L21.4	5:14965934-14969793	Control_PFC	Experimental_PFC	OK	59.935	39.3569	-0.606783	-2.71548	5e-05	0.000434753	yes
XLOC_027626	XLOC_027626	Gsap	5:21186254-21424677	Control_PFC	Experimental_PFC	OK	3.10367	1.52553	-1.02466	-2.29851	5e-05	0.000434753	yes
XLOC_027643	XLOC_027643	Lhfpl3	5:22550431-23275597	Control_PFC	Experimental_PFC	OK	7.62603	3.31837	-1.20046	-3.96554	5e-05	0.000434753	yes
XLOC_027644	XLOC_027644	Gm21846	5:22550431-23275597	Control_PFC	Experimental_PFC	OK	1.35921	0.42248	-1.68581	-1.96201	0.00205	0.0118768	yes
XLOC_027651	XLOC_027651	2700038G22Rik	5:23850596-23855038	Control_PFC	Experimental_PFC	OK	2.15339	0.625937	-1.78252	-2.39315	0.0002	0.00154481	yes
XLOC_027686	XLOC_027686	Actr3b	5:25759996-25850688	Control_PFC	Experimental_PFC	OK	35.1482	49.5215	0.494602	2.18441	0.0002	0.00154481	yes
XLOC_027728	XLOC_027728	Cenpa	5:30666776-30674830	Control_PFC	Experimental_PFC	OK	0.872817	2.5804	1.56385	1.69362	5e-05	0.000434753	yes
XLOC_027729	XLOC_027729	Dpysl5	5:30711563-30799375	Control_PFC	Experimental_PFC	OK	6.89019	4.24855	-0.697575	-1.77411	0.0023	0.0130957	yes
XLOC_027781	XLOC_027781	Maea	5:33335508-33373296	Control_PFC	Experimental_PFC	OK	30.5054	39.082	0.35744	1.49917	0.00575	0.0284944	yes
XLOC_027791	XLOC_027791	Gm1673	5:33983432-33985013	Control_PFC	Experimental_PFC	OK	19.8677	39.0138	0.973559	3.60113	5e-05	0.000434753	yes
XLOC_027801	XLOC_027801	RP23-429E19.5	5:34487313-34489722	Control_PFC	Experimental_PFC	OK	1.79489	0.932542	-0.944652	-2.40938	0.0001	0.000825347	yes
XLOC_027813	XLOC_027813	Dok7	5:35056765-35087839	Control_PFC	Experimental_PFC	OK	4.75723	6.29864	0.40492	1.47727	0.00865	0.0401111	yes
XLOC_027814	XLOC_027814	Adra2c	5:35278318-35281763	Control_PFC	Experimental_PFC	OK	5.23023	9.41712	0.848412	3.84941	5e-05	0.000434753	yes
XLOC_027821	XLOC_027821	Ablim2	5:35757879-35884973	Control_PFC	Experimental_PFC	OK	40.1397	62.2293	0.632564	2.03917	0.0002	0.00154481	yes
XLOC_027835	XLOC_027835	Gm1043	5:37182076-37194326	Control_PFC	Experimental_PFC	OK	7.93492	15.1889	0.936727	2.86532	5e-05	0.000434753	yes
XLOC_027862	XLOC_027862	RP24-560A18.3	5:43059254-43060883	Control_PFC	Experimental_PFC	OK	11.676	7.86875	-0.569341	-2.36643	5e-05	0.000434753	yes
XLOC_027871	XLOC_027871	Cc2d2a	5:43662345-43740972	Control_PFC	Experimental_PFC	OK	6.83812	5.08762	-0.426609	-1.61609	0.00455	0.0233511	yes
XLOC_027882	XLOC_027882	RP24-230J14.4	5:44136619-44136921	Control_PFC	Experimental_PFC	OK	20.6696	13.3764	-0.62782	-1.54378	0.00895	0.0412846	yes
XLOC_027895	XLOC_027895	Med28	5:45520228-45529276	Control_PFC	Experimental_PFC	OK	33.7487	47.8316	0.503132	1.91288	0.00065	0.00438462	yes
XLOC_027950	XLOC_027950	Smim20	5:53267105-53278539	Control_PFC	Experimental_PFC	OK	12.1159	15.8226	0.385083	1.50608	0.0084	0.0391051	yes
XLOC_027955	XLOC_027955	RP24-196M24.2	5:53905163-53909218	Control_PFC	Experimental_PFC	OK	2.37419	1.40907	-0.752691	-2.57076	5e-05	0.000434753	yes
XLOC_028005	XLOC_028005	RP24-447I18.1	5:62428718-62429077	Control_PFC	Experimental_PFC	OK	323.804	179.78	-0.848887	-3.96948	5e-05	0.000434753	yes
XLOC_028030	XLOC_028030	Klhl5	5:65131230-65168140	Control_PFC	Experimental_PFC	OK	11.2454	8.79512	-0.354558	-1.67955	0.00325	0.0175643	yes
XLOC_028042	XLOC_028042	N4bp2	5:65760990-65830108	Control_PFC	Experimental_PFC	OK	3.4223	1.80416	-0.923635	-1.4761	0.00735	0.0349866	yes
XLOC_028056	XLOC_028056	Nsun7	5:66259896-66298026	Control_PFC	Experimental_PFC	OK	2.03418	1.37026	-0.569997	-1.64298	0.00445	0.0229075	yes
XLOC_028058	XLOC_028058	Uchl1	5:66626494-66687234	Control_PFC	Experimental_PFC	OK	248.967	347.39	0.480599	1.97774	0.00065	0.00438462	yes
XLOC_028073	XLOC_028073	Shisa3	5:67607881-67909013	Control_PFC	Experimental_PFC	OK	4.8744	0.39305	-3.63244	-0.886386	0.0083	0.0387242	yes
XLOC_028105	XLOC_028105	Dcun1d4	5:73480999-73560794	Control_PFC	Experimental_PFC	OK	39.8801	68.1991	0.774084	1.88355	0.00115	0.00719815	yes
XLOC_028112	XLOC_028112	Dancr,Snora26	5:74092136-74095406	Control_PFC	Experimental_PFC	OK	7.2605	11.7257	0.691537	2.14505	0.00055	0.00378661	yes
XLOC_028113	XLOC_028113	Rasl11b	5:74195285-74199481	Control_PFC	Experimental_PFC	OK	20.8288	15.8225	-0.396601	-1.77352	0.0013	0.0080057	yes
XLOC_028149	XLOC_028149	Rest	5:77265490-77286432	Control_PFC	Experimental_PFC	OK	1.50174	1.14533	-0.390869	-1.43371	0.0112	0.0497926	yes
XLOC_028182	XLOC_028182	Ythdc1	5:86705185-86836659	Control_PFC	Experimental_PFC	OK	20.8867	14.6616	-0.510545	-2.13137	0.0001	0.000825347	yes
XLOC_028219	XLOC_028219	Dck	5:88764995-88783281	Control_PFC	Experimental_PFC	OK	5.13339	6.57807	0.357753	1.46155	0.01045	0.0469485	yes
XLOC_028221	XLOC_028221	Slc4a4	5:88886817-89239653	Control_PFC	Experimental_PFC	OK	44.2651	30.6919	-0.528311	-1.99655	0.00015	0.00118995	yes
XLOC_028334	XLOC_028334	Fgf5	5:98254183-98277030	Control_PFC	Experimental_PFC	OK	1.04212	1.93451	0.892453	1.58654	0.00495	0.0250703	yes
XLOC_028351	XLOC_028351	Enoph1	5:100039984-100068760	Control_PFC	Experimental_PFC	OK	19.8554	25.1918	0.34342	1.5184	0.0082	0.0383333	yes
XLOC_028363	XLOC_028363	Agpat9	5:100840796-100899102	Control_PFC	Experimental_PFC	OK	1.26012	2.39726	0.927825	1.44609	0.00195	0.0113736	yes
XLOC_028380	XLOC_028380	Ptpn13	5:103425191-103598303	Control_PFC	Experimental_PFC	OK	4.52796	3.37054	-0.425883	-1.86953	0.00105	0.00665123	yes
XLOC_028396	XLOC_028396	Spp1	5:104435117-104441050	Control_PFC	Experimental_PFC	OK	8.18416	2.47274	-1.72673	-4.49517	5e-05	0.000434753	yes
XLOC_028398	XLOC_028398	BC005561	5:104508351-104522611	Control_PFC	Experimental_PFC	OK	10.0436	7.38051	-0.444478	-2.07768	0.0002	0.00154481	yes
XLOC_028429	XLOC_028429	Ephx4	5:107392730-107435039	Control_PFC	Experimental_PFC	OK	24.6003	35.6607	0.535661	2.31978	5e-05	0.000434753	yes
XLOC_028486	XLOC_028486	Galnt9	5:110544354-110621380	Control_PFC	Experimental_PFC	OK	23.7019	35.9349	0.600383	2.79629	5e-05	0.000434753	yes
XLOC_028494	XLOC_028494	Ttc28	5:110879802-111289780	Control_PFC	Experimental_PFC	OK	4.65415	2.74289	-0.762821	-1.49291	0.0032	0.0173398	yes
XLOC_028502	XLOC_028502	Mn1	5:111417361-111457033	Control_PFC	Experimental_PFC	OK	11.3745	16.1988	0.510085	2.34209	5e-05	0.000434753	yes
XLOC_028512	XLOC_028512	Crybb1	5:112255814-112269585	Control_PFC	Experimental_PFC	OK	2.91294	4.66665	0.679912	1.67457	0.00355	0.0189337	yes
XLOC_028531	XLOC_028531	Wscd2	5:113490332-113589725	Control_PFC	Experimental_PFC	OK	12.9875	17.3931	0.421391	1.9135	0.0007	0.00467802	yes
XLOC_028557	XLOC_028557	Oasl2	5:114896935-114912234	Control_PFC	Experimental_PFC	OK	1.48638	0.617077	-1.26828	-1.24017	0.00395	0.0207122	yes
XLOC_028570	XLOC_028570	Triap1	5:115341224-115343569	Control_PFC	Experimental_PFC	OK	6.68795	10.5416	0.656459	2.3026	0.00015	0.00118995	yes
XLOC_028575	XLOC_028575	Gm24265	5:115489458-115489599	Control_PFC	Experimental_PFC	OK	14946.3	40558.1	1.4402	5.70619	5e-05	0.000434753	yes
XLOC_028576	XLOC_028576	Gm24407	5:115490253-115490394	Control_PFC	Experimental_PFC	OK	19740.5	57489	1.54213	5.55628	5e-05	0.000434753	yes
XLOC_028579	XLOC_028579	Rplp0	5:115559466-115563727	Control_PFC	Experimental_PFC	OK	48.1877	63.8098	0.405112	1.90627	0.0009	0.00581278	yes
XLOC_028592	XLOC_028592	Srrm4os	5:116438719-116591817	Control_PFC	Experimental_PFC	OK	5.44529	2.38703	-1.18979	-1.54856	0.003	0.0164048	yes
XLOC_028604	XLOC_028604	Ksr2	5:117413999-117775003	Control_PFC	Experimental_PFC	OK	8.18472	11.2962	0.46483	1.51509	0.0097	0.0441209	yes
XLOC_028609	XLOC_028609	Tesc	5:118027742-118061878	Control_PFC	Experimental_PFC	OK	23.4678	39.1149	0.737039	3.38994	5e-05	0.000434753	yes
XLOC_028615	XLOC_028615	Med13l	5:118560678-118765438	Control_PFC	Experimental_PFC	OK	25.8278	78.5689	1.60503	2.85237	5e-05	0.000434753	yes
XLOC_028649	XLOC_028649	Rpl6	5:121204480-121209241	Control_PFC	Experimental_PFC	OK	120.068	162.679	0.438179	1.92464	0.00065	0.00438462	yes
XLOC_028673	XLOC_028673	Vps29	5:122354368-122382902	Control_PFC	Experimental_PFC	OK	45.4228	65.8642	0.536079	1.55185	0.00815	0.0381515	yes
XLOC_028716	XLOC_028716	Ogfod2	5:124112296-124115483	Control_PFC	Experimental_PFC	OK	12.577	18.9135	0.588631	2.19943	0.00015	0.00118995	yes
XLOC_028760	XLOC_028760	Gm17132	5:127781629-128433077	Control_PFC	Experimental_PFC	OK	122.767	69.203	-0.827018	-1.59463	0.0065	0.0315788	yes
XLOC_028761	XLOC_028761	Gm17131	5:127781629-128433077	Control_PFC	Experimental_PFC	OK	67.3766	45.1458	-0.577657	-1.63502	0.00525	0.0263478	yes
XLOC_028772	XLOC_028772	Sfswap	5:129501220-129571384	Control_PFC	Experimental_PFC	OK	30.7764	22.9243	-0.424947	-1.50039	0.00585	0.0289118	yes
XLOC_028790	XLOC_028790	Rabgef1	5:130171797-130214342	Control_PFC	Experimental_PFC	OK	16.4644	26.5812	0.691051	2.31348	5e-05	0.000434753	yes
XLOC_028795	XLOC_028795	Caln1	5:130369454-130847412	Control_PFC	Experimental_PFC	OK	30.3854	45.8832	0.594587	1.30365	0.00455	0.0233511	yes
XLOC_028827	XLOC_028827	Abhd11	5:135007092-135013253	Control_PFC	Experimental_PFC	OK	11.2742	15.5019	0.459413	1.68205	0.00215	0.0123726	yes
XLOC_028847	XLOC_028847	Rasa4	5:136083915-136111860	Control_PFC	Experimental_PFC	OK	4.46889	1.54392	-1.53332	-1.68908	5e-05	0.000434753	yes
XLOC_028855	XLOC_028855	Fis1	5:136953274-136966234	Control_PFC	Experimental_PFC	OK	83.4796	132.43	0.665734	3.10352	5e-05	0.000434753	yes
XLOC_028860	XLOC_028860	Vgf	5:137026391-137033351	Control_PFC	Experimental_PFC	OK	69.5228	104.277	0.584865	1.9779	0.00055	0.00378661	yes
XLOC_028880	XLOC_028880	Ppp1r35	5:137778848-137780110	Control_PFC	Experimental_PFC	OK	6.04472	11.6569	0.947434	2.16745	0.0001	0.000825347	yes
XLOC_028899	XLOC_028899	Lamtor4	5:138255481-138259398	Control_PFC	Experimental_PFC	OK	23.9571	33.085	0.465724	2.09891	0.00035	0.00253699	yes
XLOC_028911	XLOC_028911	A430033K04Rik	5:138622858-138652414	Control_PFC	Experimental_PFC	OK	6.31744	4.68124	-0.432449	-1.70539	0.0033	0.0177984	yes
XLOC_028913	XLOC_028913	Fam20c	5:138754513-138810077	Control_PFC	Experimental_PFC	OK	21.4751	13.4536	-0.674671	-2.74409	5e-05	0.000434753	yes
XLOC_028918	XLOC_028918	Get4	5:139252323-139270051	Control_PFC	Experimental_PFC	OK	18.4442	24.0748	0.384351	1.56657	0.0064	0.0311599	yes
XLOC_028952	XLOC_028952	Slc29a4	5:142692511-142722490	Control_PFC	Experimental_PFC	OK	2.13808	1.00199	-1.09345	-1.35336	0.009	0.0414631	yes
XLOC_028984	XLOC_028984	Nptx2	5:144545901-144557478	Control_PFC	Experimental_PFC	OK	12.986	17.4729	0.428164	2.02841	0.0004	0.00285605	yes
XLOC_028990	XLOC_028990	Arpc1a	5:144983518-145108761	Control_PFC	Experimental_PFC	OK	54.4011	74.9279	0.461866	2.081	0.00025	0.00188079	yes
XLOC_028993	XLOC_028993	Cpsf4	5:145167212-145182041	Control_PFC	Experimental_PFC	OK	9.95455	7.02429	-0.503003	-1.84427	0.0008	0.00525136	yes
XLOC_029023	XLOC_029023	Polr1d	5:147077049-147111597	Control_PFC	Experimental_PFC	OK	18.2914	22.8202	0.319145	1.43179	0.01055	0.0472959	yes
XLOC_029031	XLOC_029031	RP24-544J6.5	5:147427737-147428733	Control_PFC	Experimental_PFC	OK	2.26958	4.407	0.95737	2.36856	5e-05	0.000434753	yes
XLOC_029056	XLOC_029056	Medag	5:149367635-149431723	Control_PFC	Experimental_PFC	OK	5.27841	7.04759	0.417027	1.54666	0.003	0.0164048	yes
XLOC_029070	XLOC_029070	Brca2	5:150522629-150570329	Control_PFC	Experimental_PFC	OK	10.2389	5.8285	-0.81287	-2.00208	0.00045	0.00317388	yes
XLOC_029076	XLOC_029076	Kl	5:150952606-150993817	Control_PFC	Experimental_PFC	OK	0.654495	0.362075	-0.854093	-2.06357	0.0007	0.00467802	yes
XLOC_029091	XLOC_029091	Ankib1	5:3689999-3802925	Control_PFC	Experimental_PFC	OK	42.8647	63.601	0.56926	2.04612	0.00055	0.00378661	yes
XLOC_029107	XLOC_029107	1700015F17Rik	5:5437826-5479143	Control_PFC	Experimental_PFC	OK	0.392135	2.13873	2.44733	1.76478	0.00055	0.00378661	yes
XLOC_029115	XLOC_029115	RP24-323L24.1	5:6311310-6313991	Control_PFC	Experimental_PFC	OK	2.19215	1.1397	-0.943694	-2.67088	5e-05	0.000434753	yes
XLOC_029119	XLOC_029119	Zfp804b	5:6769009-7344756	Control_PFC	Experimental_PFC	OK	1.22638	0.529895	-1.21062	-2.47174	5e-05	0.000434753	yes
XLOC_029122	XLOC_029122	RP24-72E12.2	5:6769009-7344756	Control_PFC	Experimental_PFC	OK	1.77427	0.488975	-1.85939	-2.12859	0.0025	0.0140585	yes
XLOC_029130	XLOC_029130	Rundc3b	5:8490333-8622952	Control_PFC	Experimental_PFC	OK	8.90029	13.0265	0.549525	2.28741	5e-05	0.000434753	yes
XLOC_029139	XLOC_029139	Grm3	5:9485540-9725170	Control_PFC	Experimental_PFC	OK	42.0848	54.3272	0.368375	1.6729	0.0032	0.0173398	yes
XLOC_029203	XLOC_029203	Ptpn12	5:20986644-21055911	Control_PFC	Experimental_PFC	OK	13.5672	9.19911	-0.560556	-1.859	0.00105	0.00665123	yes
XLOC_029231	XLOC_029231	RP23-211E12.6	5:22550431-23275597	Control_PFC	Experimental_PFC	OK	0.763222	0.291821	-1.38702	-1.78644	0.0032	0.0173398	yes
XLOC_029248	XLOC_029248	Tomm7	5:23838943-23844161	Control_PFC	Experimental_PFC	OK	28.7681	37.9508	0.399658	1.87263	0.00115	0.00719815	yes
XLOC_029249	XLOC_029249	Fam126a	5:23915275-24030690	Control_PFC	Experimental_PFC	OK	7.64519	4.79622	-0.672656	-2.33557	5e-05	0.000434753	yes
XLOC_029256	XLOC_029256	Cdk5	5:24418240-24423530	Control_PFC	Experimental_PFC	OK	36.9163	50.8156	0.461013	1.66567	0.0025	0.0140585	yes
XLOC_029320	XLOC_029320	Tyms	5:30058201-30073617	Control_PFC	Experimental_PFC	OK	6.20514	4.3159	-0.523802	-1.8579	0.0006	0.00409089	yes
XLOC_029350	XLOC_029350	RP24-80F7.3	5:31560811-31569072	Control_PFC	Experimental_PFC	OK	0.921212	0.626848	-0.555418	-1.68001	0.00405	0.0211667	yes
XLOC_029380	XLOC_029380	RP24-294K15.4	5:33947025-33948990	Control_PFC	Experimental_PFC	OK	1.31937	0.498876	-1.40309	-2.26197	0.00045	0.00317388	yes
XLOC_029381	XLOC_029381	RP24-294K15.7	5:33990509-33993062	Control_PFC	Experimental_PFC	OK	5.87698	4.21104	-0.480901	-1.91558	0.00105	0.00665123	yes
XLOC_029411	XLOC_029411	Bloc1s4	5:36747377-36750437	Control_PFC	Experimental_PFC	OK	5.02252	7.43138	0.56522	1.91123	0.0005	0.00348019	yes
XLOC_029441	XLOC_029441	Hs3st1	5:39613934-39755475	Control_PFC	Experimental_PFC	OK	10.6787	7.17955	-0.572768	-2.04112	0.0003	0.00221024	yes
XLOC_029445	XLOC_029445	Rab28	5:41624975-41708157	Control_PFC	Experimental_PFC	OK	28.7262	38.4498	0.420609	1.7882	0.00165	0.00984883	yes
XLOC_029486	XLOC_029486	RP23-33C9.1	5:45009170-45424402	Control_PFC	Experimental_PFC	OK	22.8815	13.5845	-0.752227	-3.43039	5e-05	0.000434753	yes
XLOC_029528	XLOC_029528	Ppargc1a	5:51454249-51567726	Control_PFC	Experimental_PFC	OK	13.6778	8.63844	-0.662992	-2.5982	5e-05	0.000434753	yes
XLOC_029532	XLOC_029532	RP24-296L6.1	5:51855219-51858775	Control_PFC	Experimental_PFC	OK	7.07851	2.71035	-1.38496	-5.5991	5e-05	0.000434753	yes
XLOC_029533	XLOC_029533	RP24-296L6.2	5:51875418-51879602	Control_PFC	Experimental_PFC	OK	6.05834	2.46225	-1.29895	-5.34451	5e-05	0.000434753	yes
XLOC_029534	XLOC_029534	RP24-296L6.3	5:51891985-51893214	Control_PFC	Experimental_PFC	OK	5.57753	2.05325	-1.44172	-3.85924	5e-05	0.000434753	yes
XLOC_029535	XLOC_029535	RP24-296L6.4	5:51907121-51910931	Control_PFC	Experimental_PFC	OK	6.63831	2.56354	-1.37268	-5.5926	5e-05	0.000434753	yes
XLOC_029536	XLOC_029536	RP24-299M10.1	5:52079887-52082332	Control_PFC	Experimental_PFC	OK	4.45417	1.62004	-1.45912	-4.61221	5e-05	0.000434753	yes
XLOC_029538	XLOC_029538	RP24-309H3.1	5:52139584-52142573	Control_PFC	Experimental_PFC	OK	0.720816	0.363475	-0.987774	-1.95776	0.0017	0.0100963	yes
XLOC_029553	XLOC_029553	Sel1l3	5:53107082-53213927	Control_PFC	Experimental_PFC	OK	17.7822	24.4421	0.458935	2.03664	0.0002	0.00154481	yes
XLOC_029573	XLOC_029573	RP23-324H16.2	5:59569701-59574242	Control_PFC	Experimental_PFC	OK	11.469	8.15846	-0.491372	-2.1122	0.00015	0.00118995	yes
XLOC_029574	XLOC_029574	RP24-267O6.1	5:59953510-59956140	Control_PFC	Experimental_PFC	OK	13.179	6.90214	-0.933125	-4.22462	5e-05	0.000434753	yes
XLOC_029602	XLOC_029602	RP24-448C16.5	5:64564176-64564819	Control_PFC	Experimental_PFC	OK	18.2483	11.4584	-0.671353	-2.27637	0.0002	0.00154481	yes
XLOC_029613	XLOC_029613	Rpl9	5:65388363-65391444	Control_PFC	Experimental_PFC	OK	278.395	472.702	0.7638	3.30472	5e-05	0.000434753	yes
XLOC_029649	XLOC_029649	RP23-213N8.1	5:67607217-67607826	Control_PFC	Experimental_PFC	OK	0.668033	0	#NAME?	#NAME?	5e-05	0.000434753	yes
XLOC_029663	XLOC_029663	Kctd8	5:69109284-69341679	Control_PFC	Experimental_PFC	OK	2.60433	4.95595	0.928248	2.80481	5e-05	0.000434753	yes
XLOC_029681	XLOC_029681	Gabrg1	5:70751046-70842617	Control_PFC	Experimental_PFC	OK	7.42546	4.68925	-0.663122	-2.34917	5e-05	0.000434753	yes
XLOC_029693	XLOC_029693	Nfxl1	5:72513300-72559684	Control_PFC	Experimental_PFC	OK	6.61412	4.02182	-0.717701	-1.51618	0.00845	0.0393035	yes
XLOC_029700	XLOC_029700	Tec	5:72755715-72868483	Control_PFC	Experimental_PFC	OK	1.53754	0.691191	-1.15347	-1.44639	0.0004	0.00285605	yes
XLOC_029730	XLOC_029730	RP23-382I10.2	5:74985855-74989066	Control_PFC	Experimental_PFC	OK	3.35676	1.94956	-0.783925	-2.7299	5e-05	0.000434753	yes
XLOC_029742	XLOC_029742	Kdr	5:75932826-75978458	Control_PFC	Experimental_PFC	OK	2.93124	2.20381	-0.411513	-1.68778	0.00315	0.0171177	yes
XLOC_029769	XLOC_029769	RP23-393A24.1	5:82119678-82121362	Control_PFC	Experimental_PFC	OK	3.37876	2.37148	-0.510705	-1.49444	0.01	0.0452649	yes
XLOC_029778	XLOC_029778	Epha5	5:84054760-84417382	Control_PFC	Experimental_PFC	OK	38.1986	24.9429	-0.61489	-2.4528	5e-05	0.000434753	yes
XLOC_029838	XLOC_029838	Adamts3	5:89677086-89883334	Control_PFC	Experimental_PFC	OK	8.9672	12.5473	0.484652	1.58192	0.00685	0.0329618	yes
XLOC_029877	XLOC_029877	Sowahb	5:93041122-93045022	Control_PFC	Experimental_PFC	OK	6.15671	9.36627	0.605314	2.8697	5e-05	0.000434753	yes
XLOC_029917	XLOC_029917	Rasgef1b	5:99217425-99252927	Control_PFC	Experimental_PFC	OK	15.5466	20.1455	0.373856	1.55036	0.0065	0.0315788	yes
XLOC_029925	XLOC_029925	Hnrnpdl	5:100033576-100039664	Control_PFC	Experimental_PFC	OK	46.5071	34.342	-0.437477	-1.88828	0.00155	0.00932883	yes
XLOC_029939	XLOC_029939	Helq	5:100762144-100798598	Control_PFC	Experimental_PFC	OK	10.2375	6.30677	-0.698897	-1.69583	0.00205	0.0118768	yes
XLOC_029962	XLOC_029962	Hsd17b11	5:103989761-104021919	Control_PFC	Experimental_PFC	OK	9.48121	7.07941	-0.421442	-1.75377	0.00225	0.0128619	yes
XLOC_029973	XLOC_029973	Gbp10,Gbp6	5:105214906-105293698	Control_PFC	Experimental_PFC	OK	0.69104	0.249034	-1.47242	-1.62703	0.00075	0.00496726	yes
XLOC_030011	XLOC_030011	RP24-317M4.6	5:108366072-108366547	Control_PFC	Experimental_PFC	OK	27.6277	41.3884	0.583108	2.26362	0.00015	0.00118995	yes
XLOC_030012	XLOC_030012	Atp5k	5:108433243-108434448	Control_PFC	Experimental_PFC	OK	202.181	260.914	0.367923	1.72218	0.0025	0.0140585	yes
XLOC_030038	XLOC_030038	RP23-396K22.3	5:109769406-109796298	Control_PFC	Experimental_PFC	OK	2.40571	0.92053	-1.38593	-2.0404	0.0021	0.0121275	yes
XLOC_030074	XLOC_030074	Asphd2	5:112384353-112394866	Control_PFC	Experimental_PFC	OK	36.2557	53.8665	0.571179	1.87018	0.00095	0.00609393	yes
XLOC_030126	XLOC_030126	Cox6a1	5:115345641-115348981	Control_PFC	Experimental_PFC	OK	333.041	511.186	0.61815	2.78785	5e-05	0.000434753	yes
XLOC_030145	XLOC_030145	Srrm4	5:116438719-116591817	Control_PFC	Experimental_PFC	OK	7.32939	4.72083	-0.634653	-2.00024	0.0006	0.00409089	yes
XLOC_030152	XLOC_030152	Pebp1	5:117282653-117287625	Control_PFC	Experimental_PFC	OK	182.36	283.92	0.638695	2.74391	5e-05	0.000434753	yes
XLOC_030180	XLOC_030180	Sdsl	5:120458185-120472810	Control_PFC	Experimental_PFC	OK	0.830942	1.5909	0.937027	1.37352	0.00645	0.0313746	yes
XLOC_030182	XLOC_030182	Plbd2	5:120476525-120503625	Control_PFC	Experimental_PFC	OK	11.4156	16.7153	0.550163	2.10788	0.00035	0.00253699	yes
XLOC_030183	XLOC_030183	Tpcn1	5:120534152-120588673	Control_PFC	Experimental_PFC	OK	6.89148	5.17826	-0.412346	-1.7408	0.00245	0.0138233	yes
XLOC_030252	XLOC_030252	Abcb9	5:124032360-124095798	Control_PFC	Experimental_PFC	OK	15.1099	20.6486	0.450545	1.82566	0.00165	0.00984883	yes
XLOC_030260	XLOC_030260	Rilpl2	5:124463264-124478366	Control_PFC	Experimental_PFC	OK	6.27488	8.60726	0.455967	1.67725	0.00395	0.0207122	yes
XLOC_030300	XLOC_030300	Phkg1	5:129846985-129903623	Control_PFC	Experimental_PFC	OK	5.78895	12.011	1.05299	1.52815	0.0056	0.027847	yes
XLOC_030302	XLOC_030302	Chchd2	5:129846985-129903623	Control_PFC	Experimental_PFC	OK	86.0354	137.218	0.673467	2.75057	5e-05	0.000434753	yes
XLOC_030311	XLOC_030311	Wbscr17	5:130872081-131308497	Control_PFC	Experimental_PFC	OK	8.13164	11.3036	0.47516	1.84778	0.00105	0.00665123	yes
XLOC_030329	XLOC_030329	RP24-95O4.1	5:131437332-132543344	Control_PFC	Experimental_PFC	OK	4.10064	1.41261	-1.53749	-1.8409	0.0016	0.00958802	yes
XLOC_030331	XLOC_030331	RP23-378O9.1	5:131437332-132543344	Control_PFC	Experimental_PFC	OK	4.89159	1.58765	-1.62341	-2.16725	0.0001	0.000825347	yes
XLOC_030345	XLOC_030345	Wbscr16	5:134148053-134177709	Control_PFC	Experimental_PFC	OK	4.1089	7.40463	0.849675	2.19484	5e-05	0.000434753	yes
XLOC_030358	XLOC_030358	Eln	5:134702592-134822967	Control_PFC	Experimental_PFC	OK	0.923107	0.542929	-0.765735	-1.59037	0.00395	0.0207122	yes
XLOC_030367	XLOC_030367	Gm25492	5:135052956-135065862	Control_PFC	Experimental_PFC	OK	819.806	2361.41	1.52629	2.76618	0.0001	0.000825347	yes
XLOC_030406	XLOC_030406	Ap1s1	5:137034992-137046135	Control_PFC	Experimental_PFC	OK	69.7988	101.042	0.533679	2.24568	0.0001	0.000825347	yes
XLOC_030408	XLOC_030408	Trim56	5:137105643-137116209	Control_PFC	Experimental_PFC	OK	2.13591	1.1454	-0.898997	-1.60464	0.00615	0.030137	yes
XLOC_030411	XLOC_030411	CAAA01154573.1	5:137186829-137189167	Control_PFC	Experimental_PFC	OK	1.05586	1.6206	0.618114	1.57399	0.00735	0.0349866	yes
XLOC_030423	XLOC_030423	Agfg2	5:137650462-137684726	Control_PFC	Experimental_PFC	OK	9.70562	13.2559	0.449745	1.81048	0.001	0.00637663	yes
XLOC_030449	XLOC_030449	Adap1	5:139271875-139325622	Control_PFC	Experimental_PFC	OK	65.185	99.7995	0.614492	2.54863	5e-05	0.000434753	yes
XLOC_030500	XLOC_030500	9530056K15Rik,RP23-372N19.4	5:143357337-143403748	Control_PFC	Experimental_PFC	OK	0.876377	0.289682	-1.59708	-1.44189	0.01055	0.0472959	yes
XLOC_030515	XLOC_030515	Smurf1	5:144876494-144965847	Control_PFC	Experimental_PFC	OK	9.79849	13.2482	0.435165	1.68927	0.00515	0.0259278	yes
XLOC_030522	XLOC_030522	Atp5j2	5:145183697-145192062	Control_PFC	Experimental_PFC	OK	111.625	159.691	0.516613	2.24664	5e-05	0.000434753	yes
XLOC_030526	XLOC_030526	RP24-127J3.1	5:145504096-145507054	Control_PFC	Experimental_PFC	OK	19.8927	14.9069	-0.416261	-1.94826	0.00095	0.00609393	yes
XLOC_030549	XLOC_030549	Lnx2	5:147016654-147076586	Control_PFC	Experimental_PFC	OK	1.56175	1.06548	-0.551657	-1.45125	0.0068	0.0327479	yes
XLOC_030631	XLOC_030631	Dync1i1	6:5725638-6028039	Control_PFC	Experimental_PFC	OK	55.1395	41.3526	-0.415107	-1.88549	0.00055	0.00378661	yes
XLOC_030640	XLOC_030640	Tac1	6:7554878-7565834	Control_PFC	Experimental_PFC	OK	21.8987	59.6064	1.44462	5.46813	5e-05	0.000434753	yes
XLOC_030645	XLOC_030645	Glcci1,Umad1	6:8259287-8597548	Control_PFC	Experimental_PFC	OK	62.6957	112.943	0.84916	2.31792	5e-05	0.000434753	yes
XLOC_030647	XLOC_030647	Nxph1	6:8948430-9249032	Control_PFC	Experimental_PFC	OK	17.0669	11.5785	-0.559755	-2.61402	5e-05	0.000434753	yes
XLOC_030664	XLOC_030664	Tes	6:17058805-17171833	Control_PFC	Experimental_PFC	OK	1.56616	0.702795	-1.15606	-1.47823	0.0037	0.019607	yes
XLOC_030690	XLOC_030690	RP24-230L6.3	6:18882710-18884196	Control_PFC	Experimental_PFC	OK	15.7911	9.68424	-0.705397	-3.03613	5e-05	0.000434753	yes
XLOC_030699	XLOC_030699	RP23-307L24.2	6:21215502-21729805	Control_PFC	Experimental_PFC	OK	8.891	3.90085	-1.18856	-2.17163	0.0001	0.000825347	yes
XLOC_030711	XLOC_030711	Ptprz1	6:22875501-23052916	Control_PFC	Experimental_PFC	OK	44.1285	30.6217	-0.527156	-2.11934	0.0002	0.00154481	yes
XLOC_030727	XLOC_030727	Arf5	6:28416090-28438622	Control_PFC	Experimental_PFC	OK	59.549	93.3287	0.648243	2.40724	5e-05	0.000434753	yes
XLOC_030742	XLOC_030742	Atp6v1f	6:29467717-29470512	Control_PFC	Experimental_PFC	OK	75.1729	97.3839	0.37347	1.74878	0.00255	0.0143003	yes
XLOC_030747	XLOC_030747	Smo	6:29735502-29761365	Control_PFC	Experimental_PFC	OK	4.00933	2.73399	-0.552352	-2.19018	0.00015	0.00118995	yes
XLOC_030801	XLOC_030801	Cald1	6:34598499-34775473	Control_PFC	Experimental_PFC	OK	6.6871	3.48829	-0.938862	-2.29129	5e-05	0.000434753	yes
XLOC_030813	XLOC_030813	Chrm2	6:36209619-36528414	Control_PFC	Experimental_PFC	OK	8.57085	4.96325	-0.788152	-2.6475	0.0001	0.000825347	yes
XLOC_030821	XLOC_030821	Gm15487	6:37806085-37806550	Control_PFC	Experimental_PFC	OK	127.707	182.314	0.513583	2.40182	5e-05	0.000434753	yes
XLOC_030830	XLOC_030830	1110001J03Rik	6:38533501-38539449	Control_PFC	Experimental_PFC	OK	28.2811	46.94	0.730979	2.89627	5e-05	0.000434753	yes
XLOC_030831	XLOC_030831	Luc7l2	6:38551333-38609470	Control_PFC	Experimental_PFC	OK	70.3978	44.7858	-0.652488	-2.23627	5e-05	0.000434753	yes
XLOC_030832	XLOC_030832	Clec2l	6:38663068-38680864	Control_PFC	Experimental_PFC	OK	20.1861	24.9418	0.305203	1.4535	0.0101	0.0456477	yes
XLOC_030840	XLOC_030840	Adck2,Ndufb2,RP23-366P9.8	6:39573872-39725463	Control_PFC	Experimental_PFC	OK	68.2835	151.825	1.1528	1.63356	0.0062	0.0303457	yes
XLOC_030917	XLOC_030917	Trbc2	6:41546729-41548352	Control_PFC	Experimental_PFC	OK	9.25062	15.563	0.750495	2.48303	5e-05	0.000434753	yes
XLOC_030929	XLOC_030929	Casp2	6:42264984-42282508	Control_PFC	Experimental_PFC	OK	9.71618	5.46794	-0.829391	-2.05729	0.0006	0.00409089	yes
XLOC_030965	XLOC_030965	Rny3	6:47781623-47781725	Control_PFC	Experimental_PFC	OK	3941150	6650200	0.754783	3.16663	5e-05	0.000434753	yes
XLOC_030994	XLOC_030994	Malsu1	6:49073794-49214954	Control_PFC	Experimental_PFC	OK	8.08602	13.1841	0.7053	1.83675	0.00325	0.0175643	yes
XLOC_030998	XLOC_030998	Npy	6:49822709-49829507	Control_PFC	Experimental_PFC	OK	71.2108	105.217	0.563196	2.66482	5e-05	0.000434753	yes
XLOC_030999	XLOC_030999	Mpp6	6:50110240-50263862	Control_PFC	Experimental_PFC	OK	27.4889	37.9588	0.465581	1.58467	0.0062	0.0303457	yes
XLOC_031033	XLOC_031033	Gars	6:55038000-55079504	Control_PFC	Experimental_PFC	OK	35.6045	45.5217	0.354497	1.67087	0.0029	0.015939	yes
XLOC_031035	XLOC_031035	Aqp1	6:55336431-55348555	Control_PFC	Experimental_PFC	OK	1.97125	0.183889	-3.42221	-5.62341	5e-05	0.000434753	yes
XLOC_031089	XLOC_031089	Ndnf	6:65671589-65706930	Control_PFC	Experimental_PFC	OK	10.7313	2.39497	-2.16375	-3.47618	5e-05	0.000434753	yes
XLOC_031224	XLOC_031224	0610030E20Rik	6:72347316-72353158	Control_PFC	Experimental_PFC	OK	3.29782	2.46897	-0.417604	-1.69356	0.0036	0.0191544	yes
XLOC_031260	XLOC_031260	Pcgf1	6:83077868-83080855	Control_PFC	Experimental_PFC	OK	6.12052	8.80697	0.524993	1.52096	0.0069	0.0331619	yes
XLOC_031262	XLOC_031262	Ccdc142,Mrpl53	6:83101616-83109939	Control_PFC	Experimental_PFC	OK	24.7847	38.6594	0.641372	2.44152	5e-05	0.000434753	yes
XLOC_031287	XLOC_031287	Emx1	6:85187437-85204462	Control_PFC	Experimental_PFC	OK	5.98531	9.43451	0.656521	2.46908	5e-05	0.000434753	yes
XLOC_031290	XLOC_031290	Cct7	6:85446809-85468477	Control_PFC	Experimental_PFC	OK	53.8152	73.1754	0.443347	1.97729	0.0004	0.00285605	yes
XLOC_031291	XLOC_031291	Alms1	6:85587530-85702753	Control_PFC	Experimental_PFC	OK	6.05749	3.82127	-0.664668	-2.52743	5e-05	0.000434753	yes
XLOC_031304	XLOC_031304	Tgfa	6:86195250-86275639	Control_PFC	Experimental_PFC	OK	9.95667	16.8078	0.755393	1.76024	0.00225	0.0128619	yes
XLOC_031309	XLOC_031309	Tia1	6:86404218-86433403	Control_PFC	Experimental_PFC	OK	51.2639	36.342	-0.496306	-1.60164	0.005	0.0252887	yes
XLOC_031339	XLOC_031339	Txnrd3	6:89643987-89675529	Control_PFC	Experimental_PFC	OK	1.64119	1.07035	-0.616654	-1.67993	0.00435	0.0224687	yes
XLOC_031366	XLOC_031366	Fbln2	6:91212454-91272540	Control_PFC	Experimental_PFC	OK	4.05898	1.49509	-1.44089	-2.16638	5e-05	0.000434753	yes
XLOC_031389	XLOC_031389	Arl6ip5	6:97210688-97233315	Control_PFC	Experimental_PFC	OK	49.2263	65.7173	0.416844	1.97013	0.0005	0.00348019	yes
XLOC_031394	XLOC_031394	Gpr27	6:99692678-99693818	Control_PFC	Experimental_PFC	OK	3.71724	5.61241	0.59439	1.76479	0.0031	0.0168727	yes
XLOC_031440	XLOC_031440	Cpne9	6:113282306-113305627	Control_PFC	Experimental_PFC	OK	19.3057	28.4909	0.561475	1.60496	0.00475	0.024221	yes
XLOC_031443	XLOC_031443	Arpc4	6:113378112-113390447	Control_PFC	Experimental_PFC	OK	31.7216	39.8582	0.329411	1.56013	0.00665	0.0321725	yes
XLOC_031451	XLOC_031451	Brk1	6:113604771-113616948	Control_PFC	Experimental_PFC	OK	80.8901	100.828	0.317865	1.50314	0.00785	0.0369682	yes
XLOC_031459	XLOC_031459	Slc6a11	6:114131240-114249886	Control_PFC	Experimental_PFC	OK	47.0481	19.2815	-1.28692	-5.75488	5e-05	0.000434753	yes
XLOC_031466	XLOC_031466	Pparg	6:115361220-115490401	Control_PFC	Experimental_PFC	OK	3.2817	2.21913	-0.564447	-1.67028	0.00415	0.0216013	yes
XLOC_031469	XLOC_031469	Cand2	6:115774537-115804893	Control_PFC	Experimental_PFC	OK	1.03039	0.586886	-0.812036	-2.22826	0.0002	0.00154481	yes
XLOC_031503	XLOC_031503	Rad52	6:119902697-119922828	Control_PFC	Experimental_PFC	OK	15.7638	21.3848	0.439974	1.52276	0.0075	0.0355876	yes
XLOC_031516	XLOC_031516	Tuba8	6:121210733-121226854	Control_PFC	Experimental_PFC	OK	6.58409	3.4288	-0.941279	-3.35348	5e-05	0.000434753	yes
XLOC_031518	XLOC_031518	Slc6a13	6:121300226-121337733	Control_PFC	Experimental_PFC	OK	5.31656	2.74004	-0.956295	-2.55416	5e-05	0.000434753	yes
XLOC_031567	XLOC_031567	Mlf2	6:124931387-124936138	Control_PFC	Experimental_PFC	OK	148.659	208.28	0.486513	2.13122	0.00025	0.00188079	yes
XLOC_031577	XLOC_031577	Mrpl51	6:125191800-125195583	Control_PFC	Experimental_PFC	OK	22.63	30.1641	0.414595	1.49129	0.0094	0.0429841	yes
XLOC_031579	XLOC_031579	Vamp1	6:125215550-125244543	Control_PFC	Experimental_PFC	OK	27.6043	40.9286	0.568217	2.54612	5e-05	0.000434753	yes
XLOC_031580	XLOC_031580	Scnn1a	6:125320658-125344943	Control_PFC	Experimental_PFC	OK	0.337687	0.880507	1.38265	1.35307	0.00135	0.00827436	yes
XLOC_031581	XLOC_031581	Tnfrsf1a	6:125349361-125362484	Control_PFC	Experimental_PFC	OK	2.81857	1.7012	-0.72841	-1.12409	0.0091	0.0418333	yes
XLOC_031632	XLOC_031632	Gabarapl1	6:129532093-129542331	Control_PFC	Experimental_PFC	OK	192.97	259.297	0.426227	1.69557	0.00385	0.0202747	yes
XLOC_031671	XLOC_031671	Loh12cr1	6:134639626-134711184	Control_PFC	Experimental_PFC	OK	9.12589	12.4553	0.44872	1.92181	0.0009	0.00581278	yes
XLOC_031676	XLOC_031676	Apold1	6:134982000-134986836	Control_PFC	Experimental_PFC	OK	3.10086	1.53592	-1.01357	-3.34738	5e-05	0.000434753	yes
XLOC_031696	XLOC_031696	Ptpro	6:137252298-137464629	Control_PFC	Experimental_PFC	OK	15.1965	3.62	-2.06968	-9.20338	5e-05	0.000434753	yes
XLOC_031699	XLOC_031699	Mgst1	6:138140315-138156755	Control_PFC	Experimental_PFC	OK	6.72748	4.15765	-0.694299	-1.43753	0.00735	0.0349866	yes
XLOC_031711	XLOC_031711	Pde3a	6:141238277-141505940	Control_PFC	Experimental_PFC	OK	0.835557	0.466262	-0.841599	-2.78319	5e-05	0.000434753	yes
XLOC_031743	XLOC_031743	Rassf8	6:145746747-145821079	Control_PFC	Experimental_PFC	OK	9.24535	5.42043	-0.770321	-2.3705	5e-05	0.000434753	yes
XLOC_031751	XLOC_031751	Ppfibp1	6:146888486-147032025	Control_PFC	Experimental_PFC	OK	13.3017	5.74418	-1.21144	-2.963	5e-05	0.000434753	yes
XLOC_031784	XLOC_031784	RP24-328P2.5	6:3333193-3346128	Control_PFC	Experimental_PFC	OK	1.48782	0.651151	-1.19213	-1.27148	0.0075	0.0355876	yes
XLOC_031785	XLOC_031785	RP23-253G12.9	6:3333193-3346128	Control_PFC	Experimental_PFC	OK	1.10551	0.577653	-0.936439	-1.62822	0.0054	0.0269987	yes
XLOC_031812	XLOC_031812	Dlx6os1	6:6820188-6869531	Control_PFC	Experimental_PFC	OK	21.1419	6.95271	-1.60446	-6.7665	5e-05	0.000434753	yes
XLOC_031816	XLOC_031816	Dlx5	6:6877804-6882085	Control_PFC	Experimental_PFC	OK	3.90311	1.24662	-1.6466	-3.97077	5e-05	0.000434753	yes
XLOC_031820	XLOC_031820	Asns	6:7675168-7693254	Control_PFC	Experimental_PFC	OK	26.5353	36.9158	0.476325	1.985	0.00065	0.00438462	yes
XLOC_031832	XLOC_031832	Ndufa4	6:11900372-11907446	Control_PFC	Experimental_PFC	OK	259.105	344.086	0.409231	1.92103	0.00035	0.00253699	yes
XLOC_031851	XLOC_031851	Wnt2	6:17988939-18030585	Control_PFC	Experimental_PFC	OK	1.90313	4.22266	1.14978	3.64393	5e-05	0.000434753	yes
XLOC_031877	XLOC_031877	Cadps2	6:23262772-23839421	Control_PFC	Experimental_PFC	OK	23.886	36.6543	0.617818	2.67114	5e-05	0.000434753	yes
XLOC_031897	XLOC_031897	Grm8	6:27275118-28135178	Control_PFC	Experimental_PFC	OK	16.4056	8.85235	-0.890055	-3.0431	5e-05	0.000434753	yes
XLOC_031937	XLOC_031937	Lincpint	6:31093558-31218474	Control_PFC	Experimental_PFC	OK	27.1086	49.44	0.86693	2.5065	5e-05	0.000434753	yes
XLOC_031955	XLOC_031955	Akr1b3	6:34290264-34324249	Control_PFC	Experimental_PFC	OK	14.9112	23.1733	0.636067	2.82664	5e-05	0.000434753	yes
XLOC_031968	XLOC_031968	Slc13a4	6:35267956-35308131	Control_PFC	Experimental_PFC	OK	3.61422	1.58455	-1.18961	-3.56761	5e-05	0.000434753	yes
XLOC_031970	XLOC_031970	Mtpn	6:35508905-35539888	Control_PFC	Experimental_PFC	OK	60.6688	85.6067	0.496768	1.61149	0.01025	0.046202	yes
XLOC_031974	XLOC_031974	9330158H04Rik	6:36209619-36528414	Control_PFC	Experimental_PFC	OK	4.62832	1.06231	-2.12328	-1.71275	0.0001	0.000825347	yes
XLOC_031977	XLOC_031977	Dgki	6:36846021-37300184	Control_PFC	Experimental_PFC	OK	45.8984	89.8163	0.968535	2.79056	5e-05	0.000434753	yes
XLOC_031984	XLOC_031984	Zc3hav1	6:38305285-38354603	Control_PFC	Experimental_PFC	OK	1.8128	1.25974	-0.525096	-1.70954	0.00365	0.0193807	yes
XLOC_031989	XLOC_031989	Hipk2	6:38694389-39084585	Control_PFC	Experimental_PFC	OK	16.8121	10.8306	-0.634376	-2.02346	0.00035	0.00253699	yes
XLOC_031992	XLOC_031992	Parp12	6:39086409-39118349	Control_PFC	Experimental_PFC	OK	2.91981	2.0067	-0.541047	-1.50637	0.0093	0.0425817	yes
XLOC_031999	XLOC_031999	Dennd2a	6:39462377-39557867	Control_PFC	Experimental_PFC	OK	8.55984	6.3107	-0.439784	-1.49309	0.0095	0.0433594	yes
XLOC_032055	XLOC_032055	Rny1	6:47788068-47788180	Control_PFC	Experimental_PFC	OK	39812	165315	2.05394	9.23486	5e-05	0.000434753	yes
XLOC_032076	XLOC_032076	Osbpl3	6:50293329-50456201	Control_PFC	Experimental_PFC	OK	11.9614	16.7162	0.482863	1.54595	0.00655	0.0317811	yes
XLOC_032078	XLOC_032078	Cycs	6:50562562-50566538	Control_PFC	Experimental_PFC	OK	36.2861	58.6744	0.693312	2.11524	0.00015	0.00118995	yes
XLOC_032086	XLOC_032086	Hnrnpa2b1	6:51460433-51469894	Control_PFC	Experimental_PFC	OK	70.0343	52.7592	-0.408638	-1.64583	0.00425	0.022041	yes
XLOC_032108	XLOC_032108	Tril	6:53815465-53820830	Control_PFC	Experimental_PFC	OK	9.25385	6.92853	-0.417505	-1.97785	0.00095	0.00609393	yes
XLOC_032131	XLOC_032131	Nt5c3	6:56882399-56923932	Control_PFC	Experimental_PFC	OK	20.117	25.4814	0.341027	1.55095	0.0059	0.0291076	yes
XLOC_032162	XLOC_032162	Gprin3	6:59352460-59426290	Control_PFC	Experimental_PFC	OK	6.03064	12.5983	1.06285	4.5823	5e-05	0.000434753	yes
XLOC_032315	XLOC_032315	Gm22486	6:71880647-71908762	Control_PFC	Experimental_PFC	OK	6992.1	13109.4	0.906809	3.4674	5e-05	0.000434753	yes
XLOC_032354	XLOC_032354	Sema4f	6:82911884-82939769	Control_PFC	Experimental_PFC	OK	8.67306	10.9846	0.34087	1.52164	0.00655	0.0317811	yes
XLOC_032384	XLOC_032384	Spr	6:85133677-85137766	Control_PFC	Experimental_PFC	OK	13.3797	17.9064	0.420436	1.77941	0.00195	0.0113736	yes
XLOC_032386	XLOC_032386	Rab11fip5	6:85334962-85374634	Control_PFC	Experimental_PFC	OK	16.5982	21.1595	0.350282	1.42297	0.00685	0.0329618	yes
XLOC_032389	XLOC_032389	Egr4	6:85511120-85513589	Control_PFC	Experimental_PFC	OK	6.98433	13.2318	0.921819	4.06713	5e-05	0.000434753	yes
XLOC_032391	XLOC_032391	Cml3	6:85721924-85765754	Control_PFC	Experimental_PFC	OK	1.90901	1.20546	-0.663243	-1.44925	0.0102	0.0460195	yes
XLOC_032422	XLOC_032422	Cnbp	6:87842614-87851106	Control_PFC	Experimental_PFC	OK	81.4941	103.305	0.342139	1.49721	0.0093	0.0425817	yes
XLOC_032429	XLOC_032429	Eefsec	6:88257333-88446539	Control_PFC	Experimental_PFC	OK	7.25282	9.91889	0.451637	2.05232	0.00055	0.00378661	yes
XLOC_032440	XLOC_032440	Chchd6	6:89383145-89595652	Control_PFC	Experimental_PFC	OK	27.5557	41.6117	0.594638	2.78185	5e-05	0.000434753	yes
XLOC_032461	XLOC_032461	Chchd4	6:91464275-91473423	Control_PFC	Experimental_PFC	OK	10.7341	14.6673	0.450399	1.86112	0.00115	0.00719815	yes
XLOC_032463	XLOC_032463	Grip2	6:91761508-91827250	Control_PFC	Experimental_PFC	OK	9.35853	4.5064	-1.0543	-3.11394	5e-05	0.000434753	yes
XLOC_032467	XLOC_032467	Trh	6:92242060-92244650	Control_PFC	Experimental_PFC	OK	8.3056	0.644597	-3.68761	-7.69312	5e-05	0.000434753	yes
XLOC_032469	XLOC_032469	Adamts9	6:92772698-93272889	Control_PFC	Experimental_PFC	OK	0.892103	0.414421	-1.10611	-1.81637	0.0004	0.00285605	yes
XLOC_032493	XLOC_032493	Gm765	6:98238013-98342754	Control_PFC	Experimental_PFC	OK	2.0192	4.57662	1.1805	2.62724	5e-05	0.000434753	yes
XLOC_032520	XLOC_032520	Oxtr	6:112473683-112489808	Control_PFC	Experimental_PFC	OK	2.07496	1.41424	-0.553055	-1.92145	0.00105	0.00665123	yes
XLOC_032533	XLOC_032533	Prrt3	6:113494094-113501818	Control_PFC	Experimental_PFC	OK	12.1642	16.8094	0.466628	2.18303	0.0002	0.00154481	yes
XLOC_032551	XLOC_032551	Rpl32	6:115805504-115808747	Control_PFC	Experimental_PFC	OK	195.688	289.825	0.566623	2.52218	5e-05	0.000434753	yes
XLOC_032555	XLOC_032555	Plxnd1	6:115954810-115995005	Control_PFC	Experimental_PFC	OK	12.9099	18.3411	0.506601	2.00337	5e-05	0.000434753	yes
XLOC_032562	XLOC_032562	Rassf4	6:116633007-116673836	Control_PFC	Experimental_PFC	OK	1.9849	1.01737	-0.96423	-3.33855	5e-05	0.000434753	yes
XLOC_032573	XLOC_032573	Ret	6:118151747-118197744	Control_PFC	Experimental_PFC	OK	0.871655	0.569573	-0.613877	-1.76566	0.0034	0.0182591	yes
XLOC_032574	XLOC_032574	Bms1	6:118383382-118419417	Control_PFC	Experimental_PFC	OK	9.28382	7.43126	-0.321112	-1.5164	0.0084	0.0391051	yes
XLOC_032591	XLOC_032591	Cecr6	6:120488938-120493807	Control_PFC	Experimental_PFC	OK	16.2596	21.3622	0.393772	1.85667	0.00105	0.00665123	yes
XLOC_032593	XLOC_032593	Atp6v1e1	6:120795244-120822685	Control_PFC	Experimental_PFC	OK	170.122	225.175	0.40448	1.79021	0.0018	0.0106044	yes
XLOC_032598	XLOC_032598	Gm15856	6:121210733-121226854	Control_PFC	Experimental_PFC	OK	2.09082	0.821819	-1.34717	-1.64097	0.0085	0.0395067	yes
XLOC_032600	XLOC_032600	Iqsec3	6:121372932-121473678	Control_PFC	Experimental_PFC	OK	33.7692	26.1752	-0.367507	-1.60831	0.0048	0.0244327	yes
XLOC_032627	XLOC_032627	A330044P14Rik	6:123934425-123982173	Control_PFC	Experimental_PFC	OK	2.54749	1.4526	-0.810439	-2.45967	0.0001	0.000825347	yes
XLOC_032635	XLOC_032635	Clstn3	6:124430758-124464794	Control_PFC	Experimental_PFC	OK	101.538	137.573	0.438172	1.55438	0.0046	0.0235668	yes
XLOC_032643	XLOC_032643	Atn1,Grcc10	6:124739182-124756524	Control_PFC	Experimental_PFC	OK	125.896	173.022	0.45872	1.5185	0.009	0.0414631	yes
XLOC_032645	XLOC_032645	Lrrc23	6:124769862-124779727	Control_PFC	Experimental_PFC	OK	1.17348	0.395896	-1.5676	-1.06612	0.00595	0.0293067	yes
XLOC_032646	XLOC_032646	Tpi1	6:124808660-124814296	Control_PFC	Experimental_PFC	OK	250.081	347.163	0.473218	1.74665	0.00205	0.0118768	yes
XLOC_032647	XLOC_032647	Usp5	6:124815018-124829484	Control_PFC	Experimental_PFC	OK	57.5352	80.1487	0.478232	1.94932	0.0004	0.00285605	yes
XLOC_032651	XLOC_032651	Cd4	6:124864691-124888221	Control_PFC	Experimental_PFC	OK	2.0571	8.55291	2.0558	3.47139	5e-05	0.000434753	yes
XLOC_032654	XLOC_032654	Cops7a	6:124958412-124965538	Control_PFC	Experimental_PFC	OK	47.3518	71.8869	0.602309	2.33215	0.0001	0.000825347	yes
XLOC_032656	XLOC_032656	Ncapd2	6:125168006-125191701	Control_PFC	Experimental_PFC	OK	1022.64	3373.39	1.7219	6.45267	5e-05	0.000434753	yes
XLOC_032667	XLOC_032667	Kcna1	6:126532552-126698192	Control_PFC	Experimental_PFC	OK	29.2461	37.6028	0.362595	1.491	0.00915	0.042016	yes
XLOC_032669	XLOC_032669	Ndufa9	6:126821953-126849136	Control_PFC	Experimental_PFC	OK	55.5222	75.7646	0.448459	2.11753	0.0003	0.00221024	yes
XLOC_032673	XLOC_032673	Tigar	6:127085115-127110467	Control_PFC	Experimental_PFC	OK	6.0772	9.80764	0.690499	2.46268	0.0001	0.000825347	yes
XLOC_032681	XLOC_032681	Prmt8	6:127689010-127769472	Control_PFC	Experimental_PFC	OK	19.3676	24.804	0.356926	1.63843	0.0041	0.0213755	yes
XLOC_032690	XLOC_032690	Gm10010	6:128187845-128200623	Control_PFC	Experimental_PFC	OK	5.22482	6.96389	0.414512	1.69343	0.00355	0.0189337	yes
XLOC_032694	XLOC_032694	Tulp3	6:128321139-128355851	Control_PFC	Experimental_PFC	OK	6.86551	4.83676	-0.505326	-1.5109	0.0067	0.0323673	yes
XLOC_032789	XLOC_032789	Hebp1	6:135137518-135168215	Control_PFC	Experimental_PFC	OK	7.11844	11.5277	0.695472	2.48061	5e-05	0.000434753	yes
XLOC_032800	XLOC_032800	Hist4h4	6:136801552-136804431	Control_PFC	Experimental_PFC	OK	8.89692	21.3142	1.26044	5.85928	5e-05	0.000434753	yes
XLOC_032851	XLOC_032851	Lmntd1	6:145365133-145614319	Control_PFC	Experimental_PFC	OK	1.1299	0.236503	-2.25626	-1.55457	0.0006	0.00409089	yes
XLOC_032855	XLOC_032855	Itpr2	6:146108298-146502223	Control_PFC	Experimental_PFC	OK	8.19816	4.62006	-0.827391	-1.57979	0.0067	0.0323673	yes
XLOC_032896	XLOC_032896	Cacng7	7:3332954-3368216	Control_PFC	Experimental_PFC	OK	25.4672	19.3189	-0.398626	-1.85688	0.0012	0.00747245	yes
XLOC_032900	XLOC_032900	Ndufa3	7:3617372-3620163	Control_PFC	Experimental_PFC	OK	144.656	198.358	0.45548	2.07071	0.00025	0.00188079	yes
XLOC_032902	XLOC_032902	Cnot3	7:3645289-3677524	Control_PFC	Experimental_PFC	OK	9.81264	5.95102	-0.721504	-1.87391	0.0001	0.000825347	yes
XLOC_032908	XLOC_032908	Leng8	7:4137038-4150374	Control_PFC	Experimental_PFC	OK	59.3656	36.2271	-0.712558	-2.0156	0.00025	0.00188079	yes
XLOC_033060	XLOC_033060	Slc8a2	7:16130299-16160509	Control_PFC	Experimental_PFC	OK	51.3737	70.0767	0.447905	1.92805	0.00095	0.00609393	yes
XLOC_033064	XLOC_033064	Tmem160	7:16452778-16455489	Control_PFC	Experimental_PFC	OK	16.2357	29.5905	0.865967	3.59644	5e-05	0.000434753	yes
XLOC_033069	XLOC_033069	Ap2s1	7:16738409-16749294	Control_PFC	Experimental_PFC	OK	97.2704	146.786	0.59364	2.80007	5e-05	0.000434753	yes
XLOC_033076	XLOC_033076	Pnmal2	7:16944681-16948828	Control_PFC	Experimental_PFC	OK	66.2458	52.0557	-0.347772	-1.51638	0.0088	0.0406949	yes
XLOC_033079	XLOC_033079	Psg16	7:17074039-17133450	Control_PFC	Experimental_PFC	OK	2.64388	1.72708	-0.614317	-1.82256	0.00045	0.00317388	yes
XLOC_033100	XLOC_033100	Irf2bp1	7:19004064-19006761	Control_PFC	Experimental_PFC	OK	11.9912	15.3422	0.35553	1.6804	0.00275	0.01525	yes
XLOC_033104	XLOC_033104	Dmpk	7:19083848-19093821	Control_PFC	Experimental_PFC	OK	9.34343	5.87705	-0.668861	-1.7056	0.0028	0.0154813	yes
XLOC_033108	XLOC_033108	Snrpd2	7:19149721-19152735	Control_PFC	Experimental_PFC	OK	51.6799	66.4074	0.361741	1.70465	0.0031	0.0168727	yes
XLOC_033116	XLOC_033116	Ppp1r13l	7:19359748-19378533	Control_PFC	Experimental_PFC	OK	0.653259	1.54576	1.24259	1.11583	0.00785	0.0369682	yes
XLOC_033117	XLOC_033117	Ercc2	7:19382009-19404104	Control_PFC	Experimental_PFC	OK	21473.2	8.29193	-11.3385	-29.7499	5e-05	0.000434753	yes
XLOC_033120	XLOC_033120	Trappc6a	7:19508669-19516145	Control_PFC	Experimental_PFC	OK	5.31922	9.71645	0.869214	2.47376	5e-05	0.000434753	yes
XLOC_033177	XLOC_033177	Zfp180	7:24081923-24107698	Control_PFC	Experimental_PFC	OK	19.9865	25.8518	0.37124	1.7523	0.00245	0.0138233	yes
XLOC_033188	XLOC_033188	Cadm4	7:24482022-24504539	Control_PFC	Experimental_PFC	OK	75.3289	96.7661	0.361298	1.64017	0.00485	0.0246483	yes
XLOC_033189	XLOC_033189	Zfp428	7:24507005-24515682	Control_PFC	Experimental_PFC	OK	15.0326	20.3514	0.437035	1.91387	0.0007	0.00467802	yes
XLOC_033192	XLOC_033192	Ethe1	7:24583837-24608925	Control_PFC	Experimental_PFC	OK	4.25224	6.4082	0.591695	1.86809	0.0007	0.00467802	yes
XLOC_033200	XLOC_033200	Rps19	7:24884370-24889806	Control_PFC	Experimental_PFC	OK	206.248	295.707	0.51979	2.36376	5e-05	0.000434753	yes
XLOC_033202	XLOC_033202	Arhgef1	7:24902911-24926592	Control_PFC	Experimental_PFC	OK	13.5254	8.01899	-0.754181	-2.09293	0.00015	0.00118995	yes
XLOC_033213	XLOC_033213	B3gnt8	7:25627623-25629490	Control_PFC	Experimental_PFC	OK	0.742951	0.290214	-1.35615	-1.82763	0.0058	0.028702	yes
XLOC_033214	XLOC_033214	Exosc5	7:25659152-25668031	Control_PFC	Experimental_PFC	OK	5.80324	8.18789	0.496632	1.61507	0.0057	0.0282782	yes
XLOC_033239	XLOC_033239	Blvrb	7:27447977-27466144	Control_PFC	Experimental_PFC	OK	9.73872	15.3294	0.654501	2.47495	5e-05	0.000434753	yes
XLOC_033241	XLOC_033241	Sertad1	7:27486909-27490316	Control_PFC	Experimental_PFC	OK	8.75798	13.602	0.63515	2.44836	5e-05	0.000434753	yes
XLOC_033243	XLOC_033243	Hipk4	7:27523266-27531175	Control_PFC	Experimental_PFC	OK	10.6782	14.7051	0.461652	2.16032	5e-05	0.000434753	yes
XLOC_033245	XLOC_033245	Akt2	7:27591551-27640826	Control_PFC	Experimental_PFC	OK	36.7	49.6915	0.437217	1.65924	0.00135	0.00827436	yes
XLOC_033246	XLOC_033246	Ttc9b	7:27653914-27656208	Control_PFC	Experimental_PFC	OK	46.2953	78.455	0.760998	3.60253	5e-05	0.000434753	yes
XLOC_033258	XLOC_033258	Eid2	7:28267880-28269272	Control_PFC	Experimental_PFC	OK	12.0164	16.3233	0.441927	1.93256	0.001	0.00637663	yes
XLOC_033262	XLOC_033262	Paf1	7:28392950-28399388	Control_PFC	Experimental_PFC	OK	26.9754	17.5265	-0.622105	-2.0133	0.0006	0.00409089	yes
XLOC_033275	XLOC_033275	Ech1	7:28825216-28832247	Control_PFC	Experimental_PFC	OK	21.6562	27.4495	0.342004	1.46209	0.00955	0.0435409	yes
XLOC_033286	XLOC_033286	Yif1b	7:29238328-29248432	Control_PFC	Experimental_PFC	OK	16.7125	28.7329	0.781778	3.04651	5e-05	0.000434753	yes
XLOC_033287	XLOC_033287	Ppp1r14a	7:29289319-29293390	Control_PFC	Experimental_PFC	OK	7.02839	11.6436	0.728264	1.97848	0.00115	0.00719815	yes
XLOC_033311	XLOC_033311	Syne4	7:30314806-30319046	Control_PFC	Experimental_PFC	OK	1.9485	1.00384	-0.956836	-0.795437	0.00715	0.0341752	yes
XLOC_033313	XLOC_033313	Tyrobp	7:30413787-30417577	Control_PFC	Experimental_PFC	OK	13.7389	21.218	0.62702	2.12234	0.0003	0.00221024	yes
XLOC_033327	XLOC_033327	Dmkn	7:30763755-30781063	Control_PFC	Experimental_PFC	OK	0.811937	2.97169	1.87184	2.37303	0.0004	0.00285605	yes
XLOC_033468	XLOC_033468	Gm4790	7:39566945-39570556	Control_PFC	Experimental_PFC	OK	2.58292	1.55261	-0.734308	-2.47383	0.0001	0.000825347	yes
XLOC_033470	XLOC_033470	Gm28582	7:39579081-39580589	Control_PFC	Experimental_PFC	OK	1.03907	0.528423	-0.975524	-1.70701	0.00565	0.0280641	yes
XLOC_033497	XLOC_033497	Gm17102	7:41393697-41397447	Control_PFC	Experimental_PFC	OK	0.859562	1.65728	0.94714	1.56784	0.0098	0.0445054	yes
XLOC_033562	XLOC_033562	Syt3	7:44360042-44400187	Control_PFC	Experimental_PFC	OK	13.8499	19.0496	0.459885	1.79922	0.0011	0.00692755	yes
XLOC_033568	XLOC_033568	Kcnc3	7:44590663-44604754	Control_PFC	Experimental_PFC	OK	13.1963	18.0025	0.448064	1.9911	0.00075	0.00496726	yes
XLOC_033580	XLOC_033580	Nosip	7:45053612-45078503	Control_PFC	Experimental_PFC	OK	22.9526	37.9183	0.724239	2.16763	0.00015	0.00118995	yes
XLOC_033582	XLOC_033582	Pih1d1	7:45140683-45160069	Control_PFC	Experimental_PFC	OK	16.4784	24.1716	0.552738	2.05631	0.0003	0.00221024	yes
XLOC_033604	XLOC_033604	Ntn5	7:45677688-45694556	Control_PFC	Experimental_PFC	OK	1.6564	2.63188	0.668044	1.60288	0.00555	0.0276319	yes
XLOC_033607	XLOC_033607	Rpl18	7:45705087-45720835	Control_PFC	Experimental_PFC	OK	105.818	183.224	0.792017	2.32761	5e-05	0.000434753	yes
XLOC_033622	XLOC_033622	Ldha	7:46841474-46855627	Control_PFC	Experimental_PFC	OK	105.58	171.044	0.696031	3.06861	5e-05	0.000434753	yes
XLOC_033638	XLOC_033638	Nav2	7:48908715-49610090	Control_PFC	Experimental_PFC	OK	32.7878	19.4292	-0.754933	-2.5017	0.0001	0.000825347	yes
XLOC_033641	XLOC_033641	Htatip2	7:49759105-49773999	Control_PFC	Experimental_PFC	OK	3.01533	4.36382	0.533277	1.60898	0.00645	0.0313746	yes
XLOC_033644	XLOC_033644	Nell1	7:49974863-50865255	Control_PFC	Experimental_PFC	OK	26.4693	35.0866	0.4066	1.8081	0.00225	0.0128619	yes
XLOC_033649	XLOC_033649	Gas2	7:51860576-51994975	Control_PFC	Experimental_PFC	OK	11.7672	33.2547	1.49879	3.35885	5e-05	0.000434753	yes
XLOC_033652	XLOC_033652	Luzp2	7:54835958-55265366	Control_PFC	Experimental_PFC	OK	58.5762	46.0594	-0.346816	-1.6248	0.0047	0.0239971	yes
XLOC_033654	XLOC_033654	Siglech	7:55768177-55778925	Control_PFC	Experimental_PFC	OK	5.9104	8.76087	0.567817	1.76556	0.0013	0.0080057	yes
XLOC_033665	XLOC_033665	Atp10a	7:58658201-58829426	Control_PFC	Experimental_PFC	OK	3.24024	2.01611	-0.684527	-2.80005	5e-05	0.000434753	yes
XLOC_033668	XLOC_033668	Ndn	7:62348276-62349928	Control_PFC	Experimental_PFC	OK	68.1914	88.1447	0.370284	1.72002	0.00265	0.0147724	yes
XLOC_033683	XLOC_033683	Apba2	7:64501705-64753870	Control_PFC	Experimental_PFC	OK	77.622	107.181	0.465515	1.45614	0.0108	0.0482642	yes
XLOC_033685	XLOC_033685	Tarsl2,Tm2d3	7:65644897-65701913	Control_PFC	Experimental_PFC	OK	31.5478	43.004	0.446928	1.55535	0.0058	0.028702	yes
XLOC_033690	XLOC_033690	Vimp	7:66079648-66089412	Control_PFC	Experimental_PFC	OK	14.7645	19.5728	0.406719	1.78729	0.00215	0.0123726	yes
XLOC_033720	XLOC_033720	Akap13	7:75455533-75754609	Control_PFC	Experimental_PFC	OK	15.116	9.51975	-0.667081	-1.76311	0.00125	0.00774258	yes
XLOC_033730	XLOC_033730	Acan	7:79053482-79115099	Control_PFC	Experimental_PFC	OK	1.61268	0.885561	-0.864797	-3.07262	5e-05	0.000434753	yes
XLOC_033735	XLOC_033735	A330074H02Rik	7:79500025-79534403	Control_PFC	Experimental_PFC	OK	5.28184	1.7059	-1.63051	-2.07026	0.00115	0.00719815	yes
XLOC_033737	XLOC_033737	Gm37608	7:79500025-79534403	Control_PFC	Experimental_PFC	OK	4.78105	2.34061	-1.03044	-2.15404	0.00065	0.00438462	yes
XLOC_033764	XLOC_033764	2900076A07Rik,Mir1839,mmu-mir-1839	7:81523549-81532521	Control_PFC	Experimental_PFC	OK	9.12827	5.43124	-0.74906	-1.34511	0.00805	0.0377781	yes
XLOC_033765	XLOC_033765	Whamm	7:81571291-81596836	Control_PFC	Experimental_PFC	OK	3.7293	2.74966	-0.439653	-1.63093	0.00495	0.0250703	yes
XLOC_033772	XLOC_033772	Adamtsl3	7:82335693-82614450	Control_PFC	Experimental_PFC	OK	1.05839	0.534764	-0.9849	-1.03239	0.01025	0.046202	yes
XLOC_033842	XLOC_033842	Gm26981	7:92729839-92733748	Control_PFC	Experimental_PFC	OK	3.0375	1.90038	-0.676594	-2.31309	0.0001	0.000825347	yes
XLOC_033846	XLOC_033846	Fam181b	7:93006981-93104789	Control_PFC	Experimental_PFC	OK	11.1181	8.69536	-0.354597	-1.51978	0.0075	0.0355876	yes
XLOC_033854	XLOC_033854	Gab2	7:97081750-97308940	Control_PFC	Experimental_PFC	OK	4.43621	3.49445	-0.344262	-1.58865	0.0053	0.0265686	yes
XLOC_033857	XLOC_033857	Ndufc2	7:97400002-97407802	Control_PFC	Experimental_PFC	OK	54.0537	69.9125	0.371155	1.72913	0.00305	0.0166423	yes
XLOC_033903	XLOC_033903	Stard10	7:101317085-101346626	Control_PFC	Experimental_PFC	OK	36.4985	47.6219	0.383788	1.62759	0.00625	0.0305581	yes
XLOC_033905	XLOC_033905	Pde2a	7:101421690-101512829	Control_PFC	Experimental_PFC	OK	77.8124	100.299	0.366236	1.45482	0.0108	0.0482642	yes
XLOC_033912	XLOC_033912	Numa1	7:101969842-102014959	Control_PFC	Experimental_PFC	OK	20.0631	14.813	-0.43768	-2.03322	0.00045	0.00317388	yes
XLOC_033957	XLOC_033957	Olfr613	7:103550367-103555504	Control_PFC	Experimental_PFC	OK	10.4523	6.61895	-0.659148	-3.14056	5e-05	0.000434753	yes
XLOC_034009	XLOC_034009	Smpd1	7:105554359-105558388	Control_PFC	Experimental_PFC	OK	36.5174	48.5251	0.410147	1.9297	0.0008	0.00525136	yes
XLOC_034027	XLOC_034027	Syt9	7:107370727-107548656	Control_PFC	Experimental_PFC	OK	2.76429	1.79356	-0.62408	-1.89352	0.00045	0.00317388	yes
XLOC_034061	XLOC_034061	Snora23	7:109998375-110151202	Control_PFC	Experimental_PFC	OK	182.515	997.656	2.45052	3.25768	5e-05	0.000434753	yes
XLOC_034093	XLOC_034093	Xylt1	7:117380978-117667751	Control_PFC	Experimental_PFC	OK	18.9353	13.7314	-0.463596	-1.58857	0.00575	0.0284944	yes
XLOC_034125	XLOC_034125	Mettl9	7:121033251-121076834	Control_PFC	Experimental_PFC	OK	22.5934	28.5952	0.339873	1.53367	0.00825	0.0385281	yes
XLOC_034137	XLOC_034137	Prkcb	7:122288750-122634402	Control_PFC	Experimental_PFC	OK	204.3	284.76	0.479061	1.52621	0.0076	0.0360012	yes
[truncated: 478 more rows]

## Sheet: Female-Hypo DEGs
test_id	gene_id	gene	locus	sample_1	sample_2	status	value_1	value_2	log2(fold_change)	test_stat	p_value	q_value	significant
XLOC_000284	XLOC_000284	Slc9a2	1:40680573-40769273	Control_Hypo	Experimental_Hypo	OK	1.47257	0.774998	-0.926072	-2.49842	0.00015	0.00118995	yes
XLOC_000308	XLOC_000308	1500015O10Rik	1:43730601-43743895	Control_Hypo	Experimental_Hypo	OK	2.15894	15.2	2.81567	6.461	5e-05	0.000434753	yes
XLOC_000544	XLOC_000544	Gm25360	1:72226239-72226430	Control_Hypo	Experimental_Hypo	OK	197.067	365.109	0.889641	3.39323	5e-05	0.000434753	yes
XLOC_000548	XLOC_000548	Gm25939	1:72236464-72284314	Control_Hypo	Experimental_Hypo	OK	3607.56	7495.45	1.05499	3.9282	5e-05	0.000434753	yes
XLOC_000554	XLOC_000554	Igfbp2	1:72824502-72852474	Control_Hypo	Experimental_Hypo	OK	8.69029	18.347	1.07807	3.98711	5e-05	0.000434753	yes
XLOC_000583	XLOC_000583	Wnt6	1:74771891-74785322	Control_Hypo	Experimental_Hypo	OK	0.88073	0.220424	-1.99842	-2.12056	0.0059	0.0291076	yes
XLOC_000721	XLOC_000721	Gm25395	1:87755869-87792428	Control_Hypo	Experimental_Hypo	OK	1054.42	1913.14	0.85949	2.06535	0.0055	0.0274201	yes
XLOC_000758	XLOC_000758	D130058E05Rik	1:89927955-89933290	Control_Hypo	Experimental_Hypo	OK	0.210624	1.41091	2.74389	2.87575	0.00035	0.00253699	yes
XLOC_001076	XLOC_001076	Fmod	1:134037253-134048277	Control_Hypo	Experimental_Hypo	OK	2.94448	1.04497	-1.49455	-3.6791	5e-05	0.000434753	yes
XLOC_001221	XLOC_001221	Rgs16	1:153740348-153749324	Control_Hypo	Experimental_Hypo	OK	4.55385	12.2081	1.42268	5.322	5e-05	0.000434753	yes
XLOC_001324	XLOC_001324	F5	1:164115263-164220277	Control_Hypo	Experimental_Hypo	OK	0.488848	2.95619	2.59628	6.74751	5e-05	0.000434753	yes
XLOC_001398	XLOC_001398	Pfdn2	1:171345669-171360798	Control_Hypo	Experimental_Hypo	OK	32.3054	48.1624	0.576133	1.90685	0.00315	0.0171177	yes
XLOC_001412	XLOC_001412	Tma7-ps	1:171711087-171711282	Control_Hypo	Experimental_Hypo	OK	7.7299	20.8535	1.43177	2.84901	0.0107	0.0478777	yes
XLOC_001531	XLOC_001531	Gm37086	1:181026277-181029729	Control_Hypo	Experimental_Hypo	OK	2.81558	3.85399	0.452918	1.75637	0.00655	0.0317811	yes
XLOC_001832	XLOC_001832	Ogfrl1	1:23366423-23397772	Control_Hypo	Experimental_Hypo	OK	12.6502	19.2368	0.604707	1.84931	0.00435	0.0224687	yes
XLOC_001841	XLOC_001841	Gm28437	1:24613188-24613971	Control_Hypo	Experimental_Hypo	OK	2.15483	4.97559	1.20729	2.6853	0.00025	0.00188079	yes
XLOC_002189	XLOC_002189	Fzd5	1:64730557-64740607	Control_Hypo	Experimental_Hypo	OK	3.15069	1.77524	-0.827656	-3.32289	5e-05	0.000434753	yes
XLOC_002291	XLOC_002291	Resp18	1:75272198-75278415	Control_Hypo	Experimental_Hypo	OK	418.515	310.587	-0.430283	-1.79599	0.0052	0.0261449	yes
XLOC_002420	XLOC_002420	Gbx2	1:89927955-89933290	Control_Hypo	Experimental_Hypo	OK	0.411973	2.8063	2.76805	3.33484	0.0005	0.00348019	yes
XLOC_002746	XLOC_002746	Gm37903	1:137528849-137531230	Control_Hypo	Experimental_Hypo	OK	15.1202	20.4486	0.435518	2.00429	0.0024	0.0135779	yes
XLOC_002759	XLOC_002759	Lhx9	1:138825185-138848577	Control_Hypo	Experimental_Hypo	OK	0.950778	2.81648	1.56671	4.18097	5e-05	0.000434753	yes
XLOC_002886	XLOC_002886	Fam163a	1:156075965-156205026	Control_Hypo	Experimental_Hypo	OK	0.899339	1.42994	0.669013	1.93878	0.0032	0.0173398	yes
XLOC_002943	XLOC_002943	Gm37357	1:161811044-161814167	Control_Hypo	Experimental_Hypo	OK	1.76608	6.91412	1.969	7.06762	5e-05	0.000434753	yes
XLOC_003016	XLOC_003016	Mgst3	1:167371965-167393841	Control_Hypo	Experimental_Hypo	OK	19.9895	26.3725	0.399788	1.81685	0.0051	0.0257162	yes
XLOC_003051	XLOC_003051	Pcp4l1	1:171173261-171196268	Control_Hypo	Experimental_Hypo	OK	17.221	25.9898	0.593778	2.75614	5e-05	0.000434753	yes
XLOC_003168	XLOC_003168	6330403A02Rik	1:180432386-180483504	Control_Hypo	Experimental_Hypo	OK	6.70295	18.1578	1.43772	5.00522	5e-05	0.000434753	yes
XLOC_003314	XLOC_003314	Plekhg1	10:3740363-3967303	Control_Hypo	Experimental_Hypo	OK	4.94976	13.5117	1.44878	2.99787	5e-05	0.000434753	yes
XLOC_003481	XLOC_003481	Rnu3a	10:40258466-40258680	Control_Hypo	Experimental_Hypo	OK	662.59	878.517	0.406953	1.79082	0.0046	0.0235668	yes
XLOC_003570	XLOC_003570	Sowahc	10:59221952-59226434	Control_Hypo	Experimental_Hypo	OK	3.70152	5.34593	0.530324	2.35583	0.00035	0.00253699	yes
XLOC_003898	XLOC_003898	Atp2b1	10:98915151-99026143	Control_Hypo	Experimental_Hypo	OK	22.5946	30.4342	0.429717	1.9021	0.00355	0.0189337	yes
XLOC_003958	XLOC_003958	Caps2	10:112163620-112216555	Control_Hypo	Experimental_Hypo	OK	1.97116	3.46602	0.81424	2.52941	0.0003	0.00221024	yes
XLOC_003959	XLOC_003959	Kcnc2	10:112271122-112466304	Control_Hypo	Experimental_Hypo	OK	12.5746	19.6926	0.647144	2.96691	5e-05	0.000434753	yes
XLOC_004005	XLOC_004005	Wif1	10:121033959-121100650	Control_Hypo	Experimental_Hypo	OK	2.02627	1.11533	-0.86135	-2.15264	0.0014	0.00853755	yes
XLOC_004162	XLOC_004162	Phactr2	10:13207716-13474396	Control_Hypo	Experimental_Hypo	OK	8.16499	11.3492	0.475064	1.66189	0.0091	0.0418333	yes
XLOC_004188	XLOC_004188	4933406P04Rik	10:20310505-20312294	Control_Hypo	Experimental_Hypo	OK	0.938591	0.478274	-0.972657	-1.73461	0.0102	0.0460195	yes
XLOC_004468	XLOC_004468	Adarb1	10:77290725-77418270	Control_Hypo	Experimental_Hypo	OK	36.9985	52.7931	0.512885	1.66509	0.00455	0.0233511	yes
XLOC_004505	XLOC_004505	C2cd4c	10:79606856-79614025	Control_Hypo	Experimental_Hypo	OK	3.55624	2.66281	-0.417401	-1.87605	0.0032	0.0173398	yes
XLOC_004548	XLOC_004548	Diras1	10:81019588-81026567	Control_Hypo	Experimental_Hypo	OK	15.4817	22.9116	0.56551	2.43871	0.0001	0.000825347	yes
XLOC_004772	XLOC_004772	Rassf3	10:121410349-121476250	Control_Hypo	Experimental_Hypo	OK	2.33283	3.23552	0.47192	1.71724	0.0076	0.0360012	yes
XLOC_004780	XLOC_004780	Usp15	10:123113243-123196971	Control_Hypo	Experimental_Hypo	OK	3961.46	22.6004	-7.45354	-48.0431	5e-05	0.000434753	yes
XLOC_004824	XLOC_004824	Myl6b	10:128494156-128498685	Control_Hypo	Experimental_Hypo	OK	8.15644	11.3321	0.474397	1.70947	0.00815	0.0381515	yes
XLOC_004934	XLOC_004934	Aebp1	11:5861946-5872088	Control_Hypo	Experimental_Hypo	OK	6.3492	4.03133	-0.65532	-2.49739	5e-05	0.000434753	yes
XLOC_004948	XLOC_004948	Ramp3	11:6650147-6677475	Control_Hypo	Experimental_Hypo	OK	1.2579	8.16072	2.69768	6.43008	5e-05	0.000434753	yes
XLOC_004950	XLOC_004950	Adcy1	11:7063488-7178506	Control_Hypo	Experimental_Hypo	OK	9.42108	15.4084	0.709749	2.95297	5e-05	0.000434753	yes
XLOC_005092	XLOC_005092	Hba-a1	11:32283510-32284465	Control_Hypo	Experimental_Hypo	OK	175.865	69.0432	-1.34889	-6.10987	5e-05	0.000434753	yes
XLOC_005094	XLOC_005094	Hba-a2	11:32296488-32297298	Control_Hypo	Experimental_Hypo	OK	136.343	50.0926	-1.44457	-6.63371	5e-05	0.000434753	yes
XLOC_005218	XLOC_005218	Rasgef1c	11:49901834-49980994	Control_Hypo	Experimental_Hypo	OK	5.79074	3.82807	-0.597131	-2.06646	0.0006	0.00409089	yes
XLOC_005246	XLOC_005246	Col23a1	11:51289919-51583918	Control_Hypo	Experimental_Hypo	OK	5.32795	2.86012	-0.897504	-3.67816	5e-05	0.000434753	yes
XLOC_005296	XLOC_005296	Gpx3	11:54902452-54910377	Control_Hypo	Experimental_Hypo	OK	50.229	39.2819	-0.354654	-1.66657	0.00945	0.0431756	yes
XLOC_005358	XLOC_005358	Wnt9a	11:59306927-59333552	Control_Hypo	Experimental_Hypo	OK	0.498698	1.27983	1.35972	3.18017	5e-05	0.000434753	yes
XLOC_005393	XLOC_005393	Kcnj12	11:61022563-61071131	Control_Hypo	Experimental_Hypo	OK	5.0612	7.01367	0.470689	1.89456	0.0044	0.0226874	yes
XLOC_005610	XLOC_005610	Rtn4rl1	11:75193782-75267769	Control_Hypo	Experimental_Hypo	OK	4.24569	6.7751	0.674243	2.85834	5e-05	0.000434753	yes
XLOC_005700	XLOC_005700	Tmem98	11:80810174-80822033	Control_Hypo	Experimental_Hypo	OK	3.73655	5.4097	0.53384	1.77703	0.0064	0.0311599	yes
XLOC_005778	XLOC_005778	Ska2	11:87109233-87126958	Control_Hypo	Experimental_Hypo	OK	4.24926	2.76241	-0.621287	-1.70583	0.0074	0.0351869	yes
XLOC_005871	XLOC_005871	Ttll6	11:96133785-96165451	Control_Hypo	Experimental_Hypo	OK	0.877161	0.424784	-1.04611	-2.327	0.00105	0.00665123	yes
XLOC_005928	XLOC_005928	Ppp1r1b	11:98348403-98358283	Control_Hypo	Experimental_Hypo	OK	6.69342	10.3643	0.630811	2.16951	0.00065	0.00438462	yes
XLOC_006050	XLOC_006050	Wnt3	11:103774149-103817957	Control_Hypo	Experimental_Hypo	OK	0.692848	1.999	1.52867	4.01095	5e-05	0.000434753	yes
XLOC_006057	XLOC_006057	Itgb3	11:104607999-104670476	Control_Hypo	Experimental_Hypo	OK	0.716277	0.427939	-0.743113	-1.90439	0.0029	0.015939	yes
XLOC_006076	XLOC_006076	Ace	11:105965607-105989964	Control_Hypo	Experimental_Hypo	OK	8.30531	14.2582	0.77969	3.18606	5e-05	0.000434753	yes
XLOC_006088	XLOC_006088	Snord104	11:106500992-106501062	Control_Hypo	Experimental_Hypo	OK	0	1577900	inf	#NAME?	5e-05	0.000434753	yes
XLOC_006158	XLOC_006158	Rab37	11:115091430-115162236	Control_Hypo	Experimental_Hypo	OK	1.25079	3.32115	1.40884	3.32459	5e-05	0.000434753	yes
XLOC_006203	XLOC_006203	Mgat5b	11:116918862-116986948	Control_Hypo	Experimental_Hypo	OK	9.41438	14.9158	0.663905	1.98917	0.00265	0.0147724	yes
XLOC_006242	XLOC_006242	Gm11762	11:119548629-119569046	Control_Hypo	Experimental_Hypo	OK	0.978104	0.461515	-1.08361	-1.90892	0.00725	0.0345895	yes
XLOC_006257	XLOC_006257	Mrpl12	11:120484612-120489065	Control_Hypo	Experimental_Hypo	OK	10.9539	14.8921	0.443096	1.76543	0.00745	0.0353851	yes
XLOC_006339	XLOC_006339	Gck	11:5900819-5950081	Control_Hypo	Experimental_Hypo	OK	6.75121	5.07251	-0.412447	-1.60258	0.00955	0.0435409	yes
XLOC_006753	XLOC_006753	Fam183b	11:58792796-58801960	Control_Hypo	Experimental_Hypo	OK	16.3472	9.18522	-0.831657	-2.56402	0.0001	0.000825347	yes
XLOC_006782	XLOC_006782	Rasd1	11:59963180-59964944	Control_Hypo	Experimental_Hypo	OK	3.31659	5.96424	0.846638	2.76805	5e-05	0.000434753	yes
XLOC_006819	XLOC_006819	Slc47a1	11:61343400-61378345	Control_Hypo	Experimental_Hypo	OK	1.23655	0.513522	-1.26783	-1.79627	0.0007	0.00467802	yes
XLOC_006875	XLOC_006875	Usp43	11:67854522-67965651	Control_Hypo	Experimental_Hypo	OK	0.214839	0.665085	1.63028	1.46745	0.00725	0.0345895	yes
XLOC_006964	XLOC_006964	6330403K07Rik	11:71031940-71033513	Control_Hypo	Experimental_Hypo	OK	321.88	240.494	-0.420523	-1.66252	0.01065	0.047698	yes
XLOC_007040	XLOC_007040	Serpinf1	11:75409768-75423340	Control_Hypo	Experimental_Hypo	OK	5.88861	8.99115	0.610579	1.69383	0.00505	0.0254967	yes
XLOC_007244	XLOC_007244	Epn3	11:94489598-94499974	Control_Hypo	Experimental_Hypo	OK	1.21429	3.32162	1.45178	1.70901	0.0066	0.0319756	yes
XLOC_007419	XLOC_007419	P3h4	11:100408455-100414836	Control_Hypo	Experimental_Hypo	OK	7.97649	5.66113	-0.494664	-1.81562	0.00285	0.015712	yes
XLOC_007455	XLOC_007455	Gm23971	11:101645739-101645930	Control_Hypo	Experimental_Hypo	OK	51.4891	140.354	1.44673	3.80076	5e-05	0.000434753	yes
XLOC_007766	XLOC_007766	Pfn4	12:4769294-4778266	Control_Hypo	Experimental_Hypo	OK	3.84723	1.96998	-0.965641	-2.17226	0.00095	0.00609393	yes
XLOC_007859	XLOC_007859	Lamb1	12:31265233-31329644	Control_Hypo	Experimental_Hypo	OK	2.65346	4.08798	0.623516	1.50722	0.0105	0.0471333	yes
XLOC_007885	XLOC_007885	Sostdc1	12:36314168-36318452	Control_Hypo	Experimental_Hypo	OK	1.36841	10.4101	2.92741	8.14116	5e-05	0.000434753	yes
XLOC_008017	XLOC_008017	Prkch	12:73584796-73778185	Control_Hypo	Experimental_Hypo	OK	1.4275	3.8055	1.4146	4.77398	5e-05	0.000434753	yes
XLOC_008105	XLOC_008105	Fos	12:85473889-85477273	Control_Hypo	Experimental_Hypo	OK	9.18813	22.3751	1.28405	4.83778	5e-05	0.000434753	yes
XLOC_008247	XLOC_008247	Cyp46a1	12:108334376-108362231	Control_Hypo	Experimental_Hypo	OK	21.3947	28.0752	0.392039	1.82906	0.0054	0.0269987	yes
XLOC_008321	XLOC_008321	Mir134,Mir3072,Mir369,Mir377,Mir382,Mir410,Mir412,Mir485,Mir668,Mirg	12:109729763-109749460	Control_Hypo	Experimental_Hypo	OK	55.236	9826.01	7.47485	35.7449	5e-05	0.000434753	yes
XLOC_008408	XLOC_008408	Sp8	12:118846328-118852578	Control_Hypo	Experimental_Hypo	OK	0.419517	0.689501	0.716823	1.697	0.01	0.0452649	yes
XLOC_008601	XLOC_008601	Nkx2-1	12:56531957-56607476	Control_Hypo	Experimental_Hypo	OK	6.97197	5.14339	-0.438845	-1.77987	0.00665	0.0321725	yes
XLOC_008669	XLOC_008669	4930447C04Rik	12:72881108-72944899	Control_Hypo	Experimental_Hypo	OK	7.06099	11.515	0.705569	1.73426	0.0069	0.0331619	yes
XLOC_008774	XLOC_008774	Zdhhc22	12:86983380-86988676	Control_Hypo	Experimental_Hypo	OK	9.91026	14.8312	0.581645	2.01492	0.00205	0.0118768	yes
XLOC_008880	XLOC_008880	Clmn	12:104763113-104865076	Control_Hypo	Experimental_Hypo	OK	8.00004	12.2507	0.614787	2.76602	5e-05	0.000434753	yes
XLOC_009294	XLOC_009294	Elmo1	13:20090595-20606528	Control_Hypo	Experimental_Hypo	OK	22.0761	29.0331	0.395211	1.79933	0.00535	0.0267865	yes
XLOC_009597	XLOC_009597	Gm5449	13:53525702-53526059	Control_Hypo	Experimental_Hypo	OK	0.85775	0	#NAME?	#NAME?	0.00915	0.042016	yes
XLOC_009621	XLOC_009621	Prr7	13:55464266-55473155	Control_Hypo	Experimental_Hypo	OK	7.27501	4.77933	-0.60614	-2.0681	0.00195	0.0113736	yes
XLOC_009729	XLOC_009729	Slc6a3	13:73536746-73578672	Control_Hypo	Experimental_Hypo	OK	1.6643	8.12483	2.28742	7.8111	5e-05	0.000434753	yes
XLOC_009769	XLOC_009769	Lysmd3	13:81657805-81671888	Control_Hypo	Experimental_Hypo	OK	2.2644	3.23664	0.515372	1.81893	0.00625	0.0305581	yes
XLOC_009884	XLOC_009884	Elovl7	13:108214403-108287105	Control_Hypo	Experimental_Hypo	OK	2.62651	3.72887	0.505592	2.13869	0.001	0.00637663	yes
XLOC_010120	XLOC_010120	Hist1h4f	13:23551257-23551648	Control_Hypo	Experimental_Hypo	OK	19.0534	27.8483	0.547546	1.72121	0.0102	0.0460195	yes
XLOC_010274	XLOC_010274	Atxn1	13:45549757-45964991	Control_Hypo	Experimental_Hypo	OK	11.0214	14.1398	0.359456	1.65887	0.0099	0.0448848	yes
XLOC_010309	XLOC_010309	Shc3	13:51431040-51567084	Control_Hypo	Experimental_Hypo	OK	25.5077	35.45	0.474853	2.222	0.00085	0.00553519	yes
XLOC_010640	XLOC_010640	Rgs7bp	13:104947152-105054930	Control_Hypo	Experimental_Hypo	OK	12.0336	17.8166	0.566154	2.61365	0.0002	0.00154481	yes
XLOC_010836	XLOC_010836	2810402E24Rik	14:20641008-20644048	Control_Hypo	Experimental_Hypo	OK	1.12283	0.68122	-0.720943	-1.76123	0.0086	0.0399088	yes
XLOC_010884	XLOC_010884	Dnah12	14:26831300-26891703	Control_Hypo	Experimental_Hypo	OK	1.32187	0.76894	-0.781633	-2.2168	0.0009	0.00581278	yes
XLOC_011473	XLOC_011473	Egr3	14:70077444-70080157	Control_Hypo	Experimental_Hypo	OK	1.16647	2.66831	1.19378	2.76142	0.00025	0.00188079	yes
XLOC_011492	XLOC_011492	Gm21750	14:73661224-73662721	Control_Hypo	Experimental_Hypo	OK	18.751	25.7209	0.455974	2.12658	0.00105	0.00665123	yes
XLOC_011594	XLOC_011594	Cldn10	14:118787907-118875489	Control_Hypo	Experimental_Hypo	OK	14.0543	9.33801	-0.589821	-2.52188	5e-05	0.000434753	yes
XLOC_011612	XLOC_011612	Zic2	14:122475434-122479852	Control_Hypo	Experimental_Hypo	OK	4.54579	8.49557	0.902178	2.9791	5e-05	0.000434753	yes
XLOC_011816	XLOC_011816	Prkcd	14:30595355-30626210	Control_Hypo	Experimental_Hypo	OK	4.08949	22.2931	2.4466	5.48109	5e-05	0.000434753	yes
XLOC_011872	XLOC_011872	Sh2d4b	14:40813788-40893266	Control_Hypo	Experimental_Hypo	OK	0.153342	0.636275	2.0529	2.25656	0.0007	0.00467802	yes
XLOC_012005	XLOC_012005	Otx2	14:48657678-48667644	Control_Hypo	Experimental_Hypo	OK	1.45753	3.19319	1.13147	2.14904	0.00025	0.00188079	yes
XLOC_012111	XLOC_012111	Slc7a8	14:54722215-54781886	Control_Hypo	Experimental_Hypo	OK	4.72237	6.69865	0.504361	2.26996	0.0004	0.00285605	yes
XLOC_012172	XLOC_012172	Gjb2	14:57098599-57104702	Control_Hypo	Experimental_Hypo	OK	3.00215	2.03761	-0.55912	-1.77193	0.0066	0.0319756	yes
XLOC_012248	XLOC_012248	Ptk2b	14:66153256-66281052	Control_Hypo	Experimental_Hypo	OK	6.83159	11.3398	0.731097	3.07633	5e-05	0.000434753	yes
XLOC_012343	XLOC_012343	Fam216b	14:78070716-78090786	Control_Hypo	Experimental_Hypo	OK	2.83303	1.57026	-0.851344	-1.67068	0.008	0.0375716	yes
XLOC_012421	XLOC_012421	Slitrk6	14:110748577-110755149	Control_Hypo	Experimental_Hypo	OK	3.45519	5.61055	0.699379	2.90211	5e-05	0.000434753	yes
XLOC_012540	XLOC_012540	Dnah5	15:28203751-28472045	Control_Hypo	Experimental_Hypo	OK	1.83976	1.34604	-0.4508	-2.09617	0.00125	0.00774258	yes
XLOC_012555	XLOC_012555	Erich5	15:34453311-34473892	Control_Hypo	Experimental_Hypo	OK	0.299584	0.771763	1.3652	2.34903	0.00215	0.0123726	yes
XLOC_012558	XLOC_012558	Kcns2	15:34837380-34842337	Control_Hypo	Experimental_Hypo	OK	2.94234	4.29723	0.546441	2.28049	0.0007	0.00467802	yes
XLOC_012594	XLOC_012594	Oxr1	15:41447481-41861048	Control_Hypo	Experimental_Hypo	OK	29.962	41.2326	0.46065	1.9531	0.0028	0.0154813	yes
XLOC_012836	XLOC_012836	Rnu12	15:83149643-83149794	Control_Hypo	Experimental_Hypo	OK	1143.83	2427	1.0853	4.39286	5e-05	0.000434753	yes
XLOC_012907	XLOC_012907	Gm24447	15:93234362-93234700	Control_Hypo	Experimental_Hypo	OK	37.7527	54.6208	0.532869	1.90415	0.0032	0.0173398	yes
XLOC_012940	XLOC_012940	Prph	15:99055173-99058978	Control_Hypo	Experimental_Hypo	OK	5.5164	3.40485	-0.696138	-2.35745	0.00035	0.00253699	yes
XLOC_012981	XLOC_012981	Nr4a1	15:101266845-101274792	Control_Hypo	Experimental_Hypo	OK	4.13374	8.13362	0.97645	3.95171	5e-05	0.000434753	yes
XLOC_013195	XLOC_013195	Enpp2	15:54838897-54920146	Control_Hypo	Experimental_Hypo	OK	60.4832	245.529	2.02129	4.27291	5e-05	0.000434753	yes
XLOC_013202	XLOC_013202	Sntb1	15:55638842-55906949	Control_Hypo	Experimental_Hypo	OK	2.45706	4.28932	0.803814	2.00674	0.00205	0.0118768	yes
XLOC_013275	XLOC_013275	Arc	15:74669082-74672570	Control_Hypo	Experimental_Hypo	OK	6.66829	9.92546	0.573819	2.64008	5e-05	0.000434753	yes
XLOC_013332	XLOC_013332	Scrt1	15:76516202-76522129	Control_Hypo	Experimental_Hypo	OK	9.07798	11.8584	0.385471	1.78097	0.00595	0.0293067	yes
XLOC_013364	XLOC_013364	Pvalb	15:78191113-78206400	Control_Hypo	Experimental_Hypo	OK	12.9075	17.5265	0.441332	1.73014	0.0075	0.0355876	yes
XLOC_013476	XLOC_013476	Celsr1	15:85898757-86033777	Control_Hypo	Experimental_Hypo	OK	1.98938	1.36591	-0.542456	-2.37369	0.0005	0.00348019	yes
XLOC_013541	XLOC_013541	Amigo2	15:97244073-97385689	Control_Hypo	Experimental_Hypo	OK	22.1797	17.0817	-0.376783	-1.68178	0.00825	0.0385281	yes
XLOC_013543	XLOC_013543	Endou	15:97711018-97731405	Control_Hypo	Experimental_Hypo	OK	0.17074	1.24501	2.86628	3.99529	5e-05	0.000434753	yes
XLOC_013566	XLOC_013566	Fkbp11	15:98724372-98728198	Control_Hypo	Experimental_Hypo	OK	3.3323	1.78984	-0.896688	-1.75921	0.0088	0.0406949	yes
XLOC_013638	XLOC_013638	Krt8	15:101996710-102004342	Control_Hypo	Experimental_Hypo	OK	0.394828	1.11064	1.4921	2.5454	0.0006	0.00409089	yes
XLOC_013660	XLOC_013660	Zfp385a	15:103313894-103340086	Control_Hypo	Experimental_Hypo	OK	9.87992	13.0146	0.397563	1.8511	0.00465	0.0237897	yes
XLOC_013692	XLOC_013692	Smim22	16:5007287-5008309	Control_Hypo	Experimental_Hypo	OK	0	1.15998	inf	#NAME?	5e-05	0.000434753	yes
XLOC_013754	XLOC_013754	Gm21897	16:15317457-15318957	Control_Hypo	Experimental_Hypo	OK	33.4598	45.8412	0.454214	2.1212	0.00145	0.00880112	yes
XLOC_013780	XLOC_013780	Ccdc74a	16:17646469-17650738	Control_Hypo	Experimental_Hypo	OK	13.6305	8.93608	-0.609128	-1.81301	0.00455	0.0233511	yes
XLOC_013789	XLOC_013789	Rtn4r	16:18127641-18152408	Control_Hypo	Experimental_Hypo	OK	2.79136	4.59548	0.719249	2.34536	0.0004	0.00285605	yes
XLOC_013873	XLOC_013873	Il1rap	16:26581703-26755502	Control_Hypo	Experimental_Hypo	OK	6.73304	9.1703	0.44571	1.74629	0.00765	0.0361897	yes
XLOC_013923	XLOC_013923	Heg1	16:33684465-33819934	Control_Hypo	Experimental_Hypo	OK	5.70058	8.5081	0.577729	1.90571	0.00105	0.00665123	yes
XLOC_014127	XLOC_014127	Gm21833	16:82828381-82829881	Control_Hypo	Experimental_Hypo	OK	10.7974	14.966	0.471005	2.03839	0.00185	0.0108623	yes
XLOC_014183	XLOC_014183	Kcne2	16:92292388-92298129	Control_Hypo	Experimental_Hypo	OK	0.444441	3.89025	3.1298	5.31284	5e-05	0.000434753	yes
XLOC_014186	XLOC_014186	Clic6	16:92478741-92541243	Control_Hypo	Experimental_Hypo	OK	6.87382	11.5793	0.752366	2.85378	5e-05	0.000434753	yes
XLOC_014204	XLOC_014204	Gm7976	16:95016369-95067017	Control_Hypo	Experimental_Hypo	OK	8.08066	12.7909	0.662575	2.56917	0.00035	0.00253699	yes
XLOC_014429	XLOC_014429	Cldn1	16:26356641-26371841	Control_Hypo	Experimental_Hypo	OK	0.408095	1.27774	1.64662	3.62323	5e-05	0.000434753	yes
XLOC_014599	XLOC_014599	Gm22422	16:56032608-56037819	Control_Hypo	Experimental_Hypo	OK	1691.86	3332.48	0.977984	2.39018	0.00055	0.00378661	yes
XLOC_014605	XLOC_014605	Nit2	16:57156670-57167332	Control_Hypo	Experimental_Hypo	OK	6.03123	4.16343	-0.534678	-1.70352	0.0084	0.0391051	yes
XLOC_014609	XLOC_014609	Col8a1	16:57624257-57754737	Control_Hypo	Experimental_Hypo	OK	1.49392	2.31788	0.633707	2.2907	0.00045	0.00317388	yes
XLOC_014688	XLOC_014688	D16Ertd472e	16:78544011-78576657	Control_Hypo	Experimental_Hypo	OK	2.42909	3.67911	0.598941	1.70657	0.00915	0.042016	yes
XLOC_014742	XLOC_014742	1110004E09Rik	16:90925808-90934927	Control_Hypo	Experimental_Hypo	OK	11.9796	8.8495	-0.436911	-1.54619	0.0111	0.0494223	yes
XLOC_014978	XLOC_014978	Dcpp1,Dcpp2	17:23880875-23900787	Control_Hypo	Experimental_Hypo	OK	10.728	0	#NAME?	#NAME?	5e-05	0.000434753	yes
XLOC_015008	XLOC_015008	Ptx4	17:25120759-25125268	Control_Hypo	Experimental_Hypo	OK	0.998828	0.434451	-1.20104	-2.02064	0.00525	0.0263478	yes
XLOC_015110	XLOC_015110	Glp1r	17:30901866-30936510	Control_Hypo	Experimental_Hypo	OK	5.19485	3.43013	-0.59882	-1.89485	0.0045	0.0231346	yes
XLOC_015501	XLOC_015501	Lama1	17:67697264-67822645	Control_Hypo	Experimental_Hypo	OK	2.15588	1.44418	-0.578026	-2.49691	0.0001	0.000825347	yes
XLOC_015618	XLOC_015618	Adcyap1	17:93199421-93205485	Control_Hypo	Experimental_Hypo	OK	28.5259	20.9325	-0.446529	-2.07119	0.0012	0.00747245	yes
XLOC_015638	XLOC_015638	Tmem181c-ps	17:6612951-6632485	Control_Hypo	Experimental_Hypo	OK	1.10681	2.69101	1.28173	2.76131	0.0002	0.00154481	yes
XLOC_015865	XLOC_015865	Grm4	17:27422386-27513341	Control_Hypo	Experimental_Hypo	OK	9.28713	13.3396	0.52241	1.775	0.00455	0.0233511	yes
XLOC_016055	XLOC_016055	Gm10499	17:36141757-36163176	Control_Hypo	Experimental_Hypo	OK	1.80204	2.86104	0.66691	1.704	0.00765	0.0361897	yes
XLOC_016262	XLOC_016262	Plin5	17:56111600-56117596	Control_Hypo	Experimental_Hypo	OK	1.74126	1.03028	-0.757099	-1.83105	0.00595	0.0293067	yes
XLOC_016392	XLOC_016392	Cdkl4	17:80523549-80563834	Control_Hypo	Experimental_Hypo	OK	2.69238	1.79044	-0.58857	-1.91409	0.0049	0.0248537	yes
XLOC_016523	XLOC_016523	Ttr	18:20558073-20674324	Control_Hypo	Experimental_Hypo	OK	80.8804	1107.87	3.77585	3.55025	0.0022	0.0126201	yes
XLOC_016585	XLOC_016585	Egr1	18:34859822-34864984	Control_Hypo	Experimental_Hypo	OK	4.73505	12.3174	1.37925	5.89248	5e-05	0.000434753	yes
XLOC_016608	XLOC_016608	Vaultrc5	18:36801865-36802008	Control_Hypo	Experimental_Hypo	OK	575.111	1116.91	0.957596	3.38851	5e-05	0.000434753	yes
XLOC_016688	XLOC_016688	Ap3s1	18:46741916-46790826	Control_Hypo	Experimental_Hypo	OK	12.1177	15.8921	0.391202	1.72169	0.0089	0.0410842	yes
XLOC_017149	XLOC_017149	Rps2-ps10	18:61220481-61289924	Control_Hypo	Experimental_Hypo	OK	60.4148	45.1307	-0.420793	-1.96477	0.0019	0.0111185	yes
XLOC_017177	XLOC_017177	Alpk2	18:65265528-65393888	Control_Hypo	Experimental_Hypo	OK	2.84862	4.93299	0.792198	1.86528	0.00535	0.0267865	yes
XLOC_017249	XLOC_017249	Sall3	18:80966375-80988575	Control_Hypo	Experimental_Hypo	OK	3.09934	2.20712	-0.489796	-2.12276	0.0009	0.00581278	yes
XLOC_017273	XLOC_017273	9330132A10Rik	18:89293501-89297229	Control_Hypo	Experimental_Hypo	OK	6.01817	8.40421	0.481787	2.22366	0.0005	0.00348019	yes
XLOC_017383	XLOC_017383	Slc22a8	19:8591253-8611834	Control_Hypo	Experimental_Hypo	OK	3.47923	2.23069	-0.641277	-2.3754	0.0006	0.00409089	yes
XLOC_017384	XLOC_017384	Slc22a6	19:8617995-8628299	Control_Hypo	Experimental_Hypo	OK	1.21423	0.316858	-1.93813	-4.39832	5e-05	0.000434753	yes
XLOC_017393	XLOC_017393	Snord22	19:8725865-8725991	Control_Hypo	Experimental_Hypo	OK	5240.76	15637.2	1.57713	6.59317	5e-05	0.000434753	yes
XLOC_017425	XLOC_017425	Syt7	19:10389089-10453181	Control_Hypo	Experimental_Hypo	OK	12.8229	21.5213	0.74704	3.32459	5e-05	0.000434753	yes
XLOC_017520	XLOC_017520	Aldh1a1	19:20601960-20643462	Control_Hypo	Experimental_Hypo	OK	9.45812	13.8634	0.551658	2.43978	0.0002	0.00154481	yes
XLOC_017708	XLOC_017708	As3mt	19:46707442-46741095	Control_Hypo	Experimental_Hypo	OK	17.5858	12.7205	-0.46725	-2.16406	0.00075	0.00496726	yes
XLOC_017732	XLOC_017732	Dusp5	19:53529108-53542431	Control_Hypo	Experimental_Hypo	OK	0.635828	1.24139	0.965251	2.17976	0.0013	0.0080057	yes
XLOC_017741	XLOC_017741	Tcf7l2	19:55741809-55933654	Control_Hypo	Experimental_Hypo	OK	3.17599	13.4703	2.08451	4.72363	5e-05	0.000434753	yes
XLOC_017748	XLOC_017748	Adrb1	19:56722371-56724862	Control_Hypo	Experimental_Hypo	OK	1.64483	3.09119	0.910225	2.79074	5e-05	0.000434753	yes
XLOC_018146	XLOC_018146	Tll2	19:41083980-41206774	Control_Hypo	Experimental_Hypo	OK	0.837072	0.438658	-0.932256	-2.03831	0.0023	0.0130957	yes
XLOC_018310	XLOC_018310	Ccdc3	2:5137748-5230878	Control_Hypo	Experimental_Hypo	OK	3.4771	2.31641	-0.585998	-1.99837	0.0022	0.0126201	yes
XLOC_018477	XLOC_018477	Pter	2:12924040-13003455	Control_Hypo	Experimental_Hypo	OK	3.49132	5.94768	0.768552	2.85401	5e-05	0.000434753	yes
XLOC_018831	XLOC_018831	Olfml2a	2:38931977-38963753	Control_Hypo	Experimental_Hypo	OK	0.943299	0.528565	-0.835634	-2.34334	0.0004	0.00285605	yes
XLOC_018923	XLOC_018923	Tanc1	2:59612041-59846149	Control_Hypo	Experimental_Hypo	OK	6.99979	10.0426	0.520744	1.54046	0.00505	0.0254967	yes
XLOC_019001	XLOC_019001	Cybrd1	2:71117922-71142926	Control_Hypo	Experimental_Hypo	OK	1.1651	0.796849	-0.54808	-1.6667	0.01015	0.0458211	yes
XLOC_019102	XLOC_019102	Zfp804a	2:82053221-82259879	Control_Hypo	Experimental_Hypo	OK	3.61717	6.01987	0.73487	3.19984	5e-05	0.000434753	yes
XLOC_019353	XLOC_019353	Pax6	2:105536079-105697364	Control_Hypo	Experimental_Hypo	OK	2.06915	3.44202	0.734222	1.37403	0.00455	0.0233511	yes
XLOC_019545	XLOC_019545	Adra2b	2:127363207-127367221	Control_Hypo	Experimental_Hypo	OK	0.110389	0.998686	3.17743	4.77488	5e-05	0.000434753	yes
XLOC_019647	XLOC_019647	Btbd3	2:138256564-138589292	Control_Hypo	Experimental_Hypo	OK	18.9694	24.943	0.394957	1.7464	0.0046	0.0235668	yes
XLOC_019807	XLOC_019807	Bpifa2	2:154008264-154016079	Control_Hypo	Experimental_Hypo	OK	6.75681	0	#NAME?	#NAME?	5e-05	0.000434753	yes
XLOC_019812	XLOC_019812	Bpifb1	2:154190817-154220369	Control_Hypo	Experimental_Hypo	OK	6.94899	0.193267	-5.16814	-6.48032	5e-05	0.000434753	yes
XLOC_019872	XLOC_019872	Lbp	2:158306492-158332852	Control_Hypo	Experimental_Hypo	OK	2.73549	5.96295	1.12423	1.71	0.00175	0.01035	yes
XLOC_019937	XLOC_019937	Wfdc2	2:164562412-164568510	Control_Hypo	Experimental_Hypo	OK	0.57611	2.2398	1.95896	1.33776	0.00105	0.00665123	yes
XLOC_020018	XLOC_020018	Fam210b	2:172345564-172355749	Control_Hypo	Experimental_Hypo	OK	3.72507	4.93895	0.406937	1.70472	0.0096	0.0437389	yes
XLOC_020062	XLOC_020062	Gm6710	2:175869218-175881248	Control_Hypo	Experimental_Hypo	OK	1.32278	2.50489	0.921181	1.81214	0.0031	0.0168727	yes
XLOC_020078	XLOC_020078	Gm14401	2:177074319-177087347	Control_Hypo	Experimental_Hypo	OK	2.387	4.27883	0.842014	1.91707	0.0024	0.0135779	yes
XLOC_020113	XLOC_020113	Col9a3	2:180597789-180642708	Control_Hypo	Experimental_Hypo	OK	6.54107	12.5793	0.943453	2.06804	0.00025	0.00188079	yes
XLOC_020197	XLOC_020197	Itih2	2:10094592-10131396	Control_Hypo	Experimental_Hypo	OK	1.75393	0.698802	-1.32763	-1.89572	0.0003	0.00221024	yes
XLOC_020334	XLOC_020334	Ptgds	2:25466708-25470046	Control_Hypo	Experimental_Hypo	OK	598.614	228.238	-1.39108	-5.72461	5e-05	0.000434753	yes
XLOC_020385	XLOC_020385	Gm25541	2:27539804-27539930	Control_Hypo	Experimental_Hypo	OK	446.82	910.164	1.02643	2.45015	0.0004	0.00285605	yes
XLOC_020531	XLOC_020531	Nr5a1	2:38692655-38720638	Control_Hypo	Experimental_Hypo	OK	4.95822	2.3006	-1.10781	-4.04111	5e-05	0.000434753	yes
XLOC_020590	XLOC_020590	Rprm	2:54084092-54085552	Control_Hypo	Experimental_Hypo	OK	20.3255	14.2339	-0.51396	-2.29582	0.00045	0.00317388	yes
XLOC_021168	XLOC_021168	Chrm5	2:112479170-112480769	Control_Hypo	Experimental_Hypo	OK	9.61772	6.78805	-0.502698	-1.98829	0.00245	0.0138233	yes
XLOC_021197	XLOC_021197	Rasgrp1	2:117279992-117343001	Control_Hypo	Experimental_Hypo	OK	13.5991	21.4049	0.654429	2.63686	5e-05	0.000434753	yes
XLOC_021296	XLOC_021296	Hdc	2:126593666-126619299	Control_Hypo	Experimental_Hypo	OK	18.5964	10.3459	-0.845955	-2.91047	5e-05	0.000434753	yes
XLOC_021304	XLOC_021304	Itpripl1	2:127138771-127143442	Control_Hypo	Experimental_Hypo	OK	0.575942	1.12531	0.966329	2.04526	0.0012	0.00747245	yes
XLOC_021346	XLOC_021346	Pdyn	2:129686564-129699844	Control_Hypo	Experimental_Hypo	OK	16.4298	9.79332	-0.746443	-3.14233	5e-05	0.000434753	yes
XLOC_021355	XLOC_021355	Avp	2:130580619-130582554	Control_Hypo	Experimental_Hypo	OK	554.42	190.856	-1.5385	-5.71699	5e-05	0.000434753	yes
XLOC_021372	XLOC_021372	Adra1d	2:131545849-131563179	Control_Hypo	Experimental_Hypo	OK	0.273442	0.756714	1.46851	2.17932	0.00375	0.0198305	yes
XLOC_021434	XLOC_021434	Snord17	2:144250122-144281227	Control_Hypo	Experimental_Hypo	OK	921.433	1455.17	0.659237	1.8085	0.0067	0.0323673	yes
XLOC_021449	XLOC_021449	Nkx2-4	2:147083315-147085445	Control_Hypo	Experimental_Hypo	OK	2.56353	1.38391	-0.889383	-2.27252	0.0009	0.00581278	yes
XLOC_021553	XLOC_021553	E2f1	2:154559406-154569892	Control_Hypo	Experimental_Hypo	OK	0.388265	0.90008	1.21301	2.47001	0.00095	0.00609393	yes
XLOC_021625	XLOC_021625	D630003M21Rik	2:158182532-158229222	Control_Hypo	Experimental_Hypo	OK	2.84136	2.05598	-0.466757	-1.69437	0.00815	0.0381515	yes
XLOC_021781	XLOC_021781	Pmepa1	2:173224457-173276533	Control_Hypo	Experimental_Hypo	OK	5.2359	8.78104	0.745954	2.10804	0.0011	0.00692755	yes
XLOC_021867	XLOC_021867	Chrna4	2:181018379-181043546	Control_Hypo	Experimental_Hypo	OK	7.19881	12.6968	0.81864	2.97598	5e-05	0.000434753	yes
XLOC_021966	XLOC_021966	Bhlhe22	3:18054173-18057517	Control_Hypo	Experimental_Hypo	OK	0.919328	1.44912	0.656527	1.83054	0.00515	0.0259278	yes
XLOC_022151	XLOC_022151	Gm37746	3:43955720-43955918	Control_Hypo	Experimental_Hypo	OK	13.4774	32.5181	1.2707	2.18376	0.0029	0.015939	yes
XLOC_022289	XLOC_022289	Gm37404	3:62123206-62123565	Control_Hypo	Experimental_Hypo	OK	77.0751	115.996	0.589736	2.60208	5e-05	0.000434753	yes
XLOC_022876	XLOC_022876	Vav3	3:109340652-109685698	Control_Hypo	Experimental_Hypo	OK	2.47849	6.05575	1.28885	2.37827	0.0002	0.00154481	yes
XLOC_022948	XLOC_022948	Abca4	3:122044442-122227370	Control_Hypo	Experimental_Hypo	OK	1.16208	2.81615	1.27701	1.68129	0.00155	0.00932883	yes
XLOC_023040	XLOC_023040	Lef1	3:131109025-131224356	Control_Hypo	Experimental_Hypo	OK	2.89388	5.45093	0.9135	2.03216	0.00295	0.0161704	yes
XLOC_023072	XLOC_023072	Bdh2	3:135281220-135304426	Control_Hypo	Experimental_Hypo	OK	4.10776	2.40614	-0.771632	-1.9811	0.0027	0.0150118	yes
XLOC_023728	XLOC_023728	Shox2	3:66971726-67358396	Control_Hypo	Experimental_Hypo	OK	0.324591	6.22469	4.26131	2.14276	0.0029	0.015939	yes
XLOC_023825	XLOC_023825	Lrat	3:82876704-83015049	Control_Hypo	Experimental_Hypo	OK	0.673181	0.279646	-1.26739	-2.90002	5e-05	0.000434753	yes
XLOC_024156	XLOC_024156	Fam46c	3:100451627-100489324	Control_Hypo	Experimental_Hypo	OK	1.95621	1.07946	-0.857749	-2.19877	0.0001	0.000825347	yes
XLOC_024307	XLOC_024307	Ntng1	3:109780039-110144011	Control_Hypo	Experimental_Hypo	OK	15.6728	30.9601	0.982141	3.50394	5e-05	0.000434753	yes
XLOC_024409	XLOC_024409	Synpo2	3:123076518-123236149	Control_Hypo	Experimental_Hypo	OK	2.03094	9.99722	2.29938	4.1509	5e-05	0.000434753	yes
XLOC_024429	XLOC_024429	RP23-446O11.1	3:125216914-125219553	Control_Hypo	Experimental_Hypo	OK	2.15827	5.21164	1.27186	4.42989	5e-05	0.000434753	yes
XLOC_024638	XLOC_024638	Nexn	3:152236981-152266350	Control_Hypo	Experimental_Hypo	OK	1.92739	4.00059	1.05356	1.47616	0.0012	0.00747245	yes
XLOC_025027	XLOC_025027	Nr4a3	4:48045152-48086447	Control_Hypo	Experimental_Hypo	OK	2.25	4.20529	0.90228	2.52612	0.0005	0.00348019	yes
XLOC_025651	XLOC_025651	Col8a2	4:126286792-126314330	Control_Hypo	Experimental_Hypo	OK	2.10536	3.83494	0.865133	2.62664	5e-05	0.000434753	yes
XLOC_025822	XLOC_025822	Camk2n1	4:138454313-138460123	Control_Hypo	Experimental_Hypo	OK	21.5413	31.2774	0.538017	2.49121	0.00015	0.00118995	yes
XLOC_025974	XLOC_025974	Gm13152	4:147492416-147513486	Control_Hypo	Experimental_Hypo	OK	4.4074	6.3572	0.528463	1.68495	0.0083	0.0387242	yes
XLOC_026089	XLOC_026089	Mxra8	4:155839491-155844088	Control_Hypo	Experimental_Hypo	OK	8.31265	5.61838	-0.565153	-1.59879	0.0089	0.0410842	yes
XLOC_026165	XLOC_026165	Pdp1	4:11958183-11966452	Control_Hypo	Experimental_Hypo	OK	25.5704	39.2879	0.619609	2.63906	5e-05	0.000434753	yes
XLOC_026180	XLOC_026180	Necab1	4:14929907-15149794	Control_Hypo	Experimental_Hypo	OK	10.551	21.3674	1.01803	3.44015	5e-05	0.000434753	yes
XLOC_026384	XLOC_026384	Pax5	4:44524756-44710487	Control_Hypo	Experimental_Hypo	OK	0.11903	0.75013	2.65581	0.422034	5e-05	0.000434753	yes
XLOC_026478	XLOC_026478	Ptpn3	4:57190840-57307305	Control_Hypo	Experimental_Hypo	OK	3.02125	11.5561	1.93543	3.40458	5e-05	0.000434753	yes
XLOC_026554	XLOC_026554	Tnc	4:63959784-64149924	Control_Hypo	Experimental_Hypo	OK	1.7899	1.12114	-0.674912	-2.19184	0.0007	0.00467802	yes
XLOC_026691	XLOC_026691	Caap1	4:94500080-94557078	Control_Hypo	Experimental_Hypo	OK	2.79021	4.16394	0.577578	1.90151	0.00445	0.0229075	yes
XLOC_027085	XLOC_027085	Tinagl1	4:130164453-130175122	Control_Hypo	Experimental_Hypo	OK	1.72519	2.66336	0.626493	1.47358	0.0101	0.0456477	yes
XLOC_027114	XLOC_027114	Snora73b	4:132331918-132353686	Control_Hypo	Experimental_Hypo	OK	1957.52	3563.87	0.864414	1.98591	0.00265	0.0147724	yes
XLOC_027115	XLOC_027115	Phactr4	4:132355922-132422489	Control_Hypo	Experimental_Hypo	OK	2.57773	4.46993	0.794153	1.86688	0.0038	0.0200491	yes
XLOC_027131	XLOC_027131	Gpr3	4:133209339-133224555	Control_Hypo	Experimental_Hypo	OK	1.55562	3.12619	1.00691	2.02785	0.0007	0.00467802	yes
XLOC_027416	XLOC_027416	Ajap1	4:153373220-153482811	Control_Hypo	Experimental_Hypo	OK	10.7231	15.343	0.516864	1.60101	0.01015	0.0458211	yes
XLOC_027434	XLOC_027434	Plch2	4:154983114-155056784	Control_Hypo	Experimental_Hypo	OK	6.95618	9.82516	0.498186	2.05909	0.0007	0.00467802	yes
XLOC_027438	XLOC_027438	Gabrd	4:155384979-155398112	Control_Hypo	Experimental_Hypo	OK	0.836391	4.84599	2.53454	4.59487	5e-05	0.000434753	yes
XLOC_027760	XLOC_027760	Fosl2	5:32135800-32157842	Control_Hypo	Experimental_Hypo	OK	3.61661	6.46226	0.837401	3.35658	5e-05	0.000434753	yes
XLOC_027871	XLOC_027871	Cc2d2a	5:43662345-43740972	Control_Hypo	Experimental_Hypo	OK	7.68825	5.96306	-0.366601	-1.65724	0.0094	0.0429841	yes
XLOC_027940	XLOC_027940	Sod3	5:52363790-52371418	Control_Hypo	Experimental_Hypo	OK	1.34554	2.0396	0.6001	1.92786	0.003	0.0164048	yes
XLOC_028005	XLOC_028005	RP24-447I18.1	5:62428718-62429077	Control_Hypo	Experimental_Hypo	OK	247.758	366.486	0.564826	2.62121	5e-05	0.000434753	yes
XLOC_028445	XLOC_028445	Dr1	5:108268896-108280526	Control_Hypo	Experimental_Hypo	OK	7.29188	9.60094	0.396885	1.6839	0.0061	0.0299196	yes
XLOC_028575	XLOC_028575	Gm24265	5:115489458-115489599	Control_Hypo	Experimental_Hypo	OK	6523.63	17419.6	1.41697	5.72197	5e-05	0.000434753	yes
XLOC_028576	XLOC_028576	Gm24407	5:115490253-115490394	Control_Hypo	Experimental_Hypo	OK	9403.61	25574.3	1.44341	5.47378	5e-05	0.000434753	yes
XLOC_028710	XLOC_028710	RP23-121M13.4	5:123684774-123685306	Control_Hypo	Experimental_Hypo	OK	0.826233	0	#NAME?	#NAME?	5e-05	0.000434753	yes
XLOC_028963	XLOC_028963	Grid2ip	5:143357337-143403748	Control_Hypo	Experimental_Hypo	OK	0.443957	4.57303	3.36466	3.79684	5e-05	0.000434753	yes
XLOC_028964	XLOC_028964	RP23-372N19.2	5:143357337-143403748	Control_Hypo	Experimental_Hypo	OK	0.229576	1.84356	3.00545	3.24894	0.00035	0.00253699	yes
XLOC_029021	XLOC_029021	Rasl11a	5:146845070-146847726	Control_Hypo	Experimental_Hypo	OK	1.06977	2.76922	1.37218	1.98772	0.00115	0.00719815	yes
XLOC_029076	XLOC_029076	Kl	5:150952606-150993817	Control_Hypo	Experimental_Hypo	OK	2.61746	12.309	2.23348	8.37096	5e-05	0.000434753	yes
XLOC_029267	XLOC_029267	Wdr86	5:24711737-24730727	Control_Hypo	Experimental_Hypo	OK	0.533987	1.56789	1.55395	1.58503	0.0005	0.00348019	yes
XLOC_029335	XLOC_029335	Slc30a3	5:31086105-31112526	Control_Hypo	Experimental_Hypo	OK	0.873262	2.50654	1.52121	1.84456	0.00025	0.00188079	yes
XLOC_029422	XLOC_029422	Msx1	5:37820484-37824583	Control_Hypo	Experimental_Hypo	OK	1.32224	2.77315	1.06855	2.82059	5e-05	0.000434753	yes
XLOC_029486	XLOC_029486	RP23-33C9.1	5:45009170-45424402	Control_Hypo	Experimental_Hypo	OK	23.5518	30.7211	0.383391	1.70829	0.0068	0.0327479	yes
XLOC_029553	XLOC_029553	Sel1l3	5:53107082-53213927	Control_Hypo	Experimental_Hypo	OK	4.90295	7.40306	0.594473	2.3013	0.0004	0.00285605	yes
XLOC_029625	XLOC_029625	Rbm47	5:66016548-66191336	Control_Hypo	Experimental_Hypo	OK	0.725633	2.21138	1.60763	1.38899	0.0023	0.0130957	yes
XLOC_029917	XLOC_029917	Rasgef1b	5:99217425-99252927	Control_Hypo	Experimental_Hypo	OK	6.54281	9.49444	0.537171	2.07813	0.0015	0.00906687	yes
XLOC_030014	XLOC_030014	Cplx1	5:108518553-108550024	Control_Hypo	Experimental_Hypo	OK	48.3889	68.1835	0.494746	2.28252	0.00015	0.00118995	yes
XLOC_030104	XLOC_030104	Trpv4	5:114622151-114658421	Control_Hypo	Experimental_Hypo	OK	0.41137	2.29324	2.47888	4.07336	5e-05	0.000434753	yes
XLOC_030144	XLOC_030144	Hspb8	5:116408490-116422864	Control_Hypo	Experimental_Hypo	OK	8.96246	6.61022	-0.439196	-1.76519	0.00645	0.0313746	yes
XLOC_030421	XLOC_030421	Fbxo24,Pcolce	5:137605102-137629002	Control_Hypo	Experimental_Hypo	OK	4.12974	6.91031	0.7427	1.75577	0.00635	0.0309589	yes
XLOC_030499	XLOC_030499	Gm20635	5:143357337-143403748	Control_Hypo	Experimental_Hypo	OK	0.370552	2.13815	2.52861	2.42857	0.0043	0.0222504	yes
XLOC_030573	XLOC_030573	AC122546.1,Gm24105	5:149247949-149248244	Control_Hypo	Experimental_Hypo	OK	0	0.905727	inf	#NAME?	0.00165	0.00984883	yes
XLOC_030630	XLOC_030630	Asb4	6:5383385-5433022	Control_Hypo	Experimental_Hypo	OK	7.85099	5.82565	-0.430456	-1.77822	0.0056	0.027847	yes
XLOC_030661	XLOC_030661	Mdfic	6:15720660-15802169	Control_Hypo	Experimental_Hypo	OK	0.429478	2.10111	2.29049	3.42135	5e-05	0.000434753	yes
XLOC_030750	XLOC_030750	Strip2	6:29917012-29959681	Control_Hypo	Experimental_Hypo	OK	4.9127	7.18595	0.548661	2.41082	0.00035	0.00253699	yes
XLOC_030965	XLOC_030965	Rny3	6:47781623-47781725	Control_Hypo	Experimental_Hypo	OK	2175300	5504170	1.33931	5.25375	5e-05	0.000434753	yes
XLOC_030998	XLOC_030998	Npy	6:49822709-49829507	Control_Hypo	Experimental_Hypo	OK	40.2303	23.3077	-0.787477	-3.15242	5e-05	0.000434753	yes
XLOC_031009	XLOC_031009	Gm27477,Gm27861,Gm27867,Gm27868,Hotairm1	6:52155589-52162267	Control_Hypo	Experimental_Hypo	OK	0.946865	0.0477985	-4.30812	-0.142091	0.0022	0.0126201	yes
XLOC_031035	XLOC_031035	Aqp1	6:55336431-55348555	Control_Hypo	Experimental_Hypo	OK	0.271152	2.83835	3.38788	6.49235	5e-05	0.000434753	yes
XLOC_031267	XLOC_031267	Slc4a5	6:83219827-83304945	Control_Hypo	Experimental_Hypo	OK	0.277814	2.96264	3.41469	2.22031	5e-05	0.000434753	yes
XLOC_031518	XLOC_031518	Slc6a13	6:121300226-121337733	Control_Hypo	Experimental_Hypo	OK	4.55767	1.62085	-1.49155	-3.19877	5e-05	0.000434753	yes
XLOC_031519	XLOC_031519	Slc6a12	6:121343075-121365775	Control_Hypo	Experimental_Hypo	OK	2.22264	0.33588	-2.72626	-1.45618	0.0001	0.000825347	yes
XLOC_031712	XLOC_031712	Slco1c1	6:141524385-141570177	Control_Hypo	Experimental_Hypo	OK	9.07049	12.8512	0.502648	2.17872	0.00055	0.00378661	yes
XLOC_031788	XLOC_031788	Calcr	6:3685676-3764713	Control_Hypo	Experimental_Hypo	OK	8.8374	6.60298	-0.420503	-1.6831	0.00895	0.0412846	yes
XLOC_031876	XLOC_031876	Fezf1	6:23245043-23248362	Control_Hypo	Experimental_Hypo	OK	5.70002	3.42056	-0.736736	-2.77844	5e-05	0.000434753	yes
XLOC_031911	XLOC_031911	Prrt4	6:29169231-29179584	Control_Hypo	Experimental_Hypo	OK	1.86293	1.14065	-0.707722	-2.12599	0.0012	0.00747245	yes
XLOC_032055	XLOC_032055	Rny1	6:47788068-47788180	Control_Hypo	Experimental_Hypo	OK	35814.5	80883.9	1.17531	5.03361	5e-05	0.000434753	yes
XLOC_032081	XLOC_032081	Npvf	6:50650671-50654439	Control_Hypo	Experimental_Hypo	OK	5.3672	1.87188	-1.51968	-3.35744	5e-05	0.000434753	yes
XLOC_032315	XLOC_032315	Gm22486	6:71880647-71908762	Control_Hypo	Experimental_Hypo	OK	4251.69	10654.3	1.32532	2.56657	0.00025	0.00188079	yes
XLOC_032389	XLOC_032389	Egr4	6:85511120-85513589	Control_Hypo	Experimental_Hypo	OK	0.722648	2.27567	1.65492	3.9349	5e-05	0.000434753	yes
XLOC_032467	XLOC_032467	Trh	6:92242060-92244650	Control_Hypo	Experimental_Hypo	OK	48.9857	34.1562	-0.520213	-2.41525	0.00015	0.00118995	yes
XLOC_032564	XLOC_032564	Tmem72	6:116692629-116716913	Control_Hypo	Experimental_Hypo	OK	0.168813	2.97131	4.1376	4.38055	5e-05	0.000434753	yes
XLOC_032573	XLOC_032573	Ret	6:118151747-118197744	Control_Hypo	Experimental_Hypo	OK	6.27892	8.56326	0.447644	2.06141	0.00125	0.00774258	yes
XLOC_032785	XLOC_032785	Mansc1	6:134609209-134632488	Control_Hypo	Experimental_Hypo	OK	0.888413	1.65925	0.901233	2.22584	0.00155	0.00932883	yes
XLOC_032895	XLOC_032895	Prkcg	7:3303531-3331094	Control_Hypo	Experimental_Hypo	OK	13.4095	23.3146	0.797978	3.50519	5e-05	0.000434753	yes
XLOC_033110	XLOC_033110	Gpr4	7:19212537-19224176	Control_Hypo	Experimental_Hypo	OK	1.4238	2.33504	0.713704	2.16735	0.001	0.00637663	yes
XLOC_033117	XLOC_033117	Ercc2	7:19382009-19404104	Control_Hypo	Experimental_Hypo	OK	20869.7	8.89483	-11.1962	-32.7439	5e-05	0.000434753	yes
XLOC_033561	XLOC_033561	Shank1	7:44310252-44358351	Control_Hypo	Experimental_Hypo	OK	35.0611	56.1346	0.679019	1.73839	0.00045	0.00317388	yes
XLOC_033583	XLOC_033583	Slc17a7	7:45163920-45176138	Control_Hypo	Experimental_Hypo	OK	2.61311	5.21353	0.996492	3.67706	5e-05	0.000434753	yes
XLOC_033669	XLOC_033669	Magel2	7:62376978-62381640	Control_Hypo	Experimental_Hypo	OK	13.3037	10.1911	-0.384523	-1.80265	0.0052	0.0261449	yes
XLOC_034177	XLOC_034177	AI467606	7:127091435-127094049	Control_Hypo	Experimental_Hypo	OK	3.57618	2.47165	-0.532944	-1.656	0.01045	0.0469485	yes
XLOC_034262	XLOC_034262	Adgra1	7:139834173-139878088	Control_Hypo	Experimental_Hypo	OK	15.4012	20.9835	0.446217	1.49276	0.0096	0.0437389	yes
XLOC_034398	XLOC_034398	Tnnt1	7:4504569-4516382	Control_Hypo	Experimental_Hypo	OK	0.727687	2.97797	2.03294	1.53804	5e-05	0.000434753	yes
XLOC_034596	XLOC_034596	Vmn1r90	7:14530651-14622479	Control_Hypo	Experimental_Hypo	OK	13.599	19.0436	0.485806	1.99294	0.00275	0.01525	yes
XLOC_034680	XLOC_034680	Fosb	7:19302720-19310045	Control_Hypo	Experimental_Hypo	OK	0.841297	2.2528	1.42104	4.24044	5e-05	0.000434753	yes
XLOC_034853	XLOC_034853	Dll3	7:28293552-28302238	Control_Hypo	Experimental_Hypo	OK	1.06401	0.543084	-0.97026	-1.44477	0.0084	0.0391051	yes
XLOC_035153	XLOC_035153	Grin2d	7:45831882-45870928	Control_Hypo	Experimental_Hypo	OK	5.31253	6.78814	0.353618	1.63304	0.00975	0.0443123	yes
XLOC_035156	XLOC_035156	Emp3	7:45918022-45921426	Control_Hypo	Experimental_Hypo	OK	2.52346	0.981355	-1.36255	-2.18625	0.00165	0.00984883	yes
XLOC_035498	XLOC_035498	Mef2a	7:67231162-67372858	Control_Hypo	Experimental_Hypo	OK	15.7701	22.4863	0.511857	1.65755	0.0067	0.0323673	yes
XLOC_035518	XLOC_035518	Mctp2	7:72077829-72306595	Control_Hypo	Experimental_Hypo	OK	0.389103	0.94063	1.27347	3.31837	5e-05	0.000434753	yes
XLOC_035533	XLOC_035533	Sv2b	7:75114896-75331419	Control_Hypo	Experimental_Hypo	OK	12.3679	16.5194	0.417559	1.9277	0.0023	0.0130957	yes
XLOC_035731	XLOC_035731	Folr1	7:101858330-101870788	Control_Hypo	Experimental_Hypo	OK	1.65942	13.4222	3.01587	2.99173	5e-05	0.000434753	yes
XLOC_035788	XLOC_035788	Hbb-bt	7:103812523-103813996	Control_Hypo	Experimental_Hypo	OK	21.846	4.93212	-2.14709	-6.41679	5e-05	0.000434753	yes
XLOC_035789	XLOC_035789	Hbb-bs	7:103826533-103828096	Control_Hypo	Experimental_Hypo	OK	466.72	153.68	-1.60262	-6.8531	5e-05	0.000434753	yes
XLOC_035926	XLOC_035926	Nrip3	7:109758054-109782025	Control_Hypo	Experimental_Hypo	OK	21.3089	29.6592	0.47702	2.22576	0.0005	0.00348019	yes
XLOC_035928	XLOC_035928	Scube2	7:109798675-109865679	Control_Hypo	Experimental_Hypo	OK	0.443051	0.958346	1.11307	1.72539	0.00165	0.00984883	yes
XLOC_035942	XLOC_035942	Dkk3	7:112116018-112159057	Control_Hypo	Experimental_Hypo	OK	19.1121	14.9068	-0.358522	-1.68725	0.00925	0.0423983	yes
XLOC_036140	XLOC_036140	Ebf3	7:137193672-137314445	Control_Hypo	Experimental_Hypo	OK	4.63811	3.45342	-0.425513	-1.802	0.00425	0.022041	yes
XLOC_036219	XLOC_036219	Igf2	7:142650765-142670356	Control_Hypo	Experimental_Hypo	OK	12.3701	24.094	0.961814	2.77892	5e-05	0.000434753	yes
XLOC_036232	XLOC_036232	Cdkn1c	7:143458349-143461050	Control_Hypo	Experimental_Hypo	OK	2.00688	3.25474	0.69759	2.02973	0.00235	0.0133425	yes
XLOC_036456	XLOC_036456	Zmat4	8:23636018-24156585	Control_Hypo	Experimental_Hypo	OK	9.92049	16.8952	0.768134	1.80294	0.00365	0.0193807	yes
XLOC_036513	XLOC_036513	Dusp4	8:34807296-34819894	Control_Hypo	Experimental_Hypo	OK	2.49426	3.56205	0.5141	1.79303	0.0066	0.0319756	yes
XLOC_036741	XLOC_036741	Frem3	8:80611079-80695356	Control_Hypo	Experimental_Hypo	OK	1.09785	1.60939	0.551825	1.96298	0.0032	0.0173398	yes
XLOC_036832	XLOC_036832	Nkd1	8:88521343-88594887	Control_Hypo	Experimental_Hypo	OK	2.18177	3.03012	0.473877	1.80474	0.0055	0.0274201	yes
XLOC_036876	XLOC_036876	Drc7	8:95055102-95078141	Control_Hypo	Experimental_Hypo	OK	1.83455	3.28096	0.838688	2.73521	5e-05	0.000434753	yes
XLOC_036937	XLOC_036937	Fam65a	8:105566323-105682922	Control_Hypo	Experimental_Hypo	OK	10.5159	66.9057	2.66956	10.2531	5e-05	0.000434753	yes
XLOC_036960	XLOC_036960	Cdh1	8:106603350-106670246	Control_Hypo	Experimental_Hypo	OK	0.693538	0.253165	-1.4539	-1.88022	0.00325	0.0175643	yes
XLOC_036991	XLOC_036991	Hydin	8:110265247-110610253	Control_Hypo	Experimental_Hypo	OK	1.49664	1.10667	-0.435501	-1.95964	0.0024	0.0135779	yes
XLOC_037057	XLOC_037057	Kcnk1	8:125995101-126030683	Control_Hypo	Experimental_Hypo	OK	10.0437	13.0065	0.372948	1.73662	0.00805	0.0377781	yes
XLOC_037254	XLOC_037254	Snord13	8:31149863-31149967	Control_Hypo	Experimental_Hypo	OK	2445.36	7896.67	1.6912	1.98729	0.00915	0.042016	yes
XLOC_037555	XLOC_037555	Junb	8:84976908-84978748	Control_Hypo	Experimental_Hypo	OK	9.50366	14.3612	0.595622	2.66572	0.00015	0.00118995	yes
XLOC_037729	XLOC_037729	Il34	8:110741828-110807477	Control_Hypo	Experimental_Hypo	OK	17.8032	12.2943	-0.534144	-1.78609	0.0048	0.0244327	yes
XLOC_037786	XLOC_037786	Pgbd5	8:124369048-124439658	Control_Hypo	Experimental_Hypo	OK	13.9815	18.6026	0.411981	1.75454	0.00575	0.0284944	yes
XLOC_037866	XLOC_037866	Gpr83	9:14860209-14870789	Control_Hypo	Experimental_Hypo	OK	9.63516	7.33798	-0.392926	-1.80094	0.005	0.0252887	yes
XLOC_038105	XLOC_038105	Zfp202	9:40192315-40213604	Control_Hypo	Experimental_Hypo	OK	2.85776	1.99377	-0.519388	-1.83778	0.0049	0.0248537	yes
XLOC_038152	XLOC_038152	Scn4b	9:45138436-45154152	Control_Hypo	Experimental_Hypo	OK	2.40343	3.40783	0.50376	2.07175	0.0015	0.00906687	yes
XLOC_038200	XLOC_038200	Exph5	9:53301669-53377514	Control_Hypo	Experimental_Hypo	OK	0.81538	1.20702	0.56591	1.627	0.01075	0.0480791	yes
XLOC_038311	XLOC_038311	Parp16	9:65214689-65239219	Control_Hypo	Experimental_Hypo	OK	1.5685	0.946902	-0.728097	-1.85143	0.0059	0.0291076	yes
XLOC_038332	XLOC_038332	Car12	9:66713685-66766845	Control_Hypo	Experimental_Hypo	OK	1.96541	6.74977	1.78001	4.23958	5e-05	0.000434753	yes
XLOC_038358	XLOC_038358	Aldh1a2	9:71215788-71296243	Control_Hypo	Experimental_Hypo	OK	2.74812	1.53446	-0.840716	-2.4278	0.00025	0.00188079	yes
XLOC_038501	XLOC_038501	Gm26461	9:88548019-88571061	Control_Hypo	Experimental_Hypo	OK	448.453	640.432	0.514089	1.88717	0.00335	0.0180342	yes
XLOC_038654	XLOC_038654	Cpne4	9:104547285-105034544	Control_Hypo	Experimental_Hypo	OK	6.06088	11.2687	0.894727	2.33048	0.0018	0.0106044	yes
XLOC_038830	XLOC_038830	Eomes	9:118478211-118486132	Control_Hypo	Experimental_Hypo	OK	0.635497	0.30752	-1.0472	-1.86251	0.0026	0.0145401	yes
XLOC_038933	XLOC_038933	1700012B09Rik	9:14756586-14771030	Control_Hypo	Experimental_Hypo	OK	3.47165	1.73257	-1.00271	-1.40661	0.0057	0.0282782	yes
XLOC_038980	XLOC_038980	Col5a3	9:20770049-20815067	Control_Hypo	Experimental_Hypo	OK	1.33594	0.936992	-0.51175	-1.66446	0.01055	0.0472959	yes
XLOC_039051	XLOC_039051	Adamts15	9:30899154-30922452	Control_Hypo	Experimental_Hypo	OK	1.64106	2.2665	0.46584	1.80363	0.0052	0.0261449	yes
XLOC_039105	XLOC_039105	Slc37a2	9:37229148-37255738	Control_Hypo	Experimental_Hypo	OK	0.917177	1.44103	0.651829	1.65029	0.01075	0.0480791	yes
XLOC_039257	XLOC_039257	AI593442	9:52673043-52679429	Control_Hypo	Experimental_Hypo	OK	9.02831	14.1673	0.650032	2.99544	5e-05	0.000434753	yes
XLOC_039287	XLOC_039287	Lingo1	9:56618474-56685253	Control_Hypo	Experimental_Hypo	OK	12.6098	17.1048	0.439853	1.96845	0.0018	0.0106044	yes
XLOC_039307	XLOC_039307	Islr	9:58156264-58159221	Control_Hypo	Experimental_Hypo	OK	4.42403	2.57668	-0.779847	-2.60676	0.00015	0.00118995	yes
XLOC_039389	XLOC_039389	Foxb1	9:69757709-69830845	Control_Hypo	Experimental_Hypo	OK	3.34311	2.05106	-0.704818	-1.97069	0.00235	0.0133425	yes
XLOC_039404	XLOC_039404	Cgnl1	9:71626508-71771602	Control_Hypo	Experimental_Hypo	OK	3.9008	5.60695	0.523446	1.54059	0.01125	0.0499794	yes
XLOC_039556	XLOC_039556	Ankrd34c	9:89725238-89738475	Control_Hypo	Experimental_Hypo	OK	2.37646	4.15639	0.806519	2.74436	5e-05	0.000434753	yes
XLOC_039572	XLOC_039572	Zic1	9:91358057-91389348	Control_Hypo	Experimental_Hypo	OK	8.78978	17.5555	0.998023	2.65597	0.00055	0.00378661	yes
XLOC_039637	XLOC_039637	Esyt3	9:99307582-99358557	Control_Hypo	Experimental_Hypo	OK	7.34016	5.11522	-0.521014	-1.63818	0.009	0.0414631	yes
XLOC_039874	XLOC_039874	Cck	9:121489824-121495689	Control_Hypo	Experimental_Hypo	OK	13.0161	35.1924	1.43497	5.3247	5e-05	0.000434753	yes
XLOC_040277	XLOC_040277	mt-Tp	MT:15355-15422	Control_Hypo	Experimental_Hypo	OK	0	301951	inf	#NAME?	0.0047	0.0239971	yes
XLOC_040600	XLOC_040600	Prr32	X:45090903-45092791	Control_Hypo	Experimental_Hypo	OK	0.202185	0.857755	2.08489	1.95642	0.00965	0.0439347	yes
XLOC_040695	XLOC_040695	Brs3	X:57043073-57048758	Control_Hypo	Experimental_Hypo	OK	1.44072	0.916898	-0.651957	-1.68718	0.0103	0.0463783	yes
XLOC_040782	XLOC_040782	Gpr50	X:71663666-71669257	Control_Hypo	Experimental_Hypo	OK	4.64607	2.56519	-0.856942	-2.04846	0.0013	0.0080057	yes
XLOC_040975	XLOC_040975	Zxdb	X:94724568-94730187	Control_Hypo	Experimental_Hypo	OK	1.69768	2.35971	0.475047	1.82964	0.00515	0.0259278	yes
XLOC_041142	XLOC_041142	4933403O08Rik	X:112239048-112243852	Control_Hypo	Experimental_Hypo	OK	3.38076	2.12844	-0.667554	-1.68127	0.0107	0.0478777	yes
XLOC_041326	XLOC_041326	Cldn2	X:139800827-139811386	Control_Hypo	Experimental_Hypo	OK	0.261222	2.46156	3.23623	2.17161	5e-05	0.000434753	yes
XLOC_041933	XLOC_041933	Igsf1	X:49782535-49797749	Control_Hypo	Experimental_Hypo	OK	30.9822	23.5365	-0.396539	-1.63165	0.00775	0.0365685	yes
XLOC_042026	XLOC_042026	Cdr1	X:61183245-61185558	Control_Hypo	Experimental_Hypo	OK	14.4536	28.5636	0.982756	4.58237	5e-05	0.000434753	yes
XLOC_042185	XLOC_042185	Prrg1	X:78449612-78583896	Control_Hypo	Experimental_Hypo	OK	2.01502	3.03371	0.59029	1.39408	0.00985	0.0447019	yes
XLOC_042337	XLOC_042337	Cited1	X:102247380-102252181	Control_Hypo	Experimental_Hypo	OK	13.8712	8.98101	-0.627139	-2.13259	0.0008	0.00525136	yes
XLOC_042523	XLOC_042523	Sytl4	X:133936384-133981812	Control_Hypo	Experimental_Hypo	OK	10.9257	7.3535	-0.571229	-1.93459	0.0023	0.0130957	yes
XLOC_042613	XLOC_042613	Irs4	X:141710997-141726163	Control_Hypo	Experimental_Hypo	OK	19.12	14.2758	-0.421511	-1.91713	0.0021	0.0121275	yes
XLOC_042758	XLOC_042758	Cdkl5	X:160768012-160994704	Control_Hypo	Experimental_Hypo	OK	9.29164	12.7845	0.460393	1.63999	0.0074	0.0351869	yes
