# Supplementary material for: Early life stressful experiences escalate aggressive behavior in adulthood via changes in transthyretin expression and function
Source: eLife. 2022 Oct 13;11:e77968. doi: 10.7554/eLife.77968 (PMC9633068; doi:10.7554/eLife.77968)
Supplement: Supplementary file 2. [file elife-77968-supp2.xlsx]

## Sheet: ANOVA-Fig 3B
Table Analyzed	Fig 3B- Ttr mRNA levels in Ctrl vs SEagg/SNagg Male and Female
Three-way ANOVA	Ordinary
Alpha	0.05
Source of Variation	% of total variation	P value	P value summary	Significant?
Brain Region	54.97	<0.0001	****	Yes
Sex	18.39	<0.0001	****	Yes
Treatment	2.831	<0.0001	****	Yes
Brain Region x Sex	0.7582	<0.0001	****	Yes
Brain Region x Treatment	0.03916	0.2462	ns	No
Sex x Treatment	0.8023	<0.0001	****	Yes
Brain Region x Sex x Treatment	19.68	<0.0001	****	Yes
ANOVA table	SS	DF	MS	F (DFn, DFd)	P value
Brain Region	401	1	401	F (1, 88) = 1913	P<0.0001
Sex	134.2	1	134.2	F (1, 88) = 640.3	P<0.0001
Treatment	20.65	1	20.65	F (1, 88) = 98.53	P<0.0001
Brain Region x Sex	5.531	1	5.531	F (1, 88) = 26.39	P<0.0001
Brain Region x Treatment	0.2857	1	0.2857	F (1, 88) = 1.363	P=0.2462
Sex x Treatment	5.853	1	5.853	F (1, 88) = 27.93	P<0.0001
Brain Region x Sex x Treatment	143.6	1	143.6	F (1, 88) = 685.0	P<0.0001
Residual	18.44	88	0.2096
Bonferroni's multiple comparisons test	Mean Diff.	95.00% CI of diff.	Below threshold?	Summary	Adjusted P Value
Hypo:Ctrl-Male vs. Hypo:SEagg-Male	-2.121	-2.723 to -1.519	Yes	****	<0.0001
Hypo:Ctrl-Male vs. Hypo:Ctrl-Female	-0.095	-0.6971 to 0.5071	No	ns	>0.9999
Hypo:Ctrl-Male vs. Hypo:SNagg-Female	3.663	3.061 to 4.265	Yes	****	<0.0001
Hypo:Ctrl-Male vs. PFC:Ctrl-Male	-6.162	-6.764 to -5.560	Yes	****	<0.0001
Hypo:Ctrl-Male vs. PFC:SEagg-Male	-3.174	-3.776 to -2.571	Yes	****	<0.0001
Hypo:Ctrl-Male vs. PFC:Ctrl-Female	-2.326	-2.928 to -1.724	Yes	****	<0.0001
Hypo:Ctrl-Male vs. PFC:SNagg-Female	-3.241	-3.843 to -2.639	Yes	****	<0.0001
Hypo:SEagg-Male vs. Hypo:Ctrl-Female	2.026	1.424 to 2.628	Yes	****	<0.0001
Hypo:SEagg-Male vs. Hypo:SNagg-Female	5.784	5.182 to 6.386	Yes	****	<0.0001
Hypo:SEagg-Male vs. PFC:Ctrl-Male	-4.041	-4.643 to -3.439	Yes	****	<0.0001
Hypo:SEagg-Male vs. PFC:SEagg-Male	-1.053	-1.655 to -0.4504	Yes	****	<0.0001
Hypo:SEagg-Male vs. PFC:Ctrl-Female	-0.2047	-0.8069 to 0.3974	No	ns	>0.9999
Hypo:SEagg-Male vs. PFC:SNagg-Female	-1.12	-1.722 to -0.5179	Yes	****	<0.0001
Hypo:Ctrl-Female vs. Hypo:SNagg-Female	3.758	3.156 to 4.360	Yes	****	<0.0001
Hypo:Ctrl-Female vs. PFC:Ctrl-Male	-6.067	-6.669 to -5.465	Yes	****	<0.0001
Hypo:Ctrl-Female vs. PFC:SEagg-Male	-3.079	-3.681 to -2.476	Yes	****	<0.0001
Hypo:Ctrl-Female vs. PFC:Ctrl-Female	-2.231	-2.833 to -1.629	Yes	****	<0.0001
Hypo:Ctrl-Female vs. PFC:SNagg-Female	-3.146	-3.748 to -2.544	Yes	****	<0.0001
Hypo:SNagg-Female vs. PFC:Ctrl-Male	-9.825	-10.43 to -9.223	Yes	****	<0.0001
Hypo:SNagg-Female vs. PFC:SEagg-Male	-6.837	-7.439 to -6.235	Yes	****	<0.0001
Hypo:SNagg-Female vs. PFC:Ctrl-Female	-5.989	-6.591 to -5.387	Yes	****	<0.0001
Hypo:SNagg-Female vs. PFC:SNagg-Female	-6.904	-7.506 to -6.302	Yes	****	<0.0001
PFC:Ctrl-Male vs. PFC:SEagg-Male	2.989	2.386 to 3.591	Yes	****	<0.0001
PFC:Ctrl-Male vs. PFC:Ctrl-Female	3.836	3.234 to 4.439	Yes	****	<0.0001
PFC:Ctrl-Male vs. PFC:SNagg-Female	2.921	2.319 to 3.523	Yes	****	<0.0001
PFC:SEagg-Male vs. PFC:Ctrl-Female	0.8478	0.2456 to 1.450	Yes	***	0.0005
PFC:SEagg-Male vs. PFC:SNagg-Female	-0.0675	-0.6696 to 0.5346	No	ns	>0.9999
PFC:Ctrl-Female vs. PFC:SNagg-Female	-0.9153	-1.517 to -0.3131	Yes	***	0.0001
Test details	Mean 1	Mean 2	Mean Diff.	SE of diff.	N1	N2	t	DF
Hypo:Ctrl-Male vs. Hypo:SEagg-Male	5.493	7.614	-2.121	0.1869	12	12	11.35	88
Hypo:Ctrl-Male vs. Hypo:Ctrl-Female	5.493	5.588	-0.095	0.1869	12	12	0.5083	88
Hypo:Ctrl-Male vs. Hypo:SNagg-Female	5.493	1.83	3.663	0.1869	12	12	19.6	88
Hypo:Ctrl-Male vs. PFC:Ctrl-Male	5.493	11.66	-6.162	0.1869	12	12	32.97	88
Hypo:Ctrl-Male vs. PFC:SEagg-Male	5.493	8.667	-3.174	0.1869	12	12	16.98	88
Hypo:Ctrl-Male vs. PFC:Ctrl-Female	5.493	7.819	-2.326	0.1869	12	12	12.45	88
Hypo:Ctrl-Male vs. PFC:SNagg-Female	5.493	8.734	-3.241	0.1869	12	12	17.34	88
Hypo:SEagg-Male vs. Hypo:Ctrl-Female	7.614	5.588	2.026	0.1869	12	12	10.84	88
Hypo:SEagg-Male vs. Hypo:SNagg-Female	7.614	1.83	5.784	0.1869	12	12	30.95	88
Hypo:SEagg-Male vs. PFC:Ctrl-Male	7.614	11.66	-4.041	0.1869	12	12	21.62	88
Hypo:SEagg-Male vs. PFC:SEagg-Male	7.614	8.667	-1.053	0.1869	12	12	5.632	88
Hypo:SEagg-Male vs. PFC:Ctrl-Female	7.614	7.819	-0.2047	0.1869	12	12	1.095	88
Hypo:SEagg-Male vs. PFC:SNagg-Female	7.614	8.734	-1.12	0.1869	12	12	5.993	88
Hypo:Ctrl-Female vs. Hypo:SNagg-Female	5.588	1.83	3.758	0.1869	12	12	20.11	88
Hypo:Ctrl-Female vs. PFC:Ctrl-Male	5.588	11.66	-6.067	0.1869	12	12	32.46	88
Hypo:Ctrl-Female vs. PFC:SEagg-Male	5.588	8.667	-3.079	0.1869	12	12	16.47	88
Hypo:Ctrl-Female vs. PFC:Ctrl-Female	5.588	7.819	-2.231	0.1869	12	12	11.94	88
Hypo:Ctrl-Female vs. PFC:SNagg-Female	5.588	8.734	-3.146	0.1869	12	12	16.83	88
Hypo:SNagg-Female vs. PFC:Ctrl-Male	1.83	11.66	-9.825	0.1869	12	12	52.57	88
Hypo:SNagg-Female vs. PFC:SEagg-Male	1.83	8.667	-6.837	0.1869	12	12	36.58	88
Hypo:SNagg-Female vs. PFC:Ctrl-Female	1.83	7.819	-5.989	0.1869	12	12	32.05	88
Hypo:SNagg-Female vs. PFC:SNagg-Female	1.83	8.734	-6.904	0.1869	12	12	36.94	88
PFC:Ctrl-Male vs. PFC:SEagg-Male	11.66	8.667	2.989	0.1869	12	12	15.99	88
PFC:Ctrl-Male vs. PFC:Ctrl-Female	11.66	7.819	3.836	0.1869	12	12	20.53	88
PFC:Ctrl-Male vs. PFC:SNagg-Female	11.66	8.734	2.921	0.1869	12	12	15.63	88
PFC:SEagg-Male vs. PFC:Ctrl-Female	8.667	7.819	0.8478	0.1869	12	12	4.536	88
PFC:SEagg-Male vs. PFC:SNagg-Female	8.667	8.734	-0.0675	0.1869	12	12	0.3612	88
PFC:Ctrl-Female vs. PFC:SNagg-Female	7.819	8.734	-0.9153	0.1869	12	12	4.897	88
Table Analyzed	Ttr mRNA- Ctrl vs SEagg male
Two-way ANOVA	Ordinary
Alpha	0.05
Source of Variation	% of total variation	P value	P value summary	Significant?
Interaction	32.04	<0.0001	****	Yes
Brain Region	63.88	<0.0001	****	Yes
Treatment	0.9236	0.0008	***	Yes
ANOVA table	SS	DF	MS	F (DFn, DFd)	P value
Interaction	78.33	1	78.33	F (1, 44) = 447.3	P<0.0001
Brain Region	156.2	1	156.2	F (1, 44) = 891.7	P<0.0001
Treatment	2.258	1	2.258	F (1, 44) = 12.89	P=0.0008
Residual	7.706	44	0.1751
Difference between column means
Mean of Ctrl-Male	8.574
Mean of SEagg-Male	8.14
Difference between means	0.4337
SE of difference	0.1208
95% CI of difference	0.1903 to 0.6772
Difference between row means
Mean of Hypo	6.554
Mean of PFC	10.16
Difference between means	-3.607
SE of difference	0.1208
95% CI of difference	-3.851 to -3.364
Interaction CI
Mean diff, A1 - B1	-2.121
Mean diff, A2 - B2	2.989
(A1 -B1) - (A2 - B2)	-5.11
95% CI of difference	-5.597 to -4.623
(B1 - A1) - (B2 - A2)	5.11
95% CI of difference	4.623 to 5.597
Data summary
Number of columns (Treatment)	2
Number of rows (Brain Region)	2
Number of values	48
Bonferroni's multiple comparisons test	Mean Diff.	95.00% CI of diff.	Below threshold?	Summary	Adjusted P Value
Hypo:Ctrl-Male vs. Hypo:SEagg-Male	-2.121	-2.593 to -1.649	Yes	****	<0.0001
Hypo:Ctrl-Male vs. PFC:Ctrl-Male	-6.162	-6.634 to -5.690	Yes	****	<0.0001
Hypo:Ctrl-Male vs. PFC:SEagg-Male	-3.174	-3.646 to -2.702	Yes	****	<0.0001
Hypo:SEagg-Male vs. PFC:Ctrl-Male	-4.041	-4.513 to -3.569	Yes	****	<0.0001
Hypo:SEagg-Male vs. PFC:SEagg-Male	-1.053	-1.525 to -0.5805	Yes	****	<0.0001
PFC:Ctrl-Male vs. PFC:SEagg-Male	2.989	2.517 to 3.461	Yes	****	<0.0001
Test details	Mean 1	Mean 2	Mean Diff.	SE of diff.	N1	N2	t	DF
Hypo:Ctrl-Male vs. Hypo:SEagg-Male	5.493	7.614	-2.121	0.1708	12	12	12.42	44
Hypo:Ctrl-Male vs. PFC:Ctrl-Male	5.493	11.66	-6.162	0.1708	12	12	36.07	44
Hypo:Ctrl-Male vs. PFC:SEagg-Male	5.493	8.667	-3.174	0.1708	12	12	18.58	44
Hypo:SEagg-Male vs. PFC:Ctrl-Male	7.614	11.66	-4.041	0.1708	12	12	23.65	44
Hypo:SEagg-Male vs. PFC:SEagg-Male	7.614	8.667	-1.053	0.1708	12	12	6.161	44
PFC:Ctrl-Male vs. PFC:SEagg-Male	11.66	8.667	2.989	0.1708	12	12	17.49	44
Table Analyzed	Ttr mRNA Ctrl vs SNagg Female
Two-way ANOVA	Ordinary
Alpha	0.05
Source of Variation	% of total variation	P value	P value summary	Significant?
Interaction	18.67	<0.0001	****	Yes
Brain Region	71.35	<0.0001	****	Yes
Treatment	6.91	<0.0001	****	Yes
ANOVA table	SS	DF	MS	F (DFn, DFd)	P value
Interaction	65.52	1	65.52	F (1, 44) = 268.5	P<0.0001
Brain Region	250.3	1	250.3	F (1, 44) = 1026	P<0.0001
Treatment	24.24	1	24.24	F (1, 44) = 99.36	P<0.0001
Residual	10.74	44	0.244
Difference between column means
Mean of Ctrl-Female	6.703
Mean of SNagg-Female	5.282
Difference between means	1.421
SE of difference	0.1426
95% CI of difference	1.134 to 1.709
Difference between row means
Mean of Hypo	3.709
Mean of PFC	8.277
Difference between means	-4.567
SE of difference	0.1426
95% CI of difference	-4.855 to -4.280
Interaction CI
Mean diff, A1 - B1	3.758
Mean diff, A2 - B2	-0.9153
(A1 -B1) - (A2 - B2)	4.673
95% CI of difference	4.099 to 5.248
(B1 - A1) - (B2 - A2)	-4.673
95% CI of difference	-5.248 to -4.099
Data summary
Number of columns (Treatment)	2
Number of rows (Brain Region)	2
Number of values	48
Bonferroni's multiple comparisons test	Mean Diff.	95.00% CI of diff.	Below threshold?	Summary	Adjusted P Value
Hypo:Ctrl-Female vs. Hypo:SNagg-Female	3.758	3.201 to 4.315	Yes	****	<0.0001
Hypo:Ctrl-Female vs. PFC:Ctrl-Female	-2.231	-2.788 to -1.674	Yes	****	<0.0001
Hypo:Ctrl-Female vs. PFC:SNagg-Female	-3.146	-3.703 to -2.589	Yes	****	<0.0001
Hypo:SNagg-Female vs. PFC:Ctrl-Female	-5.989	-6.546 to -5.432	Yes	****	<0.0001
Hypo:SNagg-Female vs. PFC:SNagg-Female	-6.904	-7.461 to -6.347	Yes	****	<0.0001
PFC:Ctrl-Female vs. PFC:SNagg-Female	-0.9153	-1.472 to -0.3581	Yes	***	0.0003
Test details	Mean 1	Mean 2	Mean Diff.	SE of diff.	N1	N2	t	DF
Hypo:Ctrl-Female vs. Hypo:SNagg-Female	5.588	1.83	3.758	0.2017	12	12	18.64	44
Hypo:Ctrl-Female vs. PFC:Ctrl-Female	5.588	7.819	-2.231	0.2017	12	12	11.06	44
Hypo:Ctrl-Female vs. PFC:SNagg-Female	5.588	8.734	-3.146	0.2017	12	12	15.6	44
Hypo:SNagg-Female vs. PFC:Ctrl-Female	1.83	7.819	-5.989	0.2017	12	12	29.7	44
Hypo:SNagg-Female vs. PFC:SNagg-Female	1.83	8.734	-6.904	0.2017	12	12	34.24	44
PFC:Ctrl-Female vs. PFC:SNagg-Female	7.819	8.734	-0.9153	0.2017	12	12	4.539	44

## Sheet: ANOVA-Fig 3C
Table Analyzed	Fig 3C- Ttr mRNA levels in NS vs PPS mice
Three-way ANOVA	Ordinary
Alpha	0.05
Source of Variation	% of total variation	P value	P value summary	Significant?
Brain Region	42.12	<0.0001	****	Yes
Sex	19.77	<0.0001	****	Yes
Treatment	6.799	<0.0001	****	Yes
Brain Region x Sex	4.763	<0.0001	****	Yes
Brain Region x Treatment	0.2392	0.0102	*	Yes
Sex x Treatment	0.04745	0.2452	ns	No
Brain Region x Sex x Treatment	23.22	<0.0001	****	Yes
ANOVA table	SS	DF	MS	F (DFn, DFd)	P value
Brain Region	305.7	1	305.7	F (1, 88) = 1215	P<0.0001
Sex	143.5	1	143.5	F (1, 88) = 570.1	P<0.0001
Treatment	49.35	1	49.35	F (1, 88) = 196.1	P<0.0001
Brain Region x Sex	34.57	1	34.57	F (1, 88) = 137.4	P<0.0001
Brain Region x Treatment	1.736	1	1.736	F (1, 88) = 6.898	P=0.0102
Sex x Treatment	0.3444	1	0.3444	F (1, 88) = 1.368	P=0.2452
Brain Region x Sex x Treatment	168.5	1	168.5	F (1, 88) = 669.5	P<0.0001
Residual	22.15	88	0.2517
Bonferroni's multiple comparisons test	Mean Diff.	95.00% CI of diff.	Below threshold?	Summary	Adjusted P Value
Hypo:NS-Male vs. Hypo:PPS-Male	-1.365	-2.025 to -0.7051	Yes	****	<0.0001
Hypo:NS-Male vs. Hypo:NS-Female	-3.775	-4.435 to -3.115	Yes	****	<0.0001
Hypo:NS-Male vs. Hypo:PPS-Female	-0.08	-0.7399 to 0.5799	No	ns	>0.9999
Hypo:NS-Male vs. PFC:NS-Male	-5.288	-5.947 to -4.628	Yes	****	<0.0001
Hypo:NS-Male vs. PFC:PPS-Male	-0.815	-1.475 to -0.1551	Yes	**	0.004
Hypo:NS-Male vs. PFC:NS-Female	-6.163	-6.823 to -5.503	Yes	****	<0.0001
Hypo:NS-Male vs. PFC:PPS-Female	-7.23	-7.890 to -6.570	Yes	****	<0.0001
Hypo:PPS-Male vs. Hypo:NS-Female	-2.41	-3.070 to -1.750	Yes	****	<0.0001
Hypo:PPS-Male vs. Hypo:PPS-Female	1.285	0.6251 to 1.945	Yes	****	<0.0001
Hypo:PPS-Male vs. PFC:NS-Male	-3.923	-4.582 to -3.263	Yes	****	<0.0001
Hypo:PPS-Male vs. PFC:PPS-Male	0.55	-0.1099 to 1.210	No	ns	0.2424
Hypo:PPS-Male vs. PFC:NS-Female	-4.798	-5.458 to -4.138	Yes	****	<0.0001
Hypo:PPS-Male vs. PFC:PPS-Female	-5.865	-6.525 to -5.205	Yes	****	<0.0001
Hypo:NS-Female vs. Hypo:PPS-Female	3.695	3.035 to 4.355	Yes	****	<0.0001
Hypo:NS-Female vs. PFC:NS-Male	-1.513	-2.172 to -0.8526	Yes	****	<0.0001
Hypo:NS-Female vs. PFC:PPS-Male	2.96	2.300 to 3.620	Yes	****	<0.0001
Hypo:NS-Female vs. PFC:NS-Female	-2.388	-3.048 to -1.728	Yes	****	<0.0001
Hypo:NS-Female vs. PFC:PPS-Female	-3.455	-4.115 to -2.795	Yes	****	<0.0001
Hypo:PPS-Female vs. PFC:NS-Male	-5.208	-5.867 to -4.548	Yes	****	<0.0001
Hypo:PPS-Female vs. PFC:PPS-Male	-0.735	-1.395 to -0.07511	Yes	*	0.0153
Hypo:PPS-Female vs. PFC:NS-Female	-6.083	-6.743 to -5.423	Yes	****	<0.0001
Hypo:PPS-Female vs. PFC:PPS-Female	-7.15	-7.810 to -6.490	Yes	****	<0.0001
PFC:NS-Male vs. PFC:PPS-Male	4.473	3.813 to 5.132	Yes	****	<0.0001
PFC:NS-Male vs. PFC:NS-Female	-0.8758	-1.536 to -0.2159	Yes	**	0.0013
PFC:NS-Male vs. PFC:PPS-Female	-1.943	-2.602 to -1.283	Yes	****	<0.0001
PFC:PPS-Male vs. PFC:NS-Female	-5.348	-6.008 to -4.688	Yes	****	<0.0001
PFC:PPS-Male vs. PFC:PPS-Female	-6.415	-7.075 to -5.755	Yes	****	<0.0001
PFC:NS-Female vs. PFC:PPS-Female	-1.067	-1.727 to -0.4068	Yes	****	<0.0001
Test details	Mean 1	Mean 2	Mean Diff.	SE of diff.	N1	N2	t	DF
Hypo:NS-Male vs. Hypo:PPS-Male	2.902	4.267	-1.365	0.2048	12	12	6.665	88
Hypo:NS-Male vs. Hypo:NS-Female	2.902	6.677	-3.775	0.2048	12	12	18.43	88
Hypo:NS-Male vs. Hypo:PPS-Female	2.902	2.982	-0.08	0.2048	12	12	0.3906	88
Hypo:NS-Male vs. PFC:NS-Male	2.902	8.189	-5.288	0.2048	12	12	25.82	88
Hypo:NS-Male vs. PFC:PPS-Male	2.902	3.717	-0.815	0.2048	12	12	3.979	88
Hypo:NS-Male vs. PFC:NS-Female	2.902	9.065	-6.163	0.2048	12	12	30.09	88
Hypo:NS-Male vs. PFC:PPS-Female	2.902	10.13	-7.23	0.2048	12	12	35.3	88
Hypo:PPS-Male vs. Hypo:NS-Female	4.267	6.677	-2.41	0.2048	12	12	11.77	88
Hypo:PPS-Male vs. Hypo:PPS-Female	4.267	2.982	1.285	0.2048	12	12	6.274	88
Hypo:PPS-Male vs. PFC:NS-Male	4.267	8.189	-3.923	0.2048	12	12	19.15	88
Hypo:PPS-Male vs. PFC:PPS-Male	4.267	3.717	0.55	0.2048	12	12	2.685	88
Hypo:PPS-Male vs. PFC:NS-Female	4.267	9.065	-4.798	0.2048	12	12	23.43	88
Hypo:PPS-Male vs. PFC:PPS-Female	4.267	10.13	-5.865	0.2048	12	12	28.64	88
Hypo:NS-Female vs. Hypo:PPS-Female	6.677	2.982	3.695	0.2048	12	12	18.04	88
Hypo:NS-Female vs. PFC:NS-Male	6.677	8.189	-1.513	0.2048	12	12	7.385	88
Hypo:NS-Female vs. PFC:PPS-Male	6.677	3.717	2.96	0.2048	12	12	14.45	88
Hypo:NS-Female vs. PFC:NS-Female	6.677	9.065	-2.388	0.2048	12	12	11.66	88
Hypo:NS-Female vs. PFC:PPS-Female	6.677	10.13	-3.455	0.2048	12	12	16.87	88
Hypo:PPS-Female vs. PFC:NS-Male	2.982	8.189	-5.208	0.2048	12	12	25.43	88
Hypo:PPS-Female vs. PFC:PPS-Male	2.982	3.717	-0.735	0.2048	12	12	3.589	88
Hypo:PPS-Female vs. PFC:NS-Female	2.982	9.065	-6.083	0.2048	12	12	29.7	88
Hypo:PPS-Female vs. PFC:PPS-Female	2.982	10.13	-7.15	0.2048	12	12	34.91	88
PFC:NS-Male vs. PFC:PPS-Male	8.189	3.717	4.473	0.2048	12	12	21.84	88
PFC:NS-Male vs. PFC:NS-Female	8.189	9.065	-0.8758	0.2048	12	12	4.276	88
PFC:NS-Male vs. PFC:PPS-Female	8.189	10.13	-1.943	0.2048	12	12	9.484	88
PFC:PPS-Male vs. PFC:NS-Female	3.717	9.065	-5.348	0.2048	12	12	26.11	88
PFC:PPS-Male vs. PFC:PPS-Female	3.717	10.13	-6.415	0.2048	12	12	31.32	88
PFC:NS-Female vs. PFC:PPS-Female	9.065	10.13	-1.067	0.2048	12	12	5.208	88
Table Analyzed	Ttr mRNA NS vs PPS male
Two-way ANOVA	Ordinary
Alpha	0.05
Source of Variation	% of total variation	P value	P value summary	Significant?
Interaction	47.64	<0.0001	****	Yes
Brain Region	31.38	<0.0001	****	Yes
Treatment	13.5	<0.0001	****	Yes
ANOVA table	SS	DF	MS	F (DFn, DFd)	P value
Interaction	102.2	1	102.2	F (1, 44) = 280.4	P<0.0001
Brain Region	67.33	1	67.33	F (1, 44) = 184.6	P<0.0001
Treatment	28.97	1	28.97	F (1, 44) = 79.45	P<0.0001
Residual	16.04	44	0.3646
Difference between column means
Mean of NS-Male	5.545
Mean of PPS-Male	3.992
Difference between means	1.554
SE of difference	0.1743
95% CI of difference	1.202 to 1.905
Difference between row means
Mean of Hypo	3.584
Mean of PFC	5.953
Difference between means	-2.369
SE of difference	0.1743
95% CI of difference	-2.720 to -2.017
Interaction CI
Mean diff, A1 - B1	-1.365
Mean diff, A2 - B2	4.473
(A1 -B1) - (A2 - B2)	-5.838
95% CI of difference	-6.540 to -5.135
(B1 - A1) - (B2 - A2)	5.838
95% CI of difference	5.135 to 6.540
Data summary
Number of columns (Treatment)	2
Number of rows (Brain Region)	2
Number of values	48
Bonferroni's multiple comparisons test	Mean Diff.	95.00% CI of diff.	Below threshold?	Summary	Adjusted P Value
Hypo:NS-Male vs. Hypo:PPS-Male	-1.365	-2.046 to -0.6839	Yes	****	<0.0001
Hypo:NS-Male vs. PFC:NS-Male	-5.288	-5.969 to -4.606	Yes	****	<0.0001
Hypo:NS-Male vs. PFC:PPS-Male	-0.815	-1.496 to -0.1339	Yes	*	0.0113
Hypo:PPS-Male vs. PFC:NS-Male	-3.923	-4.604 to -3.241	Yes	****	<0.0001
Hypo:PPS-Male vs. PFC:PPS-Male	0.55	-0.1311 to 1.231	No	ns	0.185
PFC:NS-Male vs. PFC:PPS-Male	4.473	3.791 to 5.154	Yes	****	<0.0001
Test details	Mean 1	Mean 2	Mean Diff.	SE of diff.	N1	N2	t	DF
Hypo:NS-Male vs. Hypo:PPS-Male	2.902	4.267	-1.365	0.2465	12	12	5.537	44
Hypo:NS-Male vs. PFC:NS-Male	2.902	8.189	-5.288	0.2465	12	12	21.45	44
Hypo:NS-Male vs. PFC:PPS-Male	2.902	3.717	-0.815	0.2465	12	12	3.306	44
Hypo:PPS-Male vs. PFC:NS-Male	4.267	8.189	-3.923	0.2465	12	12	15.91	44
Hypo:PPS-Male vs. PFC:PPS-Male	4.267	3.717	0.55	0.2465	12	12	2.231	44
PFC:NS-Male vs. PFC:PPS-Male	8.189	3.717	4.473	0.2465	12	12	18.14	44
Table Analyzed	Ttr mRNA NS vs PPS Female
Two-way ANOVA	Ordinary
Alpha	0.05
Source of Variation	% of total variation	P value	P value summary	Significant?
Interaction	18.49	<0.0001	****	Yes
Brain Region	74.21	<0.0001	****	Yes
Treatment	5.635	<0.0001	****	Yes
ANOVA table	SS	DF	MS	F (DFn, DFd)	P value
Interaction	68.02	1	68.02	F (1, 44) = 490.3	P<0.0001
Brain Region	272.9	1	272.9	F (1, 44) = 1967	P<0.0001
Treatment	20.72	1	20.72	F (1, 44) = 149.4	P<0.0001
Residual	6.104	44	0.1387
Difference between column means
Mean of NS-Female	7.871
Mean of PPS-Female	6.557
Difference between means	1.314
SE of difference	0.1075
95% CI of difference	1.097 to 1.531
Difference between row means
Mean of Hypo	4.829
Mean of PFC	9.598
Difference between means	-4.769
SE of difference	0.1075
95% CI of difference	-4.986 to -4.552
Interaction CI
Mean diff, A1 - B1	3.695
Mean diff, A2 - B2	-1.067
(A1 -B1) - (A2 - B2)	4.762
95% CI of difference	4.328 to 5.195
(B1 - A1) - (B2 - A2)	-4.762
95% CI of difference	-5.195 to -4.328
Data summary
Number of columns (Treatment)	2
Number of rows (Brain Region)	2
Number of values	48
Bonferroni's multiple comparisons test	Mean Diff.	95.00% CI of diff.	Below threshold?	Summary	Adjusted P Value
Hypo:NS-Female vs. Hypo:PPS-Female	3.695	3.275 to 4.115	Yes	****	<0.0001
Hypo:NS-Female vs. PFC:NS-Female	-2.388	-2.808 to -1.968	Yes	****	<0.0001
Hypo:NS-Female vs. PFC:PPS-Female	-3.455	-3.875 to -3.035	Yes	****	<0.0001
Hypo:PPS-Female vs. PFC:NS-Female	-6.083	-6.503 to -5.663	Yes	****	<0.0001
Hypo:PPS-Female vs. PFC:PPS-Female	-7.15	-7.570 to -6.730	Yes	****	<0.0001
PFC:NS-Female vs. PFC:PPS-Female	-1.067	-1.487 to -0.6466	Yes	****	<0.0001
Test details	Mean 1	Mean 2	Mean Diff.	SE of diff.	N1	N2	t	DF
Hypo:NS-Female vs. Hypo:PPS-Female	6.677	2.982	3.695	0.1521	12	12	24.3	44
Hypo:NS-Female vs. PFC:NS-Female	6.677	9.065	-2.388	0.1521	12	12	15.71	44
Hypo:NS-Female vs. PFC:PPS-Female	6.677	10.13	-3.455	0.1521	12	12	22.72	44
Hypo:PPS-Female vs. PFC:NS-Female	2.982	9.065	-6.083	0.1521	12	12	40.01	44
Hypo:PPS-Female vs. PFC:PPS-Female	2.982	10.13	-7.15	0.1521	12	12	47.02	44
PFC:NS-Female vs. PFC:PPS-Female	9.065	10.13	-1.067	0.1521	12	12	7.015	44

## Sheet: ANOVA-Fig 3D
Table Analyzed	Fig 3D- Ttr Protein levels in Ctrl vs Seagg male
Two-way ANOVA	Ordinary
Alpha	0.05
Source of Variation	% of total variation	P value	P value summary	Significant?
Interaction	53.33	<0.0001	****	Yes
Brain Region	35.94	<0.0001	****	Yes
Treatment	6.006	0.0128	*	Yes
ANOVA table	SS	DF	MS	F (DFn, DFd)	P value
Interaction	84.19	1	84.19	F (1, 8) = 90.32	P<0.0001
Brain Region	56.74	1	56.74	F (1, 8) = 60.87	P<0.0001
Treatment	9.481	1	9.481	F (1, 8) = 10.17	P=0.0128
Residual	7.457	8	0.9322
Difference between column means
Mean of Ctrl	17.54
Mean of SEagg	15.76
Difference between means	1.778
SE of difference	0.5574
95% CI of difference	0.4923 to 3.063
Difference between row means
Mean of Hypo	14.48
Mean of PFC	18.82
Difference between means	-4.349
SE of difference	0.5574
95% CI of difference	-5.635 to -3.064
Interaction CI
Mean diff, A1 - B1	7.075
Mean diff, A2 - B2	-3.52
(A1 -B1) - (A2 - B2)	10.6
95% CI of difference	8.024 to 13.17
(B1 - A1) - (B2 - A2)	-10.6
95% CI of difference	-13.17 to -8.024
Data summary
Number of columns (Treatment)	2
Number of rows (Brain Region)	2
Number of values	12
Bonferroni's multiple comparisons test	Mean Diff.	95.00% CI of diff.	Below threshold?	Summary	Adjusted P Value
Hypo:Ctrl vs. Hypo:SEagg	7.075	4.333 to 9.818	Yes	***	0.0001
Hypo:Ctrl vs. PFC:Ctrl	0.9485	-1.794 to 3.691	No	ns	>0.9999
Hypo:Ctrl vs. PFC:SEagg	-2.571	-5.314 to 0.1711	No	ns	0.069
Hypo:SEagg vs. PFC:Ctrl	-6.127	-8.869 to -3.384	Yes	***	0.0003
Hypo:SEagg vs. PFC:SEagg	-9.647	-12.39 to -6.904	Yes	****	<0.0001
PFC:Ctrl vs. PFC:SEagg	-3.52	-6.262 to -0.7774	Yes	*	0.0126
Test details	Mean 1	Mean 2	Mean Diff.	SE of diff.	N1	N2	t	DF
Hypo:Ctrl vs. Hypo:SEagg	18.01	10.94	7.075	0.7883	3	3	8.975	8
Hypo:Ctrl vs. PFC:Ctrl	18.01	17.06	0.9485	0.7883	3	3	1.203	8
Hypo:Ctrl vs. PFC:SEagg	18.01	20.58	-2.571	0.7883	3	3	3.262	8
Hypo:SEagg vs. PFC:Ctrl	10.94	17.06	-6.127	0.7883	3	3	7.772	8
Hypo:SEagg vs. PFC:SEagg	10.94	20.58	-9.647	0.7883	3	3	12.24	8
PFC:Ctrl vs. PFC:SEagg	17.06	20.58	-3.52	0.7883	3	3	4.465	8

## Sheet: ANOVA-Fig 4F
Table Analyzed	Fig 4F-T4 brain content in Ctrl vs SEagg male
Two-way ANOVA	Ordinary
Alpha	0.05
Source of Variation	% of total variation	P value	P value summary	Significant?
Interaction	94.5	<0.0001	****	Yes
Brain Region	0.2485	0.3155	ns	No
Treatment	1.553	0.0197	*	Yes
ANOVA table	SS	DF	MS	F (DFn, DFd)	P value
Interaction	0.7605	1	0.7605	F (1, 16) = 408.3	P<0.0001
Brain Region	0.002	1	0.002	F (1, 16) = 1.074	P=0.3155
Treatment	0.0125	1	0.0125	F (1, 16) = 6.711	P=0.0197
Residual	0.0298	16	0.001863
Difference between column means
Mean of Ctrl	0.555
Mean of SEagg	0.605
Difference between means	-0.05
SE of difference	0.0193
95% CI of difference	-0.09091 to -0.009085
Difference between row means
Mean of Hypo	0.59
Mean of PFC	0.57
Difference between means	0.02
SE of difference	0.0193
95% CI of difference	-0.02091 to 0.06091
Interaction CI
Mean diff, A1 - B1	0.34
Mean diff, A2 - B2	-0.44
(A1 -B1) - (A2 - B2)	0.78
95% CI of difference	0.6982 to 0.8618
(B1 - A1) - (B2 - A2)	-0.78
95% CI of difference	-0.8618 to -0.6982
Data summary
Number of columns (Treatment)	2
Number of rows (Brain Region)	2
Number of values	20
Bonferroni's multiple comparisons test	Mean Diff.	95.00% CI of diff.	Below threshold?	Summary	Adjusted P Value
Hypo:Ctrl vs. Hypo:SEagg	0.34	0.2579 to 0.4221	Yes	****	<0.0001
Hypo:Ctrl vs. PFC:Ctrl	0.41	0.3279 to 0.4921	Yes	****	<0.0001
Hypo:Ctrl vs. PFC:SEagg	-0.03	-0.1121 to 0.05211	No	ns	>0.9999
Hypo:SEagg vs. PFC:Ctrl	0.07	-0.01211 to 0.1521	No	ns	0.1247
Hypo:SEagg vs. PFC:SEagg	-0.37	-0.4521 to -0.2879	Yes	****	<0.0001
PFC:Ctrl vs. PFC:SEagg	-0.44	-0.5221 to -0.3579	Yes	****	<0.0001
Test details	Mean 1	Mean 2	Mean Diff.	SE of diff.	N1	N2	t	DF
Hypo:Ctrl vs. Hypo:SEagg	0.76	0.42	0.34	0.02729	5	5	12.46	16
Hypo:Ctrl vs. PFC:Ctrl	0.76	0.35	0.41	0.02729	5	5	15.02	16
Hypo:Ctrl vs. PFC:SEagg	0.76	0.79	-0.03	0.02729	5	5	1.099	16
Hypo:SEagg vs. PFC:Ctrl	0.42	0.35	0.07	0.02729	5	5	2.565	16
Hypo:SEagg vs. PFC:SEagg	0.42	0.79	-0.37	0.02729	5	5	13.56	16
PFC:Ctrl vs. PFC:SEagg	0.35	0.79	-0.44	0.02729	5	5	16.12	16

## Sheet: ANOVA-Fig4G
Table Analyzed	Fig 4G- T3 brain content in Ctrl vs SEagg male
Two-way ANOVA	Ordinary
Alpha	0.05
Source of Variation	% of total variation	P value	P value summary	Significant?
Interaction	26.97	<0.0001	****	Yes
Brain Region	57.4	<0.0001	****	Yes
Treatment	13.48	<0.0001	****	Yes
ANOVA table	SS	DF	MS	F (DFn, DFd)	P value
Interaction	0.001748	1	0.001748	F (1, 16) = 200.5	P<0.0001
Brain Region	0.003721	1	0.003721	F (1, 16) = 426.7	P<0.0001
Treatment	0.0008738	1	0.0008738	F (1, 16) = 100.2	P<0.0001
Residual	0.0001395	16	8.72e-06
Difference between column means
Mean of Ctrl	0.02701
Mean of SEagg	0.01379
Difference between means	0.01322
SE of difference	0.001321
95% CI of difference	0.01042 to 0.01602
Difference between row means
Mean of Hypo	0.03404
Mean of PFC	0.00676
Difference between means	0.02728
SE of difference	0.001321
95% CI of difference	0.02448 to 0.03008
Interaction CI
Mean diff, A1 - B1	0.03192
Mean diff, A2 - B2	-0.00548
(A1 -B1) - (A2 - B2)	0.0374
95% CI of difference	0.03180 to 0.04300
(B1 - A1) - (B2 - A2)	-0.0374
95% CI of difference	-0.04300 to -0.03180
Data summary
Number of columns (Treatment)	2
Number of rows (Brain Region)	2
Number of values	20
Bonferroni's multiple comparisons test	Mean Diff.	95.00% CI of diff.	Below threshold?	Summary	Adjusted P Value
Hypo:Ctrl vs. Hypo:SEagg	0.03192	0.02630 to 0.03754	Yes	****	<0.0001
Hypo:Ctrl vs. PFC:Ctrl	0.04598	0.04036 to 0.05160	Yes	****	<0.0001
Hypo:Ctrl vs. PFC:SEagg	0.0405	0.03488 to 0.04612	Yes	****	<0.0001
Hypo:SEagg vs. PFC:Ctrl	0.01406	0.008442 to 0.01968	Yes	****	<0.0001
Hypo:SEagg vs. PFC:SEagg	0.00858	0.002962 to 0.01420	Yes	**	0.0018
PFC:Ctrl vs. PFC:SEagg	-0.00548	-0.01110 to 0.0001383	No	ns	0.0583
Test details	Mean 1	Mean 2	Mean Diff.	SE of diff.	N1	N2	t	DF
Hypo:Ctrl vs. Hypo:SEagg	0.05	0.01808	0.03192	0.001868	5	5	17.09	16
Hypo:Ctrl vs. PFC:Ctrl	0.05	0.00402	0.04598	0.001868	5	5	24.62	16
Hypo:Ctrl vs. PFC:SEagg	0.05	0.0095	0.0405	0.001868	5	5	21.69	16
Hypo:SEagg vs. PFC:Ctrl	0.01808	0.00402	0.01406	0.001868	5	5	7.528	16
Hypo:SEagg vs. PFC:SEagg	0.01808	0.0095	0.00858	0.001868	5	5	4.594	16
PFC:Ctrl vs. PFC:SEagg	0.00402	0.0095	-0.00548	0.001868	5	5	2.934	16

## Sheet: ANOVA-Fig 4H
Table Analyzed	Fig 4H- T4 brain content in NS vs PPS male
Two-way ANOVA	Ordinary
Alpha	0.05
Source of Variation	% of total variation	P value	P value summary	Significant?
Interaction	21.24	<0.0001	****	Yes
Brain Region	71.95	<0.0001	****	Yes
Treatment	6.531	<0.0001	****	Yes
ANOVA table	SS	DF	MS	F (DFn, DFd)	P value
Interaction	2.003	1	2.003	F (1, 16) = 1209	P<0.0001
Brain Region	6.786	1	6.786	F (1, 16) = 4097	P<0.0001
Treatment	0.616	1	0.616	F (1, 16) = 371.9	P<0.0001
Residual	0.0265	16	0.001657
Difference between column means
Mean of NS	1.101
Mean of PPS	0.75
Difference between means	0.351
SE of difference	0.0182
95% CI of difference	0.3124 to 0.3896
Difference between row means
Mean of Hypo	1.508
Mean of PFC	0.343
Difference between means	1.165
SE of difference	0.0182
95% CI of difference	1.126 to 1.204
Interaction CI
Mean diff, A1 - B1	0.984
Mean diff, A2 - B2	-0.282
(A1 -B1) - (A2 - B2)	1.266
95% CI of difference	1.189 to 1.343
(B1 - A1) - (B2 - A2)	-1.266
95% CI of difference	-1.343 to -1.189
Data summary
Number of columns (Treatment)	2
Number of rows (Brain Region)	2
Number of values	20
Bonferroni's multiple comparisons test	Mean Diff.	95.00% CI of diff.	Below threshold?	Summary	Adjusted P Value
Hypo:NS vs. Hypo:PPS	0.984	0.9066 to 1.061	Yes	****	<0.0001
Hypo:NS vs. PFC:NS	1.798	1.721 to 1.875	Yes	****	<0.0001
Hypo:NS vs. PFC:PPS	1.516	1.439 to 1.593	Yes	****	<0.0001
Hypo:PPS vs. PFC:NS	0.814	0.7366 to 0.8914	Yes	****	<0.0001
Hypo:PPS vs. PFC:PPS	0.532	0.4546 to 0.6094	Yes	****	<0.0001
PFC:NS vs. PFC:PPS	-0.282	-0.3594 to -0.2046	Yes	****	<0.0001
Test details	Mean 1	Mean 2	Mean Diff.	SE of diff.	N1	N2	t	DF
Hypo:NS vs. Hypo:PPS	2	1.016	0.984	0.02574	5	5	38.23	16
Hypo:NS vs. PFC:NS	2	0.202	1.798	0.02574	5	5	69.85	16
Hypo:NS vs. PFC:PPS	2	0.484	1.516	0.02574	5	5	58.89	16
Hypo:PPS vs. PFC:NS	1.016	0.202	0.814	0.02574	5	5	31.62	16
Hypo:PPS vs. PFC:PPS	1.016	0.484	0.532	0.02574	5	5	20.67	16
PFC:NS vs. PFC:PPS	0.202	0.484	-0.282	0.02574	5	5	10.96	16

## Sheet: ANOVA-Fig4I
Table Analyzed	Fig 4I- T3 brain content in NS vs PPS male
Two-way ANOVA	Ordinary
Alpha	0.05
Source of Variation	% of total variation	P value	P value summary	Significant?
Interaction	62.01	<0.0001	****	Yes
Brain Region	27.83	<0.0001	****	Yes
Treatment	4.916	0.0014	**	Yes
ANOVA table	SS	DF	MS	F (DFn, DFd)	P value
Interaction	0.0001326	1	0.0001326	F (1, 16) = 189.1	P<0.0001
Brain Region	5.951e-05	1	5.951e-05	F (1, 16) = 84.87	P<0.0001
Treatment	1.051e-05	1	1.051e-05	F (1, 16) = 14.99	P=0.0014
Residual	1.122e-05	16	7.013e-07
Difference between column means
Mean of NS	0.0093
Mean of PPS	0.00785
Difference between means	0.00145
SE of difference	0.0003745
95% CI of difference	0.0006561 to 0.002244
Difference between row means
Mean of Hypo	0.0103
Mean of PFC	0.00685
Difference between means	0.00345
SE of difference	0.0003745
95% CI of difference	0.002656 to 0.004244
Interaction CI
Mean diff, A1 - B1	0.0066
Mean diff, A2 - B2	-0.0037
(A1 -B1) - (A2 - B2)	0.0103
95% CI of difference	0.008712 to 0.01189
(B1 - A1) - (B2 - A2)	-0.0103
95% CI of difference	-0.01189 to -0.008712
Data summary
Number of columns (Treatment)	2
Number of rows (Brain Region)	2
Number of values	20
Bonferroni's multiple comparisons test	Mean Diff.	95.00% CI of diff.	Below threshold?	Summary	Adjusted P Value
Hypo:NS vs. Hypo:PPS	0.0066	0.005007 to 0.008193	Yes	****	<0.0001
Hypo:NS vs. PFC:NS	0.0086	0.007007 to 0.01019	Yes	****	<0.0001
Hypo:NS vs. PFC:PPS	0.0049	0.003307 to 0.006493	Yes	****	<0.0001
Hypo:PPS vs. PFC:NS	0.002	0.0004067 to 0.003593	Yes	**	0.0099
Hypo:PPS vs. PFC:PPS	-0.0017	-0.003293 to -0.0001067	Yes	*	0.0328
PFC:NS vs. PFC:PPS	-0.0037	-0.005293 to -0.002107	Yes	****	<0.0001
Test details	Mean 1	Mean 2	Mean Diff.	SE of diff.	N1	N2	t	DF
Hypo:NS vs. Hypo:PPS	0.0136	0.007	0.0066	0.0005296	5	5	12.46	16
Hypo:NS vs. PFC:NS	0.0136	0.005	0.0086	0.0005296	5	5	16.24	16
Hypo:NS vs. PFC:PPS	0.0136	0.0087	0.0049	0.0005296	5	5	9.252	16
Hypo:PPS vs. PFC:NS	0.007	0.005	0.002	0.0005296	5	5	3.776	16
Hypo:PPS vs. PFC:PPS	0.007	0.0087	-0.0017	0.0005296	5	5	3.21	16
PFC:NS vs. PFC:PPS	0.005	0.0087	-0.0037	0.0005296	5	5	6.986	16

## Sheet: ANOVA-Fig4J
Table Analyzed	Fig 4J- Trh mRNA levels in Ctrl vs SEagg male
Two-way ANOVA	Ordinary
Alpha	0.05
Source of Variation	% of total variation	P value	P value summary	Significant?
Interaction	29.31	<0.0001	****	Yes
Brain Region	25.98	<0.0001	****	Yes
Treatment	41.4	<0.0001	****	Yes
ANOVA table	SS	DF	MS	F (DFn, DFd)	P value
Interaction	10.14	1	10.14	F (1, 32) = 282.9	P<0.0001
Brain Region	8.99	1	8.99	F (1, 32) = 250.7	P<0.0001
Treatment	14.33	1	14.33	F (1, 32) = 399.6	P<0.0001
Residual	1.147	32	0.03586
Difference between column means
Mean of Ctrl	5.244
Mean of SEagg	3.983
Difference between means	1.262
SE of difference	0.06312
95% CI of difference	1.133 to 1.390
Difference between row means
Mean of Hypo	4.114
Mean of PFC	5.113
Difference between means	-0.9994
SE of difference	0.06312
95% CI of difference	-1.128 to -0.8709
Interaction CI
Mean diff, A1 - B1	2.323
Mean diff, A2 - B2	0.2
(A1 -B1) - (A2 - B2)	2.123
95% CI of difference	1.866 to 2.380
(B1 - A1) - (B2 - A2)	-2.123
95% CI of difference	-2.380 to -1.866
Data summary
Number of columns (Treatment)	2
Number of rows (Brain Region)	2
Number of values	36
Bonferroni's multiple comparisons test	Mean Diff.	95.00% CI of diff.	Below threshold?	Summary	Adjusted P Value
Hypo:Ctrl vs. Hypo:SEagg	2.323	2.072 to 2.574	Yes	****	<0.0001
Hypo:Ctrl vs. PFC:Ctrl	0.06222	-0.1888 to 0.3133	No	ns	>0.9999
Hypo:Ctrl vs. PFC:SEagg	0.2622	0.01118 to 0.5133	Yes	*	0.0365
Hypo:SEagg vs. PFC:Ctrl	-2.261	-2.512 to -2.010	Yes	****	<0.0001
Hypo:SEagg vs. PFC:SEagg	-2.061	-2.312 to -1.810	Yes	****	<0.0001
PFC:Ctrl vs. PFC:SEagg	0.2	-0.05104 to 0.4510	No	ns	0.1927
Test details	Mean 1	Mean 2	Mean Diff.	SE of diff.	N1	N2	t	DF
Hypo:Ctrl vs. Hypo:SEagg	5.276	2.952	2.323	0.08926	9	9	26.03	32
Hypo:Ctrl vs. PFC:Ctrl	5.276	5.213	0.06222	0.08926	9	9	0.6971	32
Hypo:Ctrl vs. PFC:SEagg	5.276	5.013	0.2622	0.08926	9	9	2.938	32
Hypo:SEagg vs. PFC:Ctrl	2.952	5.213	-2.261	0.08926	9	9	25.33	32
Hypo:SEagg vs. PFC:SEagg	2.952	5.013	-2.061	0.08926	9	9	23.09	32
PFC:Ctrl vs. PFC:SEagg	5.213	5.013	0.2	0.08926	9	9	2.241	32

## Sheet: ANOVA-Fig 4K
Table Analyzed	Fig 4K- Nrgn mRNA levels in Ctrl vs SEagg male
Two-way ANOVA	Ordinary
Alpha	0.05
Source of Variation	% of total variation	P value	P value summary	Significant?
Interaction	38.73	<0.0001	****	Yes
Brain Region	26.86	<0.0001	****	Yes
Treatment	17.72	<0.0001	****	Yes
ANOVA table	SS	DF	MS	F (DFn, DFd)	P value
Interaction	5.722	1	5.722	F (1, 32) = 74.27	P<0.0001
Brain Region	3.969	1	3.969	F (1, 32) = 51.51	P<0.0001
Treatment	2.617	1	2.617	F (1, 32) = 33.97	P<0.0001
Residual	2.465	32	0.07705
Difference between column means
Mean of Ctrl	0.5522
Mean of SEagg	1.092
Difference between means	-0.5393
SE of difference	0.09252
95% CI of difference	-0.7277 to -0.3508
Difference between row means
Mean of Hypo	1.154
Mean of PFC	0.4898
Difference between means	0.6641
SE of difference	0.09252
95% CI of difference	0.4756 to 0.8525
Interaction CI
Mean diff, A1 - B1	-1.337
Mean diff, A2 - B2	0.2581
(A1 -B1) - (A2 - B2)	-1.595
95% CI of difference	-1.972 to -1.218
(B1 - A1) - (B2 - A2)	1.595
95% CI of difference	1.218 to 1.972
Data summary
Number of columns (Treatment)	2
Number of rows (Brain Region)	2
Number of values	36
Bonferroni's multiple comparisons test	Mean Diff.	95.00% CI of diff.	Below threshold?	Summary	Adjusted P Value
Hypo:Ctrl vs. Hypo:SEagg	-1.337	-1.705 to -0.9687	Yes	****	<0.0001
Hypo:Ctrl vs. PFC:Ctrl	-0.1333	-0.5013 to 0.2347	No	ns	>0.9999
Hypo:Ctrl vs. PFC:SEagg	0.1248	-0.2432 to 0.4928	No	ns	>0.9999
Hypo:SEagg vs. PFC:Ctrl	1.203	0.8353 to 1.571	Yes	****	<0.0001
Hypo:SEagg vs. PFC:SEagg	1.461	1.093 to 1.829	Yes	****	<0.0001
PFC:Ctrl vs. PFC:SEagg	0.2581	-0.1099 to 0.6261	No	ns	0.3434
Test details	Mean 1	Mean 2	Mean Diff.	SE of diff.	N1	N2	t	DF
Hypo:Ctrl vs. Hypo:SEagg	0.4856	1.822	-1.337	0.1308	9	9	10.22	32
Hypo:Ctrl vs. PFC:Ctrl	0.4856	0.6189	-0.1333	0.1308	9	9	1.019	32
Hypo:Ctrl vs. PFC:SEagg	0.4856	0.3608	0.1248	0.1308	9	9	0.9536	32
Hypo:SEagg vs. PFC:Ctrl	1.822	0.6189	1.203	0.1308	9	9	9.196	32
Hypo:SEagg vs. PFC:SEagg	1.822	0.3608	1.461	0.1308	9	9	11.17	32
PFC:Ctrl vs. PFC:SEagg	0.6189	0.3608	0.2581	0.1308	9	9	1.973	32

## Sheet: ANOVA-Fig4L
Table Analyzed	Fig 4L- Nrgn protein levels in Ctrl vs SEagg male
Two-way ANOVA	Ordinary
Alpha	0.05
Source of Variation	% of total variation	P value	P value summary	Significant?
Interaction	14.23	0.005	**	Yes
Brain Region	78	<0.0001	****	Yes
Treatment	0.02725	0.8709	ns	No
ANOVA table	SS	DF	MS	F (DFn, DFd)	P value
Interaction	85.6	1	85.6	F (1, 8) = 14.71	P=0.0050
Brain Region	469.1	1	469.1	F (1, 8) = 80.63	P<0.0001
Treatment	0.1639	1	0.1639	F (1, 8) = 0.02817	P=0.8709
Residual	46.55	8	5.818
Difference between column means
Mean of Ctrl	11.69
Mean of SEagg	11.92
Difference between means	-0.2337
SE of difference	1.393
95% CI of difference	-3.445 to 2.978
Difference between row means
Mean of Hypo	5.554
Mean of PFC	18.06
Difference between means	-12.51
SE of difference	1.393
95% CI of difference	-15.72 to -9.294
Interaction CI
Mean diff, A1 - B1	5.108
Mean diff, A2 - B2	-5.575
(A1 -B1) - (A2 - B2)	10.68
95% CI of difference	4.260 to 17.11
(B1 - A1) - (B2 - A2)	-10.68
95% CI of difference	-17.11 to -4.260
Data summary
Number of columns (Treatment)	2
Number of rows (Brain Region)	2
Number of values	12
Bonferroni's multiple comparisons test	Mean Diff.	95.00% CI of diff.	Below threshold?	Summary	Adjusted P Value
Hypo:Ctrl vs. Hypo:SEagg	5.108	-1.744 to 11.96	No	ns	0.1916
Hypo:Ctrl vs. PFC:Ctrl	-7.164	-14.02 to -0.3121	Yes	*	0.0397
Hypo:Ctrl vs. PFC:SEagg	-12.74	-19.59 to -5.887	Yes	**	0.0012
Hypo:SEagg vs. PFC:Ctrl	-12.27	-19.12 to -5.420	Yes	**	0.0015
Hypo:SEagg vs. PFC:SEagg	-17.85	-24.70 to -11.00	Yes	***	0.0001
PFC:Ctrl vs. PFC:SEagg	-5.575	-12.43 to 1.276	No	ns	0.1327
Test details	Mean 1	Mean 2	Mean Diff.	SE of diff.	N1	N2	t	DF
Hypo:Ctrl vs. Hypo:SEagg	8.108	3	5.108	1.969	3	3	2.593	8
Hypo:Ctrl vs. PFC:Ctrl	8.108	15.27	-7.164	1.969	3	3	3.637	8
Hypo:Ctrl vs. PFC:SEagg	8.108	20.85	-12.74	1.969	3	3	6.468	8
Hypo:SEagg vs. PFC:Ctrl	3	15.27	-12.27	1.969	3	3	6.231	8
Hypo:SEagg vs. PFC:SEagg	3	20.85	-17.85	1.969	3	3	9.062	8
PFC:Ctrl vs. PFC:SEagg	15.27	20.85	-5.575	1.969	3	3	2.831	8

[truncated: 10 more sheets: ANOVA-Fig7, Sheet7, Sheet8, Sheet9, Sheet10, Sheet11, Sheet12, Sheet13, Sheet14, Sheet15]
