# Supplementary material for: Early life stressful experiences escalate aggressive behavior in adulthood via changes in transthyretin expression and function
Source: eLife. 2022 Oct 13;11:e77968. doi: 10.7554/eLife.77968 (PMC9633068; doi:10.7554/eLife.77968)
Supplement: Supplementary file 3. [file elife-77968-supp3.xlsx]

## Sheet: Sheet1
Supplementary Table1- Primers used for qRT-PCR and MedIP-qPCR
S.No	Gene	Forward Primer Sequence	Reverse Primer Sequence
1	Apold1	TGGAGGCCAGAGTGAAGG	CCAGCAGCAATCCTTGGAAG
2	Btg2	GGGTTTCCTCTCCAGTCTCC	ACCTTGCTGATGATGGGGTC
3	Cyr61	CCAATGACAACCCAGAGTGC	CCGCATCTTCACAGTTCTGG
4	Cartpt	GACATCTACTCTGCCGTGGA	CAGGACTTCTTGCAACGCTT
5	Dcn	ATCACCAAGCTGCGGAAATC	GGCTCCGTTTTCAATCCCAG
6	DDx39b	TCCAGCATGAGTGCATCCCG	AAAAGCCAGCTCCCTAGTGT
7	Gas5	TTCATTTGGCTGGCTTGCTT	TTGTGTTTGCAGTGCCTTCA
8	Gapdh	TGTGTCCGTCGTGGATCTGA	CCTGCTTCACCACCTTCTTGA
9	Gm12840	GTACAAGTCCAGGCGTGG	CAGCAGCCACAACATT
10	Gm17508	TGAAGATATGGCACGCCCAG	AGCAAGGACACACACCAGTT
11	Hr	AAGCTAAATAGGGGATCCTG	ATTTGTAGAACGGACCACAC
12	Man1c1	CCAACCATGACAACAGGCAA	GATGAGCCTCGGTGTTGAAC
13	Nr4a	CTGTGGGCATGGTGAAGGAA	GAGGCTGCTTGGGTTTTGAA
14	Nrn1	CACAGCTCTTACGGATTGCC	CAGAAGGAAAACCAGGTCGC
15	Nrgn	TAAAGAGCGGAGAGTGTGGC	AGGGGCTCACAAACACAGTA
16	Oxt	CCATCACCTACAGCGGATCT	CAGATGCTTGGTCCGAAGC
17	Pvalb	ATTGAGGAGGATGAGCTGGG	GTCCCCATCCTTGTCTCCAG
18	Rtn4r	TCCCTGACAACACCTTTCGA	ATGGTTCTGGTGCAAGAGGA
19	Sox2ot	ATCTCCAGGCAGAAGAGGAC	TCTGCTCAGTGGCTTCTCAA
20	Trh	TCGTGCTAACTGGTATCCCC	TCTCTTCGGCTTCAACGTCT
21	Ttr	GCTTCCCTTCGACTCTTCCT	TTACAGCCACGTCTACAGCA
22	Ttr Promoter	AGCGAGTGTTCCGATACTC	ACCCCCTCCTTCCAACCCA
23	Zbtb16	AGTGCCTGAAGATCCTGGAG	TGGCTGAGAGACCGAAAGAG
